# Supplementary material
Source: publisher figshare collection journal article supplement (https://acs.figshare.com/ndownloader/files/24693597)
Supplement: Supplementary file 1 [file 24693597]

## Sheet: Cit_DI_analysis
Index	Scan_title	Peptide	Mod_peptide	Protein	Charge	mz_Precursor	Cit_Count	precNL_count	seqNL_count	intNL_count	Total_NL_count	Dipeptide_count	Tripeptide_count	Total_INT_count	IM-NH3_count	Cit_probability	Cit_prediction	Manual_inspection
1	20160312_02_A1.10012.10012.2 File:"20160312_02_A1.raw", NativeID:"controllerType=0 controllerNumber=1 scan=10012"	YETSGIGEAR+0.984VK	YETSGIGEArVK	sp|P61764|STXB1_HUMAN(pre=K,post=E);sp|P61764-2|STXB1_HUMAN(pre=K,post=E);tr|A0A0D9SG72|A0A0D9SG72_HUMAN(pre=K,post=E);tr|A0A1B0GWF2|A0A1B0GWF2_HUMAN(pre=K,post=E);tr|A0A1B0GW76|A0A1B0GW76_HUMAN(pre=K,post=E);tr|A0A1B0GTP9|A0A1B0GTP9_HUMAN(pre=K,post=E);tr|A0A1B0GVQ5|A0A1B0GVQ5_HUMAN(pre=K,post=E);tr|A0A2R8Y5D4|A0A2R8Y5D4_HUMAN(pre=K,post=E)	2	655.834	1	0	6	5	11	1	0	1	0	0.999922	1	Valid
2	20160312_02_A1.10045.10045.2 File:"20160312_02_A1.raw", NativeID:"controllerType=0 controllerNumber=1 scan=10045"	NIVTPR+0.984TPPPSQGK	NIVTPrTPPPSQGK	tr|H7BYR8|H7BYR8_HUMAN(pre=K,post=G);sp|P02686|MBP_HUMAN(pre=K,post=G);sp|P02686-3|MBP_HUMAN(pre=K,post=G);sp|P02686-4|MBP_HUMAN(pre=K,post=G);sp|P02686-5|MBP_HUMAN(pre=K,post=G);sp|P02686-6|MBP_HUMAN(pre=K,post=G);tr|C9J6H1|C9J6H1_HUMAN(pre=K,post=G);tr|J3QL64|J3QL64_HUMAN(pre=K,post=G);tr|E9PJ72|E9PJ72_HUMAN(pre=K,post=G);tr|J3QKL5|J3QKL5_HUMAN(pre=K,post=G);tr|J3KT01|J3KT01_HUMAN(pre=K,post=G)…	2	746.91	1	2	9	6	17	3	3	6	0	1	1	Valid
3	20160312_02_A1.10116.10116.3 File:"20160312_02_A1.raw", NativeID:"controllerType=0 controllerNumber=1 scan=10116"	NIVTPR+0.984TPPPSQGK	NIVTPrTPPPSQGK	tr|H7BYR8|H7BYR8_HUMAN(pre=K,post=G);sp|P02686|MBP_HUMAN(pre=K,post=G);sp|P02686-3|MBP_HUMAN(pre=K,post=G);sp|P02686-4|MBP_HUMAN(pre=K,post=G);sp|P02686-5|MBP_HUMAN(pre=K,post=G);sp|P02686-6|MBP_HUMAN(pre=K,post=G);tr|C9J6H1|C9J6H1_HUMAN(pre=K,post=G);tr|J3QL64|J3QL64_HUMAN(pre=K,post=G);tr|E9PJ72|E9PJ72_HUMAN(pre=K,post=G);tr|J3QKL5|J3QKL5_HUMAN(pre=K,post=G);tr|J3KT01|J3KT01_HUMAN(pre=K,post=G)…	3	498.276	1	0	2	3	5	2	3	5	0	0.997999	1	Valid
4	20160312_02_A1.10222.10222.2 File:"20160312_02_A1.raw", NativeID:"controllerType=0 controllerNumber=1 scan=10222"	NIVTPR+0.984TPPPSQGK	NIVTPrTPPPSQGK	tr|H7BYR8|H7BYR8_HUMAN(pre=K,post=G);sp|P02686|MBP_HUMAN(pre=K,post=G);sp|P02686-3|MBP_HUMAN(pre=K,post=G);sp|P02686-4|MBP_HUMAN(pre=K,post=G);sp|P02686-5|MBP_HUMAN(pre=K,post=G);sp|P02686-6|MBP_HUMAN(pre=K,post=G);tr|C9J6H1|C9J6H1_HUMAN(pre=K,post=G);tr|J3QL64|J3QL64_HUMAN(pre=K,post=G);tr|E9PJ72|E9PJ72_HUMAN(pre=K,post=G);tr|J3QKL5|J3QKL5_HUMAN(pre=K,post=G);tr|J3KT01|J3KT01_HUMAN(pre=K,post=G)…	2	746.91	1	2	9	8	19	3	4	7	0	1	1	Valid
5	20160312_02_A1.10334.10334.3 File:"20160312_02_A1.raw", NativeID:"controllerType=0 controllerNumber=1 scan=10334"	NIVTPR+0.984TPPPSQGK	NIVTPrTPPPSQGK	tr|H7BYR8|H7BYR8_HUMAN(pre=K,post=G);sp|P02686|MBP_HUMAN(pre=K,post=G);sp|P02686-3|MBP_HUMAN(pre=K,post=G);sp|P02686-4|MBP_HUMAN(pre=K,post=G);sp|P02686-5|MBP_HUMAN(pre=K,post=G);sp|P02686-6|MBP_HUMAN(pre=K,post=G);tr|C9J6H1|C9J6H1_HUMAN(pre=K,post=G);tr|J3QL64|J3QL64_HUMAN(pre=K,post=G);tr|E9PJ72|E9PJ72_HUMAN(pre=K,post=G);tr|J3QKL5|J3QKL5_HUMAN(pre=K,post=G);tr|J3KT01|J3KT01_HUMAN(pre=K,post=G)…	3	498.276	1	0	0	2	2	2	3	5	0	0.963886	1	Valid
6	20160312_02_A1.10362.10362.3 File:"20160312_02_A1.raw", NativeID:"controllerType=0 controllerNumber=1 scan=10362"	TPSTAHLR+0.984VPK	TPSTAHLrVPK	tr|B1AH95|B1AH95_HUMAN(pre=R,post=T);tr|F8WB77|F8WB77_HUMAN(pre=R,post=T);tr|F8WCH3|F8WCH3_HUMAN(pre=R,post=T)	3	403.232	1	0	1	0	1	0	0	0	0	0.278664	0	Ambiguous
7	20160312_02_A1.10418.10418.2 File:"20160312_02_A1.raw", NativeID:"controllerType=0 controllerNumber=1 scan=10418"	NIVTPR+0.984TPPPSQGK	NIVTPrTPPPSQGK	tr|H7BYR8|H7BYR8_HUMAN(pre=K,post=G);sp|P02686|MBP_HUMAN(pre=K,post=G);sp|P02686-3|MBP_HUMAN(pre=K,post=G);sp|P02686-4|MBP_HUMAN(pre=K,post=G);sp|P02686-5|MBP_HUMAN(pre=K,post=G);sp|P02686-6|MBP_HUMAN(pre=K,post=G);tr|C9J6H1|C9J6H1_HUMAN(pre=K,post=G);tr|J3QL64|J3QL64_HUMAN(pre=K,post=G);tr|E9PJ72|E9PJ72_HUMAN(pre=K,post=G);tr|J3QKL5|J3QKL5_HUMAN(pre=K,post=G);tr|J3KT01|J3KT01_HUMAN(pre=K,post=G)…	2	746.91	1	1	5	2	8	2	2	4	0	0.999794	1	Valid
8	20160312_02_A1.10479.10479.2 File:"20160312_02_A1.raw", NativeID:"controllerType=0 controllerNumber=1 scan=10479"	AQSR+0.984EQLAALK	AQSrEQLAALK	sp|Q9UII2|ATIF1_HUMAN(pre=R,post=K)	2	608.339	1	0	2	1	3	1	0	1	0	0.839242	1	Valid
9	20160312_02_A1.1054.1054.2 File:"20160312_02_A1.raw", NativeID:"controllerType=0 controllerNumber=1 scan=1054"	DSR+0.984SGSPM+15.995AR	DSrSGSPmAR	tr|H7BYR8|H7BYR8_HUMAN(pre=R,post=R);sp|P02686|MBP_HUMAN(pre=R,post=R);sp|P02686-3|MBP_HUMAN(pre=R,post=R);sp|P02686-4|MBP_HUMAN(pre=R,post=R);sp|P02686-5|MBP_HUMAN(pre=R,post=R);sp|P02686-6|MBP_HUMAN(pre=R,post=R);tr|E9PJ72|E9PJ72_HUMAN(pre=R,post=R);tr|A8MZH3|A8MZH3_HUMAN(pre=R,post=R);tr|J3QQK6|J3QQK6_HUMAN(pre=R,post=R);tr|F8WEU6|F8WEU6_HUMAN(pre=R,post=R)	2	540.741	1	0	1	2	3	2	0	2	1	0.993849	1	Valid
10	20160312_02_A1.10602.10602.2 File:"20160312_02_A1.raw", NativeID:"controllerType=0 controllerNumber=1 scan=10602"	NIVTPR+0.984TPPPSQGK	NIVTPrTPPPSQGK	tr|H7BYR8|H7BYR8_HUMAN(pre=K,post=G);sp|P02686|MBP_HUMAN(pre=K,post=G);sp|P02686-3|MBP_HUMAN(pre=K,post=G);sp|P02686-4|MBP_HUMAN(pre=K,post=G);sp|P02686-5|MBP_HUMAN(pre=K,post=G);sp|P02686-6|MBP_HUMAN(pre=K,post=G);tr|C9J6H1|C9J6H1_HUMAN(pre=K,post=G);tr|J3QL64|J3QL64_HUMAN(pre=K,post=G);tr|E9PJ72|E9PJ72_HUMAN(pre=K,post=G);tr|J3QKL5|J3QKL5_HUMAN(pre=K,post=G);tr|J3KT01|J3KT01_HUMAN(pre=K,post=G)…	2	746.91	1	0	2	3	5	2	2	4	0	0.996166	1	Valid
11	20160312_02_A1.10769.10769.2 File:"20160312_02_A1.raw", NativeID:"controllerType=0 controllerNumber=1 scan=10769"	NIVTPR+0.984TPPPSQ+0.984GK	NIVTPrTPPPSqGK	tr|H7BYR8|H7BYR8_HUMAN(pre=K,post=G);sp|P02686|MBP_HUMAN(pre=K,post=G);sp|P02686-3|MBP_HUMAN(pre=K,post=G);sp|P02686-4|MBP_HUMAN(pre=K,post=G);sp|P02686-5|MBP_HUMAN(pre=K,post=G);sp|P02686-6|MBP_HUMAN(pre=K,post=G);tr|C9J6H1|C9J6H1_HUMAN(pre=K,post=G);tr|J3QL64|J3QL64_HUMAN(pre=K,post=G);tr|E9PJ72|E9PJ72_HUMAN(pre=K,post=G);tr|J3QKL5|J3QKL5_HUMAN(pre=K,post=G);tr|J3KT01|J3KT01_HUMAN(pre=K,post=G)…	2	747.402	1	0	3	2	5	2	3	5	0	0.997999	1	Valid
12	20160312_02_A1.11398.11398.2 File:"20160312_02_A1.raw", NativeID:"controllerType=0 controllerNumber=1 scan=11398"	GGTSR+0.984ALAAASSVK	GGTSrALAAASSVK	sp|Q8N568|DCLK2_HUMAN(pre=K,post=S);sp|Q8N568-2|DCLK2_HUMAN(pre=K,post=S);sp|Q8N568-3|DCLK2_HUMAN(pre=K,post=S);tr|G5E9L9|G5E9L9_HUMAN(pre=K,post=S);tr|A0A0U1RR70|A0A0U1RR70_HUMAN(pre=K,post=S)	2	638.847	1	2	3	2	7	3	3	6	0	0.999852	1	Valid
13	20160312_02_A1.11557.11557.2 File:"20160312_02_A1.raw", NativeID:"controllerType=0 controllerNumber=1 scan=11557"	TVEMR+0.984DGEVIK	TVEMrDGEVIK	sp|P14136|GFAP_HUMAN(pre=K,post=E);tr|K7EMP8|K7EMP8_HUMAN(pre=K,post=E);tr|A0A1X7SBR3|A0A1X7SBR3_HUMAN(pre=K,post=E)	2	639.324	1	0	5	9	14	2	1	3	0	0.999999	1	Valid
14	20160312_02_A1.1192.1192.2 File:"20160312_02_A1.raw", NativeID:"controllerType=0 controllerNumber=1 scan=1192"	DSR+0.984SGSPM+15.995AR	DSrSGSPmAR	tr|H7BYR8|H7BYR8_HUMAN(pre=R,post=R);sp|P02686|MBP_HUMAN(pre=R,post=R);sp|P02686-3|MBP_HUMAN(pre=R,post=R);sp|P02686-4|MBP_HUMAN(pre=R,post=R);sp|P02686-5|MBP_HUMAN(pre=R,post=R);sp|P02686-6|MBP_HUMAN(pre=R,post=R);tr|E9PJ72|E9PJ72_HUMAN(pre=R,post=R);tr|A8MZH3|A8MZH3_HUMAN(pre=R,post=R);tr|J3QQK6|J3QQK6_HUMAN(pre=R,post=R);tr|F8WEU6|F8WEU6_HUMAN(pre=R,post=R)	2	540.741	1	0	3	2	5	4	0	4	1	0.999761	1	Valid
15	20160312_02_A1.13187.13187.3 File:"20160312_02_A1.raw", NativeID:"controllerType=0 controllerNumber=1 scan=13187"	MFGGPGTASR+0.984PSSSRSYVTTSTR	MFGGPGTASrPSSSRSYVTTSTR	sp|P08670|VIME_HUMAN(pre=R,post=T);tr|B0YJC4|B0YJC4_HUMAN(pre=R,post=T);tr|A0A1B0GVG8|A0A1B0GVG8_HUMAN(pre=R,post=T);tr|A0A1B0GTT5|A0A1B0GTT5_HUMAN(pre=R,post=T)	3	797.717	1	0	5	4	9	0	0	0	0	0.998948	1	Valid
16	20160312_02_A1.13206.13206.4 File:"20160312_02_A1.raw", NativeID:"controllerType=0 controllerNumber=1 scan=13206"	YLATASTM+15.995DHAR+0.984HGFLPR	YLATASTmDHArHGFLPR	tr|H7BYR8|H7BYR8_HUMAN(pre=K,post=H);sp|P02686|MBP_HUMAN(pre=K,post=H);sp|P02686-2|MBP_HUMAN(pre=K,post=H);sp|P02686-3|MBP_HUMAN(pre=K,post=H);sp|P02686-4|MBP_HUMAN(pre=K,post=H);sp|P02686-5|MBP_HUMAN(pre=K,post=H);sp|P02686-6|MBP_HUMAN(pre=K,post=H);tr|E9PLQ9|E9PLQ9_HUMAN(pre=K,post=T);tr|E9PKX9|E9PKX9_HUMAN(pre=K,post=H);tr|J3QL64|J3QL64_HUMAN(pre=K,post=H);tr|J3KT34|J3KT34_HUMAN(pre=K,post=H);…	4	516.005	1	0	1	0	1	0	0	0	0	0.278664	0	Valid
17	20160312_02_A1.13207.13207.3 File:"20160312_02_A1.raw", NativeID:"controllerType=0 controllerNumber=1 scan=13207"	YLATASTM+15.995DHAR+0.984HGFLPR	YLATASTmDHArHGFLPR	tr|H7BYR8|H7BYR8_HUMAN(pre=K,post=H);sp|P02686|MBP_HUMAN(pre=K,post=H);sp|P02686-2|MBP_HUMAN(pre=K,post=H);sp|P02686-3|MBP_HUMAN(pre=K,post=H);sp|P02686-4|MBP_HUMAN(pre=K,post=H);sp|P02686-5|MBP_HUMAN(pre=K,post=H);sp|P02686-6|MBP_HUMAN(pre=K,post=H);tr|E9PLQ9|E9PLQ9_HUMAN(pre=K,post=T);tr|E9PKX9|E9PKX9_HUMAN(pre=K,post=H);tr|J3QL64|J3QL64_HUMAN(pre=K,post=H);tr|J3KT34|J3KT34_HUMAN(pre=K,post=H);…	3	687.671	1	0	3	0	3	0	0	0	0	0.731196	1	Valid
18	20160312_02_A1.13369.13369.2 File:"20160312_02_A1.raw", NativeID:"controllerType=0 controllerNumber=1 scan=13369"	EKEEKEEAR+0.984LR+0.984AK	EKEEKEEArLrAK	sp|Q6NWY9|PR40B_HUMAN(pre=R,post=E);sp|Q6NWY9-2|PR40B_HUMAN(pre=R,post=E);sp|Q6NWY9-3|PR40B_HUMAN(pre=R,post=E);tr|F8VU11|F8VU11_HUMAN(pre=R,post=E)	2	809.426	2	0	1	1	2	0	0	0	0	0.5062	1	Valid
19	20160312_02_A1.1344.1344.2 File:"20160312_02_A1.raw", NativeID:"controllerType=0 controllerNumber=1 scan=1344"	DSR+0.984SGSPM+15.995AR	DSrSGSPmAR	tr|H7BYR8|H7BYR8_HUMAN(pre=R,post=R);sp|P02686|MBP_HUMAN(pre=R,post=R);sp|P02686-3|MBP_HUMAN(pre=R,post=R);sp|P02686-4|MBP_HUMAN(pre=R,post=R);sp|P02686-5|MBP_HUMAN(pre=R,post=R);sp|P02686-6|MBP_HUMAN(pre=R,post=R);tr|E9PJ72|E9PJ72_HUMAN(pre=R,post=R);tr|A8MZH3|A8MZH3_HUMAN(pre=R,post=R);tr|J3QQK6|J3QQK6_HUMAN(pre=R,post=R);tr|F8WEU6|F8WEU6_HUMAN(pre=R,post=R)	2	540.741	1	0	1	1	2	1	0	1	1	0.969442	1	Valid
20	20160312_02_A1.13973.13973.3 File:"20160312_02_A1.raw", NativeID:"controllerType=0 controllerNumber=1 scan=13973"	LEMVVVNGR+0.984GDGPR	LEMVVVNGrGDGPR	sp|O94856|NFASC_HUMAN(pre=K,post=S);sp|O94856-3|NFASC_HUMAN(pre=K,post=S);sp|O94856-5|NFASC_HUMAN(pre=K,post=S);sp|O94856-6|NFASC_HUMAN(pre=K,post=S);sp|O94856-7|NFASC_HUMAN(pre=K,post=S);sp|O94856-8|NFASC_HUMAN(pre=K,post=S);sp|O94856-10|NFASC_HUMAN(pre=K,post=S);sp|O94856-11|NFASC_HUMAN(pre=K,post=S);sp|O94856-13|NFASC_HUMAN(pre=K,post=S);tr|X6RKN2|X6RKN2_HUMAN(pre=K,post=S)	3	500.593	1	0	1	0	1	0	1	1	0	0.425753	0	Valid
21	20160312_02_A1.14711.14711.2 File:"20160312_02_A1.raw", NativeID:"controllerType=0 controllerNumber=1 scan=14711"	STLAR+0.984VIVDK	STLArVIVDK	tr|K7ERC4|K7ERC4_HUMAN(pre=K,post=Y);tr|C9K0L8|C9K0L8_HUMAN(pre=K,post=Y);tr|K7ERZ0|K7ERZ0_HUMAN(pre=K,post=Y);tr|K7EN66|K7EN66_HUMAN(pre=K,post=Y);sp|P09543|CN37_HUMAN(pre=K,post=Y);sp|P09543-2|CN37_HUMAN(pre=K,post=Y)	2	551.828	1	0	3	1	4	2	2	4	0	0.989891	1	Valid
22	20160312_02_A1.14913.14913.2 File:"20160312_02_A1.raw", NativeID:"controllerType=0 controllerNumber=1 scan=14913"	STLAR+0.984VIVDK	STLArVIVDK	tr|K7ERC4|K7ERC4_HUMAN(pre=K,post=Y);tr|C9K0L8|C9K0L8_HUMAN(pre=K,post=Y);tr|K7ERZ0|K7ERZ0_HUMAN(pre=K,post=Y);tr|K7EN66|K7EN66_HUMAN(pre=K,post=Y);sp|P09543|CN37_HUMAN(pre=K,post=Y);sp|P09543-2|CN37_HUMAN(pre=K,post=Y)	2	551.828	1	0	3	1	4	1	2	3	0	0.980778	1	Valid
23	20160312_02_A1.1493.1493.2 File:"20160312_02_A1.raw", NativeID:"controllerType=0 controllerNumber=1 scan=1493"	DSR+0.984SGSPM+15.995AR	DSrSGSPmAR	tr|H7BYR8|H7BYR8_HUMAN(pre=R,post=R);sp|P02686|MBP_HUMAN(pre=R,post=R);sp|P02686-3|MBP_HUMAN(pre=R,post=R);sp|P02686-4|MBP_HUMAN(pre=R,post=R);sp|P02686-5|MBP_HUMAN(pre=R,post=R);sp|P02686-6|MBP_HUMAN(pre=R,post=R);tr|E9PJ72|E9PJ72_HUMAN(pre=R,post=R);tr|A8MZH3|A8MZH3_HUMAN(pre=R,post=R);tr|J3QQK6|J3QQK6_HUMAN(pre=R,post=R);tr|F8WEU6|F8WEU6_HUMAN(pre=R,post=R)	2	540.741	1	0	1	1	2	1	0	1	0	0.663002	1	Valid
24	20160312_02_A1.15239.15239.3 File:"20160312_02_A1.raw", NativeID:"controllerType=0 controllerNumber=1 scan=15239"	GAAGR+0.984PLELSDFR	GAAGrPLELSDFR	sp|P42167|LAP2B_HUMAN(pre=K,post=M);sp|P42167-2|LAP2B_HUMAN(pre=K,post=M);tr|G5E972|G5E972_HUMAN(pre=K,post=M);tr|H0YJH7|H0YJH7_HUMAN(pre=K,post=M)	3	463.909	1	0	0	0	0	0	1	1	0	0.218385	0	Valid
25	20160312_02_A1.1593.1593.2 File:"20160312_02_A1.raw", NativeID:"controllerType=0 controllerNumber=1 scan=1593"	DSR+0.984SGSPM+15.995AR	DSrSGSPmAR	tr|H7BYR8|H7BYR8_HUMAN(pre=R,post=R);sp|P02686|MBP_HUMAN(pre=R,post=R);sp|P02686-3|MBP_HUMAN(pre=R,post=R);sp|P02686-4|MBP_HUMAN(pre=R,post=R);sp|P02686-5|MBP_HUMAN(pre=R,post=R);sp|P02686-6|MBP_HUMAN(pre=R,post=R);tr|E9PJ72|E9PJ72_HUMAN(pre=R,post=R);tr|A8MZH3|A8MZH3_HUMAN(pre=R,post=R);tr|J3QQK6|J3QQK6_HUMAN(pre=R,post=R);tr|F8WEU6|F8WEU6_HUMAN(pre=R,post=R)	2	540.741	1	0	1	0	1	0	0	0	1	0.861678	1	Valid
26	20160312_02_A1.16019.16019.2 File:"20160312_02_A1.raw", NativeID:"controllerType=0 controllerNumber=1 scan=16019"	FADLSEAANR+0.984NNDALR	FADLSEAANrNNDALR	sp|P08670|VIME_HUMAN(pre=K,post=Q);tr|B0YJC4|B0YJC4_HUMAN(pre=K,post=Q);tr|B0YJC5|B0YJC5_HUMAN(pre=K,post=Q)	2	889.427	1	0	6	2	8	1	0	1	0	0.998546	1	Valid
27	20160312_02_A1.16334.16334.3 File:"20160312_02_A1.raw", NativeID:"controllerType=0 controllerNumber=1 scan=16334"	NLDIER+0.984PTYTNLNR	NLDIErPTYTNLNR	sp|Q6PEY2|TBA3E_HUMAN(pre=R,post=L);sp|P0DPH7|TBA3C_HUMAN(pre=R,post=L);sp|P0DPH7-2|TBA3C_HUMAN(pre=R,post=L);sp|Q9NY65|TBA8_HUMAN(pre=R,post=L);sp|Q9NY65-2|TBA8_HUMAN(pre=R,post=L);sp|P68363|TBA1B_HUMAN(pre=R,post=L);sp|Q9BQE3|TBA1C_HUMAN(pre=R,post=L);sp|P0DPH8|TBA3D_HUMAN(pre=R,post=L);sp|Q71U36|TBA1A_HUMAN(pre=R,post=L);sp|Q71U36-2|TBA1A_HUMAN(pre=R,post=L);sp|P68366|TBA4A_HUMAN(pre=R,post=L)…	3	573.961	1	0	1	2	3	1	0	1	0	0.839242	1	Valid
28	20160312_02_A1.16340.16340.3 File:"20160312_02_A1.raw", NativeID:"controllerType=0 controllerNumber=1 scan=16340"	YVETPR+0.984VHISSVR+0.984SGYSTAR	YVETPrVHISSVrSGYSTAR	sp|P07196|NFL_HUMAN(pre=R,post=S);tr|A0A0S2Z436|A0A0S2Z436_HUMAN(pre=R,post=S);tr|A0A087X0W2|A0A087X0W2_HUMAN(pre=R,post=S)	3	756.386	2	0	4	1	5	2	1	3	0	0.992668	1	Valid
29	20160312_02_A1.16587.16587.2 File:"20160312_02_A1.raw", NativeID:"controllerType=0 controllerNumber=1 scan=16587"	RR+0.984SSIDGSEPAK	RrSSIDGSEPAK	sp|Q6NV75|GP153_HUMAN(pre=K,post=T)	2	652.334	1	0	1	0	1	0	0	0	0	0.278664	0	Valid
30	20160312_02_A1.17915.17915.2 File:"20160312_02_A1.raw", NativeID:"controllerType=0 controllerNumber=1 scan=17915"	R+0.984QSQSRSPKRDTTR	rQSQSRSPKRDTTR	sp|Q99590|SCAFB_HUMAN(pre=R,post=E);sp|Q99590-2|SCAFB_HUMAN(pre=R,post=E);tr|A0A0A0MTP7|A0A0A0MTP7_HUMAN(pre=R,post=E);tr|F8VXG7|F8VXG7_HUMAN(pre=R,post=E)	2	852.449	1	1	0	0	1	0	0	0	0	0.278664	0	Valid
31	20160312_02_A1.1878.1878.2 File:"20160312_02_A1.raw", NativeID:"controllerType=0 controllerNumber=1 scan=1878"	DSR+0.984SGSPM+15.995AR+0.984R	DSrSGSPmArR	tr|H7BYR8|H7BYR8_HUMAN(pre=R,post=-);sp|P02686|MBP_HUMAN(pre=R,post=-);sp|P02686-3|MBP_HUMAN(pre=R,post=-);sp|P02686-4|MBP_HUMAN(pre=R,post=-);sp|P02686-5|MBP_HUMAN(pre=R,post=-);sp|P02686-6|MBP_HUMAN(pre=R,post=-);tr|E9PJ72|E9PJ72_HUMAN(pre=R,post=-);tr|A8MZH3|A8MZH3_HUMAN(pre=R,post=-);tr|J3QQK6|J3QQK6_HUMAN(pre=R,post=-);tr|F8WEU6|F8WEU6_HUMAN(pre=R,post=-)	2	619.284	2	0	4	0	4	0	0	0	0	0.878318	1	Valid
32	20160312_02_A1.19516.19516.3 File:"20160312_02_A1.raw", NativeID:"controllerType=0 controllerNumber=1 scan=19516"	KKLR+0.984RM+15.995N+0.984R+0.984FTVAELK	KKLrRmnrFTVAELK	sp|Q13435|SF3B2_HUMAN(pre=K,post=Q);tr|E9PPJ0|E9PPJ0_HUMAN(pre=K,post=Q)	3	637.028	2	0	1	1	2	0	0	0	0	0.5062	1	Valid
33	20160312_02_A1.2041.2041.2 File:"20160312_02_A1.raw", NativeID:"controllerType=0 controllerNumber=1 scan=2041"	DSR+0.984SGSPM+15.995AR+0.984R	DSrSGSPmArR	tr|H7BYR8|H7BYR8_HUMAN(pre=R,post=-);sp|P02686|MBP_HUMAN(pre=R,post=-);sp|P02686-3|MBP_HUMAN(pre=R,post=-);sp|P02686-4|MBP_HUMAN(pre=R,post=-);sp|P02686-5|MBP_HUMAN(pre=R,post=-);sp|P02686-6|MBP_HUMAN(pre=R,post=-);tr|E9PJ72|E9PJ72_HUMAN(pre=R,post=-);tr|A8MZH3|A8MZH3_HUMAN(pre=R,post=-);tr|J3QQK6|J3QQK6_HUMAN(pre=R,post=-);tr|F8WEU6|F8WEU6_HUMAN(pre=R,post=-)	2	619.284	2	0	5	1	6	3	0	3	1	0.999827	1	Valid
34	20160312_02_A1.2045.2045.2 File:"20160312_02_A1.raw", NativeID:"controllerType=0 controllerNumber=1 scan=2045"	DSR+0.984SGSPM+15.995AR	DSrSGSPmAR	tr|H7BYR8|H7BYR8_HUMAN(pre=R,post=R);sp|P02686|MBP_HUMAN(pre=R,post=R);sp|P02686-3|MBP_HUMAN(pre=R,post=R);sp|P02686-4|MBP_HUMAN(pre=R,post=R);sp|P02686-5|MBP_HUMAN(pre=R,post=R);sp|P02686-6|MBP_HUMAN(pre=R,post=R);tr|E9PJ72|E9PJ72_HUMAN(pre=R,post=R);tr|A8MZH3|A8MZH3_HUMAN(pre=R,post=R);tr|J3QQK6|J3QQK6_HUMAN(pre=R,post=R);tr|F8WEU6|F8WEU6_HUMAN(pre=R,post=R)	2	540.741	1	0	1	0	1	0	0	0	1	0.861678	1	Valid
35	20160312_02_A1.20554.20554.4 File:"20160312_02_A1.raw", NativeID:"controllerType=0 controllerNumber=1 scan=20554"	N+0.984KTFFLEIGEPR+0.984LVEMSEKK	nKTFFLEIGEPrLVEMSEKK	sp|P32418|NAC1_HUMAN(pre=K,post=A);sp|P32418-5|NAC1_HUMAN(pre=K,post=A);tr|E7EV41|E7EV41_HUMAN(pre=K,post=G)	4	600.065	1	0	0	2	2	0	0	0	0	0.5062	1	Valid
36	20160312_02_A1.206.206.2 File:"20160312_02_A1.raw", NativeID:"controllerType=0 controllerNumber=1 scan=206"	DSR+0.984SGSPM+15.995AR	DSrSGSPmAR	tr|H7BYR8|H7BYR8_HUMAN(pre=R,post=R);sp|P02686|MBP_HUMAN(pre=R,post=R);sp|P02686-3|MBP_HUMAN(pre=R,post=R);sp|P02686-4|MBP_HUMAN(pre=R,post=R);sp|P02686-5|MBP_HUMAN(pre=R,post=R);sp|P02686-6|MBP_HUMAN(pre=R,post=R);tr|E9PJ72|E9PJ72_HUMAN(pre=R,post=R);tr|A8MZH3|A8MZH3_HUMAN(pre=R,post=R);tr|J3QQK6|J3QQK6_HUMAN(pre=R,post=R);tr|F8WEU6|F8WEU6_HUMAN(pre=R,post=R)	2	540.741	1	0	1	0	1	0	0	0	1	0.861678	1	Valid
37	20160312_02_A1.20939.20939.3 File:"20160312_02_A1.raw", NativeID:"controllerType=0 controllerNumber=1 scan=20939"	SLFEKKR+0.984GAPPSSN+0.984IEDFHGLLPK	SLFEKKrGAPPSSnIEDFHGLLPK	sp|P43243|MATR3_HUMAN(pre=R,post=G);tr|A8MXP9|A8MXP9_HUMAN(pre=R,post=G);tr|A0A0R4J2E8|A0A0R4J2E8_HUMAN(pre=R,post=G);tr|D6REM6|D6REM6_HUMAN(pre=R,post=G);tr|D6R991|D6R991_HUMAN(pre=R,post=G);tr|H0Y8T4|H0Y8T4_HUMAN(pre=R,post=G)	3	890.47	1	0	1	2	3	1	0	1	0	0.839242	1	Valid
38	20160312_02_A1.21406.21406.2 File:"20160312_02_A1.raw", NativeID:"controllerType=0 controllerNumber=1 scan=21406"	SVQ+0.984KSLYGER+0.984DIASKK	SVqKSLYGErDIASKK	sp|Q69YH5|CDCA2_HUMAN(pre=K,post=P);tr|E9PEI0|E9PEI0_HUMAN(pre=K,post=P)	2	905.981	1	0	0	2	2	1	0	1	0	0.663002	1	Valid
39	20160312_02_A1.2350.2350.2 File:"20160312_02_A1.raw", NativeID:"controllerType=0 controllerNumber=1 scan=2350"	SGSPMAR+0.984R	SGSPMArR	tr|H7BYR8|H7BYR8_HUMAN(pre=R,post=-);sp|P02686|MBP_HUMAN(pre=R,post=-);sp|P02686-3|MBP_HUMAN(pre=R,post=-);sp|P02686-4|MBP_HUMAN(pre=R,post=-);sp|P02686-5|MBP_HUMAN(pre=R,post=-);sp|P02686-6|MBP_HUMAN(pre=R,post=-);tr|E9PJ72|E9PJ72_HUMAN(pre=R,post=-);tr|A8MZH3|A8MZH3_HUMAN(pre=R,post=-);tr|J3QQK6|J3QQK6_HUMAN(pre=R,post=-);tr|F8WEU6|F8WEU6_HUMAN(pre=R,post=-)	2	431.714	1	0	4	0	4	0	0	0	0	0.878318	1	Valid
40	20160312_02_A1.23793.23793.4 File:"20160312_02_A1.raw", NativeID:"controllerType=0 controllerNumber=1 scan=23793"	VRM+15.995ADN+0.984EVMDAFR+0.984KIM+15.995AAR	VRmADnEVMDAFrKImAAR	sp|O75528|TADA3_HUMAN(pre=R,post=Q)	4	565.274	1	0	0	0	0	0	0	0	0	0.127083	0	Valid
41	20160312_02_A1.24037.24037.3 File:"20160312_02_A1.raw", NativeID:"controllerType=0 controllerNumber=1 scan=24037"	LGIVQ+0.984GIVGARNTSAASTAQ+0.984LVEATEELR+0.984	LGIVqGIVGARNTSAASTAqLVEATEELr	sp|P55268|LAMB2_HUMAN(pre=K,post=R)	3	986.52	1	0	0	0	0	0	0	0	0	0.127083	0	Ambiguous
42	20160312_02_A1.24369.24369.3 File:"20160312_02_A1.raw", NativeID:"controllerType=0 controllerNumber=1 scan=24369"	IREEYPDR+0.984IMNTFSVVPSPK	IREEYPDrIMNTFSVVPSPK	sp|P07437|TBB5_HUMAN(pre=K,post=V);sp|P68371|TBB4B_HUMAN(pre=K,post=V);tr|Q5ST81|Q5ST81_HUMAN(pre=K,post=V);tr|Q5JP53|Q5JP53_HUMAN(pre=K,post=V)	3	793.739	1	0	5	3	8	0	3	3	0	0.999605	1	Valid
43	20160312_02_A1.24400.24400.2 File:"20160312_02_A1.raw", NativeID:"controllerType=0 controllerNumber=1 scan=24400"	IREEYPDR+0.984IMNTFSVVPSPK	IREEYPDrIMNTFSVVPSPK	sp|P07437|TBB5_HUMAN(pre=K,post=V);sp|P68371|TBB4B_HUMAN(pre=K,post=V);tr|Q5ST81|Q5ST81_HUMAN(pre=K,post=V);tr|Q5JP53|Q5JP53_HUMAN(pre=K,post=V)	2	1190.1	1	1	0	2	3	0	0	0	0	0.731196	1	Valid
44	20160312_02_A1.24584.24584.3 File:"20160312_02_A1.raw", NativeID:"controllerType=0 controllerNumber=1 scan=24584"	IREEYPDR+0.984IMNTFSVMPSPK	IREEYPDrIMNTFSVMPSPK	sp|Q9BVA1|TBB2B_HUMAN(pre=K,post=V);sp|Q13885|TBB2A_HUMAN(pre=K,post=V)	3	804.397	1	0	3	3	6	0	3	3	0	0.997224	1	Valid
45	20160312_02_A1.24612.24612.2 File:"20160312_02_A1.raw", NativeID:"controllerType=0 controllerNumber=1 scan=24612"	IREEYPDR+0.984IMNTFSVMPSPK	IREEYPDrIMNTFSVMPSPK	sp|Q9BVA1|TBB2B_HUMAN(pre=K,post=V);sp|Q13885|TBB2A_HUMAN(pre=K,post=V)	2	1206.09	1	1	0	0	1	0	0	0	0	0.278664	0	Valid
46	20160312_02_A1.2491.2491.2 File:"20160312_02_A1.raw", NativeID:"controllerType=0 controllerNumber=1 scan=2491"	SGSPMAR+0.984R	SGSPMArR	tr|H7BYR8|H7BYR8_HUMAN(pre=R,post=-);sp|P02686|MBP_HUMAN(pre=R,post=-);sp|P02686-3|MBP_HUMAN(pre=R,post=-);sp|P02686-4|MBP_HUMAN(pre=R,post=-);sp|P02686-5|MBP_HUMAN(pre=R,post=-);sp|P02686-6|MBP_HUMAN(pre=R,post=-);tr|E9PJ72|E9PJ72_HUMAN(pre=R,post=-);tr|A8MZH3|A8MZH3_HUMAN(pre=R,post=-);tr|J3QQK6|J3QQK6_HUMAN(pre=R,post=-);tr|F8WEU6|F8WEU6_HUMAN(pre=R,post=-)	2	431.714	1	0	6	2	8	1	0	1	0	0.998546	1	Valid
47	20160312_02_A1.25594.25594.4 File:"20160312_02_A1.raw", NativeID:"controllerType=0 controllerNumber=1 scan=25594"	SVVLMSHLGR+0.984PDGVPMPDKYSLEPVAVELK	SVVLMSHLGrPDGVPMPDKYSLEPVAVELK	sp|P00558|PGK1_HUMAN(pre=K,post=S);sp|P00558-2|PGK1_HUMAN(pre=K,post=S)	4	816.931	1	0	0	0	0	0	0	0	0	0.127083	0	Valid
48	20160312_02_A1.2621.2621.2 File:"20160312_02_A1.raw", NativeID:"controllerType=0 controllerNumber=1 scan=2621"	DSR+0.984SGSPM+15.995AR	DSrSGSPmAR	tr|H7BYR8|H7BYR8_HUMAN(pre=R,post=R);sp|P02686|MBP_HUMAN(pre=R,post=R);sp|P02686-3|MBP_HUMAN(pre=R,post=R);sp|P02686-4|MBP_HUMAN(pre=R,post=R);sp|P02686-5|MBP_HUMAN(pre=R,post=R);sp|P02686-6|MBP_HUMAN(pre=R,post=R);tr|E9PJ72|E9PJ72_HUMAN(pre=R,post=R);tr|A8MZH3|A8MZH3_HUMAN(pre=R,post=R);tr|J3QQK6|J3QQK6_HUMAN(pre=R,post=R);tr|F8WEU6|F8WEU6_HUMAN(pre=R,post=R)	2	540.741	1	0	0	0	0	0	0	0	0	0.127083	0	Ambiguous
49	20160312_02_A1.2637.2637.2 File:"20160312_02_A1.raw", NativeID:"controllerType=0 controllerNumber=1 scan=2637"	SGSPMAR+0.984R	SGSPMArR	tr|H7BYR8|H7BYR8_HUMAN(pre=R,post=-);sp|P02686|MBP_HUMAN(pre=R,post=-);sp|P02686-3|MBP_HUMAN(pre=R,post=-);sp|P02686-4|MBP_HUMAN(pre=R,post=-);sp|P02686-5|MBP_HUMAN(pre=R,post=-);sp|P02686-6|MBP_HUMAN(pre=R,post=-);tr|E9PJ72|E9PJ72_HUMAN(pre=R,post=-);tr|A8MZH3|A8MZH3_HUMAN(pre=R,post=-);tr|J3QQK6|J3QQK6_HUMAN(pre=R,post=-);tr|F8WEU6|F8WEU6_HUMAN(pre=R,post=-)	2	431.714	1	0	5	2	7	1	0	1	0	0.996151	1	Valid
50	20160312_02_A1.26428.26428.3 File:"20160312_02_A1.raw", NativeID:"controllerType=0 controllerNumber=1 scan=26428"	IREEFPDR+0.984IMNTFSVVPSPK	IREEFPDrIMNTFSVVPSPK	sp|P04350|TBB4A_HUMAN(pre=K,post=V);tr|M0R042|M0R042_HUMAN(pre=K,post=V);tr|M0QYM7|M0QYM7_HUMAN(pre=K,post=V)	3	788.408	1	0	4	3	7	0	3	3	0	0.998952	1	Valid
51	20160312_02_A1.27215.27215.3 File:"20160312_02_A1.raw", NativeID:"controllerType=0 controllerNumber=1 scan=27215"	GSQQYR+0.984ALTVPELTQQMFDSK	GSQQYrALTVPELTQQMFDSK	sp|Q9BVA1|TBB2B_HUMAN(pre=R,post=N);sp|Q13885|TBB2A_HUMAN(pre=R,post=N)	3	810.066	1	0	0	1	1	0	0	0	0	0.278664	0	Valid
52	20160312_02_A1.27246.27246.2 File:"20160312_02_A1.raw", NativeID:"controllerType=0 controllerNumber=1 scan=27246"	GSQQYR+0.984ALTVPELTQQMFDSK	GSQQYrALTVPELTQQMFDSK	sp|Q9BVA1|TBB2B_HUMAN(pre=R,post=N);sp|Q13885|TBB2A_HUMAN(pre=R,post=N)	2	1214.59	1	0	0	1	1	1	0	1	0	0.425753	0	Valid
53	20160312_02_A1.27310.27310.2 File:"20160312_02_A1.raw", NativeID:"controllerType=0 controllerNumber=1 scan=27310"	GSQQYR+0.984ALTVPELTQQVFDAK	GSQQYrALTVPELTQQVFDAK	sp|P07437|TBB5_HUMAN(pre=R,post=N);tr|Q5ST81|Q5ST81_HUMAN(pre=R,post=N);tr|Q5JP53|Q5JP53_HUMAN(pre=R,post=N)	2	1190.61	1	0	1	2	3	2	1	3	0	0.950565	1	Valid
54	20160312_02_A1.27565.27565.3 File:"20160312_02_A1.raw", NativeID:"controllerType=0 controllerNumber=1 scan=27565"	GSQQYR+0.984ALTVPELTQQMFDAK	GSQQYrALTVPELTQQMFDAK	sp|P04350|TBB4A_HUMAN(pre=R,post=N);sp|Q13509|TBB3_HUMAN(pre=R,post=N);sp|Q13509-2|TBB3_HUMAN(pre=R,post=N);sp|P68371|TBB4B_HUMAN(pre=R,post=N);tr|A0A0B4J269|A0A0B4J269_HUMAN(pre=R,post=N)	3	804.734	1	0	0	0	0	0	0	0	0	0.127083	0	Valid
55	20160312_02_A1.27684.27684.3 File:"20160312_02_A1.raw", NativeID:"controllerType=0 controllerNumber=1 scan=27684"	HVPR+0.984AVFVDLEPTVIDEIR	HVPrAVFVDLEPTVIDEIR	sp|P68366|TBA4A_HUMAN(pre=K,post=N);sp|P68366-2|TBA4A_HUMAN(pre=K,post=N);tr|C9JDL2|C9JDL2_HUMAN(pre=K,post=N);tr|C9JQ00|C9JQ00_HUMAN(pre=K,post=N);tr|C9JEV8|C9JEV8_HUMAN(pre=K,post=N);tr|C9JJQ8|C9JJQ8_HUMAN(pre=K,post=N)	3	736.068	1	0	2	3	5	2	1	3	0	0.992668	1	Valid
56	20160312_02_A1.27709.27709.5 File:"20160312_02_A1.raw", NativeID:"controllerType=0 controllerNumber=1 scan=27709"	LWLFGYDEQR+0.984QPLTVEHMYEDISQDHVK	LWLFGYDEQrQPLTVEHMYEDISQDHVK	sp|Q9NT62|ATG3_HUMAN(pre=R,post=K);sp|Q9NT62-2|ATG3_HUMAN(pre=R,post=K)	5	696.335	1	0	0	0	0	0	0	0	0	0.127083	0	Ambiguous
57	20160312_02_A1.2940.2940.2 File:"20160312_02_A1.raw", NativeID:"controllerType=0 controllerNumber=1 scan=2940"	GR+0.984GTAAAAGPR	GrGTAAAAGPR	sp|Q9H201-2|EPN3_HUMAN(pre=R,post=H)	2	493.263	1	0	4	0	4	0	0	0	0	0.878318	1	Valid
58	20160312_02_A1.29628.29628.3 File:"20160312_02_A1.raw", NativeID:"controllerType=0 controllerNumber=1 scan=29628"	DTGILDSIGR+0.984FFGGDRGAPK	DTGILDSIGrFFGGDRGAPK	tr|H7BYR8|H7BYR8_HUMAN(pre=R,post=R);sp|P02686|MBP_HUMAN(pre=R,post=R);sp|P02686-2|MBP_HUMAN(pre=R,post=R);sp|P02686-3|MBP_HUMAN(pre=R,post=R);sp|P02686-4|MBP_HUMAN(pre=R,post=R);sp|P02686-5|MBP_HUMAN(pre=R,post=R);sp|P02686-6|MBP_HUMAN(pre=R,post=R);tr|E9PKX9|E9PKX9_HUMAN(pre=R,post=R);tr|J3QL64|J3QL64_HUMAN(pre=R,post=R);tr|E9PJ72|E9PJ72_HUMAN(pre=R,post=R);tr|J3KT34|J3KT34_HUMAN(pre=R,post=R);…	3	694.021	1	0	1	0	1	0	0	0	0	0.278664	0	Valid
59	20160312_02_A1.30073.30073.3 File:"20160312_02_A1.raw", NativeID:"controllerType=0 controllerNumber=1 scan=30073"	GDRTGRYGATDR+0.984SQDDGGENRSR	GDRTGRYGATDrSQDDGGENRSR	sp|P98175|RBM10_HUMAN(pre=R,post=D);sp|P98175-2|RBM10_HUMAN(pre=R,post=D);sp|P98175-3|RBM10_HUMAN(pre=R,post=D);sp|P98175-4|RBM10_HUMAN(pre=R,post=D);sp|P98175-5|RBM10_HUMAN(pre=R,post=D)	3	843.048	1	0	0	0	0	0	1	1	0	0.218385	0	Valid
60	20160312_02_A1.30124.30124.3 File:"20160312_02_A1.raw", NativeID:"controllerType=0 controllerNumber=1 scan=30124"	LKEQFVKDQ+0.984ER+0.984R+0.984QAAR	LKEQFVKDqErrQAAR	sp|Q96RT7|GCP6_HUMAN(pre=R,post=Q);sp|Q96RT7-2|GCP6_HUMAN(pre=R,post=Q);sp|Q96RT7-3|GCP6_HUMAN(pre=R,post=Q);tr|E7EQL8|E7EQL8_HUMAN(pre=R,post=Q)	3	669.021	2	0	0	1	1	0	0	0	0	0.278664	0	Valid
61	20160312_02_A1.31162.31162.3 File:"20160312_02_A1.raw", NativeID:"controllerType=0 controllerNumber=1 scan=31162"	R+0.984SYSSSSGSLMPSLENLDLSQVAAISNDLK	rSYSSSSGSLMPSLENLDLSQVAAISNDLK	sp|P07196|NFL_HUMAN(pre=R,post=S);tr|A0A0S2Z436|A0A0S2Z436_HUMAN(pre=R,post=S);tr|A0A087X0W2|A0A087X0W2_HUMAN(pre=R,post=S)	3	1057.52	1	0	0	0	0	0	0	0	0	0.127083	0	Valid
62	20160312_02_A1.3208.3208.2 File:"20160312_02_A1.raw", NativeID:"controllerType=0 controllerNumber=1 scan=3208"	R+0.984ITSAAR+0.984R	rITSAArR	sp|P14136|GFAP_HUMAN(pre=R,post=S);sp|P14136-2|GFAP_HUMAN(pre=R,post=S);sp|P14136-3|GFAP_HUMAN(pre=R,post=S);tr|B4DIR1|B4DIR1_HUMAN(pre=R,post=S);tr|K7ELP4|K7ELP4_HUMAN(pre=R,post=S);tr|K7EMP8|K7EMP8_HUMAN(pre=R,post=S);tr|K7EKH9|K7EKH9_HUMAN(pre=R,post=S);tr|A0A1X7SCE1|A0A1X7SCE1_HUMAN(pre=R,post=S);tr|A0A1X7SBR3|A0A1X7SBR3_HUMAN(pre=R,post=S);tr|A0A1W2PR46|A0A1W2PR46_HUMAN(pre=R,post=S);tr|K7EJ…	2	466.768	2	0	2	0	2	0	0	0	0	0.5062	1	Valid
63	20160312_02_A1.323.323.2 File:"20160312_02_A1.raw", NativeID:"controllerType=0 controllerNumber=1 scan=323"	DSR+0.984SGSPM+15.995AR	DSrSGSPmAR	tr|H7BYR8|H7BYR8_HUMAN(pre=R,post=R);sp|P02686|MBP_HUMAN(pre=R,post=R);sp|P02686-3|MBP_HUMAN(pre=R,post=R);sp|P02686-4|MBP_HUMAN(pre=R,post=R);sp|P02686-5|MBP_HUMAN(pre=R,post=R);sp|P02686-6|MBP_HUMAN(pre=R,post=R);tr|E9PJ72|E9PJ72_HUMAN(pre=R,post=R);tr|A8MZH3|A8MZH3_HUMAN(pre=R,post=R);tr|J3QQK6|J3QQK6_HUMAN(pre=R,post=R);tr|F8WEU6|F8WEU6_HUMAN(pre=R,post=R)	2	540.741	1	0	1	1	2	1	0	1	1	0.969442	1	Valid
64	20160312_02_A1.32378.32378.4 File:"20160312_02_A1.raw", NativeID:"controllerType=0 controllerNumber=1 scan=32378"	GHIEWPDFLSHESLLLLQ+0.984Q+0.984LR+0.984PQNSLLR	GHIEWPDFLSHESLLLLqqLrPQNSLLR	sp|Q9UPV7|PHF24_HUMAN(pre=R,post=L)	4	836.443	1	0	0	0	0	0	0	0	0	0.127083	0	Ambiguous
65	20160312_02_A1.3280.3280.2 File:"20160312_02_A1.raw", NativeID:"controllerType=0 controllerNumber=1 scan=3280"	VSR+0.984VASPK	VSrVASPK	sp|P46821|MAP1B_HUMAN(pre=K,post=K)	2	422.749	1	0	3	2	5	4	0	4	0	0.996166	1	Valid
66	20160312_02_A1.33883.33883.2 File:"20160312_02_A1.raw", NativeID:"controllerType=0 controllerNumber=1 scan=33883"	RERVR+0.984QLR	RERVrQLR	sp|Q86W50|MET16_HUMAN(pre=K,post=E)	2	557.334	1	0	2	0	2	0	0	0	0	0.5062	1	Valid
67	20160312_02_A1.3392.3392.2 File:"20160312_02_A1.raw", NativeID:"controllerType=0 controllerNumber=1 scan=3392"	TVTNDR+0.984SAPR	TVTNDrSAPR	sp|Q765P7|MTSSL_HUMAN(pre=R,post=I);tr|A0A087WXN9|A0A087WXN9_HUMAN(pre=R,post=I)	2	559.284	1	1	7	2	10	2	0	2	0	0.999892	1	Valid
68	20160312_02_A1.3491.3491.2 File:"20160312_02_A1.raw", NativeID:"controllerType=0 controllerNumber=1 scan=3491"	DSR+0.984SGSPMAR	DSrSGSPMAR	tr|H7BYR8|H7BYR8_HUMAN(pre=R,post=R);sp|P02686|MBP_HUMAN(pre=R,post=R);sp|P02686-3|MBP_HUMAN(pre=R,post=R);sp|P02686-4|MBP_HUMAN(pre=R,post=R);sp|P02686-5|MBP_HUMAN(pre=R,post=R);sp|P02686-6|MBP_HUMAN(pre=R,post=R);tr|E9PJ72|E9PJ72_HUMAN(pre=R,post=R);tr|A8MZH3|A8MZH3_HUMAN(pre=R,post=R);tr|J3QQK6|J3QQK6_HUMAN(pre=R,post=R);tr|F8WEU6|F8WEU6_HUMAN(pre=R,post=R)	2	532.744	1	0	2	2	4	4	0	4	0	0.989891	1	Valid
69	20160312_02_A1.35241.35241.3 File:"20160312_02_A1.raw", NativeID:"controllerType=0 controllerNumber=1 scan=35241"	HISDLYEDLR+0.984DGHNLISLLEVLSGDSLPR	HISDLYEDLrDGHNLISLLEVLSGDSLPR	sp|Q15149|PLEC_HUMAN(pre=R,post=E);sp|Q15149-2|PLEC_HUMAN(pre=R,post=E);sp|Q15149-3|PLEC_HUMAN(pre=R,post=E);sp|Q15149-4|PLEC_HUMAN(pre=R,post=E);sp|Q15149-5|PLEC_HUMAN(pre=R,post=E);sp|Q15149-6|PLEC_HUMAN(pre=R,post=E);sp|Q15149-7|PLEC_HUMAN(pre=R,post=E);sp|Q15149-8|PLEC_HUMAN(pre=R,post=E);sp|Q15149-9|PLEC_HUMAN(pre=R,post=E);tr|E9PMV1|E9PMV1_HUMAN(pre=R,post=E);tr|H0YDN1|H0YDN1_HUMAN(pre=R,po…	3	1093.23	1	0	0	0	0	0	0	0	0	0.127083	0	Ambiguous
70	20160312_02_A1.3549.3549.2 File:"20160312_02_A1.raw", NativeID:"controllerType=0 controllerNumber=1 scan=3549"	R+0.984R+0.984ITSAAR	rrITSAAR	sp|P14136|GFAP_HUMAN(pre=R,post=R);sp|P14136-2|GFAP_HUMAN(pre=R,post=R);sp|P14136-3|GFAP_HUMAN(pre=R,post=R);tr|B4DIR1|B4DIR1_HUMAN(pre=R,post=R);tr|K7ELP4|K7ELP4_HUMAN(pre=R,post=R);tr|K7EMP8|K7EMP8_HUMAN(pre=R,post=R);tr|K7EKH9|K7EKH9_HUMAN(pre=R,post=R);tr|A0A1X7SCE1|A0A1X7SCE1_HUMAN(pre=R,post=R);tr|A0A1X7SBR3|A0A1X7SBR3_HUMAN(pre=R,post=R);tr|A0A1W2PR46|A0A1W2PR46_HUMAN(pre=R,post=R);tr|K7EJ…	2	466.768	2	0	2	0	2	0	0	0	1	0.942956	1	Valid
71	20160312_02_A1.3572.3572.2 File:"20160312_02_A1.raw", NativeID:"controllerType=0 controllerNumber=1 scan=3572"	DSR+0.984SGSPM+15.995AR	DSrSGSPmAR	tr|H7BYR8|H7BYR8_HUMAN(pre=R,post=R);sp|P02686|MBP_HUMAN(pre=R,post=R);sp|P02686-3|MBP_HUMAN(pre=R,post=R);sp|P02686-4|MBP_HUMAN(pre=R,post=R);sp|P02686-5|MBP_HUMAN(pre=R,post=R);sp|P02686-6|MBP_HUMAN(pre=R,post=R);tr|E9PJ72|E9PJ72_HUMAN(pre=R,post=R);tr|A8MZH3|A8MZH3_HUMAN(pre=R,post=R);tr|J3QQK6|J3QQK6_HUMAN(pre=R,post=R);tr|F8WEU6|F8WEU6_HUMAN(pre=R,post=R)	2	540.741	1	0	1	1	2	1	0	1	1	0.969442	1	Valid
72	20160312_02_A1.3625.3625.2 File:"20160312_02_A1.raw", NativeID:"controllerType=0 controllerNumber=1 scan=3625"	DSR+0.984SGSPMAR	DSrSGSPMAR	tr|H7BYR8|H7BYR8_HUMAN(pre=R,post=R);sp|P02686|MBP_HUMAN(pre=R,post=R);sp|P02686-3|MBP_HUMAN(pre=R,post=R);sp|P02686-4|MBP_HUMAN(pre=R,post=R);sp|P02686-5|MBP_HUMAN(pre=R,post=R);sp|P02686-6|MBP_HUMAN(pre=R,post=R);tr|E9PJ72|E9PJ72_HUMAN(pre=R,post=R);tr|A8MZH3|A8MZH3_HUMAN(pre=R,post=R);tr|J3QQK6|J3QQK6_HUMAN(pre=R,post=R);tr|F8WEU6|F8WEU6_HUMAN(pre=R,post=R)	2	532.744	1	0	4	2	6	4	0	4	0	0.998552	1	Valid
73	20160312_02_A1.3794.3794.2 File:"20160312_02_A1.raw", NativeID:"controllerType=0 controllerNumber=1 scan=3794"	DSR+0.984SGSPMAR	DSrSGSPMAR	tr|H7BYR8|H7BYR8_HUMAN(pre=R,post=R);sp|P02686|MBP_HUMAN(pre=R,post=R);sp|P02686-3|MBP_HUMAN(pre=R,post=R);sp|P02686-4|MBP_HUMAN(pre=R,post=R);sp|P02686-5|MBP_HUMAN(pre=R,post=R);sp|P02686-6|MBP_HUMAN(pre=R,post=R);tr|E9PJ72|E9PJ72_HUMAN(pre=R,post=R);tr|A8MZH3|A8MZH3_HUMAN(pre=R,post=R);tr|J3QQK6|J3QQK6_HUMAN(pre=R,post=R);tr|F8WEU6|F8WEU6_HUMAN(pre=R,post=R)	2	532.744	1	0	1	0	1	0	0	0	0	0.278664	0	Valid
74	20160312_02_A1.3871.3871.2 File:"20160312_02_A1.raw", NativeID:"controllerType=0 controllerNumber=1 scan=3871"	DNR+0.984VVGSAR	DNrVVGSAR	sp|O00139|KIF2A_HUMAN(pre=R,post=A);sp|O00139-1|KIF2A_HUMAN(pre=R,post=A);sp|O00139-2|KIF2A_HUMAN(pre=R,post=A);sp|O00139-4|KIF2A_HUMAN(pre=R,post=A);sp|O00139-5|KIF2A_HUMAN(pre=R,post=A);tr|D6R9M0|D6R9M0_HUMAN(pre=R,post=A)	2	487.755	1	0	0	0	0	0	0	0	0	0.127083	0	Valid
75	20160312_02_A1.4024.4024.2 File:"20160312_02_A1.raw", NativeID:"controllerType=0 controllerNumber=1 scan=4024"	LVTGDR+0.984NNSSC+57.021R	LVTGDrNNSScR	sp|P17302|CXA1_HUMAN(pre=K,post=N)	2	690.321	1	2	9	4	15	3	1	4	0	1	1	Valid
76	20160312_02_A1.4094.4094.2 File:"20160312_02_A1.raw", NativeID:"controllerType=0 controllerNumber=1 scan=4094"	DSR+0.984SGSPMAR	DSrSGSPMAR	tr|H7BYR8|H7BYR8_HUMAN(pre=R,post=R);sp|P02686|MBP_HUMAN(pre=R,post=R);sp|P02686-3|MBP_HUMAN(pre=R,post=R);sp|P02686-4|MBP_HUMAN(pre=R,post=R);sp|P02686-5|MBP_HUMAN(pre=R,post=R);sp|P02686-6|MBP_HUMAN(pre=R,post=R);tr|E9PJ72|E9PJ72_HUMAN(pre=R,post=R);tr|A8MZH3|A8MZH3_HUMAN(pre=R,post=R);tr|J3QQK6|J3QQK6_HUMAN(pre=R,post=R);tr|F8WEU6|F8WEU6_HUMAN(pre=R,post=R)	2	532.744	1	0	1	1	2	1	0	1	0	0.663002	1	Valid
77	20160312_02_A1.441.441.2 File:"20160312_02_A1.raw", NativeID:"controllerType=0 controllerNumber=1 scan=441"	DSR+0.984SGSPM+15.995AR	DSrSGSPmAR	tr|H7BYR8|H7BYR8_HUMAN(pre=R,post=R);sp|P02686|MBP_HUMAN(pre=R,post=R);sp|P02686-3|MBP_HUMAN(pre=R,post=R);sp|P02686-4|MBP_HUMAN(pre=R,post=R);sp|P02686-5|MBP_HUMAN(pre=R,post=R);sp|P02686-6|MBP_HUMAN(pre=R,post=R);tr|E9PJ72|E9PJ72_HUMAN(pre=R,post=R);tr|A8MZH3|A8MZH3_HUMAN(pre=R,post=R);tr|J3QQK6|J3QQK6_HUMAN(pre=R,post=R);tr|F8WEU6|F8WEU6_HUMAN(pre=R,post=R)	2	540.741	1	0	1	2	3	2	0	2	1	0.993849	1	Valid
78	20160312_02_A1.4435.4435.2 File:"20160312_02_A1.raw", NativeID:"controllerType=0 controllerNumber=1 scan=4435"	R+0.984SAPSGPVR	rSAPSGPVR	sp|P38159|RBMX_HUMAN(pre=K,post=S);sp|P38159-2|RBMX_HUMAN(pre=K,post=S);tr|H0Y6E7|H0Y6E7_HUMAN(pre=K,post=S);tr|H3BUY5|H3BUY5_HUMAN(pre=K,post=S);tr|H3BT71|H3BT71_HUMAN(pre=K,post=S)	2	464.255	1	0	2	0	2	0	0	0	0	0.5062	1	Valid
79	20160312_02_A1.4504.4504.2 File:"20160312_02_A1.raw", NativeID:"controllerType=0 controllerNumber=1 scan=4504"	DSR+0.984SGSPMAR+0.984R	DSrSGSPMArR	tr|H7BYR8|H7BYR8_HUMAN(pre=R,post=-);sp|P02686|MBP_HUMAN(pre=R,post=-);sp|P02686-3|MBP_HUMAN(pre=R,post=-);sp|P02686-4|MBP_HUMAN(pre=R,post=-);sp|P02686-5|MBP_HUMAN(pre=R,post=-);sp|P02686-6|MBP_HUMAN(pre=R,post=-);tr|E9PJ72|E9PJ72_HUMAN(pre=R,post=-);tr|A8MZH3|A8MZH3_HUMAN(pre=R,post=-);tr|J3QQK6|J3QQK6_HUMAN(pre=R,post=-);tr|F8WEU6|F8WEU6_HUMAN(pre=R,post=-)	2	611.286	2	0	9	1	10	1	0	1	1	0.999987	1	Valid
80	20160312_02_A1.4659.4659.2 File:"20160312_02_A1.raw", NativeID:"controllerType=0 controllerNumber=1 scan=4659"	DSR+0.984SGSPMAR+0.984R	DSrSGSPMArR	tr|H7BYR8|H7BYR8_HUMAN(pre=R,post=-);sp|P02686|MBP_HUMAN(pre=R,post=-);sp|P02686-3|MBP_HUMAN(pre=R,post=-);sp|P02686-4|MBP_HUMAN(pre=R,post=-);sp|P02686-5|MBP_HUMAN(pre=R,post=-);sp|P02686-6|MBP_HUMAN(pre=R,post=-);tr|E9PJ72|E9PJ72_HUMAN(pre=R,post=-);tr|A8MZH3|A8MZH3_HUMAN(pre=R,post=-);tr|J3QQK6|J3QQK6_HUMAN(pre=R,post=-);tr|F8WEU6|F8WEU6_HUMAN(pre=R,post=-)	2	611.286	2	0	8	3	11	3	0	3	1	0.999999	1	Valid
81	20160312_02_A1.5499.5499.2 File:"20160312_02_A1.raw", NativeID:"controllerType=0 controllerNumber=1 scan=5499"	MPPPAKEGGR+0.984K	MPPPAKEGGrK	sp|Q8TD35|LKAM1_HUMAN(pre=-,post=G);sp|Q8TD35-2|LKAM1_HUMAN(pre=-,post=G)	2	584.811	1	0	0	0	0	0	0	0	0	0.127083	0	Valid
82	20160312_02_A1.559.559.2 File:"20160312_02_A1.raw", NativeID:"controllerType=0 controllerNumber=1 scan=559"	DSR+0.984SGSPM+15.995AR	DSrSGSPmAR	tr|H7BYR8|H7BYR8_HUMAN(pre=R,post=R);sp|P02686|MBP_HUMAN(pre=R,post=R);sp|P02686-3|MBP_HUMAN(pre=R,post=R);sp|P02686-4|MBP_HUMAN(pre=R,post=R);sp|P02686-5|MBP_HUMAN(pre=R,post=R);sp|P02686-6|MBP_HUMAN(pre=R,post=R);tr|E9PJ72|E9PJ72_HUMAN(pre=R,post=R);tr|A8MZH3|A8MZH3_HUMAN(pre=R,post=R);tr|J3QQK6|J3QQK6_HUMAN(pre=R,post=R);tr|F8WEU6|F8WEU6_HUMAN(pre=R,post=R)	2	540.741	1	0	1	1	2	1	0	1	1	0.969442	1	Valid
83	20160312_02_A1.5671.5671.2 File:"20160312_02_A1.raw", NativeID:"controllerType=0 controllerNumber=1 scan=5671"	FESR+0.984SGGYGGSR	FESrSGGYGGSR	sp|Q14011|CIRBP_HUMAN(pre=R,post=D);sp|Q14011-2|CIRBP_HUMAN(pre=R,post=D);sp|Q14011-3|CIRBP_HUMAN(pre=R,post=D);tr|D6W5Y5|D6W5Y5_HUMAN(pre=R,post=D);tr|K7EJV1|K7EJV1_HUMAN(pre=R,post=D);tr|K7EPM4|K7EPM4_HUMAN(pre=R,post=D);tr|K7EQR7|K7EQR7_HUMAN(pre=R,post=D);tr|K7EMY9|K7EMY9_HUMAN(pre=R,post=D)	2	630.784	1	0	1	0	1	0	0	0	0	0.278664	0	Valid
84	20160312_02_A1.6122.6122.2 File:"20160312_02_A1.raw", NativeID:"controllerType=0 controllerNumber=1 scan=6122"	R+0.984REQTEHRGEK	rREQTEHRGEK	sp|P51957|NEK4_HUMAN(pre=K,post=R);sp|P51957-2|NEK4_HUMAN(pre=K,post=R);sp|P51957-3|NEK4_HUMAN(pre=K,post=R);tr|E7EX48|E7EX48_HUMAN(pre=K,post=R)	2	713.861	1	1	0	0	1	0	0	0	0	0.278664	0	Valid
85	20160312_02_A1.6281.6281.2 File:"20160312_02_A1.raw", NativeID:"controllerType=0 controllerNumber=1 scan=6281"	VTETR+0.984SSFSR	VTETrSSFSR	sp|P07197|NFM_HUMAN(pre=R,post=V);tr|E7EMV2|E7EMV2_HUMAN(pre=R,post=V);tr|E7ESP9|E7ESP9_HUMAN(pre=R,post=V)	2	585.792	1	0	6	1	7	1	0	1	0	0.996151	1	Valid
86	20160312_02_A1.6454.6454.2 File:"20160312_02_A1.raw", NativeID:"controllerType=0 controllerNumber=1 scan=6454"	VTETR+0.984SSFSR	VTETrSSFSR	sp|P07197|NFM_HUMAN(pre=R,post=V);tr|E7EMV2|E7EMV2_HUMAN(pre=R,post=V);tr|E7ESP9|E7ESP9_HUMAN(pre=R,post=V)	2	585.792	1	0	4	1	5	1	0	1	0	0.973517	1	Valid
87	20160312_02_A1.679.679.2 File:"20160312_02_A1.raw", NativeID:"controllerType=0 controllerNumber=1 scan=679"	DSR+0.984SGSPM+15.995AR	DSrSGSPmAR	tr|H7BYR8|H7BYR8_HUMAN(pre=R,post=R);sp|P02686|MBP_HUMAN(pre=R,post=R);sp|P02686-3|MBP_HUMAN(pre=R,post=R);sp|P02686-4|MBP_HUMAN(pre=R,post=R);sp|P02686-5|MBP_HUMAN(pre=R,post=R);sp|P02686-6|MBP_HUMAN(pre=R,post=R);tr|E9PJ72|E9PJ72_HUMAN(pre=R,post=R);tr|A8MZH3|A8MZH3_HUMAN(pre=R,post=R);tr|J3QQK6|J3QQK6_HUMAN(pre=R,post=R);tr|F8WEU6|F8WEU6_HUMAN(pre=R,post=R)	2	540.741	1	0	1	1	2	1	0	1	1	0.969442	1	Valid
88	20160312_02_A1.7490.7490.2 File:"20160312_02_A1.raw", NativeID:"controllerType=0 controllerNumber=1 scan=7490"	R+0.984VTETR+0.984SSFSR	rVTETrSSFSR	sp|P07197|NFM_HUMAN(pre=R,post=V);tr|E7EMV2|E7EMV2_HUMAN(pre=R,post=V);tr|E7ESP9|E7ESP9_HUMAN(pre=R,post=V)	2	664.334	2	0	15	3	18	2	1	3	1	1	1	Valid
89	20160312_02_A1.7972.7972.2 File:"20160312_02_A1.raw", NativeID:"controllerType=0 controllerNumber=1 scan=7972"	TVEM+15.995R+0.984DGEVIK	TVEmrDGEVIK	sp|P14136|GFAP_HUMAN(pre=K,post=E);tr|K7EMP8|K7EMP8_HUMAN(pre=K,post=E);tr|A0A1X7SBR3|A0A1X7SBR3_HUMAN(pre=K,post=E)	2	647.322	1	0	5	2	7	1	1	2	0	0.997991	1	Valid
90	20160312_02_A1.8015.8015.2 File:"20160312_02_A1.raw", NativeID:"controllerType=0 controllerNumber=1 scan=8015"	GGDLM+15.995AYDR+0.984R	GGDLmAYDrR	sp|P61978|HNRPK_HUMAN(pre=R,post=G);sp|P61978-2|HNRPK_HUMAN(pre=R,post=G);sp|P61978-3|HNRPK_HUMAN(pre=R,post=G);tr|Q5T6W2|Q5T6W2_HUMAN(pre=R,post=G)	2	585.765	1	0	6	0	6	0	1	1	0	0.989852	1	Valid
91	20160312_02_A1.806.806.2 File:"20160312_02_A1.raw", NativeID:"controllerType=0 controllerNumber=1 scan=806"	DSR+0.984SGSPM+15.995AR	DSrSGSPmAR	tr|H7BYR8|H7BYR8_HUMAN(pre=R,post=R);sp|P02686|MBP_HUMAN(pre=R,post=R);sp|P02686-3|MBP_HUMAN(pre=R,post=R);sp|P02686-4|MBP_HUMAN(pre=R,post=R);sp|P02686-5|MBP_HUMAN(pre=R,post=R);sp|P02686-6|MBP_HUMAN(pre=R,post=R);tr|E9PJ72|E9PJ72_HUMAN(pre=R,post=R);tr|A8MZH3|A8MZH3_HUMAN(pre=R,post=R);tr|J3QQK6|J3QQK6_HUMAN(pre=R,post=R);tr|F8WEU6|F8WEU6_HUMAN(pre=R,post=R)	2	540.741	1	0	1	1	2	1	0	1	1	0.969442	1	Valid
92	20160312_02_A1.8203.8203.2 File:"20160312_02_A1.raw", NativeID:"controllerType=0 controllerNumber=1 scan=8203"	STIGSR+0.984LQAK	STIGSrLQAK	tr|S4R305|S4R305_HUMAN(pre=R,post=V);sp|O75061|AUXI_HUMAN(pre=R,post=V);sp|O75061-2|AUXI_HUMAN(pre=R,post=V);sp|O75061-3|AUXI_HUMAN(pre=R,post=V);sp|O75061-4|AUXI_HUMAN(pre=R,post=V)	2	531.302	1	0	7	7	14	1	3	4	0	0.999999	1	Valid
93	20160312_02_A1.8972.8972.2 File:"20160312_02_A1.raw", NativeID:"controllerType=0 controllerNumber=1 scan=8972"	ILEQQNSSR+0.984TLEK	ILEQQNSSrTLEK	sp|Q16181|SEPT7_HUMAN(pre=R,post=N);sp|Q16181-2|SEPT7_HUMAN(pre=R,post=N);tr|Q5JXL7|Q5JXL7_HUMAN(pre=R,post=N);tr|E7ES33|E7ES33_HUMAN(pre=R,post=N);tr|E7EPK1|E7EPK1_HUMAN(pre=R,post=N);tr|G3V1Q4|G3V1Q4_HUMAN(pre=R,post=N)	2	773.908	1	0	8	0	8	0	0	0	0	0.997214	1	Valid
94	20160312_02_A1.93.93.2 File:"20160312_02_A1.raw", NativeID:"controllerType=0 controllerNumber=1 scan=93"	DSR+0.984SGSPM+15.995AR	DSrSGSPmAR	tr|H7BYR8|H7BYR8_HUMAN(pre=R,post=R);sp|P02686|MBP_HUMAN(pre=R,post=R);sp|P02686-3|MBP_HUMAN(pre=R,post=R);sp|P02686-4|MBP_HUMAN(pre=R,post=R);sp|P02686-5|MBP_HUMAN(pre=R,post=R);sp|P02686-6|MBP_HUMAN(pre=R,post=R);tr|E9PJ72|E9PJ72_HUMAN(pre=R,post=R);tr|A8MZH3|A8MZH3_HUMAN(pre=R,post=R);tr|J3QQK6|J3QQK6_HUMAN(pre=R,post=R);tr|F8WEU6|F8WEU6_HUMAN(pre=R,post=R)	2	540.741	1	0	1	0	1	0	0	0	0	0.278664	0	Valid
95	20160312_02_A1.932.932.2 File:"20160312_02_A1.raw", NativeID:"controllerType=0 controllerNumber=1 scan=932"	DSR+0.984SGSPM+15.995AR	DSrSGSPmAR	tr|H7BYR8|H7BYR8_HUMAN(pre=R,post=R);sp|P02686|MBP_HUMAN(pre=R,post=R);sp|P02686-3|MBP_HUMAN(pre=R,post=R);sp|P02686-4|MBP_HUMAN(pre=R,post=R);sp|P02686-5|MBP_HUMAN(pre=R,post=R);sp|P02686-6|MBP_HUMAN(pre=R,post=R);tr|E9PJ72|E9PJ72_HUMAN(pre=R,post=R);tr|A8MZH3|A8MZH3_HUMAN(pre=R,post=R);tr|J3QQK6|J3QQK6_HUMAN(pre=R,post=R);tr|F8WEU6|F8WEU6_HUMAN(pre=R,post=R)	2	540.741	1	0	1	2	3	2	0	2	1	0.993849	1	Valid
96	20160312_02_A1.9509.9509.2 File:"20160312_02_A1.raw", NativeID:"controllerType=0 controllerNumber=1 scan=9509"	TTQR+0.984IVAPPGGR	TTQrIVAPPGGR	sp|Q16555|DPYL2_HUMAN(pre=R,post=A);sp|Q16555-2|DPYL2_HUMAN(pre=R,post=A);tr|A0A1C7CYX9|A0A1C7CYX9_HUMAN(pre=R,post=A)	2	627.352	1	0	4	3	7	4	3	7	0	0.999923	1	Valid
97	20160312_03_A2.10219.10219.2 File:"20160312_03_A2.raw", NativeID:"controllerType=0 controllerNumber=1 scan=10219"	ILEQQN+0.984SSR+0.984TLEK	ILEQQnSSrTLEK	sp|Q16181|SEPT7_HUMAN(pre=R,post=N);sp|Q16181-2|SEPT7_HUMAN(pre=R,post=N);tr|Q5JXL7|Q5JXL7_HUMAN(pre=R,post=N);tr|E7ES33|E7ES33_HUMAN(pre=R,post=N);tr|E7EPK1|E7EPK1_HUMAN(pre=R,post=N);tr|G3V1Q4|G3V1Q4_HUMAN(pre=R,post=N)	2	774.4	1	0	9	1	10	0	0	0	0	0.999603	1	Valid
98	20160312_03_A2.10462.10462.2 File:"20160312_03_A2.raw", NativeID:"controllerType=0 controllerNumber=1 scan=10462"	TASLTSAASVDGNR+0.984SR	TASLTSAASVDGNrSR	sp|Q9UN36|NDRG2_HUMAN(pre=R,post=S);sp|Q9UN36-2|NDRG2_HUMAN(pre=R,post=S);sp|Q9UN36-3|NDRG2_HUMAN(pre=R,post=S);sp|Q9UN36-4|NDRG2_HUMAN(pre=R,post=S);sp|Q9UN36-5|NDRG2_HUMAN(pre=R,post=S);sp|Q9UN36-6|NDRG2_HUMAN(pre=R,post=S);tr|A0A0A0MS87|A0A0A0MS87_HUMAN(pre=R,post=S);tr|G3V578|G3V578_HUMAN(pre=R,post=S);tr|H0YJT9|H0YJT9_HUMAN(pre=R,post=S)	2	797.396	1	0	8	0	8	0	0	0	0	0.997214	1	Valid
99	20160312_03_A2.10470.10470.2 File:"20160312_03_A2.raw", NativeID:"controllerType=0 controllerNumber=1 scan=10470"	TASLTSAASVDGNR+0.984SR	TASLTSAASVDGNrSR	sp|Q9UN36|NDRG2_HUMAN(pre=R,post=S);sp|Q9UN36-2|NDRG2_HUMAN(pre=R,post=S);sp|Q9UN36-3|NDRG2_HUMAN(pre=R,post=S);sp|Q9UN36-4|NDRG2_HUMAN(pre=R,post=S);sp|Q9UN36-5|NDRG2_HUMAN(pre=R,post=S);sp|Q9UN36-6|NDRG2_HUMAN(pre=R,post=S);tr|A0A0A0MS87|A0A0A0MS87_HUMAN(pre=R,post=S);tr|G3V578|G3V578_HUMAN(pre=R,post=S);tr|H0YJT9|H0YJT9_HUMAN(pre=R,post=S)	2	797.396	1	0	8	0	8	0	0	0	0	0.997214	1	Valid
100	20160312_03_A2.10933.10933.2 File:"20160312_03_A2.raw", NativeID:"controllerType=0 controllerNumber=1 scan=10933"	GPGPGGPGGAGVAR+0.984GGAGGGPSGD	GPGPGGPGGAGVArGGAGGGPSGD	sp|Q92686|NEUG_HUMAN(pre=K,post=-)	2	910.42	1	0	4	4	8	0	0	0	0	0.997214	1	Valid
101	20160312_03_A2.10957.10957.3 File:"20160312_03_A2.raw", NativeID:"controllerType=0 controllerNumber=1 scan=10957"	EAGTVGR+0.984GGGQEERPFVAR	EAGTVGrGGGQEERPFVAR	sp|Q9HA64|KT3K_HUMAN(pre=K,post=F);tr|I3L2G3|I3L2G3_HUMAN(pre=K,post=F)	3	658.665	1	1	8	3	12	1	1	2	0	0.999985	1	Valid
102	20160312_03_A2.11079.11079.2 File:"20160312_03_A2.raw", NativeID:"controllerType=0 controllerNumber=1 scan=11079"	NIVTPR+0.984TPPPSQ+0.984GK	NIVTPrTPPPSqGK	tr|H7BYR8|H7BYR8_HUMAN(pre=K,post=G);sp|P02686|MBP_HUMAN(pre=K,post=G);sp|P02686-3|MBP_HUMAN(pre=K,post=G);sp|P02686-4|MBP_HUMAN(pre=K,post=G);sp|P02686-5|MBP_HUMAN(pre=K,post=G);sp|P02686-6|MBP_HUMAN(pre=K,post=G);tr|C9J6H1|C9J6H1_HUMAN(pre=K,post=G);tr|J3QL64|J3QL64_HUMAN(pre=K,post=G);tr|E9PJ72|E9PJ72_HUMAN(pre=K,post=G);tr|J3QKL5|J3QKL5_HUMAN(pre=K,post=G);tr|J3KT01|J3KT01_HUMAN(pre=K,post=G)…	2	747.402	1	1	10	6	17	3	4	7	0	1	1	Valid
103	20160312_03_A2.11141.11141.3 File:"20160312_03_A2.raw", NativeID:"controllerType=0 controllerNumber=1 scan=11141"	NIVTPR+0.984TPPPSQ+0.984GK	NIVTPrTPPPSqGK	tr|H7BYR8|H7BYR8_HUMAN(pre=K,post=G);sp|P02686|MBP_HUMAN(pre=K,post=G);sp|P02686-3|MBP_HUMAN(pre=K,post=G);sp|P02686-4|MBP_HUMAN(pre=K,post=G);sp|P02686-5|MBP_HUMAN(pre=K,post=G);sp|P02686-6|MBP_HUMAN(pre=K,post=G);tr|C9J6H1|C9J6H1_HUMAN(pre=K,post=G);tr|J3QL64|J3QL64_HUMAN(pre=K,post=G);tr|E9PJ72|E9PJ72_HUMAN(pre=K,post=G);tr|J3QKL5|J3QKL5_HUMAN(pre=K,post=G);tr|J3KT01|J3KT01_HUMAN(pre=K,post=G)…	3	498.604	1	0	0	2	2	2	2	4	0	0.932918	1	Valid
104	20160312_03_A2.11265.11265.2 File:"20160312_03_A2.raw", NativeID:"controllerType=0 controllerNumber=1 scan=11265"	NIVTPR+0.984TPPPSQ+0.984GK	NIVTPrTPPPSqGK	tr|H7BYR8|H7BYR8_HUMAN(pre=K,post=G);sp|P02686|MBP_HUMAN(pre=K,post=G);sp|P02686-3|MBP_HUMAN(pre=K,post=G);sp|P02686-4|MBP_HUMAN(pre=K,post=G);sp|P02686-5|MBP_HUMAN(pre=K,post=G);sp|P02686-6|MBP_HUMAN(pre=K,post=G);tr|C9J6H1|C9J6H1_HUMAN(pre=K,post=G);tr|J3QL64|J3QL64_HUMAN(pre=K,post=G);tr|E9PJ72|E9PJ72_HUMAN(pre=K,post=G);tr|J3QKL5|J3QKL5_HUMAN(pre=K,post=G);tr|J3KT01|J3KT01_HUMAN(pre=K,post=G)…	2	747.402	1	2	10	4	16	3	4	7	0	1	1	Valid
105	20160312_03_A2.11383.11383.2 File:"20160312_03_A2.raw", NativeID:"controllerType=0 controllerNumber=1 scan=11383"	GLDR+0.984VQDEYSR	GLDrVQDEYSR	sp|Q7L0J3|SV2A_HUMAN(pre=K,post=R);sp|Q7L0J3-2|SV2A_HUMAN(pre=K,post=R)	2	669.818	1	0	1	2	3	4	0	4	0	0.973617	1	Valid
106	20160312_03_A2.11625.11625.3 File:"20160312_03_A2.raw", NativeID:"controllerType=0 controllerNumber=1 scan=11625"	QASQAGPVPR+0.984TGPPTTQQPR	QASQAGPVPrTGPPTTQQPR	sp|P17600|SYN1_HUMAN(pre=R,post=P);sp|P17600-2|SYN1_HUMAN(pre=R,post=P)	3	692.36	1	0	1	2	3	1	2	3	0	0.950565	1	Valid
107	20160312_03_A2.11706.11706.2 File:"20160312_03_A2.raw", NativeID:"controllerType=0 controllerNumber=1 scan=11706"	TVEMR+0.984DGEVIK	TVEMrDGEVIK	sp|P14136|GFAP_HUMAN(pre=K,post=E);tr|K7EMP8|K7EMP8_HUMAN(pre=K,post=E);tr|A0A1X7SBR3|A0A1X7SBR3_HUMAN(pre=K,post=E)	2	639.324	1	0	5	3	8	1	2	3	0	0.999605	1	Valid
108	20160312_03_A2.11799.11799.2 File:"20160312_03_A2.raw", NativeID:"controllerType=0 controllerNumber=1 scan=11799"	QPSSPGPTPR+0.984NFSEAK	QPSSPGPTPrNFSEAK	sp|Q13424|SNTA1_HUMAN(pre=R,post=H);sp|Q13424-2|SNTA1_HUMAN(pre=R,post=H)	2	850.916	1	2	5	1	8	0	0	0	0	0.997214	1	Valid
109	20160312_03_A2.11905.11905.2 File:"20160312_03_A2.raw", NativeID:"controllerType=0 controllerNumber=1 scan=11905"	NR+0.984ETASELLMR	NrETASELLMR	sp|Q01082|SPTB2_HUMAN(pre=K,post=L);sp|Q01082-2|SPTB2_HUMAN(pre=K,post=L);sp|Q01082-3|SPTB2_HUMAN(pre=K,post=L);tr|A0A087WUZ3|A0A087WUZ3_HUMAN(pre=K,post=L)	2	660.833	1	2	1	0	3	0	0	0	0	0.731196	1	Valid
110	20160312_03_A2.11943.11943.2 File:"20160312_03_A2.raw", NativeID:"controllerType=0 controllerNumber=1 scan=11943"	TVEMR+0.984DGEVIK	TVEMrDGEVIK	sp|P14136|GFAP_HUMAN(pre=K,post=E);tr|K7EMP8|K7EMP8_HUMAN(pre=K,post=E);tr|A0A1X7SBR3|A0A1X7SBR3_HUMAN(pre=K,post=E)	2	639.324	1	0	6	11	17	2	3	5	0	1	1	Valid
111	20160312_03_A2.12132.12132.2 File:"20160312_03_A2.raw", NativeID:"controllerType=0 controllerNumber=1 scan=12132"	TVEMR+0.984DGEVIK	TVEMrDGEVIK	sp|P14136|GFAP_HUMAN(pre=K,post=E);tr|K7EMP8|K7EMP8_HUMAN(pre=K,post=E);tr|A0A1X7SBR3|A0A1X7SBR3_HUMAN(pre=K,post=E)	2	639.324	1	0	4	2	6	0	0	0	0	0.980705	1	Valid
112	20160312_03_A2.12195.12195.2 File:"20160312_03_A2.raw", NativeID:"controllerType=0 controllerNumber=1 scan=12195"	ALSR+0.984QEMQEVQSSR	ALSrQEMQEVQSSR	sp|P22626|ROA2_HUMAN(pre=K,post=S);sp|P22626-2|ROA2_HUMAN(pre=K,post=S)	2	825.4	1	0	1	2	3	2	2	4	0	0.973617	1	Valid
113	20160312_03_A2.12383.12383.2 File:"20160312_03_A2.raw", NativeID:"controllerType=0 controllerNumber=1 scan=12383"	ENAAAPSPVR+0.984APAPSPAK	ENAAAPSPVrAPAPSPAK	sp|O75781|PALM_HUMAN(pre=K,post=E);sp|O75781-2|PALM_HUMAN(pre=K,post=E)	2	866.455	1	0	6	1	7	0	1	1	0	0.996151	1	Valid
114	20160312_03_A2.12456.12456.2 File:"20160312_03_A2.raw", NativeID:"controllerType=0 controllerNumber=1 scan=12456"	SQSWSR+0.984GSPSTVSSSYK	SQSWSrGSPSTVSSSYK	sp|P07197|NFM_HUMAN(pre=R,post=R);tr|E7EMV2|E7EMV2_HUMAN(pre=R,post=R);tr|E7ESP9|E7ESP9_HUMAN(pre=R,post=R)	2	916.427	1	0	1	1	2	1	0	1	0	0.663002	1	Valid
115	20160312_03_A2.12550.12550.3 File:"20160312_03_A2.raw", NativeID:"controllerType=0 controllerNumber=1 scan=12550"	ITPGAR+0.984GAFSEEYKR	ITPGArGAFSEEYKR	tr|K7ERC4|K7ERC4_HUMAN(pre=K,post=L);tr|C9K0L8|C9K0L8_HUMAN(pre=K,post=L);tr|K7ERZ0|K7ERZ0_HUMAN(pre=K,post=L);tr|K7EN66|K7EN66_HUMAN(pre=K,post=L);sp|P09543|CN37_HUMAN(pre=K,post=L);sp|P09543-2|CN37_HUMAN(pre=K,post=L)	3	561.622	1	0	6	4	10	1	1	2	0	0.999892	1	Valid
116	20160312_03_A2.13144.13144.2 File:"20160312_03_A2.raw", NativeID:"controllerType=0 controllerNumber=1 scan=13144"	TVEMR+0.984DGEVIK	TVEMrDGEVIK	sp|P14136|GFAP_HUMAN(pre=K,post=E);tr|K7EMP8|K7EMP8_HUMAN(pre=K,post=E);tr|A0A1X7SBR3|A0A1X7SBR3_HUMAN(pre=K,post=E)	2	639.324	1	1	5	7	13	1	1	2	0	0.999994	1	Valid
117	20160312_03_A2.13152.13152.2 File:"20160312_03_A2.raw", NativeID:"controllerType=0 controllerNumber=1 scan=13152"	LGEYEDVSR+0.984VEK	LGEYEDVSrVEK	sp|Q99426|TBCB_HUMAN(pre=R,post=Y);sp|Q99426-2|TBCB_HUMAN(pre=R,post=Y);tr|K7EP07|K7EP07_HUMAN(pre=R,post=Y);tr|K7EK42|K7EK42_HUMAN(pre=R,post=Y)	2	712.849	1	0	7	3	10	1	0	1	0	0.999793	1	Valid
118	20160312_03_A2.13187.13187.3 File:"20160312_03_A2.raw", NativeID:"controllerType=0 controllerNumber=1 scan=13187"	TPGTPGTPSYPR+0.984TPHTPGTPK	TPGTPGTPSYPrTPHTPGTPK	sp|P11137|MTAP2_HUMAN(pre=R,post=S);sp|P11137-2|MTAP2_HUMAN(pre=R,post=S);sp|P11137-3|MTAP2_HUMAN(pre=R,post=S);sp|P11137-4|MTAP2_HUMAN(pre=R,post=S)	3	716.696	1	0	7	3	10	2	1	3	0	0.999944	1	Valid
119	20160312_03_A2.13221.13221.2 File:"20160312_03_A2.raw", NativeID:"controllerType=0 controllerNumber=1 scan=13221"	MER+0.984LQAWMTRM+15.995C+57.021R	MErLQAWMTRmcR	sp|Q9Y5X1|SNX9_HUMAN(pre=R,post=H)	2	893.405	1	0	1	1	2	4	0	4	0	0.932918	1	Valid
120	20160312_03_A2.13348.13348.2 File:"20160312_03_A2.raw", NativeID:"controllerType=0 controllerNumber=1 scan=13348"	EPAAPVSIQR+0.984SAPGGGGK	EPAAPVSIQrSAPGGGGK	sp|Q14847|LASP1_HUMAN(pre=K,post=R);sp|Q14847-3|LASP1_HUMAN(pre=K,post=R)	2	840.44	1	0	6	1	7	0	0	0	0	0.99264	1	Valid
121	20160312_03_A2.13733.13733.3 File:"20160312_03_A2.raw", NativeID:"controllerType=0 controllerNumber=1 scan=13733"	PYLPMGEASR+0.984PEESR	PYLPMGEASrPEESR	sp|Q14161|GIT2_HUMAN(pre=K,post=M);sp|Q14161-3|GIT2_HUMAN(pre=K,post=M);sp|Q14161-4|GIT2_HUMAN(pre=K,post=M);sp|Q14161-5|GIT2_HUMAN(pre=K,post=M);sp|Q14161-8|GIT2_HUMAN(pre=K,post=M);sp|Q14161-9|GIT2_HUMAN(pre=K,post=M);sp|Q14161-10|GIT2_HUMAN(pre=K,post=M);tr|F8WAK2|F8WAK2_HUMAN(pre=K,post=M);tr|F8VXI9|F8VXI9_HUMAN(pre=K,post=M);tr|R4GNG3|R4GNG3_HUMAN(pre=K,post=M)	3	573.939	1	0	3	0	3	0	0	0	0	0.731196	1	Valid
122	20160312_03_A2.13945.13945.2 File:"20160312_03_A2.raw", NativeID:"controllerType=0 controllerNumber=1 scan=13945"	SR+0.984LASVSADAEVAR	SrLASVSADAEVAR	sp|P11137|MTAP2_HUMAN(pre=R,post=R);sp|P11137-3|MTAP2_HUMAN(pre=R,post=R)	2	716.874	1	0	3	0	3	0	0	0	0	0.731196	1	Valid
123	20160312_03_A2.14170.14170.2 File:"20160312_03_A2.raw", NativeID:"controllerType=0 controllerNumber=1 scan=14170"	GAEGQR+0.984PGFGYGGR+0.984ASDYK	GAEGQrPGFGYGGrASDYK	tr|H7BYR8|H7BYR8_HUMAN(pre=K,post=S);sp|P02686-4|MBP_HUMAN(pre=K,post=S);sp|P02686-6|MBP_HUMAN(pre=K,post=S)	2	987.951	2	0	11	10	21	4	4	8	0	1	1	Valid
124	20160312_03_A2.14172.14172.3 File:"20160312_03_A2.raw", NativeID:"controllerType=0 controllerNumber=1 scan=14172"	GAEGQR+0.984PGFGYGGR+0.984ASDYK	GAEGQrPGFGYGGrASDYK	tr|H7BYR8|H7BYR8_HUMAN(pre=K,post=S);sp|P02686-4|MBP_HUMAN(pre=K,post=S);sp|P02686-6|MBP_HUMAN(pre=K,post=S)	3	658.97	2	0	5	7	12	2	2	4	0	0.999996	1	Valid
125	20160312_03_A2.14985.14985.3 File:"20160312_03_A2.raw", NativeID:"controllerType=0 controllerNumber=1 scan=14985"	KDSRWGDR+0.984DSEGTWR	KDSRWGDrDSEGTWR	sp|Q14152|EIF3A_HUMAN(pre=R,post=K);sp|Q14152-2|EIF3A_HUMAN(pre=R,post=K)	3	617.951	1	0	0	1	1	0	0	0	0	0.278664	0	Valid
126	20160312_03_A2.15003.15003.3 File:"20160312_03_A2.raw", NativeID:"controllerType=0 controllerNumber=1 scan=15003"	DSLR+0.984STPSHGSVSSLNSTGSLSPK	DSLrSTPSHGSVSSLNSTGSLSPK	sp|Q9UBC2|EP15R_HUMAN(pre=K,post=H);sp|Q9UBC2-2|EP15R_HUMAN(pre=K,post=H);sp|Q9UBC2-3|EP15R_HUMAN(pre=K,post=H);sp|Q9UBC2-4|EP15R_HUMAN(pre=K,post=H);tr|M0R165|M0R165_HUMAN(pre=K,post=H);tr|M0R2S2|M0R2S2_HUMAN(pre=K,post=H)	3	801.399	1	0	4	1	5	2	0	2	0	0.986023	1	Valid
127	20160312_03_A2.15379.15379.3 File:"20160312_03_A2.raw", NativeID:"controllerType=0 controllerNumber=1 scan=15379"	DASPGR+0.984GSHGQTPSPGALPLGR	DASPGrGSHGQTPSPGALPLGR	sp|P17600|SYN1_HUMAN(pre=R,post=Q);sp|P17600-2|SYN1_HUMAN(pre=R,post=Q)	3	706.023	1	0	1	0	1	0	0	0	0	0.278664	0	Valid
128	20160312_03_A2.15430.15430.3 File:"20160312_03_A2.raw", NativeID:"controllerType=0 controllerNumber=1 scan=15430"	GGGGNFGPGPGSNFR+0.984GGSDGYGSGR	GGGGNFGPGPGSNFrGGSDGYGSGR	sp|P22626|ROA2_HUMAN(pre=R,post=G);sp|P22626-2|ROA2_HUMAN(pre=R,post=G)	3	757.997	1	0	3	4	7	1	0	1	0	0.996151	1	Valid
129	20160312_03_A2.15456.15456.2 File:"20160312_03_A2.raw", NativeID:"controllerType=0 controllerNumber=1 scan=15456"	GGGGNFGPGPGSNFR+0.984GGSDGYGSGR	GGGGNFGPGPGSNFrGGSDGYGSGR	sp|P22626|ROA2_HUMAN(pre=R,post=G);sp|P22626-2|ROA2_HUMAN(pre=R,post=G)	2	1136.49	1	2	10	5	17	0	0	0	0	1	1	Valid
130	20160312_03_A2.15546.15546.3 File:"20160312_03_A2.raw", NativeID:"controllerType=0 controllerNumber=1 scan=15546"	YLATASTMDHAR+0.984HGFLPR+0.984HR	YLATASTMDHArHGFLPrHR	tr|H7BYR8|H7BYR8_HUMAN(pre=K,post=D);sp|P02686|MBP_HUMAN(pre=K,post=D);sp|P02686-2|MBP_HUMAN(pre=K,post=D);sp|P02686-3|MBP_HUMAN(pre=K,post=D);sp|P02686-4|MBP_HUMAN(pre=K,post=D);sp|P02686-5|MBP_HUMAN(pre=K,post=D);sp|P02686-6|MBP_HUMAN(pre=K,post=D);tr|E9PKX9|E9PKX9_HUMAN(pre=K,post=D);tr|J3QL64|J3QL64_HUMAN(pre=K,post=D);tr|J3KT34|J3KT34_HUMAN(pre=K,post=D);tr|J3QKL5|J3QKL5_HUMAN(pre=K,post=D);…	3	780.387	2	0	4	1	5	0	0	0	0	0.950382	1	Valid
131	20160312_03_A2.15572.15572.4 File:"20160312_03_A2.raw", NativeID:"controllerType=0 controllerNumber=1 scan=15572"	YLATASTMDHAR+0.984HGFLPR+0.984HR	YLATASTMDHArHGFLPrHR	tr|H7BYR8|H7BYR8_HUMAN(pre=K,post=D);sp|P02686|MBP_HUMAN(pre=K,post=D);sp|P02686-2|MBP_HUMAN(pre=K,post=D);sp|P02686-3|MBP_HUMAN(pre=K,post=D);sp|P02686-4|MBP_HUMAN(pre=K,post=D);sp|P02686-5|MBP_HUMAN(pre=K,post=D);sp|P02686-6|MBP_HUMAN(pre=K,post=D);tr|E9PKX9|E9PKX9_HUMAN(pre=K,post=D);tr|J3QL64|J3QL64_HUMAN(pre=K,post=D);tr|J3KT34|J3KT34_HUMAN(pre=K,post=D);tr|J3QKL5|J3QKL5_HUMAN(pre=K,post=D);…	4	585.543	2	0	12	8	20	1	1	2	0	1	1	Valid
132	20160312_03_A2.15855.15855.3 File:"20160312_03_A2.raw", NativeID:"controllerType=0 controllerNumber=1 scan=15855"	QTTAAAAATFSEQVGGGSGGAGR+0.984GGAASR	QTTAAAAATFSEQVGGGSGGAGrGGAASR	sp|P17600|SYN1_HUMAN(pre=K,post=V);sp|P17600-2|SYN1_HUMAN(pre=K,post=V)	3	851.408	1	0	1	0	1	0	0	0	0	0.278664	0	Valid
133	20160312_03_A2.15930.15930.3 File:"20160312_03_A2.raw", NativeID:"controllerType=0 controllerNumber=1 scan=15930"	R+0.984NLDIERPTYTNLNR	rNLDIERPTYTNLNR	sp|Q6PEY2|TBA3E_HUMAN(pre=R,post=L);sp|P0DPH7|TBA3C_HUMAN(pre=R,post=L);sp|P0DPH7-2|TBA3C_HUMAN(pre=R,post=L);sp|Q9NY65|TBA8_HUMAN(pre=R,post=L);sp|Q9NY65-2|TBA8_HUMAN(pre=R,post=L);sp|P68363|TBA1B_HUMAN(pre=R,post=L);sp|Q9BQE3|TBA1C_HUMAN(pre=R,post=L);sp|P0DPH8|TBA3D_HUMAN(pre=R,post=L);sp|Q71U36|TBA1A_HUMAN(pre=R,post=L);sp|Q71U36-2|TBA1A_HUMAN(pre=R,post=L);sp|P68366|TBA4A_HUMAN(pre=R,post=L)…	3	625.994	1	0	2	0	2	0	0	0	0	0.5062	1	Valid
134	20160312_03_A2.15933.15933.2 File:"20160312_03_A2.raw", NativeID:"controllerType=0 controllerNumber=1 scan=15933"	R+0.984NLDIERPTYTNLNR	rNLDIERPTYTNLNR	sp|Q6PEY2|TBA3E_HUMAN(pre=R,post=L);sp|P0DPH7|TBA3C_HUMAN(pre=R,post=L);sp|P0DPH7-2|TBA3C_HUMAN(pre=R,post=L);sp|Q9NY65|TBA8_HUMAN(pre=R,post=L);sp|Q9NY65-2|TBA8_HUMAN(pre=R,post=L);sp|P68363|TBA1B_HUMAN(pre=R,post=L);sp|Q9BQE3|TBA1C_HUMAN(pre=R,post=L);sp|P0DPH8|TBA3D_HUMAN(pre=R,post=L);sp|Q71U36|TBA1A_HUMAN(pre=R,post=L);sp|Q71U36-2|TBA1A_HUMAN(pre=R,post=L);sp|P68366|TBA4A_HUMAN(pre=R,post=L)…	2	938.488	1	2	4	0	6	0	0	0	0	0.980705	1	Valid
135	20160312_03_A2.15968.15968.2 File:"20160312_03_A2.raw", NativeID:"controllerType=0 controllerNumber=1 scan=15968"	R+0.984SM+15.995VSTSGAATASSAAGPSR	rSmVSTSGAATASSAAGPSR	tr|F5H037|F5H037_HUMAN(pre=R,post=G);tr|F5H1L6|F5H1L6_HUMAN(pre=R,post=G)	2	934.943	1	0	1	0	1	0	0	0	0	0.278664	0	Ambiguous
136	20160312_03_A2.16523.16523.3 File:"20160312_03_A2.raw", NativeID:"controllerType=0 controllerNumber=1 scan=16523"	RFIQQFSQ+0.984C+57.021KATAR+0.984N+0.984LK	RFIQQFSqcKATArnLK	sp|O60674|JAK2_HUMAN(pre=R,post=L);tr|A0A1B0GTR9|A0A1B0GTR9_HUMAN(pre=R,post=L)	3	700.362	1	0	0	1	1	0	0	0	0	0.278664	0	Valid
137	20160312_03_A2.17171.17171.3 File:"20160312_03_A2.raw", NativeID:"controllerType=0 controllerNumber=1 scan=17171"	GSGQVVAQQR+0.984DVAHLGPDPQPPYSR	GSGQVVAQQrDVAHLGPDPQPPYSR	tr|A0A1C7CYX9|A0A1C7CYX9_HUMAN(pre=R,post=Q)	3	887.445	1	0	1	0	1	1	0	1	0	0.425753	0	Valid
138	20160312_03_A2.17672.17672.3 File:"20160312_03_A2.raw", NativeID:"controllerType=0 controllerNumber=1 scan=17672"	Q+0.984AEDR+0.984C+57.021KQLEEEQQALQK	qAEDrcKQLEEEQQALQK	sp|P07951|TPM2_HUMAN(pre=K,post=K);sp|P07951-2|TPM2_HUMAN(pre=K,post=K);tr|Q5TCU8|Q5TCU8_HUMAN(pre=K,post=K);tr|A7XZE4|A7XZE4_HUMAN(pre=K,post=K);tr|Q5TCU3|Q5TCU3_HUMAN(pre=K,post=K)	3	745.019	1	0	0	0	0	0	0	0	0	0.127083	0	Valid
139	20160312_03_A2.17941.17941.4 File:"20160312_03_A2.raw", NativeID:"controllerType=0 controllerNumber=1 scan=17941"	TIEAHSR+0.984MVIPGGIDVHTR	TIEAHSrMVIPGGIDVHTR	sp|Q16555|DPYL2_HUMAN(pre=K,post=F);sp|Q16555-2|DPYL2_HUMAN(pre=K,post=F);tr|E5RFU4|E5RFU4_HUMAN(pre=K,post=F);tr|A0A1C7CYX9|A0A1C7CYX9_HUMAN(pre=K,post=F)	4	523.276	1	0	7	7	14	0	0	0	0	0.999992	1	Valid
140	20160312_03_A2.18622.18622.3 File:"20160312_03_A2.raw", NativeID:"controllerType=0 controllerNumber=1 scan=18622"	LAAGHELQPLAIVDQRPSSR+0.984ASSR	LAAGHELQPLAIVDQRPSSrASSR	sp|P17302|CXA1_HUMAN(pre=K,post=A)	3	854.125	1	2	15	0	17	0	0	0	0	1	1	Valid
141	20160312_03_A2.18633.18633.4 File:"20160312_03_A2.raw", NativeID:"controllerType=0 controllerNumber=1 scan=18633"	LAAGHELQPLAIVDQRPSSR+0.984ASSR	LAAGHELQPLAIVDQRPSSrASSR	sp|P17302|CXA1_HUMAN(pre=K,post=A)	4	640.846	1	0	8	0	8	0	0	0	0	0.997214	1	Valid
142	20160312_03_A2.18736.18736.3 File:"20160312_03_A2.raw", NativeID:"controllerType=0 controllerNumber=1 scan=18736"	NKDDLTLSR+0.984SLGLGGR	NKDDLTLSrSLGLGGR	sp|P11137|MTAP2_HUMAN(pre=K,post=S);sp|P11137-3|MTAP2_HUMAN(pre=K,post=S)	3	568.308	1	0	2	1	3	3	1	4	0	0.973617	1	Valid
143	20160312_03_A2.18896.18896.4 File:"20160312_03_A2.raw", NativeID:"controllerType=0 controllerNumber=1 scan=18896"	GAAVDFTAR+0.984NGITPLHVASK	GAAVDFTArNGITPLHVASK	sp|Q01484|ANK2_HUMAN(pre=R,post=R);sp|Q01484-2|ANK2_HUMAN(pre=R,post=R);sp|Q01484-5|ANK2_HUMAN(pre=R,post=R);tr|B7Z651|B7Z651_HUMAN(pre=R,post=R);tr|A0A0U1RQN6|A0A0U1RQN6_HUMAN(pre=R,post=R);tr|E9PHW9|E9PHW9_HUMAN(pre=R,post=R);tr|D6RHE1|D6RHE1_HUMAN(pre=R,post=R);tr|I6L894|I6L894_HUMAN(pre=R,post=R)	4	507.274	1	0	0	0	0	0	0	0	0	0.127083	0	Ambiguous
144	20160312_03_A2.18913.18913.4 File:"20160312_03_A2.raw", NativeID:"controllerType=0 controllerNumber=1 scan=18913"	NGLHR+0.984PVSTDFAQYNSYGDVSGGVR	NGLHrPVSTDFAQYNSYGDVSGGVR	sp|O14639|ABLM1_HUMAN(pre=R,post=D);sp|O14639-2|ABLM1_HUMAN(pre=R,post=D);sp|O14639-3|ABLM1_HUMAN(pre=R,post=D);sp|O14639-4|ABLM1_HUMAN(pre=R,post=D);sp|O14639-5|ABLM1_HUMAN(pre=R,post=D);sp|O14639-6|ABLM1_HUMAN(pre=R,post=D);tr|A0A0A0MRL6|A0A0A0MRL6_HUMAN(pre=R,post=D);tr|F8W8M4|F8W8M4_HUMAN(pre=R,post=D);tr|J3QSX6|J3QSX6_HUMAN(pre=R,post=D);tr|A0A3B3IS55|A0A3B3IS55_HUMAN(pre=R,post=D)	4	675.072	1	0	1	2	3	0	0	0	0	0.731196	1	Valid
145	20160312_03_A2.19804.19804.4 File:"20160312_03_A2.raw", NativeID:"controllerType=0 controllerNumber=1 scan=19804"	NGLHR+0.984PVSTDFAQYN+0.984SYGDVSGGVR	NGLHrPVSTDFAQYnSYGDVSGGVR	sp|O14639|ABLM1_HUMAN(pre=R,post=D);sp|O14639-2|ABLM1_HUMAN(pre=R,post=D);sp|O14639-3|ABLM1_HUMAN(pre=R,post=D);sp|O14639-4|ABLM1_HUMAN(pre=R,post=D);sp|O14639-5|ABLM1_HUMAN(pre=R,post=D);sp|O14639-6|ABLM1_HUMAN(pre=R,post=D);tr|A0A0A0MRL6|A0A0A0MRL6_HUMAN(pre=R,post=D);tr|F8W8M4|F8W8M4_HUMAN(pre=R,post=D);tr|J3QSX6|J3QSX6_HUMAN(pre=R,post=D);tr|A0A3B3IS55|A0A3B3IS55_HUMAN(pre=R,post=D)	4	675.318	1	0	0	0	0	0	0	0	0	0.127083	0	Ambiguous
146	20160312_03_A2.20244.20244.3 File:"20160312_03_A2.raw", NativeID:"controllerType=0 controllerNumber=1 scan=20244"	NLHQSGFSLSGAQIDDNIPR+0.984R+0.984TTQR	NLHQSGFSLSGAQIDDNIPrrTTQR	sp|Q16555|DPYL2_HUMAN(pre=R,post=I);sp|Q16555-2|DPYL2_HUMAN(pre=R,post=I);tr|A0A1C7CYX9|A0A1C7CYX9_HUMAN(pre=R,post=I)	3	938.47	2	0	4	2	6	1	0	1	0	0.989852	1	Valid
147	20160312_03_A2.21281.21281.4 File:"20160312_03_A2.raw", NativeID:"controllerType=0 controllerNumber=1 scan=21281"	QLFHPEQLITGKEDAANNYAR+0.984GHYTIGK	QLFHPEQLITGKEDAANNYArGHYTIGK	sp|P0DPH7|TBA3C_HUMAN(pre=R,post=E);sp|P0DPH7-2|TBA3C_HUMAN(pre=R,post=E);sp|P68363|TBA1B_HUMAN(pre=R,post=E);sp|Q9BQE3|TBA1C_HUMAN(pre=R,post=E);sp|P0DPH8|TBA3D_HUMAN(pre=R,post=E);sp|Q71U36|TBA1A_HUMAN(pre=R,post=E);sp|Q71U36-2|TBA1A_HUMAN(pre=R,post=E);sp|P68366|TBA4A_HUMAN(pre=R,post=E);sp|P68366-2|TBA4A_HUMAN(pre=R,post=E);tr|F8VVB9|F8VVB9_HUMAN(pre=R,post=E);tr|F5H5D3|F5H5D3_HUMAN(pre=R,pos…	4	793.901	1	0	0	0	0	0	0	0	0	0.127083	0	Valid
148	20160312_03_A2.21379.21379.4 File:"20160312_03_A2.raw", NativeID:"controllerType=0 controllerNumber=1 scan=21379"	LDIQ+0.984LPIISDDFKFQ+0.984VWR+0.984KMFR+0.984	LDIqLPIISDDFKFqVWrKMFr	sp|Q6ZMU5|TRI72_HUMAN(pre=R,post=A)	4	700.617	2	0	1	2	3	0	0	0	0	0.731196	1	Valid
149	20160312_03_A2.21563.21563.3 File:"20160312_03_A2.raw", NativeID:"controllerType=0 controllerNumber=1 scan=21563"	R+0.984GTGGVDTAAVGGVFDVSNADR	rGTGGVDTAAVGGVFDVSNADR	sp|P12277|KCRB_HUMAN(pre=K,post=L);tr|H0YJG0|H0YJG0_HUMAN(pre=K,post=L)	3	708.011	1	0	0	0	0	0	0	0	0	0.127083	0	Ambiguous
150	20160312_03_A2.21849.21849.2 File:"20160312_03_A2.raw", NativeID:"controllerType=0 controllerNumber=1 scan=21849"	NHPAQ+0.984AR+0.984SLVEAPVSTFPQR	NHPAqArSLVEAPVSTFPQR	sp|Q5VYM1|CI131_HUMAN(pre=K,post=S);sp|Q5VYM1-2|CI131_HUMAN(pre=K,post=S);sp|Q5VYM1-3|CI131_HUMAN(pre=K,post=S)	2	1104.06	1	0	1	0	1	0	0	0	0	0.278664	0	Valid
151	20160312_03_A2.22707.22707.3 File:"20160312_03_A2.raw", NativeID:"controllerType=0 controllerNumber=1 scan=22707"	QQAPPVR+0.984NLHQSGFSLSGAQIDDNIPR	QQAPPVrNLHQSGFSLSGAQIDDNIPR	sp|Q16555|DPYL2_HUMAN(pre=K,post=R);sp|Q16555-2|DPYL2_HUMAN(pre=K,post=R);tr|A0A1C7CYX9|A0A1C7CYX9_HUMAN(pre=K,post=R)	3	982.833	1	1	2	3	6	0	1	1	0	0.989852	1	Valid
152	20160312_03_A2.22754.22754.4 File:"20160312_03_A2.raw", NativeID:"controllerType=0 controllerNumber=1 scan=22754"	QQAPPVR+0.984NLHQSGFSLSGAQIDDNIPR	QQAPPVrNLHQSGFSLSGAQIDDNIPR	sp|Q16555|DPYL2_HUMAN(pre=K,post=R);sp|Q16555-2|DPYL2_HUMAN(pre=K,post=R);tr|A0A1C7CYX9|A0A1C7CYX9_HUMAN(pre=K,post=R)	4	737.376	1	0	0	0	0	0	0	0	0	0.127083	0	Ambiguous
153	20160312_03_A2.22757.22757.4 File:"20160312_03_A2.raw", NativeID:"controllerType=0 controllerNumber=1 scan=22757"	TGTYR+0.984QLFHPEQLITGKEDAANNYAR	TGTYrQLFHPEQLITGKEDAANNYAR	sp|P0DPH7|TBA3C_HUMAN(pre=R,post=G);sp|P0DPH7-2|TBA3C_HUMAN(pre=R,post=G);sp|P68363|TBA1B_HUMAN(pre=R,post=G);sp|P68363-2|TBA1B_HUMAN(pre=R,post=G);sp|Q9BQE3|TBA1C_HUMAN(pre=R,post=G);sp|P0DPH8|TBA3D_HUMAN(pre=R,post=G);sp|Q71U36|TBA1A_HUMAN(pre=R,post=G);sp|Q71U36-2|TBA1A_HUMAN(pre=R,post=G);tr|F8VVB9|F8VVB9_HUMAN(pre=R,post=G);tr|F5H5D3|F5H5D3_HUMAN(pre=R,post=G);tr|F8VQQ4|F8VQQ4_HUMAN(pre=R,po…	4	749.374	1	0	1	2	3	2	1	3	0	0.950565	1	Valid
154	20160312_03_A2.22785.22785.3 File:"20160312_03_A2.raw", NativeID:"controllerType=0 controllerNumber=1 scan=22785"	TGTYR+0.984QLFHPEQLITGKEDAANNYAR	TGTYrQLFHPEQLITGKEDAANNYAR	sp|P0DPH7|TBA3C_HUMAN(pre=R,post=G);sp|P0DPH7-2|TBA3C_HUMAN(pre=R,post=G);sp|P68363|TBA1B_HUMAN(pre=R,post=G);sp|P68363-2|TBA1B_HUMAN(pre=R,post=G);sp|Q9BQE3|TBA1C_HUMAN(pre=R,post=G);sp|P0DPH8|TBA3D_HUMAN(pre=R,post=G);sp|Q71U36|TBA1A_HUMAN(pre=R,post=G);sp|Q71U36-2|TBA1A_HUMAN(pre=R,post=G);tr|F8VVB9|F8VVB9_HUMAN(pre=R,post=G);tr|F5H5D3|F5H5D3_HUMAN(pre=R,post=G);tr|F8VQQ4|F8VQQ4_HUMAN(pre=R,po…	3	998.829	1	0	4	1	5	2	0	2	0	0.986023	1	Valid
155	20160312_03_A2.2418.2418.2 File:"20160312_03_A2.raw", NativeID:"controllerType=0 controllerNumber=1 scan=2418"	SPAR+0.984SPATGR	SPArSPATGR	sp|Q14CZ8|HECAM_HUMAN(pre=R,post=T)	2	500.763	1	0	4	3	7	1	1	2	0	0.997991	1	Valid
156	20160312_03_A2.24895.24895.4 File:"20160312_03_A2.raw", NativeID:"controllerType=0 controllerNumber=1 scan=24895"	ARQ+0.984EGSSPEPVEGLAR+0.984DGPR	ARqEGSSPEPVEGLArDGPR	sp|Q9BXH1|BBC3_HUMAN(pre=R,post=P)	4	528.26	1	0	1	0	1	0	0	0	0	0.278664	0	Valid
157	20160312_03_A2.25910.25910.4 File:"20160312_03_A2.raw", NativeID:"controllerType=0 controllerNumber=1 scan=25910"	ELQEQLAR+0.984QQVHVELDVAKPDLTAALK	ELQEQLArQQVHVELDVAKPDLTAALK	sp|P14136|GFAP_HUMAN(pre=R,post=E);sp|P14136-2|GFAP_HUMAN(pre=R,post=E);sp|P14136-3|GFAP_HUMAN(pre=R,post=E);tr|K7EMP8|K7EMP8_HUMAN(pre=R,post=E);tr|K7EKH9|K7EKH9_HUMAN(pre=R,post=E);tr|A0A1X7SCE1|A0A1X7SCE1_HUMAN(pre=R,post=E);tr|A0A1W2PRT3|A0A1W2PRT3_HUMAN(pre=R,post=E);tr|A0A1X7SBR3|A0A1X7SBR3_HUMAN(pre=R,post=E);tr|A0A1W2PR46|A0A1W2PR46_HUMAN(pre=R,post=E)	4	761.667	1	0	0	0	0	0	0	0	0	0.127083	0	Ambiguous
158	20160312_03_A2.2608.2608.2 File:"20160312_03_A2.raw", NativeID:"controllerType=0 controllerNumber=1 scan=2608"	EVQEMR+0.984NK	EVQEMrNK	sp|P35611|ADDA_HUMAN(pre=K,post=I);sp|P35611-2|ADDA_HUMAN(pre=K,post=I);sp|P35611-3|ADDA_HUMAN(pre=K,post=I);sp|P35611-4|ADDA_HUMAN(pre=K,post=I);sp|P35611-6|ADDA_HUMAN(pre=K,post=I);tr|E7ENY0|E7ENY0_HUMAN(pre=K,post=I);tr|H0Y9H2|H0Y9H2_HUMAN(pre=K,post=I);tr|E7EV99|E7EV99_HUMAN(pre=K,post=I)	2	517.751	1	0	5	2	7	1	0	1	0	0.996151	1	Valid
159	20160312_03_A2.26235.26235.5 File:"20160312_03_A2.raw", NativeID:"controllerType=0 controllerNumber=1 scan=26235"	HLHAILGPM+15.995LLNR+0.984PLDGVTNSLPSPEQLK	HLHAILGPmLLNrPLDGVTNSLPSPEQLK	sp|P51178|PLCD1_HUMAN(pre=R,post=G);sp|P51178-2|PLCD1_HUMAN(pre=R,post=G)	5	636.348	1	0	0	0	0	0	0	0	0	0.127083	0	Ambiguous
160	20160312_03_A2.26293.26293.3 File:"20160312_03_A2.raw", NativeID:"controllerType=0 controllerNumber=1 scan=26293"	ISEELTDVDSPLPHYR+0.984VEPSLEGALTK	ISEELTDVDSPLPHYrVEPSLEGALTK	sp|Q8TAM6|ERMIN_HUMAN(pre=K,post=G);sp|Q8TAM6-2|ERMIN_HUMAN(pre=K,post=G);tr|B8ZZ94|B8ZZ94_HUMAN(pre=K,post=G);tr|B4DIZ1|B4DIZ1_HUMAN(pre=K,post=G);tr|F8WAQ2|F8WAQ2_HUMAN(pre=K,post=G);tr|C9J6B4|C9J6B4_HUMAN(pre=K,post=G);tr|C9J8X3|C9J8X3_HUMAN(pre=K,post=G);tr|C9JN04|C9JN04_HUMAN(pre=K,post=G)	3	999.509	1	0	12	4	16	0	0	0	0	0.999999	1	Valid
161	20160312_03_A2.27245.27245.3 File:"20160312_03_A2.raw", NativeID:"controllerType=0 controllerNumber=1 scan=27245"	HVPR+0.984AVFVDLEPTVIDEVR	HVPrAVFVDLEPTVIDEVR	sp|P68363|TBA1B_HUMAN(pre=K,post=T);sp|P68363-2|TBA1B_HUMAN(pre=K,post=T);sp|Q9BQE3|TBA1C_HUMAN(pre=K,post=T);sp|Q71U36|TBA1A_HUMAN(pre=K,post=T);sp|Q71U36-2|TBA1A_HUMAN(pre=K,post=T);tr|F8VVB9|F8VVB9_HUMAN(pre=K,post=T);tr|F5H5D3|F5H5D3_HUMAN(pre=K,post=T);tr|F8VQQ4|F8VQQ4_HUMAN(pre=K,post=T);tr|F8VX09|F8VX09_HUMAN(pre=K,post=T);tr|F8VRK0|F8VRK0_HUMAN(pre=K,post=T);tr|F8VRZ4|F8VRZ4_HUMAN(pre=K,p…	3	731.396	1	0	7	3	10	2	1	3	0	0.999944	1	Valid
162	20160312_03_A2.27528.27528.3 File:"20160312_03_A2.raw", NativeID:"controllerType=0 controllerNumber=1 scan=27528"	QNGR+0.984DPPDPYVSLLLLPDK	QNGrDPPDPYVSLLLLPDK	sp|Q9BSJ8|ESYT1_HUMAN(pre=R,post=N);sp|Q9BSJ8-2|ESYT1_HUMAN(pre=R,post=N)	3	713.376	1	0	0	0	0	0	0	0	0	0.127083	0	Ambiguous
163	20160312_03_A2.28090.28090.3 File:"20160312_03_A2.raw", NativeID:"controllerType=0 controllerNumber=1 scan=28090"	QNGR+0.984DPPDPYVSLLLLPDK	QNGrDPPDPYVSLLLLPDK	sp|Q9BSJ8|ESYT1_HUMAN(pre=R,post=N);sp|Q9BSJ8-2|ESYT1_HUMAN(pre=R,post=N)	3	713.376	1	0	1	1	2	0	0	0	0	0.5062	1	Valid
164	20160312_03_A2.28467.28467.3 File:"20160312_03_A2.raw", NativeID:"controllerType=0 controllerNumber=1 scan=28467"	NVTESPSFSAGDNPPVLFSSDFR+0.984ISGAPEK	NVTESPSFSAGDNPPVLFSSDFrISGAPEK	sp|P20916|MAG_HUMAN(pre=K,post=Y);sp|P20916-2|MAG_HUMAN(pre=K,post=Y);sp|P20916-3|MAG_HUMAN(pre=K,post=Y)	3	1051.84	1	0	4	0	4	0	0	0	0	0.878318	1	Valid
165	20160312_03_A2.28612.28612.3 File:"20160312_03_A2.raw", NativeID:"controllerType=0 controllerNumber=1 scan=28612"	GVVDSEDLPLNISR+0.984EMLQQSK	GVVDSEDLPLNISrEMLQQSK	sp|P08238|HS90B_HUMAN(pre=R,post=I);sp|P07900|HS90A_HUMAN(pre=R,post=I);sp|P07900-2|HS90A_HUMAN(pre=R,post=I)	3	787.066	1	0	1	0	1	0	0	0	0	0.278664	0	Valid
166	20160312_03_A2.28627.28627.2 File:"20160312_03_A2.raw", NativeID:"controllerType=0 controllerNumber=1 scan=28627"	GVVDSEDLPLNISR+0.984EMLQQSK	GVVDSEDLPLNISrEMLQQSK	sp|P08238|HS90B_HUMAN(pre=R,post=I);sp|P07900|HS90A_HUMAN(pre=R,post=I);sp|P07900-2|HS90A_HUMAN(pre=R,post=I)	2	1180.09	1	0	1	0	1	0	0	0	0	0.278664	0	Ambiguous
167	20160312_03_A2.29159.29159.5 File:"20160312_03_A2.raw", NativeID:"controllerType=0 controllerNumber=1 scan=29159"	QVVEEIFHPER+0.984PDSVDIEHMSSGLTDLLK	QVVEEIFHPErPDSVDIEHMSSGLTDLLK	sp|Q8WU76|SCFD2_HUMAN(pre=K,post=T)	5	665.133	1	0	0	0	0	0	0	0	0	0.127083	0	Ambiguous
168	20160312_03_A2.30241.30241.3 File:"20160312_03_A2.raw", NativeID:"controllerType=0 controllerNumber=1 scan=30241"	DIGTAIQ+0.984FLHSHN+0.984IAHR+0.984DVKPEN+0.984LLYTSK	DIGTAIqFLHSHnIAHrDVKPEnLLYTSK	sp|Q16644|MAPK3_HUMAN(pre=R,post=E);tr|C9J8E1|C9J8E1_HUMAN(pre=R,post=E)	3	1107.9	1	0	0	0	0	1	0	1	0	0.218385	0	Valid
169	20160312_03_A2.30612.30612.4 File:"20160312_03_A2.raw", NativeID:"controllerType=0 controllerNumber=1 scan=30612"	QKFQPYPM+15.995EDITVVITLC+57.021R+0.984ILDAFFDFMGK	QKFQPYPmEDITVVITLcrILDAFFDFMGK	sp|Q0VDD8|DYH14_HUMAN(pre=R,post=N);sp|Q0VDD8-4|DYH14_HUMAN(pre=R,post=N)	4	910.704	1	0	1	1	2	0	0	0	0	0.5062	1	Valid
170	20160312_03_A2.30614.30614.5 File:"20160312_03_A2.raw", NativeID:"controllerType=0 controllerNumber=1 scan=30614"	QKFQPYPM+15.995EDITVVITLC+57.021R+0.984ILDAFFDFMGK	QKFQPYPmEDITVVITLcrILDAFFDFMGK	sp|Q0VDD8|DYH14_HUMAN(pre=R,post=N);sp|Q0VDD8-4|DYH14_HUMAN(pre=R,post=N)	5	728.765	1	0	1	1	2	0	0	0	0	0.5062	1	Valid
171	20160312_03_A2.30783.30783.5 File:"20160312_03_A2.raw", NativeID:"controllerType=0 controllerNumber=1 scan=30783"	QKFQPYPM+15.995EDITVVITLC+57.021R+0.984ILDAFFDFMGK	QKFQPYPmEDITVVITLcrILDAFFDFMGK	sp|Q0VDD8|DYH14_HUMAN(pre=R,post=N);sp|Q0VDD8-4|DYH14_HUMAN(pre=R,post=N)	5	728.765	1	0	0	0	0	0	0	0	0	0.127083	0	Valid
172	20160312_03_A2.31278.31278.2 File:"20160312_03_A2.raw", NativeID:"controllerType=0 controllerNumber=1 scan=31278"	SR+0.984SISLR+0.984R+0.984SR	SrSISLrrSR	sp|Q16629|SRSF7_HUMAN(pre=R,post=S);sp|Q16629-4|SRSF7_HUMAN(pre=R,post=S);tr|H7C1N1|H7C1N1_HUMAN(pre=R,post=S);tr|H7BZZ6|H7BZZ6_HUMAN(pre=R,post=S);tr|C9JAB2|C9JAB2_HUMAN(pre=R,post=S)	2	610.839	3	0	3	2	5	1	0	1	0	0.973517	1	Valid
173	20160312_03_A2.31699.31699.3 File:"20160312_03_A2.raw", NativeID:"controllerType=0 controllerNumber=1 scan=31699"	AR+0.984NDEYENLFNMIVEIPR	ArNDEYENLFNMIVEIPR	sp|Q9H2U2|IPYR2_HUMAN(pre=K,post=W);sp|Q9H2U2-2|IPYR2_HUMAN(pre=K,post=W);sp|Q9H2U2-3|IPYR2_HUMAN(pre=K,post=W);tr|D6RAD3|D6RAD3_HUMAN(pre=K,post=W);tr|D6RGI1|D6RGI1_HUMAN(pre=K,post=W);tr|D6RGV9|D6RGV9_HUMAN(pre=K,post=W)	3	742.029	1	0	0	0	0	0	0	0	0	0.127083	0	Ambiguous
174	20160312_03_A2.3338.3338.2 File:"20160312_03_A2.raw", NativeID:"controllerType=0 controllerNumber=1 scan=3338"	TVTNDR+0.984SAPR	TVTNDrSAPR	sp|Q765P7|MTSSL_HUMAN(pre=R,post=I);tr|A0A087WXN9|A0A087WXN9_HUMAN(pre=R,post=I)	2	559.284	1	0	6	0	6	0	0	0	0	0.980705	1	Valid
175	20160312_03_A2.33915.33915.3 File:"20160312_03_A2.raw", NativeID:"controllerType=0 controllerNumber=1 scan=33915"	EAVAVDVAVPKR+0.984GPRAGK	EAVAVDVAVPKrGPRAGK	tr|H3BN70|H3BN70_HUMAN(pre=R,post=P)	3	607.683	1	0	0	0	0	0	0	0	0	0.127083	0	Ambiguous
176	20160312_03_A2.34797.34797.4 File:"20160312_03_A2.raw", NativeID:"controllerType=0 controllerNumber=1 scan=34797"	FWEVISDEHGIDPTGTYHGDSDLQLER+0.984	FWEVISDEHGIDPTGTYHGDSDLQLEr	sp|P04350|TBB4A_HUMAN(pre=K,post=I);sp|P68371|TBB4B_HUMAN(pre=K,post=I);tr|M0R0X0|M0R0X0_HUMAN(pre=K,post=I);tr|M0R278|M0R278_HUMAN(pre=K,post=I);tr|M0QY85|M0QY85_HUMAN(pre=K,post=I);tr|M0QX14|M0QX14_HUMAN(pre=K,post=I);tr|M0QY37|M0QY37_HUMAN(pre=K,post=I);tr|M0QZL7|M0QZL7_HUMAN(pre=K,post=I);tr|M0QYM7|M0QYM7_HUMAN(pre=K,post=I);tr|M0R2D3|M0R2D3_HUMAN(pre=K,post=I)	4	780.108	1	0	0	0	0	0	0	0	0	0.127083	0	Ambiguous
177	20160312_03_A2.3553.3553.2 File:"20160312_03_A2.raw", NativeID:"controllerType=0 controllerNumber=1 scan=3553"	SVSSSSYR+0.984R	SVSSSSYrR	sp|P08670|VIME_HUMAN(pre=R,post=M);tr|B0YJC4|B0YJC4_HUMAN(pre=R,post=M);tr|A0A1B0GVG8|A0A1B0GVG8_HUMAN(pre=R,post=M);tr|A0A1B0GTT5|A0A1B0GTT5_HUMAN(pre=R,post=M)	2	515.252	1	0	7	1	8	1	0	1	0	0.998546	1	Valid
178	20160312_03_A2.36103.36103.4 File:"20160312_03_A2.raw", NativeID:"controllerType=0 controllerNumber=1 scan=36103"	ILDLGITGPEGHVLSR+0.984PEEVEAEAVNR	ILDLGITGPEGHVLSrPEEVEAEAVNR	sp|Q16555|DPYL2_HUMAN(pre=R,post=A);sp|Q16555-2|DPYL2_HUMAN(pre=R,post=A);tr|A0A1C7CYX9|A0A1C7CYX9_HUMAN(pre=R,post=A)	4	726.13	1	0	2	0	2	0	0	0	0	0.5062	1	Valid
179	20160312_03_A2.3896.3896.2 File:"20160312_03_A2.raw", NativeID:"controllerType=0 controllerNumber=1 scan=3896"	VQDEYSR+0.984R	VQDEYSrR	sp|Q7L0J3|SV2A_HUMAN(pre=R,post=S);sp|Q7L0J3-2|SV2A_HUMAN(pre=R,post=S)	2	527.252	1	0	4	0	4	0	0	0	0	0.878318	1	Valid
180	20160312_03_A2.4374.4374.2 File:"20160312_03_A2.raw", NativeID:"controllerType=0 controllerNumber=1 scan=4374"	N+0.984SPR+0.984NQQKNK	nSPrNQQKNK	sp|Q6NZY4|ZCHC8_HUMAN(pre=K,post=K);sp|Q6NZY4-2|ZCHC8_HUMAN(pre=K,post=K)	2	608.308	1	0	1	0	1	0	0	0	0	0.278664	0	Valid
181	20160312_03_A2.4451.4451.2 File:"20160312_03_A2.raw", NativeID:"controllerType=0 controllerNumber=1 scan=4451"	DNPNR+0.984GNVNPR	DNPNrGNVNPR	sp|Q9Y6W5|WASF2_HUMAN(pre=K,post=K);sp|Q9Y6W5-2|WASF2_HUMAN(pre=K,post=K)	2	627.303	1	0	7	3	10	1	2	3	0	0.999944	1	Valid
182	20160312_03_A2.4902.4902.2 File:"20160312_03_A2.raw", NativeID:"controllerType=0 controllerNumber=1 scan=4902"	VEQEKR+0.984KKQ+0.984M+15.995EK	VEQEKrKKqmEK	sp|Q9NUV9|GIMA4_HUMAN(pre=K,post=K);tr|G5E9W9|G5E9W9_HUMAN(pre=K,post=K)	2	789.912	1	0	0	1	1	0	0	0	0	0.278664	0	Valid
183	20160312_03_A2.5324.5324.2 File:"20160312_03_A2.raw", NativeID:"controllerType=0 controllerNumber=1 scan=5324"	R+0.984TQEQISNVK	rTQEQISNVK	sp|O76041-2|NEBL_HUMAN(pre=K,post=Y)	2	602.321	1	0	1	0	1	0	0	0	0	0.278664	0	Valid
184	20160312_03_A2.5396.5396.3 File:"20160312_03_A2.raw", NativeID:"controllerType=0 controllerNumber=1 scan=5396"	LGGR+0.984DSRSGSPMAR	LGGrDSRSGSPMAR	tr|H7BYR8|H7BYR8_HUMAN(pre=K,post=R);sp|P02686|MBP_HUMAN(pre=K,post=R);sp|P02686-3|MBP_HUMAN(pre=K,post=R);sp|P02686-4|MBP_HUMAN(pre=K,post=R);sp|P02686-5|MBP_HUMAN(pre=K,post=R);sp|P02686-6|MBP_HUMAN(pre=K,post=R);tr|E9PJ72|E9PJ72_HUMAN(pre=K,post=R);tr|A8MZH3|A8MZH3_HUMAN(pre=K,post=R)	3	483.241	1	0	6	3	9	0	0	0	0	0.998948	1	Valid
185	20160312_03_A2.5812.5812.2 File:"20160312_03_A2.raw", NativeID:"controllerType=0 controllerNumber=1 scan=5812"	LGGRDSR+0.984SGSPMAR	LGGRDSrSGSPMAR	tr|H7BYR8|H7BYR8_HUMAN(pre=K,post=R);sp|P02686|MBP_HUMAN(pre=K,post=R);sp|P02686-3|MBP_HUMAN(pre=K,post=R);sp|P02686-4|MBP_HUMAN(pre=K,post=R);sp|P02686-5|MBP_HUMAN(pre=K,post=R);sp|P02686-6|MBP_HUMAN(pre=K,post=R);tr|E9PJ72|E9PJ72_HUMAN(pre=K,post=R);tr|A8MZH3|A8MZH3_HUMAN(pre=K,post=R)	2	724.358	1	2	8	1	11	0	0	0	0	0.99985	1	Valid
186	20160312_03_A2.5829.5829.3 File:"20160312_03_A2.raw", NativeID:"controllerType=0 controllerNumber=1 scan=5829"	LGGRDSR+0.984SGSPMAR	LGGRDSrSGSPMAR	tr|H7BYR8|H7BYR8_HUMAN(pre=K,post=R);sp|P02686|MBP_HUMAN(pre=K,post=R);sp|P02686-3|MBP_HUMAN(pre=K,post=R);sp|P02686-4|MBP_HUMAN(pre=K,post=R);sp|P02686-5|MBP_HUMAN(pre=K,post=R);sp|P02686-6|MBP_HUMAN(pre=K,post=R);tr|E9PJ72|E9PJ72_HUMAN(pre=K,post=R);tr|A8MZH3|A8MZH3_HUMAN(pre=K,post=R)	3	483.241	1	0	3	2	5	0	0	0	0	0.950382	1	Valid
187	20160312_03_A2.5849.5849.2 File:"20160312_03_A2.raw", NativeID:"controllerType=0 controllerNumber=1 scan=5849"	GAVEGAAR+0.984TTPSR	GAVEGAArTTPSR	sp|O75781|PALM_HUMAN(pre=R,post=R);sp|O75781-2|PALM_HUMAN(pre=R,post=R);tr|A0A087WTK8|A0A087WTK8_HUMAN(pre=R,post=R);tr|A0A087WWY4|A0A087WWY4_HUMAN(pre=R,post=R)	2	637.329	1	1	9	1	11	2	0	2	0	0.999959	1	Valid
188	20160312_03_A2.5922.5922.2 File:"20160312_03_A2.raw", NativeID:"controllerType=0 controllerNumber=1 scan=5922"	GQANATR+0.984IPAK	GQANATrIPAK	sp|P10636|TAU_HUMAN(pre=K,post=T);sp|P10636-2|TAU_HUMAN(pre=K,post=T);sp|P10636-3|TAU_HUMAN(pre=K,post=T);sp|P10636-4|TAU_HUMAN(pre=K,post=T);sp|P10636-5|TAU_HUMAN(pre=K,post=T);sp|P10636-6|TAU_HUMAN(pre=K,post=T);sp|P10636-7|TAU_HUMAN(pre=K,post=T);sp|P10636-8|TAU_HUMAN(pre=K,post=T);sp|P10636-9|TAU_HUMAN(pre=K,post=T);tr|I3L170|I3L170_HUMAN(pre=K,post=T);tr|A0A0G2JMX7|A0A0G2JMX7_HUMAN(pre=K,pos…	2	564.313	1	0	5	2	7	1	1	2	0	0.997991	1	Valid
189	20160312_03_A2.6598.6598.2 File:"20160312_03_A2.raw", NativeID:"controllerType=0 controllerNumber=1 scan=6598"	ER+0.984GGVIN+0.984LR	ErGGVInLR	sp|Q9UJA5|TRM6_HUMAN(pre=R,post=L);sp|Q9UJA5-4|TRM6_HUMAN(pre=R,post=L)	2	508.281	1	0	1	0	1	0	0	0	0	0.278664	0	Valid
190	20160312_03_A2.7381.7381.2 File:"20160312_03_A2.raw", NativeID:"controllerType=0 controllerNumber=1 scan=7381"	AAQDR+0.984DQIYR	AAQDrDQIYR	sp|P62995|TRA2B_HUMAN(pre=R,post=R);sp|P62995-3|TRA2B_HUMAN(pre=R,post=R);tr|H7C2L4|H7C2L4_HUMAN(pre=R,post=R)	2	618.803	1	1	5	0	6	0	1	1	0	0.989852	1	Valid
191	20160312_03_A2.7399.7399.2 File:"20160312_03_A2.raw", NativeID:"controllerType=0 controllerNumber=1 scan=7399"	PSSSR+0.984SYVTTSTR	PSSSrSYVTTSTR	sp|P08670|VIME_HUMAN(pre=R,post=T);tr|B0YJC4|B0YJC4_HUMAN(pre=R,post=T);tr|A0A1B0GVG8|A0A1B0GVG8_HUMAN(pre=R,post=T);tr|A0A1B0GTT5|A0A1B0GTT5_HUMAN(pre=R,post=T)	2	715.35	1	2	8	6	16	2	3	5	0	1	1	Valid
192	20160312_03_A2.7675.7675.2 File:"20160312_03_A2.raw", NativeID:"controllerType=0 controllerNumber=1 scan=7675"	SGYSSPGSPGTPGSR+0.984SR	SGYSSPGSPGTPGSrSR	sp|P10636|TAU_HUMAN(pre=R,post=T);sp|P10636-2|TAU_HUMAN(pre=R,post=T);sp|P10636-3|TAU_HUMAN(pre=R,post=T);sp|P10636-4|TAU_HUMAN(pre=R,post=T);sp|P10636-5|TAU_HUMAN(pre=R,post=T);sp|P10636-6|TAU_HUMAN(pre=R,post=T);sp|P10636-7|TAU_HUMAN(pre=R,post=T);sp|P10636-8|TAU_HUMAN(pre=R,post=T);sp|P10636-9|TAU_HUMAN(pre=R,post=T);tr|I3L170|I3L170_HUMAN(pre=R,post=T);tr|A0A0G2JMX7|A0A0G2JMX7_HUMAN(pre=R,pos…	2	819.38	1	0	4	0	4	0	0	0	0	0.878318	1	Valid
193	20160312_03_A2.7701.7701.2 File:"20160312_03_A2.raw", NativeID:"controllerType=0 controllerNumber=1 scan=7701"	AAAAAAAAAAGAAGGR+0.984	AAAAAAAAAAGAAGGr	sp|Q86U42|PABP2_HUMAN(pre=M,post=G);sp|Q86U42-2|PABP2_HUMAN(pre=M,post=G)	2	600.311	1	0	0	0	0	0	0	0	0	0.127083	0	Valid
194	20160312_03_A2.7887.7887.2 File:"20160312_03_A2.raw", NativeID:"controllerType=0 controllerNumber=1 scan=7887"	TVEM+15.995R+0.984DGEVIK	TVEmrDGEVIK	sp|P14136|GFAP_HUMAN(pre=K,post=E);tr|K7EMP8|K7EMP8_HUMAN(pre=K,post=E);tr|A0A1X7SBR3|A0A1X7SBR3_HUMAN(pre=K,post=E)	2	647.322	1	0	1	1	2	1	0	1	0	0.663002	1	Valid
195	20160312_03_A2.8315.8315.2 File:"20160312_03_A2.raw", NativeID:"controllerType=0 controllerNumber=1 scan=8315"	TVEM+15.995R+0.984DGEVIK	TVEmrDGEVIK	sp|P14136|GFAP_HUMAN(pre=K,post=E);tr|K7EMP8|K7EMP8_HUMAN(pre=K,post=E);tr|A0A1X7SBR3|A0A1X7SBR3_HUMAN(pre=K,post=E)	2	647.322	1	0	5	2	7	1	1	2	0	0.997991	1	Valid
196	20160312_03_A2.8999.8999.2 File:"20160312_03_A2.raw", NativeID:"controllerType=0 controllerNumber=1 scan=8999"	TASGSSVTSLDGTR+0.984SR	TASGSSVTSLDGTrSR	sp|Q92597|NDRG1_HUMAN(pre=R,post=S);sp|Q92597-2|NDRG1_HUMAN(pre=R,post=S);sp|Q92597-3|NDRG1_HUMAN(pre=R,post=S);tr|E5RJY1|E5RJY1_HUMAN(pre=R,post=S);tr|E7ESM1|E7ESM1_HUMAN(pre=R,post=S)	2	791.888	1	0	7	0	7	0	0	0	0	0.99264	1	Valid
197	20160312_03_A2.9245.9245.2 File:"20160312_03_A2.raw", NativeID:"controllerType=0 controllerNumber=1 scan=9245"	TIPITR+0.984EEK	TIPITrEEK	sp|P02511|CRYAB_HUMAN(pre=R,post=P);tr|A0A024R3B9|A0A024R3B9_HUMAN(pre=R,post=P);tr|E9PR44|E9PR44_HUMAN(pre=R,post=P);tr|E9PNH7|E9PNH7_HUMAN(pre=R,post=P);tr|H0YCW8|H0YCW8_HUMAN(pre=R,post=P)	2	544.304	1	0	6	5	11	1	0	1	0	0.999922	1	Valid
198	20160312_03_A2.9977.9977.2 File:"20160312_03_A2.raw", NativeID:"controllerType=0 controllerNumber=1 scan=9977"	VHISSVR+0.984SGYSTAR	VHISSVrSGYSTAR	sp|P07196|NFL_HUMAN(pre=R,post=S);tr|A0A0S2Z436|A0A0S2Z436_HUMAN(pre=R,post=S);tr|A0A087X0W2|A0A087X0W2_HUMAN(pre=R,post=S)	2	760.895	1	2	9	1	12	0	0	0	0	0.999944	1	Valid
199	20160312_03_A2.9987.9987.3 File:"20160312_03_A2.raw", NativeID:"controllerType=0 controllerNumber=1 scan=9987"	VHISSVR+0.984SGYSTAR	VHISSVrSGYSTAR	sp|P07196|NFL_HUMAN(pre=R,post=S);tr|A0A0S2Z436|A0A0S2Z436_HUMAN(pre=R,post=S);tr|A0A087X0W2|A0A087X0W2_HUMAN(pre=R,post=S)	3	507.599	1	0	0	0	0	0	0	0	0	0.127083	0	Valid
200	20160312_04_A3.10005.10005.3 File:"20160312_04_A3.raw", NativeID:"controllerType=0 controllerNumber=1 scan=10005"	VHISSVR+0.984SGYSTAR	VHISSVrSGYSTAR	sp|P07196|NFL_HUMAN(pre=R,post=S);tr|A0A0S2Z436|A0A0S2Z436_HUMAN(pre=R,post=S);tr|A0A087X0W2|A0A087X0W2_HUMAN(pre=R,post=S)	3	507.599	1	0	0	0	0	0	0	0	0	0.127083	0	Valid
201	20160312_04_A3.10322.10322.3 File:"20160312_04_A3.raw", NativeID:"controllerType=0 controllerNumber=1 scan=10322"	R+0.984WMTSLAPN+0.984RR	rWMTSLAPnRR	sp|Q8N5V2|NGEF_HUMAN(pre=K,post=T);sp|Q8N5V2-3|NGEF_HUMAN(pre=K,post=T)	3	463.907	1	0	1	0	1	0	0	0	0	0.278664	0	Valid
202	20160312_04_A3.11077.11077.3 File:"20160312_04_A3.raw", NativeID:"controllerType=0 controllerNumber=1 scan=11077"	NGR+0.984VEIIANDQGNR	NGrVEIIANDQGNR	sp|P11021|BIP_HUMAN(pre=K,post=I)	3	519.598	1	0	3	0	3	0	0	0	0	0.731196	1	Valid
203	20160312_04_A3.11393.11393.2 File:"20160312_04_A3.raw", NativeID:"controllerType=0 controllerNumber=1 scan=11393"	GPGPGGPGGAGVAR+0.984GGAGGGPSGD	GPGPGGPGGAGVArGGAGGGPSGD	sp|Q92686|NEUG_HUMAN(pre=K,post=-)	2	910.42	1	0	2	1	3	0	0	0	0	0.731196	1	Valid
204	20160312_04_A3.11874.11874.3 File:"20160312_04_A3.raw", NativeID:"controllerType=0 controllerNumber=1 scan=11874"	EDAANNYAR+0.984GHYTIGK	EDAANNYArGHYTIGK	sp|P0DPH7|TBA3C_HUMAN(pre=K,post=E);sp|P0DPH7-2|TBA3C_HUMAN(pre=K,post=E);sp|P68363|TBA1B_HUMAN(pre=K,post=E);sp|Q9BQE3|TBA1C_HUMAN(pre=K,post=E);sp|P0DPH8|TBA3D_HUMAN(pre=K,post=E);sp|Q71U36|TBA1A_HUMAN(pre=K,post=E);sp|Q71U36-2|TBA1A_HUMAN(pre=K,post=E);sp|P68366|TBA4A_HUMAN(pre=K,post=E);sp|P68366-2|TBA4A_HUMAN(pre=K,post=E);tr|F8VVB9|F8VVB9_HUMAN(pre=K,post=E);tr|F5H5D3|F5H5D3_HUMAN(pre=K,pos…	3	594.28	1	0	6	2	8	1	0	1	0	0.998546	1	Valid
205	20160312_04_A3.11877.11877.2 File:"20160312_04_A3.raw", NativeID:"controllerType=0 controllerNumber=1 scan=11877"	EDAANNYAR+0.984GHYTIGK	EDAANNYArGHYTIGK	sp|P0DPH7|TBA3C_HUMAN(pre=K,post=E);sp|P0DPH7-2|TBA3C_HUMAN(pre=K,post=E);sp|P68363|TBA1B_HUMAN(pre=K,post=E);sp|Q9BQE3|TBA1C_HUMAN(pre=K,post=E);sp|P0DPH8|TBA3D_HUMAN(pre=K,post=E);sp|Q71U36|TBA1A_HUMAN(pre=K,post=E);sp|Q71U36-2|TBA1A_HUMAN(pre=K,post=E);sp|P68366|TBA4A_HUMAN(pre=K,post=E);sp|P68366-2|TBA4A_HUMAN(pre=K,post=E);tr|F8VVB9|F8VVB9_HUMAN(pre=K,post=E);tr|F5H5D3|F5H5D3_HUMAN(pre=K,pos…	2	890.917	1	1	5	2	8	1	0	1	0	0.998546	1	Valid
206	20160312_04_A3.12065.12065.3 File:"20160312_04_A3.raw", NativeID:"controllerType=0 controllerNumber=1 scan=12065"	GAEGQRPGFGYGGR+0.984ASDYK	GAEGQRPGFGYGGrASDYK	tr|H7BYR8|H7BYR8_HUMAN(pre=K,post=S);sp|P02686-4|MBP_HUMAN(pre=K,post=S);sp|P02686-6|MBP_HUMAN(pre=K,post=S)	3	658.642	1	0	5	4	9	2	1	3	0	0.999851	1	Valid
207	20160312_04_A3.12151.12151.2 File:"20160312_04_A3.raw", NativeID:"controllerType=0 controllerNumber=1 scan=12151"	TEEGPTLSYGR+0.984DGR	TEEGPTLSYGrDGR	sp|P43243|MATR3_HUMAN(pre=R,post=S);tr|A8MXP9|A8MXP9_HUMAN(pre=R,post=S);tr|A0A0R4J2E8|A0A0R4J2E8_HUMAN(pre=R,post=S);tr|D6REM6|D6REM6_HUMAN(pre=R,post=S);tr|D6R991|D6R991_HUMAN(pre=R,post=S)	2	769.858	1	0	9	0	9	0	0	0	0	0.998948	1	Valid
208	20160312_04_A3.12202.12202.3 File:"20160312_04_A3.raw", NativeID:"controllerType=0 controllerNumber=1 scan=12202"	R+0.984R+0.984RPLQ+0.984K	rrRPLqK	sp|A9YTQ3|AHRR_HUMAN(pre=K,post=Q);sp|A9YTQ3-2|AHRR_HUMAN(pre=K,post=Q);sp|A9YTQ3-3|AHRR_HUMAN(pre=K,post=Q);tr|G3V143|G3V143_HUMAN(pre=K,post=Q);tr|E5RGQ2|E5RGQ2_HUMAN(pre=K,post=Q);tr|E5RFG4|E5RFG4_HUMAN(pre=K,post=Q)	3	319.527	2	0	0	0	0	0	0	0	0	0.127083	0	Valid
209	20160312_04_A3.12352.12352.2 File:"20160312_04_A3.raw", NativeID:"controllerType=0 controllerNumber=1 scan=12352"	TVEMR+0.984DGEVIK	TVEMrDGEVIK	sp|P14136|GFAP_HUMAN(pre=K,post=E);tr|K7EMP8|K7EMP8_HUMAN(pre=K,post=E);tr|A0A1X7SBR3|A0A1X7SBR3_HUMAN(pre=K,post=E)	2	639.324	1	0	3	1	4	0	0	0	0	0.878318	1	Valid
210	20160312_04_A3.13502.13502.3 File:"20160312_04_A3.raw", NativeID:"controllerType=0 controllerNumber=1 scan=13502"	LQESTQTVQSLHGSSR+0.984ALSNSNR	LQESTQTVQSLHGSSrALSNSNR	sp|Q9Y5S2|MRCKB_HUMAN(pre=K,post=D)	3	834.417	1	0	5	0	5	0	0	0	0	0.950382	1	Valid
211	20160312_04_A3.1473.1473.2 File:"20160312_04_A3.raw", NativeID:"controllerType=0 controllerNumber=1 scan=1473"	PSSR+0.984ASSR+0.984ASSR	PSSrASSrASSR	sp|P17302|CXA1_HUMAN(pre=R,post=P)	2	625.808	2	1	12	2	15	1	1	2	0	0.999999	1	Valid
212	20160312_04_A3.15194.15194.2 File:"20160312_04_A3.raw", NativeID:"controllerType=0 controllerNumber=1 scan=15194"	HIAEVSQEVTR+0.984SLK	HIAEVSQEVTrSLK	sp|P61764|STXB1_HUMAN(pre=K,post=D);sp|P61764-2|STXB1_HUMAN(pre=K,post=D);tr|A0A0D9SG72|A0A0D9SG72_HUMAN(pre=K,post=D);tr|A0A1B0GWF2|A0A1B0GWF2_HUMAN(pre=K,post=D);tr|A0A1B0GW76|A0A1B0GW76_HUMAN(pre=K,post=D);tr|A0A1B0GTP9|A0A1B0GTP9_HUMAN(pre=K,post=D);tr|A0A1B0GVQ5|A0A1B0GVQ5_HUMAN(pre=K,post=D);tr|A0A2R8Y5D4|A0A2R8Y5D4_HUMAN(pre=K,post=D)	2	799.431	1	1	2	2	5	1	0	1	0	0.973517	1	Valid
213	20160312_04_A3.15267.15267.2 File:"20160312_04_A3.raw", NativeID:"controllerType=0 controllerNumber=1 scan=15267"	PSFSTIYQ+0.984ELQSIR+0.984K	PSFSTIYqELQSIrK	sp|P07332|FES_HUMAN(pre=R,post=R);sp|P07332-2|FES_HUMAN(pre=R,post=R);sp|P07332-3|FES_HUMAN(pre=R,post=R);sp|P07332-4|FES_HUMAN(pre=R,post=R);tr|E7ENM8|E7ENM8_HUMAN(pre=R,post=R)	2	899.965	1	0	0	0	0	0	0	0	0	0.127083	0	Ambiguous
214	20160312_04_A3.15373.15373.2 File:"20160312_04_A3.raw", NativeID:"controllerType=0 controllerNumber=1 scan=15373"	HR+0.984DTGILDSIGR	HrDTGILDSIGR	tr|H7BYR8|H7BYR8_HUMAN(pre=R,post=F);sp|P02686|MBP_HUMAN(pre=R,post=F);sp|P02686-2|MBP_HUMAN(pre=R,post=F);sp|P02686-3|MBP_HUMAN(pre=R,post=F);sp|P02686-4|MBP_HUMAN(pre=R,post=F);sp|P02686-5|MBP_HUMAN(pre=R,post=F);sp|P02686-6|MBP_HUMAN(pre=R,post=F);tr|E9PKX9|E9PKX9_HUMAN(pre=R,post=F);tr|J3QL64|J3QL64_HUMAN(pre=R,post=F);tr|E9PJ72|E9PJ72_HUMAN(pre=R,post=F);tr|J3KT34|J3KT34_HUMAN(pre=R,post=F);…	2	670.85	1	2	2	0	4	0	0	0	0	0.878318	1	Valid
215	20160312_04_A3.15444.15444.3 File:"20160312_04_A3.raw", NativeID:"controllerType=0 controllerNumber=1 scan=15444"	HR+0.984DTGILDSIGR	HrDTGILDSIGR	tr|H7BYR8|H7BYR8_HUMAN(pre=R,post=F);sp|P02686|MBP_HUMAN(pre=R,post=F);sp|P02686-2|MBP_HUMAN(pre=R,post=F);sp|P02686-3|MBP_HUMAN(pre=R,post=F);sp|P02686-4|MBP_HUMAN(pre=R,post=F);sp|P02686-5|MBP_HUMAN(pre=R,post=F);sp|P02686-6|MBP_HUMAN(pre=R,post=F);tr|E9PKX9|E9PKX9_HUMAN(pre=R,post=F);tr|J3QL64|J3QL64_HUMAN(pre=R,post=F);tr|E9PJ72|E9PJ72_HUMAN(pre=R,post=F);tr|J3KT34|J3KT34_HUMAN(pre=R,post=F);…	3	447.569	1	0	10	0	10	0	0	0	0	0.999603	1	Valid
216	20160312_04_A3.15571.15571.2 File:"20160312_04_A3.raw", NativeID:"controllerType=0 controllerNumber=1 scan=15571"	HR+0.984DTGILDSIGR	HrDTGILDSIGR	tr|H7BYR8|H7BYR8_HUMAN(pre=R,post=F);sp|P02686|MBP_HUMAN(pre=R,post=F);sp|P02686-2|MBP_HUMAN(pre=R,post=F);sp|P02686-3|MBP_HUMAN(pre=R,post=F);sp|P02686-4|MBP_HUMAN(pre=R,post=F);sp|P02686-5|MBP_HUMAN(pre=R,post=F);sp|P02686-6|MBP_HUMAN(pre=R,post=F);tr|E9PKX9|E9PKX9_HUMAN(pre=R,post=F);tr|J3QL64|J3QL64_HUMAN(pre=R,post=F);tr|E9PJ72|E9PJ72_HUMAN(pre=R,post=F);tr|J3KT34|J3KT34_HUMAN(pre=R,post=F);…	2	670.85	1	2	6	0	8	0	0	0	0	0.997214	1	Valid
217	20160312_04_A3.16183.16183.4 File:"20160312_04_A3.raw", NativeID:"controllerType=0 controllerNumber=1 scan=16183"	ARPIWYVGR+0.984DPAAAPATGNR	ARPIWYVGrDPAAAPATGNR	sp|Q9ULD0|OGDHL_HUMAN(pre=R,post=N);sp|Q9ULD0-2|OGDHL_HUMAN(pre=R,post=N);sp|Q9ULD0-3|OGDHL_HUMAN(pre=R,post=N)	4	535.782	1	0	1	0	1	0	0	0	0	0.278664	0	Valid
218	20160312_04_A3.16648.16648.3 File:"20160312_04_A3.raw", NativeID:"controllerType=0 controllerNumber=1 scan=16648"	YFDR+0.984VDENNPEYLR	YFDrVDENNPEYLR	sp|P35611|ADDA_HUMAN(pre=R,post=E);sp|P35611-2|ADDA_HUMAN(pre=R,post=E);sp|P35611-3|ADDA_HUMAN(pre=R,post=E);sp|P35611-4|ADDA_HUMAN(pre=R,post=E);sp|P35611-5|ADDA_HUMAN(pre=R,post=E);sp|P35611-6|ADDA_HUMAN(pre=R,post=E);tr|D6RAH3|D6RAH3_HUMAN(pre=R,post=E);tr|E7ENY0|E7ENY0_HUMAN(pre=R,post=E);tr|A0A0A0MSR2|A0A0A0MSR2_HUMAN(pre=R,post=E);tr|D6RJE2|D6RJE2_HUMAN(pre=R,post=E);tr|E7EV99|E7EV99_HUMAN(…	3	610.948	1	0	0	0	0	0	0	0	0	0.127083	0	Ambiguous
219	20160312_04_A3.174.174.2 File:"20160312_04_A3.raw", NativeID:"controllerType=0 controllerNumber=1 scan=174"	SIR+0.984TQEK	SIrTQEK	sp|P07196|NFL_HUMAN(pre=K,post=A);tr|A0A0S2Z436|A0A0S2Z436_HUMAN(pre=K,post=A);tr|A0A087X0W2|A0A087X0W2_HUMAN(pre=K,post=A)	2	431.736	1	0	3	0	3	0	2	2	0	0.909249	1	Valid
220	20160312_04_A3.17548.17548.2 File:"20160312_04_A3.raw", NativeID:"controllerType=0 controllerNumber=1 scan=17548"	EAASR+0.984GILDVQSVQEK	EAASrGILDVQSVQEK	sp|Q8NHG7|SVIP_HUMAN(pre=K,post=R)	2	865.95	1	0	1	1	2	2	0	2	0	0.790609	1	Valid
221	20160312_04_A3.19106.19106.4 File:"20160312_04_A3.raw", NativeID:"controllerType=0 controllerNumber=1 scan=19106"	LAAGHELQPLAIVDQRPSSR+0.984ASSR+0.984ASSR	LAAGHELQPLAIVDQRPSSrASSrASSR	sp|P17302|CXA1_HUMAN(pre=K,post=P)	4	741.392	2	0	13	3	16	0	0	0	0	0.999999	1	Valid
222	20160312_04_A3.1949.1949.2 File:"20160312_04_A3.raw", NativeID:"controllerType=0 controllerNumber=1 scan=1949"	DSR+0.984SGSPM+15.995AR+0.984R	DSrSGSPmArR	tr|H7BYR8|H7BYR8_HUMAN(pre=R,post=-);sp|P02686|MBP_HUMAN(pre=R,post=-);sp|P02686-3|MBP_HUMAN(pre=R,post=-);sp|P02686-4|MBP_HUMAN(pre=R,post=-);sp|P02686-5|MBP_HUMAN(pre=R,post=-);sp|P02686-6|MBP_HUMAN(pre=R,post=-);tr|E9PJ72|E9PJ72_HUMAN(pre=R,post=-);tr|A8MZH3|A8MZH3_HUMAN(pre=R,post=-);tr|J3QQK6|J3QQK6_HUMAN(pre=R,post=-);tr|F8WEU6|F8WEU6_HUMAN(pre=R,post=-)	2	619.284	2	0	5	0	5	0	0	0	0	0.950382	1	Valid
223	20160312_04_A3.20201.20201.3 File:"20160312_04_A3.raw", NativeID:"controllerType=0 controllerNumber=1 scan=20201"	KGQ+0.984VVAERFAAHEGM+15.995RPM+15.995R+0.984	KGqVVAERFAAHEGmRPmr	sp|Q6QEF8-5|CORO6_HUMAN(pre=R,post=A)	3	735.362	1	0	3	0	3	0	0	0	0	0.731196	1	Ambiguous
224	20160312_04_A3.21438.21438.4 File:"20160312_04_A3.raw", NativeID:"controllerType=0 controllerNumber=1 scan=21438"	GYSFTTTAER+0.984EIVRDIK	GYSFTTTAErEIVRDIK	tr|I3L4N8|I3L4N8_HUMAN(pre=R,post=E);sp|P63261|ACTG_HUMAN(pre=R,post=E);sp|P60709|ACTB_HUMAN(pre=R,post=E);tr|I3L3I0|I3L3I0_HUMAN(pre=R,post=E);tr|A0A2R8Y793|A0A2R8Y793_HUMAN(pre=R,post=E);tr|I3L1U9|I3L1U9_HUMAN(pre=R,post=E);tr|A0A2R8YEA7|A0A2R8YEA7_HUMAN(pre=R,post=E)	4	497.509	1	0	0	1	1	0	0	0	0	0.278664	0	Valid
225	20160312_04_A3.21752.21752.2 File:"20160312_04_A3.raw", NativeID:"controllerType=0 controllerNumber=1 scan=21752"	R+0.984WSLQ+0.984HVPDASGSSGK	rWSLqHVPDASGSSGK	tr|A0A1B0GVY1|A0A1B0GVY1_HUMAN(pre=R,post=R)	2	857.414	1	0	1	0	1	0	0	0	0	0.278664	0	Ambiguous
226	20160312_04_A3.21857.21857.4 File:"20160312_04_A3.raw", NativeID:"controllerType=0 controllerNumber=1 scan=21857"	ELEAIFGR+0.984PVVDGEEGEPHSISPR	ELEAIFGrPVVDGEEGEPHSISPR	sp|P36507|MP2K2_HUMAN(pre=K,post=P);tr|G5E9C7|G5E9C7_HUMAN(pre=K,post=P)	4	656.077	1	0	1	1	2	0	0	0	0	0.5062	1	Valid
227	20160312_04_A3.22150.22150.4 File:"20160312_04_A3.raw", NativeID:"controllerType=0 controllerNumber=1 scan=22150"	QQAPPVR+0.984NLHQSGFSLSGAQIDDNIPR	QQAPPVrNLHQSGFSLSGAQIDDNIPR	sp|Q16555|DPYL2_HUMAN(pre=K,post=R);sp|Q16555-2|DPYL2_HUMAN(pre=K,post=R);tr|A0A1C7CYX9|A0A1C7CYX9_HUMAN(pre=K,post=R)	4	737.376	1	0	2	1	3	0	0	0	0	0.731196	1	Valid
228	20160312_04_A3.23559.23559.5 File:"20160312_04_A3.raw", NativeID:"controllerType=0 controllerNumber=1 scan=23559"	N+0.984VGMPIAMLLHTDGEHER+0.984PGGDATVTIAHR	nVGMPIAMLLHTDGEHErPGGDATVTIAHR	sp|Q9H903|MTD2L_HUMAN(pre=K,post=Y);sp|Q9H903-1|MTD2L_HUMAN(pre=K,post=Y);sp|Q9H903-3|MTD2L_HUMAN(pre=K,post=Y);sp|Q9H903-5|MTD2L_HUMAN(pre=K,post=Y);tr|A0A0C4DG60|A0A0C4DG60_HUMAN(pre=K,post=Y);tr|F8W7P9|F8W7P9_HUMAN(pre=K,post=Y)	5	640.316	1	0	0	0	0	0	0	0	0	0.127083	0	Ambiguous
229	20160312_04_A3.23956.23956.4 File:"20160312_04_A3.raw", NativeID:"controllerType=0 controllerNumber=1 scan=23956"	SINAFRETAKQ+0.984KLDPAASVTGSKR+0.984	SINAFRETAKqKLDPAASVTGSKr	sp|P46013|KI67_HUMAN(pre=K,post=H);sp|P46013-2|KI67_HUMAN(pre=K,post=H)	4	645.097	1	0	1	0	1	0	0	0	0	0.278664	0	Valid
230	20160312_04_A3.24537.24537.2 File:"20160312_04_A3.raw", NativeID:"controllerType=0 controllerNumber=1 scan=24537"	FHDLR+0.984PDEVADLFQTTQR	FHDLrPDEVADLFQTTQR	sp|P49789|FHIT_HUMAN(pre=R,post=V);tr|E9PBZ0|E9PBZ0_HUMAN(pre=R,post=V);tr|A0A0A0MRB0|A0A0A0MRB0_HUMAN(pre=R,post=V)	2	1095.04	1	0	0	0	0	0	0	0	0	0.127083	0	Valid
231	20160312_04_A3.25151.25151.4 File:"20160312_04_A3.raw", NativeID:"controllerType=0 controllerNumber=1 scan=25151"	FWEVISDEHGIDPTGTYHGDSDLQLER+0.984	FWEVISDEHGIDPTGTYHGDSDLQLEr	sp|P04350|TBB4A_HUMAN(pre=K,post=I);sp|P68371|TBB4B_HUMAN(pre=K,post=I);tr|M0R0X0|M0R0X0_HUMAN(pre=K,post=I);tr|M0R278|M0R278_HUMAN(pre=K,post=I);tr|M0QY85|M0QY85_HUMAN(pre=K,post=I);tr|M0QX14|M0QX14_HUMAN(pre=K,post=I);tr|M0QY37|M0QY37_HUMAN(pre=K,post=I);tr|M0QZL7|M0QZL7_HUMAN(pre=K,post=I);tr|M0QYM7|M0QYM7_HUMAN(pre=K,post=I);tr|M0R2D3|M0R2D3_HUMAN(pre=K,post=I)	4	780.108	1	0	1	0	1	0	0	0	0	0.278664	0	Valid
232	20160312_04_A3.25335.25335.4 File:"20160312_04_A3.raw", NativeID:"controllerType=0 controllerNumber=1 scan=25335"	QLFAYPGC+57.021DAGIRAMALSYDQR+0.984RPR	QLFAYPGcDAGIRAMALSYDQrRPR	tr|A0A3B3IS13|A0A3B3IS13_HUMAN(pre=K,post=S)	4	729.112	1	0	0	0	0	0	0	0	0	0.127083	0	Ambiguous
233	20160312_04_A3.25964.25964.3 File:"20160312_04_A3.raw", NativeID:"controllerType=0 controllerNumber=1 scan=25964"	TDLNPDNLQGGDDLDPNYVLSSR+0.984VR+0.984TGR	TDLNPDNLQGGDDLDPNYVLSSrVrTGR	sp|P12277|KCRB_HUMAN(pre=K,post=S);tr|G3V4N7|G3V4N7_HUMAN(pre=K,post=S);tr|G3V461|G3V461_HUMAN(pre=K,post=S)	3	1030.5	2	0	9	3	12	0	0	0	0	0.999944	1	Valid
234	20160312_04_A3.25965.25965.2 File:"20160312_04_A3.raw", NativeID:"controllerType=0 controllerNumber=1 scan=25965"	TDLNPDNLQGGDDLDPNYVLSSR+0.984VR	TDLNPDNLQGGDDLDPNYVLSSrVR	sp|P12277|KCRB_HUMAN(pre=K,post=T);tr|G3V4N7|G3V4N7_HUMAN(pre=K,post=T);tr|G3V461|G3V461_HUMAN(pre=K,post=T)	2	1387.67	1	0	6	1	7	0	0	0	0	0.99264	1	Valid
235	20160312_04_A3.25977.25977.3 File:"20160312_04_A3.raw", NativeID:"controllerType=0 controllerNumber=1 scan=25977"	TDLNPDNLQGGDDLDPNYVLSSR+0.984VR	TDLNPDNLQGGDDLDPNYVLSSrVR	sp|P12277|KCRB_HUMAN(pre=K,post=T);tr|G3V4N7|G3V4N7_HUMAN(pre=K,post=T);tr|G3V461|G3V461_HUMAN(pre=K,post=T)	3	925.446	1	0	11	0	11	0	0	0	0	0.99985	1	Valid
236	20160312_04_A3.2601.2601.3 File:"20160312_04_A3.raw", NativeID:"controllerType=0 controllerNumber=1 scan=2601"	R+0.984HQ+0.984LSHR	rHqLSHR	sp|Q9H9D4|ZN408_HUMAN(pre=R,post=P)	3	312.499	1	0	1	0	1	0	0	0	0	0.278664	0	Valid
237	20160312_04_A3.26358.26358.5 File:"20160312_04_A3.raw", NativeID:"controllerType=0 controllerNumber=1 scan=26358"	R+0.984LEASDGGLDSAELAAELGMEHQAVVGAVK	rLEASDGGLDSAELAAELGMEHQAVVGAVK	sp|Q9Y285|SYFA_HUMAN(pre=R,post=S);sp|Q9Y285-2|SYFA_HUMAN(pre=R,post=S);tr|K7EPH2|K7EPH2_HUMAN(pre=R,post=S);tr|K7EK06|K7EK06_HUMAN(pre=R,post=S);tr|K7ER16|K7ER16_HUMAN(pre=R,post=S);tr|K7ER00|K7ER00_HUMAN(pre=R,post=S)	5	605.705	1	0	0	0	0	0	0	0	0	0.127083	0	Ambiguous
238	20160312_04_A3.26949.26949.3 File:"20160312_04_A3.raw", NativeID:"controllerType=0 controllerNumber=1 scan=26949"	ISEELTDVDSPLPHYR+0.984VEPSLEGALTK	ISEELTDVDSPLPHYrVEPSLEGALTK	sp|Q8TAM6|ERMIN_HUMAN(pre=K,post=G);sp|Q8TAM6-2|ERMIN_HUMAN(pre=K,post=G);tr|B8ZZ94|B8ZZ94_HUMAN(pre=K,post=G);tr|B4DIZ1|B4DIZ1_HUMAN(pre=K,post=G);tr|F8WAQ2|F8WAQ2_HUMAN(pre=K,post=G);tr|C9J6B4|C9J6B4_HUMAN(pre=K,post=G);tr|C9J8X3|C9J8X3_HUMAN(pre=K,post=G);tr|C9JN04|C9JN04_HUMAN(pre=K,post=G)	3	999.509	1	0	9	2	11	0	0	0	0	0.99985	1	Valid
239	20160312_04_A3.27022.27022.3 File:"20160312_04_A3.raw", NativeID:"controllerType=0 controllerNumber=1 scan=27022"	ISEELTDVDSPLPHYR+0.984VEPSLEGALTK	ISEELTDVDSPLPHYrVEPSLEGALTK	sp|Q8TAM6|ERMIN_HUMAN(pre=K,post=G);sp|Q8TAM6-2|ERMIN_HUMAN(pre=K,post=G);tr|B8ZZ94|B8ZZ94_HUMAN(pre=K,post=G);tr|B4DIZ1|B4DIZ1_HUMAN(pre=K,post=G);tr|F8WAQ2|F8WAQ2_HUMAN(pre=K,post=G);tr|C9J6B4|C9J6B4_HUMAN(pre=K,post=G);tr|C9J8X3|C9J8X3_HUMAN(pre=K,post=G);tr|C9JN04|C9JN04_HUMAN(pre=K,post=G)	3	999.509	1	0	3	0	3	0	0	0	0	0.731196	1	Valid
240	20160312_04_A3.27166.27166.5 File:"20160312_04_A3.raw", NativeID:"controllerType=0 controllerNumber=1 scan=27166"	TLRAVC+57.021GQPGM+15.995PR+0.984DPWDLPVGQ+0.984RR	TLRAVcGQPGmPrDPWDLPVGqRR	sp|Q8NCH0|CHSTE_HUMAN(pre=R,post=T);tr|H0YN65|H0YN65_HUMAN(pre=R,post=T)	5	556.881	1	0	1	2	3	1	3	4	0	0.973617	1	Valid
241	20160312_04_A3.28271.28271.4 File:"20160312_04_A3.raw", NativeID:"controllerType=0 controllerNumber=1 scan=28271"	VR+0.984R+0.984LGR+0.984ELPVN+0.984TLDELIDQLGGPQR	VrrLGrELPVnTLDELIDQLGGPQR	sp|Q9Y2G9|SBNO2_HUMAN(pre=K,post=V);sp|Q9Y2G9-3|SBNO2_HUMAN(pre=K,post=V);tr|K7ES28|K7ES28_HUMAN(pre=K,post=V)	4	712.885	3	0	0	0	0	0	0	0	0	0.127083	0	Ambiguous
242	20160312_04_A3.30275.30275.3 File:"20160312_04_A3.raw", NativeID:"controllerType=0 controllerNumber=1 scan=30275"	HR+0.984DTGILDSIGRFFGGDR+0.984GAPK	HrDTGILDSIGRFFGGDrGAPK	tr|H7BYR8|H7BYR8_HUMAN(pre=R,post=R);sp|P02686|MBP_HUMAN(pre=R,post=R);sp|P02686-2|MBP_HUMAN(pre=R,post=R);sp|P02686-3|MBP_HUMAN(pre=R,post=R);sp|P02686-4|MBP_HUMAN(pre=R,post=R);sp|P02686-5|MBP_HUMAN(pre=R,post=R);sp|P02686-6|MBP_HUMAN(pre=R,post=R);tr|E9PKX9|E9PKX9_HUMAN(pre=R,post=R);tr|J3QL64|J3QL64_HUMAN(pre=R,post=R);tr|E9PJ72|E9PJ72_HUMAN(pre=R,post=R);tr|J3KT34|J3KT34_HUMAN(pre=R,post=R);…	3	792.069	2	0	8	1	9	1	0	1	0	0.999452	1	Valid
243	20160312_04_A3.32608.32608.3 File:"20160312_04_A3.raw", NativeID:"controllerType=0 controllerNumber=1 scan=32608"	AR+0.984NDEYENLFNMIVEIPR	ArNDEYENLFNMIVEIPR	sp|Q9H2U2|IPYR2_HUMAN(pre=K,post=W);sp|Q9H2U2-2|IPYR2_HUMAN(pre=K,post=W);sp|Q9H2U2-3|IPYR2_HUMAN(pre=K,post=W);tr|D6RAD3|D6RAD3_HUMAN(pre=K,post=W);tr|D6RGI1|D6RGI1_HUMAN(pre=K,post=W);tr|D6RGV9|D6RGV9_HUMAN(pre=K,post=W)	3	742.029	1	0	0	0	0	0	0	0	0	0.127083	0	Ambiguous
244	20160312_04_A3.3481.3481.2 File:"20160312_04_A3.raw", NativeID:"controllerType=0 controllerNumber=1 scan=3481"	TSEIQAR+0.984GTK	TSEIQArGTK	tr|H0Y542|H0Y542_HUMAN(pre=K,post=K);sp|O75363-2|BCAS1_HUMAN(pre=K,post=K)	2	546.289	1	0	5	3	8	1	1	2	0	0.999242	1	Valid
245	20160312_04_A3.3602.3602.2 File:"20160312_04_A3.raw", NativeID:"controllerType=0 controllerNumber=1 scan=3602"	QR+0.984ESVGGSPQTK	QrESVGGSPQTK	sp|Q08495|DEMA_HUMAN(pre=K,post=H);sp|Q08495-2|DEMA_HUMAN(pre=K,post=H);sp|Q08495-3|DEMA_HUMAN(pre=K,post=H);sp|Q08495-4|DEMA_HUMAN(pre=K,post=H);tr|E5RJC0|E5RJC0_HUMAN(pre=K,post=H);tr|E5RGQ0|E5RGQ0_HUMAN(pre=K,post=H);tr|E5RFK4|E5RFK4_HUMAN(pre=K,post=H);tr|E5RGQ7|E5RGQ7_HUMAN(pre=K,post=H)	2	637.821	1	1	0	0	1	0	0	0	0	0.278664	0	Valid
246	20160312_04_A3.4510.4510.3 File:"20160312_04_A3.raw", NativeID:"controllerType=0 controllerNumber=1 scan=4510"	R+0.984YTN+0.984PIGRPK	rYTnPIGRPK	sp|Q92794|KAT6A_HUMAN(pre=R,post=N);tr|A5PLL3|A5PLL3_HUMAN(pre=R,post=N);tr|A0A3B3IS53|A0A3B3IS53_HUMAN(pre=R,post=N);tr|A0A3F2YNX6|A0A3F2YNX6_HUMAN(pre=R,post=N);tr|A0A3B3ISU5|A0A3B3ISU5_HUMAN(pre=R,post=N)	3	401.888	1	0	0	0	0	0	0	0	0	0.127083	0	Ambiguous
247	20160312_04_A3.4867.4867.2 File:"20160312_04_A3.raw", NativeID:"controllerType=0 controllerNumber=1 scan=4867"	GR+0.984STINPSK	GrSTINPSK	sp|Q13823|NOG2_HUMAN(pre=K,post=A)	2	480.76	1	0	2	0	2	0	0	0	0	0.5062	1	Valid
248	20160312_04_A3.5096.5096.2 File:"20160312_04_A3.raw", NativeID:"controllerType=0 controllerNumber=1 scan=5096"	HGFLPR+0.984HR	HGFLPrHR	tr|H7BYR8|H7BYR8_HUMAN(pre=R,post=D);sp|P02686|MBP_HUMAN(pre=R,post=D);sp|P02686-2|MBP_HUMAN(pre=R,post=D);sp|P02686-3|MBP_HUMAN(pre=R,post=D);sp|P02686-4|MBP_HUMAN(pre=R,post=D);sp|P02686-5|MBP_HUMAN(pre=R,post=D);sp|P02686-6|MBP_HUMAN(pre=R,post=D);tr|E9PKX9|E9PKX9_HUMAN(pre=R,post=D);tr|J3QL64|J3QL64_HUMAN(pre=R,post=D);tr|J3KT34|J3KT34_HUMAN(pre=R,post=D);tr|J3QKL5|J3QKL5_HUMAN(pre=R,post=D);…	2	510.778	1	1	5	2	8	3	0	3	0	0.999605	1	Valid
249	20160312_04_A3.5365.5365.2 File:"20160312_04_A3.raw", NativeID:"controllerType=0 controllerNumber=1 scan=5365"	R+0.984TQEQISNVK	rTQEQISNVK	sp|O76041-2|NEBL_HUMAN(pre=K,post=Y)	2	602.321	1	0	0	0	0	0	0	0	0	0.127083	0	Valid
250	20160312_04_A3.5694.5694.2 File:"20160312_04_A3.raw", NativeID:"controllerType=0 controllerNumber=1 scan=5694"	LTDTSR+0.984YTGSHK	LTDTSrYTGSHK	sp|Q9BW30|TPPP3_HUMAN(pre=R,post=E)	2	683.834	1	0	2	0	2	0	1	1	0	0.663002	1	Valid
251	20160312_04_A3.5947.5947.2 File:"20160312_04_A3.raw", NativeID:"controllerType=0 controllerNumber=1 scan=5947"	SQSGGYSDR+0.984SSGGSYR	SQSGGYSDrSSGGSYR	sp|Q14011|CIRBP_HUMAN(pre=R,post=D);sp|Q14011-2|CIRBP_HUMAN(pre=R,post=D);sp|Q14011-3|CIRBP_HUMAN(pre=R,post=D);tr|D6W5Y5|D6W5Y5_HUMAN(pre=R,post=D);tr|K7EPM4|K7EPM4_HUMAN(pre=R,post=D);tr|K7EQR7|K7EQR7_HUMAN(pre=R,post=D);tr|F6WMK9|F6WMK9_HUMAN(pre=R,post=D)	2	826.351	1	1	10	5	16	1	2	3	0	1	1	Valid
252	20160312_04_A3.6086.6086.2 File:"20160312_04_A3.raw", NativeID:"controllerType=0 controllerNumber=1 scan=6086"	RGTQ+0.984SPER+0.984KR	RGTqSPErKR	sp|Q8TDR2|STK35_HUMAN(pre=R,post=R);tr|A0A0C4DGC9|A0A0C4DGC9_HUMAN(pre=R,post=R)	2	608.824	1	0	1	0	1	0	0	0	0	0.278664	0	Valid
253	20160312_04_A3.6246.6246.2 File:"20160312_04_A3.raw", NativeID:"controllerType=0 controllerNumber=1 scan=6246"	QEMQEVQSSR+0.984SGR	QEMQEVQSSrSGR	sp|P22626|ROA2_HUMAN(pre=R,post=G);sp|P22626-2|ROA2_HUMAN(pre=R,post=G)	2	761.85	1	1	11	0	12	0	0	0	0	0.999944	1	Valid
254	20160312_04_A3.7505.7505.3 File:"20160312_04_A3.raw", NativeID:"controllerType=0 controllerNumber=1 scan=7505"	LWR+0.984HEAAR+0.984R	LWrHEAArR	sp|Q8N4S9|MALD2_HUMAN(pre=K,post=H);sp|Q8N4S9-2|MALD2_HUMAN(pre=K,post=H);sp|Q8N4S9-3|MALD2_HUMAN(pre=K,post=H);tr|A1BQX2|A1BQX2_HUMAN(pre=K,post=H);tr|A0A0G2JQ38|A0A0G2JQ38_HUMAN(pre=K,post=H);tr|D6RA09|D6RA09_HUMAN(pre=K,post=H);tr|A0A0G2JN23|A0A0G2JN23_HUMAN(pre=K,post=H)	3	399.548	2	0	2	2	4	1	0	1	0	0.932673	1	Valid
255	20160312_04_A3.8250.8250.2 File:"20160312_04_A3.raw", NativeID:"controllerType=0 controllerNumber=1 scan=8250"	DSYSSR+0.984DYPSSR	DSYSSrDYPSSR	sp|P38159|RBMX_HUMAN(pre=K,post=D);sp|P38159-2|RBMX_HUMAN(pre=K,post=D);sp|Q96E39|RMXL1_HUMAN(pre=K,post=D);tr|H0Y6E7|H0Y6E7_HUMAN(pre=K,post=D);tr|H3BUY5|H3BUY5_HUMAN(pre=K,post=D);tr|H3BT71|H3BT71_HUMAN(pre=K,post=D)	2	710.803	1	0	2	0	2	0	0	0	0	0.5062	1	Valid
256	20160312_04_A3.8329.8329.2 File:"20160312_04_A3.raw", NativeID:"controllerType=0 controllerNumber=1 scan=8329"	SGDR+0.984SGYSSPGSPGTPGSR	SGDrSGYSSPGSPGTPGSR	sp|P10636|TAU_HUMAN(pre=K,post=S);sp|P10636-2|TAU_HUMAN(pre=K,post=S);sp|P10636-3|TAU_HUMAN(pre=K,post=S);sp|P10636-4|TAU_HUMAN(pre=K,post=S);sp|P10636-5|TAU_HUMAN(pre=K,post=S);sp|P10636-6|TAU_HUMAN(pre=K,post=S);sp|P10636-7|TAU_HUMAN(pre=K,post=S);sp|P10636-8|TAU_HUMAN(pre=K,post=S);sp|P10636-9|TAU_HUMAN(pre=K,post=S);tr|I3L170|I3L170_HUMAN(pre=K,post=S);tr|A0A0G2JMX7|A0A0G2JMX7_HUMAN(pre=K,pos…	2	905.404	1	1	6	4	11	4	2	6	0	0.999997	1	Valid
257	20160312_04_A3.8561.8561.2 File:"20160312_04_A3.raw", NativeID:"controllerType=0 controllerNumber=1 scan=8561"	TVEM+15.995R+0.984DGEVIK	TVEmrDGEVIK	sp|P14136|GFAP_HUMAN(pre=K,post=E);tr|K7EMP8|K7EMP8_HUMAN(pre=K,post=E);tr|A0A1X7SBR3|A0A1X7SBR3_HUMAN(pre=K,post=E)	2	647.322	1	0	4	1	5	0	1	1	0	0.973517	1	Valid
258	20160312_04_A3.9944.9944.2 File:"20160312_04_A3.raw", NativeID:"controllerType=0 controllerNumber=1 scan=9944"	SR+0.984SDIDVNAAAGAK	SrSDIDVNAAAGAK	tr|B3KR06|B3KR06_HUMAN(pre=R,post=A);tr|E7ENG2|E7ENG2_HUMAN(pre=R,post=A);tr|E3W994|E3W994_HUMAN(pre=R,post=A);tr|J3KR49|J3KR49_HUMAN(pre=R,post=A);tr|E7ERI8|E7ERI8_HUMAN(pre=R,post=A);tr|E7EW49|E7EW49_HUMAN(pre=R,post=A);tr|A0A0U1RQI6|A0A0U1RQI6_HUMAN(pre=R,post=A);sp|O75122|CLAP2_HUMAN(pre=R,post=A);sp|O75122-2|CLAP2_HUMAN(pre=R,post=A);sp|O75122-3|CLAP2_HUMAN(pre=R,post=A)	2	688.345	1	0	4	2	6	0	2	2	0	0.994687	1	Valid
259	20160312_05_A4.10114.10114.3 File:"20160312_05_A4.raw", NativeID:"controllerType=0 controllerNumber=1 scan=10114"	ASGAPPGGQQR+0.984QGPPQKPPGPAGPTR	ASGAPPGGQQrQGPPQKPPGPAGPTR	sp|P17600|SYN1_HUMAN(pre=K,post=Q);sp|P17600-2|SYN1_HUMAN(pre=K,post=Q)	3	831.43	1	0	8	4	12	0	0	0	0	0.999944	1	Valid
260	20160312_05_A4.11835.11835.3 File:"20160312_05_A4.raw", NativeID:"controllerType=0 controllerNumber=1 scan=11835"	R+0.984EYLLQYNDPNRR	rEYLLQYNDPNRR	sp|O95168|NDUB4_HUMAN(pre=K,post=G);sp|O95168-2|NDUB4_HUMAN(pre=K,post=G);tr|F2Z3P9|F2Z3P9_HUMAN(pre=K,post=G);tr|C9JXQ9|C9JXQ9_HUMAN(pre=K,post=G)	3	579.961	1	0	0	0	0	0	0	0	0	0.127083	0	Ambiguous
261	20160312_05_A4.12155.12155.4 File:"20160312_05_A4.raw", NativeID:"controllerType=0 controllerNumber=1 scan=12155"	TYNR+0.984VPLHKPTDWQK	TYNrVPLHKPTDWQK	sp|Q96A26|F162A_HUMAN(pre=R,post=K);tr|E9PH05|E9PH05_HUMAN(pre=R,post=K);tr|F8W7Q4|F8W7Q4_HUMAN(pre=R,post=K)	4	471.75	1	0	1	0	1	3	4	7	0	0.973717	1	Valid
262	20160312_05_A4.12220.12220.2 File:"20160312_05_A4.raw", NativeID:"controllerType=0 controllerNumber=1 scan=12220"	TYNR+0.984VPLHKPTDWQK	TYNrVPLHKPTDWQK	sp|Q96A26|F162A_HUMAN(pre=R,post=K);tr|E9PH05|E9PH05_HUMAN(pre=R,post=K);tr|F8W7Q4|F8W7Q4_HUMAN(pre=R,post=K)	2	942.492	1	0	0	0	0	0	0	0	0	0.127083	0	Ambiguous
263	20160312_05_A4.13504.13504.3 File:"20160312_05_A4.raw", NativeID:"controllerType=0 controllerNumber=1 scan=13504"	EQHPDMSVTR+0.984VVVHK	EQHPDMSVTrVVVHK	sp|O43491|E41L2_HUMAN(pre=R,post=E);sp|O43491-2|E41L2_HUMAN(pre=R,post=E);sp|O43491-3|E41L2_HUMAN(pre=R,post=E);sp|O43491-4|E41L2_HUMAN(pre=R,post=E);tr|Q6R5J7|Q6R5J7_HUMAN(pre=R,post=E);tr|E9PHY5|E9PHY5_HUMAN(pre=R,post=E);tr|Q6ZSX4|Q6ZSX4_HUMAN(pre=R,post=E);tr|E9PK52|E9PK52_HUMAN(pre=R,post=E);tr|E9PII3|E9PII3_HUMAN(pre=R,post=E);tr|E9PPC9|E9PPC9_HUMAN(pre=R,post=E)	3	588.302	1	0	2	1	3	1	0	1	0	0.839242	1	Valid
264	20160312_05_A4.13936.13936.3 File:"20160312_05_A4.raw", NativeID:"controllerType=0 controllerNumber=1 scan=13936"	QAGPASVPLR+0.984TEEEFKK	QAGPASVPLrTEEEFKK	sp|P30101|PDIA3_HUMAN(pre=K,post=F)	3	629.999	1	0	0	0	0	0	0	0	0	0.127083	0	Valid
265	20160312_05_A4.14425.14425.2 File:"20160312_05_A4.raw", NativeID:"controllerType=0 controllerNumber=1 scan=14425"	SR+0.984TSVQTEDDQLIAGQSAR	SrTSVQTEDDQLIAGQSAR	sp|P35221|CTNA1_HUMAN(pre=R,post=A);sp|P35221-2|CTNA1_HUMAN(pre=R,post=A);sp|P35221-3|CTNA1_HUMAN(pre=R,post=A);sp|P26232|CTNA2_HUMAN(pre=R,post=A);sp|P26232-2|CTNA2_HUMAN(pre=R,post=A);sp|P26232-3|CTNA2_HUMAN(pre=R,post=A);sp|P26232-4|CTNA2_HUMAN(pre=R,post=A);sp|P26232-5|CTNA2_HUMAN(pre=R,post=A);sp|P26232-6|CTNA2_HUMAN(pre=R,post=A);tr|G3XAM7|G3XAM7_HUMAN(pre=R,post=A);tr|A0A0A0MRI5|A0A0A0MRI5…	2	1032	1	0	1	0	1	0	3	3	0	0.731962	1	Valid
266	20160312_05_A4.15641.15641.4 File:"20160312_05_A4.raw", NativeID:"controllerType=0 controllerNumber=1 scan=15641"	R+0.984NLDIERPTYTNLNR	rNLDIERPTYTNLNR	sp|Q6PEY2|TBA3E_HUMAN(pre=R,post=L);sp|P0DPH7|TBA3C_HUMAN(pre=R,post=L);sp|P0DPH7-2|TBA3C_HUMAN(pre=R,post=L);sp|Q9NY65|TBA8_HUMAN(pre=R,post=L);sp|Q9NY65-2|TBA8_HUMAN(pre=R,post=L);sp|P68363|TBA1B_HUMAN(pre=R,post=L);sp|Q9BQE3|TBA1C_HUMAN(pre=R,post=L);sp|P0DPH8|TBA3D_HUMAN(pre=R,post=L);sp|Q71U36|TBA1A_HUMAN(pre=R,post=L);sp|Q71U36-2|TBA1A_HUMAN(pre=R,post=L);sp|P68366|TBA4A_HUMAN(pre=R,post=L)…	4	469.748	1	0	1	0	1	0	0	0	0	0.278664	0	Valid
267	20160312_05_A4.15682.15682.4 File:"20160312_05_A4.raw", NativeID:"controllerType=0 controllerNumber=1 scan=15682"	TQAQTR+0.984QASTLIDRPAPHFER	TQAQTrQASTLIDRPAPHFER	sp|O43491|E41L2_HUMAN(pre=R,post=T);sp|O43491-2|E41L2_HUMAN(pre=R,post=T);sp|O43491-3|E41L2_HUMAN(pre=R,post=T);sp|O43491-4|E41L2_HUMAN(pre=R,post=T);tr|E9PHY5|E9PHY5_HUMAN(pre=R,post=T);tr|E9PK52|E9PK52_HUMAN(pre=R,post=T);tr|E9PII3|E9PII3_HUMAN(pre=R,post=T);tr|H0Y5B0|H0Y5B0_HUMAN(pre=R,post=T);tr|A0A2R8Y5B3|A0A2R8Y5B3_HUMAN(pre=R,post=T)	4	606.815	1	0	2	0	2	0	0	0	0	0.5062	1	Valid
268	20160312_05_A4.16465.16465.4 File:"20160312_05_A4.raw", NativeID:"controllerType=0 controllerNumber=1 scan=16465"	SSASFSTTAVSAR+0.984YGHWHK	SSASFSTTAVSArYGHWHK	sp|P61764|STXB1_HUMAN(pre=R,post=N);sp|P61764-2|STXB1_HUMAN(pre=R,post=N);tr|A0A0D9SG72|A0A0D9SG72_HUMAN(pre=R,post=N);tr|A0A1B0GWF2|A0A1B0GWF2_HUMAN(pre=R,post=N);tr|A0A1B0GTP9|A0A1B0GTP9_HUMAN(pre=R,post=N);tr|A0A096LP52|A0A096LP52_HUMAN(pre=R,post=N);tr|A0A1B0GVQ5|A0A1B0GVQ5_HUMAN(pre=R,post=N);tr|A0A2R8Y5D4|A0A2R8Y5D4_HUMAN(pre=R,post=N)	4	521.002	1	0	3	1	4	0	0	0	0	0.878318	1	Valid
269	20160312_05_A4.16477.16477.3 File:"20160312_05_A4.raw", NativeID:"controllerType=0 controllerNumber=1 scan=16477"	SSASFSTTAVSAR+0.984YGHWHK	SSASFSTTAVSArYGHWHK	sp|P61764|STXB1_HUMAN(pre=R,post=N);sp|P61764-2|STXB1_HUMAN(pre=R,post=N);tr|A0A0D9SG72|A0A0D9SG72_HUMAN(pre=R,post=N);tr|A0A1B0GWF2|A0A1B0GWF2_HUMAN(pre=R,post=N);tr|A0A1B0GTP9|A0A1B0GTP9_HUMAN(pre=R,post=N);tr|A0A096LP52|A0A096LP52_HUMAN(pre=R,post=N);tr|A0A1B0GVQ5|A0A1B0GVQ5_HUMAN(pre=R,post=N);tr|A0A2R8Y5D4|A0A2R8Y5D4_HUMAN(pre=R,post=N)	3	694.333	1	0	2	0	2	0	0	0	0	0.5062	1	Valid
270	20160312_05_A4.17284.17284.4 File:"20160312_05_A4.raw", NativeID:"controllerType=0 controllerNumber=1 scan=17284"	AR+0.984VDSM+15.995VRHQ+0.984ESLQ+0.984AKQR	ArVDSmVRHqESLqAKQR	sp|Q569K6|CC157_HUMAN(pre=K,post=A)	4	540.273	1	0	3	0	3	0	0	0	0	0.731196	1	Valid
271	20160312_05_A4.18859.18859.5 File:"20160312_05_A4.raw", NativeID:"controllerType=0 controllerNumber=1 scan=18859"	DRDR+0.984PKRR+0.984GFDR+0.984FGPDGTGR	DRDrPKRrGFDrFGPDGTGR	sp|O43823|AKAP8_HUMAN(pre=R,post=K);tr|M0QYL4|M0QYL4_HUMAN(pre=R,post=K)	5	473.637	3	0	0	0	0	0	0	0	0	0.127083	0	Valid
272	20160312_05_A4.1929.1929.3 File:"20160312_05_A4.raw", NativeID:"controllerType=0 controllerNumber=1 scan=1929"	NAR+0.984PEPGAR	NArPEPGAR	sp|Q96G97-4|BSCL2_HUMAN(pre=R,post=H);tr|J3KQ12|J3KQ12_HUMAN(pre=R,post=H);tr|E9PSB5|E9PSB5_HUMAN(pre=R,post=H);tr|E9PJK0|E9PJK0_HUMAN(pre=R,post=H);tr|H7BXM1|H7BXM1_HUMAN(pre=R,post=H);tr|E9PIU3|E9PIU3_HUMAN(pre=R,post=H)	3	323.502	1	0	1	1	2	2	1	3	0	0.878734	1	Valid
273	20160312_05_A4.19406.19406.4 File:"20160312_05_A4.raw", NativeID:"controllerType=0 controllerNumber=1 scan=19406"	KMNLGVGAYR+0.984DDNGKPYVLPSVR	KMNLGVGAYrDDNGKPYVLPSVR	sp|P00505|AATM_HUMAN(pre=K,post=K);sp|P00505-2|AATM_HUMAN(pre=K,post=K)	4	638.334	1	0	1	3	4	2	0	2	0	0.96375	1	Valid
274	20160312_05_A4.19628.19628.4 File:"20160312_05_A4.raw", NativeID:"controllerType=0 controllerNumber=1 scan=19628"	HFHVPDQGINIYR+0.984KPPIYK	HFHVPDQGINIYrKPPIYK	sp|O14639|ABLM1_HUMAN(pre=K,post=Q);sp|O14639-2|ABLM1_HUMAN(pre=K,post=Q);sp|O14639-6|ABLM1_HUMAN(pre=K,post=Q);tr|A0A0A0MRL6|A0A0A0MRL6_HUMAN(pre=K,post=Q);tr|F8W8M4|F8W8M4_HUMAN(pre=K,post=Q);tr|A0A3B3IS55|A0A3B3IS55_HUMAN(pre=K,post=Q)	4	581.565	1	0	0	1	1	0	0	0	0	0.278664	0	Valid
275	20160312_05_A4.20761.20761.3 File:"20160312_05_A4.raw", NativeID:"controllerType=0 controllerNumber=1 scan=20761"	QHFISFDTDR+0.984SGTVDPQELQK	QHFISFDTDrSGTVDPQELQK	sp|P30626|SORCN_HUMAN(pre=R,post=A);sp|P30626-2|SORCN_HUMAN(pre=R,post=A);sp|P30626-3|SORCN_HUMAN(pre=R,post=A);tr|C9J0K6|C9J0K6_HUMAN(pre=R,post=A)	3	817.06	1	0	0	1	1	2	0	2	0	0.587272	1	Valid
276	20160312_05_A4.22304.22304.4 File:"20160312_05_A4.raw", NativeID:"controllerType=0 controllerNumber=1 scan=22304"	TVTIENHPHLPPPPM+15.995C+57.021SVHPC+57.021R+0.984HAEVM+15.995K	TVTIENHPHLPPPPmcSVHPcrHAEVmK	sp|Q9NT62|ATG3_HUMAN(pre=K,post=K);sp|Q9NT62-2|ATG3_HUMAN(pre=K,post=K)	4	826.893	1	0	1	0	1	0	0	0	0	0.278664	0	Valid
277	20160312_05_A4.22435.22435.3 File:"20160312_05_A4.raw", NativeID:"controllerType=0 controllerNumber=1 scan=22435"	SDVAVPLTLHGYSDLDSEEPGTGGAASR+0.984R	SDVAVPLTLHGYSDLDSEEPGTGGAASrR	sp|Q9H9H5|MA6D1_HUMAN(pre=R,post=G);tr|C9JPF8|C9JPF8_HUMAN(pre=R,post=G);tr|H7BZQ6|H7BZQ6_HUMAN(pre=R,post=G)	3	986.808	1	0	1	0	1	0	0	0	0	0.278664	0	Valid
278	20160312_05_A4.22840.22840.3 File:"20160312_05_A4.raw", NativeID:"controllerType=0 controllerNumber=1 scan=22840"	AAVPSGASTGIYEALELR+0.984DNDK	AAVPSGASTGIYEALELrDNDK	sp|P06733|ENOA_HUMAN(pre=R,post=T);tr|A0A2R8Y6G6|A0A2R8Y6G6_HUMAN(pre=R,post=T);tr|K7ERS8|K7ERS8_HUMAN(pre=R,post=T);tr|A0A2R8YEM5|A0A2R8YEM5_HUMAN(pre=R,post=T);tr|A0A2R8Y798|A0A2R8Y798_HUMAN(pre=R,post=T);tr|A0A2R8Y879|A0A2R8Y879_HUMAN(pre=R,post=T);tr|A0A2R8YEG5|A0A2R8YEG5_HUMAN(pre=R,post=T);tr|K7EM90|K7EM90_HUMAN(pre=R,post=T)	3	760.045	1	0	0	0	0	0	0	0	0	0.127083	0	Valid
279	20160312_05_A4.23380.23380.3 File:"20160312_05_A4.raw", NativeID:"controllerType=0 controllerNumber=1 scan=23380"	DREC+57.021YTHN+0.984GILHILGR+0.984N+0.984ER	DREcYTHnGILHILGrnER	tr|A0A1W2PR75|A0A1W2PR75_HUMAN(pre=K,post=I)	3	786.042	1	0	1	0	1	0	0	0	0	0.278664	0	Ambiguous
280	20160312_05_A4.2360.2360.2 File:"20160312_05_A4.raw", NativeID:"controllerType=0 controllerNumber=1 scan=2360"	R+0.984DSQDGSSYR	rDSQDGSSYR	sp|Q14847|LASP1_HUMAN(pre=R,post=R);sp|Q14847-2|LASP1_HUMAN(pre=R,post=R);sp|Q14847-3|LASP1_HUMAN(pre=R,post=R);tr|C9J9W2|C9J9W2_HUMAN(pre=R,post=R);tr|J3KSN1|J3KSN1_HUMAN(pre=-,post=R)	2	586.253	1	0	1	0	1	0	0	0	1	0.861678	1	Valid
281	20160312_05_A4.25038.25038.3 File:"20160312_05_A4.raw", NativeID:"controllerType=0 controllerNumber=1 scan=25038"	DLGEGEEGELAPPEDLLGR+0.984PQ+0.984ALSR	DLGEGEEGELAPPEDLLGrPqALSR	sp|Q8NC44|RETR2_HUMAN(pre=R,post=Q);tr|H7C3D5|H7C3D5_HUMAN(pre=R,post=Q)	3	884.1	1	0	1	1	2	0	0	0	0	0.5062	1	Valid
282	20160312_05_A4.25249.25249.3 File:"20160312_05_A4.raw", NativeID:"controllerType=0 controllerNumber=1 scan=25249"	TR+0.984EGNDLYHEMIESGVINLK	TrEGNDLYHEMIESGVINLK	tr|H0YH81|H0YH81_HUMAN(pre=R,post=D);tr|F8W0P7|F8W0P7_HUMAN(pre=R,post=D);tr|F8W079|F8W079_HUMAN(pre=R,post=D);tr|H0YI37|H0YI37_HUMAN(pre=R,post=D);sp|P06576|ATPB_HUMAN(pre=R,post=D)	3	773.715	1	0	0	1	1	0	0	0	0	0.278664	0	Valid
283	20160312_05_A4.25434.25434.3 File:"20160312_05_A4.raw", NativeID:"controllerType=0 controllerNumber=1 scan=25434"	TDLNPDNLQGGDDLDPNYVLSSR+0.984VR+0.984TGR	TDLNPDNLQGGDDLDPNYVLSSrVrTGR	sp|P12277|KCRB_HUMAN(pre=K,post=S);tr|G3V4N7|G3V4N7_HUMAN(pre=K,post=S);tr|G3V461|G3V461_HUMAN(pre=K,post=S)	3	1030.5	2	0	10	1	11	0	0	0	0	0.99985	1	Valid
284	20160312_05_A4.25567.25567.3 File:"20160312_05_A4.raw", NativeID:"controllerType=0 controllerNumber=1 scan=25567"	TR+0.984EGNDLYHEMIESGVINLK	TrEGNDLYHEMIESGVINLK	tr|H0YH81|H0YH81_HUMAN(pre=R,post=D);tr|F8W0P7|F8W0P7_HUMAN(pre=R,post=D);tr|F8W079|F8W079_HUMAN(pre=R,post=D);tr|H0YI37|H0YI37_HUMAN(pre=R,post=D);sp|P06576|ATPB_HUMAN(pre=R,post=D)	3	773.715	1	0	1	1	2	0	0	0	0	0.5062	1	Valid
285	20160312_05_A4.25591.25591.2 File:"20160312_05_A4.raw", NativeID:"controllerType=0 controllerNumber=1 scan=25591"	TR+0.984EGNDLYHEMIESGVINLK	TrEGNDLYHEMIESGVINLK	tr|H0YH81|H0YH81_HUMAN(pre=R,post=D);tr|F8W0P7|F8W0P7_HUMAN(pre=R,post=D);tr|F8W079|F8W079_HUMAN(pre=R,post=D);tr|H0YI37|H0YI37_HUMAN(pre=R,post=D);sp|P06576|ATPB_HUMAN(pre=R,post=D)	2	1160.07	1	0	0	0	0	0	0	0	0	0.127083	0	Valid
286	20160312_05_A4.26094.26094.2 File:"20160312_05_A4.raw", NativeID:"controllerType=0 controllerNumber=1 scan=26094"	YLTVAAIFR+0.984GR	YLTVAAIFrGR	sp|Q9BVA1|TBB2B_HUMAN(pre=R,post=M);sp|Q13885|TBB2A_HUMAN(pre=R,post=M)	2	634.362	1	0	6	1	7	1	0	1	0	0.996151	1	Valid
287	20160312_05_A4.28469.28469.4 File:"20160312_05_A4.raw", NativeID:"controllerType=0 controllerNumber=1 scan=28469"	EKLEMEMEAAR+0.984HEHQVM+15.995LM+15.995RQDLMR	EKLEMEMEAArHEHQVmLmRQDLMR	sp|Q15233|NONO_HUMAN(pre=R,post=R);sp|Q15233-2|NONO_HUMAN(pre=R,post=R);tr|C9JYS8|C9JYS8_HUMAN(pre=R,post=R);tr|H7C367|H7C367_HUMAN(pre=R,post=R)	4	794.372	1	0	0	2	2	0	0	0	0	0.5062	1	Valid
288	20160312_05_A4.28901.28901.3 File:"20160312_05_A4.raw", NativeID:"controllerType=0 controllerNumber=1 scan=28901"	GHYTEGAELVDSVLDVVR+0.984K	GHYTEGAELVDSVLDVVrK	sp|Q9BVA1|TBB2B_HUMAN(pre=K,post=E);sp|P07437|TBB5_HUMAN(pre=K,post=E);sp|Q13509|TBB3_HUMAN(pre=K,post=E);sp|Q13509-2|TBB3_HUMAN(pre=K,post=E);sp|P68371|TBB4B_HUMAN(pre=K,post=E);sp|Q13885|TBB2A_HUMAN(pre=K,post=E);tr|Q5ST81|Q5ST81_HUMAN(pre=K,post=E);tr|G3V2A3|G3V2A3_HUMAN(pre=K,post=E);tr|Q5JP53|Q5JP53_HUMAN(pre=K,post=E);tr|A0A0B4J269|A0A0B4J269_HUMAN(pre=K,post=E)	3	696.692	1	0	3	1	4	1	0	1	0	0.932673	1	Valid
289	20160312_05_A4.28998.28998.3 File:"20160312_05_A4.raw", NativeID:"controllerType=0 controllerNumber=1 scan=28998"	R+0.984NGAAGPHSPDPLLDEQAFGDLTDLPVVPK	rNGAAGPHSPDPLLDEQAFGDLTDLPVVPK	sp|Q9H3Q1|BORG4_HUMAN(pre=R,post=A);sp|Q9H3Q1-2|BORG4_HUMAN(pre=R,post=A)	3	1043.2	1	0	0	0	0	0	0	0	0	0.127083	0	Ambiguous
290	20160312_05_A4.33447.33447.3 File:"20160312_05_A4.raw", NativeID:"controllerType=0 controllerNumber=1 scan=33447"	VLAAGSSLEEGGEFDDLVSALR+0.984SGEVFDK	VLAAGSSLEEGGEFDDLVSALrSGEVFDK	sp|Q86T65|DAAM2_HUMAN(pre=K,post=D);sp|Q86T65-4|DAAM2_HUMAN(pre=K,post=D);tr|A0A0J9YYF7|A0A0J9YYF7_HUMAN(pre=K,post=D)	3	1000.16	1	0	1	0	1	0	0	0	0	0.278664	0	Valid
291	20160312_05_A4.4473.4473.4 File:"20160312_05_A4.raw", NativeID:"controllerType=0 controllerNumber=1 scan=4473"	LGIHEDSQNR+0.984K	LGIHEDSQNrK	sp|P07900|HS90A_HUMAN(pre=K,post=K);sp|P07900-2|HS90A_HUMAN(pre=K,post=K)	4	325.168	1	0	0	0	0	0	0	0	0	0.127083	0	Ambiguous
292	20160312_05_A4.4599.4599.2 File:"20160312_05_A4.raw", NativeID:"controllerType=0 controllerNumber=1 scan=4599"	REPLPSR+0.984R	REPLPSrR	sp|P38159|RBMX_HUMAN(pre=R,post=D);sp|P38159-2|RBMX_HUMAN(pre=R,post=D);sp|Q96E39|RMXL1_HUMAN(pre=R,post=D);tr|H0Y6E7|H0Y6E7_HUMAN(pre=R,post=D);tr|H3BUY5|H3BUY5_HUMAN(pre=R,post=D);tr|H3BT71|H3BT71_HUMAN(pre=R,post=D)	2	506.289	1	1	2	0	3	0	0	0	0	0.731196	1	Valid
293	20160312_05_A4.5457.5457.3 File:"20160312_05_A4.raw", NativeID:"controllerType=0 controllerNumber=1 scan=5457"	RR+0.984YVETPR	RrYVETPR	sp|P07196|NFL_HUMAN(pre=K,post=V);tr|A0A0S2Z436|A0A0S2Z436_HUMAN(pre=K,post=V);tr|A0A087X0W2|A0A087X0W2_HUMAN(pre=K,post=V)	3	359.865	1	0	5	0	5	0	0	0	0	0.950382	1	Valid
294	20160312_05_A4.5674.5674.2 File:"20160312_05_A4.raw", NativeID:"controllerType=0 controllerNumber=1 scan=5674"	RVTETR+0.984SSFSR	RVTETrSSFSR	sp|P07197|NFM_HUMAN(pre=R,post=V);tr|E7EMV2|E7EMV2_HUMAN(pre=R,post=V);tr|E7ESP9|E7ESP9_HUMAN(pre=R,post=V)	2	663.842	1	3	5	0	8	0	0	0	0	0.997214	1	Valid
295	20160312_05_A4.7472.7472.3 File:"20160312_05_A4.raw", NativeID:"controllerType=0 controllerNumber=1 scan=7472"	R+0.984R+0.984LQ+0.984QQ+0.984ELR	rrLqQqELR	sp|O00139|KIF2A_HUMAN(pre=K,post=E);sp|O00139-1|KIF2A_HUMAN(pre=K,post=E);sp|O00139-2|KIF2A_HUMAN(pre=K,post=E);sp|O00139-4|KIF2A_HUMAN(pre=K,post=E);sp|O00139-5|KIF2A_HUMAN(pre=K,post=E);tr|D6R9M0|D6R9M0_HUMAN(pre=K,post=E)	3	410.887	2	0	0	0	0	0	0	0	0	0.127083	0	Valid
296	20160312_05_A4.7555.7555.2 File:"20160312_05_A4.raw", NativeID:"controllerType=0 controllerNumber=1 scan=7555"	EPSTVSR+0.984DEVR	EPSTVSrDEVR	sp|P11137|MTAP2_HUMAN(pre=K,post=R);sp|P11137-3|MTAP2_HUMAN(pre=K,post=R)	2	638.313	1	0	2	0	2	0	0	0	0	0.5062	1	Valid
297	20160312_05_A4.7641.7641.2 File:"20160312_05_A4.raw", NativeID:"controllerType=0 controllerNumber=1 scan=7641"	R+0.984GEGAEPQYVDK	rGEGAEPQYVDK	sp|Q9H479|FN3K_HUMAN(pre=R,post=F)	2	675.321	1	0	1	0	1	0	0	0	0	0.278664	0	Valid
298	20160312_05_A4.7902.7902.3 File:"20160312_05_A4.raw", NativeID:"controllerType=0 controllerNumber=1 scan=7902"	FR+0.984EEEQ+0.984LLQ+0.984ER	FrEEEqLLqER	sp|Q07283|TRHY_HUMAN(pre=K,post=E)	3	493.904	1	0	0	1	1	1	1	2	0	0.587272	1	Valid
299	20160312_05_A4.8026.8026.2 File:"20160312_05_A4.raw", NativeID:"controllerType=0 controllerNumber=1 scan=8026"	YESER+0.984R+0.984LGSER	YESErrLGSER	sp|P20916|MAG_HUMAN(pre=K,post=R);sp|P20916-3|MAG_HUMAN(pre=K,post=R)	2	692.329	2	1	4	0	5	0	0	0	0	0.950382	1	Valid
300	20160312_05_A4.8224.8224.3 File:"20160312_05_A4.raw", NativeID:"controllerType=0 controllerNumber=1 scan=8224"	R+0.984TTQRIVAPPGGR	rTTQRIVAPPGGR	sp|Q16555|DPYL2_HUMAN(pre=R,post=A);sp|Q16555-2|DPYL2_HUMAN(pre=R,post=A);tr|A0A1C7CYX9|A0A1C7CYX9_HUMAN(pre=R,post=A)	3	470.604	1	0	3	0	3	0	0	0	0	0.731196	1	Valid
301	20160312_05_A4.8244.8244.4 File:"20160312_05_A4.raw", NativeID:"controllerType=0 controllerNumber=1 scan=8244"	KPSKSPNTSR+0.984SKDPR	KPSKSPNTSrSKDPR	sp|Q8NCT3|K0895_HUMAN(pre=R,post=R);sp|Q8NCT3-2|K0895_HUMAN(pre=R,post=R);sp|Q8NCT3-3|K0895_HUMAN(pre=R,post=R);sp|Q8NCT3-4|K0895_HUMAN(pre=R,post=R);sp|Q8NCT3-6|K0895_HUMAN(pre=R,post=R)	4	422.229	1	0	0	0	0	0	1	1	1	0.818364	1	Valid
302	20160312_05_A4.9780.9780.2 File:"20160312_05_A4.raw", NativeID:"controllerType=0 controllerNumber=1 scan=9780"	QLER+0.984QQLETEK	QLErQQLETEK	sp|P15311|EZRI_HUMAN(pre=K,post=K);tr|E7EQR4|E7EQR4_HUMAN(pre=K,post=K)	2	701.863	1	1	1	1	3	1	0	1	0	0.839242	1	Valid
303	20160312_06_A5.10244.10244.4 File:"20160312_06_A5.raw", NativeID:"controllerType=0 controllerNumber=1 scan=10244"	R+0.984TNSSEQERTGLPR	rTNSSEQERTGLPR	sp|Q9Y2I8|WDR37_HUMAN(pre=R,post=D);sp|Q9Y2I8-2|WDR37_HUMAN(pre=R,post=D);sp|Q9Y2I8-3|WDR37_HUMAN(pre=R,post=D);tr|A0A3B3IT47|A0A3B3IT47_HUMAN(pre=R,post=D);tr|A0A087WTQ2|A0A087WTQ2_HUMAN(pre=R,post=D);tr|E7EQ49|E7EQ49_HUMAN(pre=R,post=D)	4	408.708	1	0	0	0	0	0	0	0	0	0.127083	0	Valid
304	20160312_06_A5.11600.11600.3 File:"20160312_06_A5.raw", NativeID:"controllerType=0 controllerNumber=1 scan=11600"	R+0.984VQ+0.984DLSAGGQ+0.984GSLTDSGPER	rVqDLSAGGqGSLTDSGPER	sp|P40222|TXLNA_HUMAN(pre=K,post=R)	3	678.319	1	0	2	0	2	0	0	0	0	0.5062	1	Valid
305	20160312_06_A5.11880.11880.3 File:"20160312_06_A5.raw", NativeID:"controllerType=0 controllerNumber=1 scan=11880"	TYNR+0.984VPLHKPTDWQK	TYNrVPLHKPTDWQK	sp|Q96A26|F162A_HUMAN(pre=R,post=K);tr|E9PH05|E9PH05_HUMAN(pre=R,post=K);tr|F8W7Q4|F8W7Q4_HUMAN(pre=R,post=K)	3	628.664	1	0	1	0	1	0	0	0	0	0.278664	0	Valid
306	20160312_06_A5.12485.12485.3 File:"20160312_06_A5.raw", NativeID:"controllerType=0 controllerNumber=1 scan=12485"	WQ+0.984KSMTN+0.984R+0.984TR+0.984EVLLPK	WqKSMTnrTrEVLLPK	sp|P05546|HEP2_HUMAN(pre=R,post=F)	3	664.348	2	0	1	0	1	0	0	0	0	0.278664	0	Ambiguous
307	20160312_06_A5.12639.12639.3 File:"20160312_06_A5.raw", NativeID:"controllerType=0 controllerNumber=1 scan=12639"	R+0.984ILIPSDIESSKSSTR+0.984RM+15.995KSSC+57.021DRER	rILIPSDIESSKSSTrRmKSScDRER	sp|P30414|NKTR_HUMAN(pre=R,post=S);tr|A0A087WYW3|A0A087WYW3_HUMAN(pre=R,post=S)	3	1038.19	2	0	1	1	2	0	0	0	0	0.5062	1	Valid
308	20160312_06_A5.12814.12814.3 File:"20160312_06_A5.raw", NativeID:"controllerType=0 controllerNumber=1 scan=12814"	EQERVLR+0.984EQ+0.984VQR	EQERVLrEqVQR	sp|A0MZ66|SHOT1_HUMAN(pre=K,post=K);sp|A0MZ66-2|SHOT1_HUMAN(pre=K,post=K);sp|A0MZ66-3|SHOT1_HUMAN(pre=K,post=K);sp|A0MZ66-4|SHOT1_HUMAN(pre=K,post=K);sp|A0MZ66-5|SHOT1_HUMAN(pre=K,post=K);sp|A0MZ66-6|SHOT1_HUMAN(pre=K,post=K);sp|A0MZ66-8|SHOT1_HUMAN(pre=K,post=K)	3	524.61	1	0	2	0	2	0	0	0	0	0.5062	1	Valid
309	20160312_06_A5.13777.13777.4 File:"20160312_06_A5.raw", NativeID:"controllerType=0 controllerNumber=1 scan=13777"	SVANSGLSDSLTTSTPR+0.984PSNGDSPSHPYHR	SVANSGLSDSLTTSTPrPSNGDSPSHPYHR	sp|Q7RTN6|STRAA_HUMAN(pre=R,post=T);sp|Q7RTN6-2|STRAA_HUMAN(pre=R,post=T);sp|Q7RTN6-3|STRAA_HUMAN(pre=R,post=T);sp|Q7RTN6-5|STRAA_HUMAN(pre=R,post=T);tr|A0A1W2PPM8|A0A1W2PPM8_HUMAN(pre=R,post=T);tr|A0A1W2PQF1|A0A1W2PQF1_HUMAN(pre=R,post=T);tr|A0A1W2PPJ9|A0A1W2PPJ9_HUMAN(pre=R,post=T)	4	782.119	1	0	1	1	2	0	0	0	0	0.5062	1	Valid
310	20160312_06_A5.14715.14715.4 File:"20160312_06_A5.raw", NativeID:"controllerType=0 controllerNumber=1 scan=14715"	TVAGSEEPVHDR+0.984YRPTIEMER	TVAGSEEPVHDrYRPTIEMER	sp|Q96PE5|OPALI_HUMAN(pre=K,post=R);sp|Q96PE5-2|OPALI_HUMAN(pre=K,post=R);sp|Q96PE5-3|OPALI_HUMAN(pre=K,post=R);sp|Q96PE5-4|OPALI_HUMAN(pre=K,post=R);tr|A0A0A0MTN4|A0A0A0MTN4_HUMAN(pre=K,post=R);tr|A0A0A0MS47|A0A0A0MS47_HUMAN(pre=K,post=R)	4	619.05	1	0	18	2	20	0	0	0	0	1	1	Valid
311	20160312_06_A5.14732.14732.3 File:"20160312_06_A5.raw", NativeID:"controllerType=0 controllerNumber=1 scan=14732"	TVAGSEEPVHDR+0.984YRPTIEMER	TVAGSEEPVHDrYRPTIEMER	sp|Q96PE5|OPALI_HUMAN(pre=K,post=R);sp|Q96PE5-2|OPALI_HUMAN(pre=K,post=R);sp|Q96PE5-3|OPALI_HUMAN(pre=K,post=R);sp|Q96PE5-4|OPALI_HUMAN(pre=K,post=R);tr|A0A0A0MTN4|A0A0A0MTN4_HUMAN(pre=K,post=R);tr|A0A0A0MS47|A0A0A0MS47_HUMAN(pre=K,post=R)	3	825.065	1	0	11	3	14	1	0	1	0	0.999996	1	Valid
312	20160312_06_A5.1496.1496.2 File:"20160312_06_A5.raw", NativeID:"controllerType=0 controllerNumber=1 scan=1496"	GKPVPTQGSR+0.984K	GKPVPTQGSrK	sp|P09543|CN37_HUMAN(pre=K,post=G);sp|P09543-2|CN37_HUMAN(pre=K,post=G)	2	578.328	1	0	2	1	3	0	0	0	0	0.731196	1	Valid
313	20160312_06_A5.15472.15472.4 File:"20160312_06_A5.raw", NativeID:"controllerType=0 controllerNumber=1 scan=15472"	M+15.995SR+0.984EM+15.995QDVDLAEVKPLVEC+57.021NSK	mSrEmQDVDLAEVKPLVEcNSK	tr|E7ESM1|E7ESM1_HUMAN(pre=-,post=L)	4	653.557	1	0	2	1	3	0	0	0	0	0.731196	1	Valid
314	20160312_06_A5.1662.1662.2 File:"20160312_06_A5.raw", NativeID:"controllerType=0 controllerNumber=1 scan=1662"	GKPVPTQGSR+0.984K	GKPVPTQGSrK	sp|P09543|CN37_HUMAN(pre=K,post=G);sp|P09543-2|CN37_HUMAN(pre=K,post=G)	2	578.328	1	0	2	1	3	0	0	0	0	0.731196	1	Valid
315	20160312_06_A5.16714.16714.2 File:"20160312_06_A5.raw", NativeID:"controllerType=0 controllerNumber=1 scan=16714"	SHGR+0.984TQDENPVVHFFK	SHGrTQDENPVVHFFK	tr|H7BYR8|H7BYR8_HUMAN(pre=K,post=N);sp|P02686|MBP_HUMAN(pre=K,post=N);sp|P02686-3|MBP_HUMAN(pre=K,post=N);sp|P02686-4|MBP_HUMAN(pre=K,post=N);sp|P02686-5|MBP_HUMAN(pre=K,post=N);sp|P02686-6|MBP_HUMAN(pre=K,post=N);tr|C9J6H1|C9J6H1_HUMAN(pre=K,post=N);tr|J3QL64|J3QL64_HUMAN(pre=K,post=N);tr|E9PJ72|E9PJ72_HUMAN(pre=K,post=N);tr|J3QKL5|J3QKL5_HUMAN(pre=K,post=N);tr|J3KT01|J3KT01_HUMAN(pre=K,post=N)…	2	949.961	1	1	1	0	2	0	0	0	0	0.5062	1	Valid
316	20160312_06_A5.16741.16741.3 File:"20160312_06_A5.raw", NativeID:"controllerType=0 controllerNumber=1 scan=16741"	KLAAGHELQPLAIVDQRPSSR+0.984ASSR	KLAAGHELQPLAIVDQRPSSrASSR	sp|P17302|CXA1_HUMAN(pre=K,post=A)	3	896.823	1	0	5	0	5	0	0	0	0	0.950382	1	Valid
317	20160312_06_A5.16746.16746.3 File:"20160312_06_A5.raw", NativeID:"controllerType=0 controllerNumber=1 scan=16746"	SHGR+0.984TQDENPVVHFFK	SHGrTQDENPVVHFFK	tr|H7BYR8|H7BYR8_HUMAN(pre=K,post=N);sp|P02686|MBP_HUMAN(pre=K,post=N);sp|P02686-3|MBP_HUMAN(pre=K,post=N);sp|P02686-4|MBP_HUMAN(pre=K,post=N);sp|P02686-5|MBP_HUMAN(pre=K,post=N);sp|P02686-6|MBP_HUMAN(pre=K,post=N);tr|C9J6H1|C9J6H1_HUMAN(pre=K,post=N);tr|J3QL64|J3QL64_HUMAN(pre=K,post=N);tr|E9PJ72|E9PJ72_HUMAN(pre=K,post=N);tr|J3QKL5|J3QKL5_HUMAN(pre=K,post=N);tr|J3KT01|J3KT01_HUMAN(pre=K,post=N)…	3	633.644	1	0	5	1	6	1	0	1	0	0.989852	1	Valid
318	20160312_06_A5.16783.16783.5 File:"20160312_06_A5.raw", NativeID:"controllerType=0 controllerNumber=1 scan=16783"	KLAAGHELQPLAIVDQRPSSR+0.984ASSR	KLAAGHELQPLAIVDQRPSSrASSR	sp|P17302|CXA1_HUMAN(pre=K,post=A)	5	538.497	1	0	6	0	6	0	0	0	0	0.980705	1	Valid
319	20160312_06_A5.16809.16809.5 File:"20160312_06_A5.raw", NativeID:"controllerType=0 controllerNumber=1 scan=16809"	KLAAGHELQPLAIVDQR+0.984PSSRASSRASSR	KLAAGHELQPLAIVDQrPSSRASSRASSR	sp|P17302|CXA1_HUMAN(pre=K,post=P)	5	618.738	1	0	2	0	2	0	0	0	0	0.5062	1	Valid
320	20160312_06_A5.16817.16817.4 File:"20160312_06_A5.raw", NativeID:"controllerType=0 controllerNumber=1 scan=16817"	SHGR+0.984TQDENPVVHFFK	SHGrTQDENPVVHFFK	tr|H7BYR8|H7BYR8_HUMAN(pre=K,post=N);sp|P02686|MBP_HUMAN(pre=K,post=N);sp|P02686-3|MBP_HUMAN(pre=K,post=N);sp|P02686-4|MBP_HUMAN(pre=K,post=N);sp|P02686-5|MBP_HUMAN(pre=K,post=N);sp|P02686-6|MBP_HUMAN(pre=K,post=N);tr|C9J6H1|C9J6H1_HUMAN(pre=K,post=N);tr|J3QL64|J3QL64_HUMAN(pre=K,post=N);tr|E9PJ72|E9PJ72_HUMAN(pre=K,post=N);tr|J3QKL5|J3QKL5_HUMAN(pre=K,post=N);tr|J3KT01|J3KT01_HUMAN(pre=K,post=N)…	4	475.485	1	0	3	1	4	1	0	1	0	0.932673	1	Valid
321	20160312_06_A5.16882.16882.2 File:"20160312_06_A5.raw", NativeID:"controllerType=0 controllerNumber=1 scan=16882"	SHGR+0.984TQDENPVVHFFK	SHGrTQDENPVVHFFK	tr|H7BYR8|H7BYR8_HUMAN(pre=K,post=N);sp|P02686|MBP_HUMAN(pre=K,post=N);sp|P02686-3|MBP_HUMAN(pre=K,post=N);sp|P02686-4|MBP_HUMAN(pre=K,post=N);sp|P02686-5|MBP_HUMAN(pre=K,post=N);sp|P02686-6|MBP_HUMAN(pre=K,post=N);tr|C9J6H1|C9J6H1_HUMAN(pre=K,post=N);tr|J3QL64|J3QL64_HUMAN(pre=K,post=N);tr|E9PJ72|E9PJ72_HUMAN(pre=K,post=N);tr|J3QKL5|J3QKL5_HUMAN(pre=K,post=N);tr|J3KT01|J3KT01_HUMAN(pre=K,post=N)…	2	949.961	1	1	3	0	4	0	0	0	0	0.878318	1	Valid
322	20160312_06_A5.16919.16919.3 File:"20160312_06_A5.raw", NativeID:"controllerType=0 controllerNumber=1 scan=16919"	SHGR+0.984TQDENPVVHFFK	SHGrTQDENPVVHFFK	tr|H7BYR8|H7BYR8_HUMAN(pre=K,post=N);sp|P02686|MBP_HUMAN(pre=K,post=N);sp|P02686-3|MBP_HUMAN(pre=K,post=N);sp|P02686-4|MBP_HUMAN(pre=K,post=N);sp|P02686-5|MBP_HUMAN(pre=K,post=N);sp|P02686-6|MBP_HUMAN(pre=K,post=N);tr|C9J6H1|C9J6H1_HUMAN(pre=K,post=N);tr|J3QL64|J3QL64_HUMAN(pre=K,post=N);tr|E9PJ72|E9PJ72_HUMAN(pre=K,post=N);tr|J3QKL5|J3QKL5_HUMAN(pre=K,post=N);tr|J3KT01|J3KT01_HUMAN(pre=K,post=N)…	3	633.644	1	0	5	1	6	1	0	1	0	0.989852	1	Valid
323	20160312_06_A5.17067.17067.2 File:"20160312_06_A5.raw", NativeID:"controllerType=0 controllerNumber=1 scan=17067"	SHGR+0.984TQDENPVVHFFK	SHGrTQDENPVVHFFK	tr|H7BYR8|H7BYR8_HUMAN(pre=K,post=N);sp|P02686|MBP_HUMAN(pre=K,post=N);sp|P02686-3|MBP_HUMAN(pre=K,post=N);sp|P02686-4|MBP_HUMAN(pre=K,post=N);sp|P02686-5|MBP_HUMAN(pre=K,post=N);sp|P02686-6|MBP_HUMAN(pre=K,post=N);tr|C9J6H1|C9J6H1_HUMAN(pre=K,post=N);tr|J3QL64|J3QL64_HUMAN(pre=K,post=N);tr|E9PJ72|E9PJ72_HUMAN(pre=K,post=N);tr|J3QKL5|J3QKL5_HUMAN(pre=K,post=N);tr|J3KT01|J3KT01_HUMAN(pre=K,post=N)…	2	949.961	1	1	2	0	3	0	0	0	0	0.731196	1	Valid
324	20160312_06_A5.18207.18207.4 File:"20160312_06_A5.raw", NativeID:"controllerType=0 controllerNumber=1 scan=18207"	IQVM+15.995VQPSEDIVR+0.984PENGPEQPQAGSSTSK	IQVmVQPSEDIVrPENGPEQPQAGSSTSK	sp|P30531|SC6A1_HUMAN(pre=R,post=E);tr|B7Z3C5|B7Z3C5_HUMAN(pre=R,post=E);tr|A0A2R8Y867|A0A2R8Y867_HUMAN(pre=R,post=E);tr|A0A2R8YDD5|A0A2R8YDD5_HUMAN(pre=R,post=E);tr|A0A2R8Y4I3|A0A2R8Y4I3_HUMAN(pre=R,post=E)	4	782.132	1	0	0	1	1	0	0	0	0	0.278664	0	Valid
325	20160312_06_A5.18402.18402.3 File:"20160312_06_A5.raw", NativeID:"controllerType=0 controllerNumber=1 scan=18402"	AAPTTPPPPVKRR+0.984DR	AAPTTPPPPVKRrDR	sp|Q9NZQ3|SPN90_HUMAN(pre=R,post=E);sp|Q9NZQ3-2|SPN90_HUMAN(pre=R,post=E);sp|Q9NZQ3-3|SPN90_HUMAN(pre=R,post=E);sp|Q9NZQ3-4|SPN90_HUMAN(pre=R,post=E);sp|Q9NZQ3-5|SPN90_HUMAN(pre=R,post=E);tr|C9JMQ4|C9JMQ4_HUMAN(pre=R,post=E);tr|C9JC20|C9JC20_HUMAN(pre=R,post=E);tr|C9JSC3|C9JSC3_HUMAN(pre=R,post=E)	3	553.982	1	0	0	0	0	0	0	0	0	0.127083	0	Ambiguous
326	20160312_06_A5.18654.18654.2 File:"20160312_06_A5.raw", NativeID:"controllerType=0 controllerNumber=1 scan=18654"	R+0.984M+15.995KFKTVC+57.021YLLVQ+0.984LMHC+57.021R	rmKFKTVcYLLVqLMHcR	sp|Q08828|ADCY1_HUMAN(pre=K,post=K);tr|C9J1J0|C9J1J0_HUMAN(pre=K,post=K)	2	1201.1	1	0	1	0	1	0	0	0	0	0.278664	0	Ambiguous
327	20160312_06_A5.18882.18882.3 File:"20160312_06_A5.raw", NativeID:"controllerType=0 controllerNumber=1 scan=18882"	R+0.984NGLLSNQLQSSEDEQAFVSK	rNGLLSNQLQSSEDEQAFVSK	sp|Q9NZV8|KCND2_HUMAN(pre=K,post=S);tr|H7C445|H7C445_HUMAN(pre=K,post=S)	3	784.388	1	0	0	0	0	0	0	0	0	0.127083	0	Ambiguous
328	20160312_06_A5.18953.18953.5 File:"20160312_06_A5.raw", NativeID:"controllerType=0 controllerNumber=1 scan=18953"	TLPN+0.984GR+0.984DALDGPAAEAEPEHSFDGLRR	TLPnGrDALDGPAAEAEPEHSFDGLRR	sp|Q15149|PLEC_HUMAN(pre=K,post=K);sp|Q15149-2|PLEC_HUMAN(pre=K,post=K);sp|Q15149-3|PLEC_HUMAN(pre=K,post=K);sp|Q15149-4|PLEC_HUMAN(pre=K,post=K);sp|Q15149-5|PLEC_HUMAN(pre=K,post=K);sp|Q15149-6|PLEC_HUMAN(pre=K,post=K);sp|Q15149-7|PLEC_HUMAN(pre=K,post=K);sp|Q15149-8|PLEC_HUMAN(pre=K,post=K);sp|Q15149-9|PLEC_HUMAN(pre=K,post=K);tr|H0YDN1|H0YDN1_HUMAN(pre=K,post=K)	5	579.481	1	0	0	0	0	0	0	0	0	0.127083	0	Ambiguous
329	20160312_06_A5.19145.19145.4 File:"20160312_06_A5.raw", NativeID:"controllerType=0 controllerNumber=1 scan=19145"	KLDPAQSASR+0.984ENLLEEQGSIALR	KLDPAQSASrENLLEEQGSIALR	sp|Q13813|SPTN1_HUMAN(pre=K,post=Q);sp|Q13813-2|SPTN1_HUMAN(pre=K,post=Q);sp|Q13813-3|SPTN1_HUMAN(pre=K,post=Q);tr|A0A0D9SF54|A0A0D9SF54_HUMAN(pre=K,post=Q);tr|A0A0D9SGF6|A0A0D9SGF6_HUMAN(pre=K,post=Q)	4	632.335	1	0	1	0	1	0	0	0	0	0.278664	0	Valid
330	20160312_06_A5.19282.19282.3 File:"20160312_06_A5.raw", NativeID:"controllerType=0 controllerNumber=1 scan=19282"	DLFDPIIEDR+0.984HGGYKPSDEHK	DLFDPIIEDrHGGYKPSDEHK	sp|P12277|KCRB_HUMAN(pre=K,post=T);tr|G3V4N7|G3V4N7_HUMAN(pre=K,post=T);tr|G3V461|G3V461_HUMAN(pre=K,post=T)	3	823.728	1	0	4	7	11	1	0	1	0	0.999922	1	Valid
331	20160312_06_A5.19296.19296.5 File:"20160312_06_A5.raw", NativeID:"controllerType=0 controllerNumber=1 scan=19296"	DLFDPIIEDR+0.984HGGYKPSDEHK	DLFDPIIEDrHGGYKPSDEHK	sp|P12277|KCRB_HUMAN(pre=K,post=T);tr|G3V4N7|G3V4N7_HUMAN(pre=K,post=T);tr|G3V461|G3V461_HUMAN(pre=K,post=T)	5	494.64	1	0	0	8	8	2	2	4	0	0.999794	1	Valid
332	20160312_06_A5.19305.19305.2 File:"20160312_06_A5.raw", NativeID:"controllerType=0 controllerNumber=1 scan=19305"	DLFDPIIEDR+0.984HGGYKPSDEHK	DLFDPIIEDrHGGYKPSDEHK	sp|P12277|KCRB_HUMAN(pre=K,post=T);tr|G3V4N7|G3V4N7_HUMAN(pre=K,post=T);tr|G3V461|G3V461_HUMAN(pre=K,post=T)	2	1235.09	1	0	0	0	0	0	0	0	0	0.127083	0	Ambiguous
333	20160312_06_A5.19394.19394.4 File:"20160312_06_A5.raw", NativeID:"controllerType=0 controllerNumber=1 scan=19394"	KLDPAQSASR+0.984ENLLEEQGSIALR	KLDPAQSASrENLLEEQGSIALR	sp|Q13813|SPTN1_HUMAN(pre=K,post=Q);sp|Q13813-2|SPTN1_HUMAN(pre=K,post=Q);sp|Q13813-3|SPTN1_HUMAN(pre=K,post=Q);tr|A0A0D9SF54|A0A0D9SF54_HUMAN(pre=K,post=Q);tr|A0A0D9SGF6|A0A0D9SGF6_HUMAN(pre=K,post=Q)	4	632.335	1	0	1	0	1	0	0	0	0	0.278664	0	Valid
334	20160312_06_A5.19708.19708.4 File:"20160312_06_A5.raw", NativeID:"controllerType=0 controllerNumber=1 scan=19708"	IQVMVQPSEDIVR+0.984PEN+0.984GPEQPQAGSSTSK	IQVMVQPSEDIVrPEnGPEQPQAGSSTSK	sp|P30531|SC6A1_HUMAN(pre=R,post=E);tr|B7Z3C5|B7Z3C5_HUMAN(pre=R,post=E);tr|A0A2R8Y867|A0A2R8Y867_HUMAN(pre=R,post=E);tr|A0A2R8YDD5|A0A2R8YDD5_HUMAN(pre=R,post=E);tr|A0A2R8Y4I3|A0A2R8Y4I3_HUMAN(pre=R,post=E)	4	778.38	1	0	0	1	1	0	0	0	0	0.278664	0	Valid
335	20160312_06_A5.2006.2006.2 File:"20160312_06_A5.raw", NativeID:"controllerType=0 controllerNumber=1 scan=2006"	SR+0.984LSSSSSNDSGNK	SrLSSSSSNDSGNK	sp|Q09666|AHNK_HUMAN(pre=K,post=V)	2	713.824	1	0	2	0	2	0	0	0	0	0.5062	1	Valid
336	20160312_06_A5.2024.2024.3 File:"20160312_06_A5.raw", NativeID:"controllerType=0 controllerNumber=1 scan=2024"	GGAAR+0.984PNGPAAGNK	GGAArPNGPAAGNK	sp|P51148|RAB5C_HUMAN(pre=R,post=I);sp|P51148-2|RAB5C_HUMAN(pre=R,post=I);tr|F8VVK3|F8VVK3_HUMAN(pre=R,post=I);tr|F8VWU4|F8VWU4_HUMAN(pre=R,post=I);tr|F8VSF8|F8VSF8_HUMAN(pre=R,post=I);tr|K7ERI8|K7ERI8_HUMAN(pre=R,post=I);tr|K7ERQ8|K7ERQ8_HUMAN(pre=R,post=I)	3	413.547	1	0	0	1	1	1	1	2	0	0.587272	1	Valid
337	20160312_06_A5.20462.20462.3 File:"20160312_06_A5.raw", NativeID:"controllerType=0 controllerNumber=1 scan=20462"	TLPNGR+0.984DALDGPAAEAEPEHSFDGLR	TLPNGrDALDGPAAEAEPEHSFDGLR	sp|Q15149|PLEC_HUMAN(pre=K,post=R);sp|Q15149-2|PLEC_HUMAN(pre=K,post=R);sp|Q15149-3|PLEC_HUMAN(pre=K,post=R);sp|Q15149-4|PLEC_HUMAN(pre=K,post=R);sp|Q15149-5|PLEC_HUMAN(pre=K,post=R);sp|Q15149-6|PLEC_HUMAN(pre=K,post=R);sp|Q15149-7|PLEC_HUMAN(pre=K,post=R);sp|Q15149-8|PLEC_HUMAN(pre=K,post=R);sp|Q15149-9|PLEC_HUMAN(pre=K,post=R);tr|H0YDN1|H0YDN1_HUMAN(pre=K,post=R)	3	912.767	1	0	0	1	1	0	0	0	0	0.278664	0	Valid
338	20160312_06_A5.21667.21667.4 File:"20160312_06_A5.raw", NativeID:"controllerType=0 controllerNumber=1 scan=21667"	IVEVDGMDLR+0.984DASHEQAVEAIR	IVEVDGMDLrDASHEQAVEAIR	sp|O75970|MPDZ_HUMAN(pre=R,post=K);sp|O75970-2|MPDZ_HUMAN(pre=R,post=K);sp|O75970-3|MPDZ_HUMAN(pre=R,post=K);sp|O75970-5|MPDZ_HUMAN(pre=R,post=K);tr|B7ZB24|B7ZB24_HUMAN(pre=R,post=K);tr|F5H1U9|F5H1U9_HUMAN(pre=R,post=K)	4	614.304	1	0	0	1	1	1	0	1	0	0.425753	0	Valid
339	20160312_06_A5.21765.21765.2 File:"20160312_06_A5.raw", NativeID:"controllerType=0 controllerNumber=1 scan=21765"	R+0.984VPFSLLR	rVPFSLLR	sp|P04792|HSPB1_HUMAN(pre=R,post=G);tr|F8WE04|F8WE04_HUMAN(pre=R,post=G)	2	494.801	1	0	0	0	0	0	0	0	0	0.127083	0	Valid
340	20160312_06_A5.22629.22629.2 File:"20160312_06_A5.raw", NativeID:"controllerType=0 controllerNumber=1 scan=22629"	FVQPLLGR+0.984K	FVQPLLGrK	sp|Q52LW3|RHG29_HUMAN(pre=K,post=N);sp|Q52LW3-2|RHG29_HUMAN(pre=K,post=N);tr|F8VWZ8|F8VWZ8_HUMAN(pre=K,post=N)	2	529.822	1	0	0	0	0	0	0	0	0	0.127083	0	Ambiguous
341	20160312_06_A5.22715.22715.3 File:"20160312_06_A5.raw", NativeID:"controllerType=0 controllerNumber=1 scan=22715"	AFVHWYVGEGM+15.995EEGEFSEAR+0.984EDM+15.995AALEK	AFVHWYVGEGmEEGEFSEArEDmAALEK	sp|P68363|TBA1B_HUMAN(pre=R,post=D);sp|P68363-2|TBA1B_HUMAN(pre=R,post=D);sp|Q9BQE3|TBA1C_HUMAN(pre=R,post=D);sp|Q71U36|TBA1A_HUMAN(pre=R,post=D);sp|Q71U36-2|TBA1A_HUMAN(pre=R,post=D);sp|P68366|TBA4A_HUMAN(pre=R,post=D);sp|P68366-2|TBA4A_HUMAN(pre=R,post=D);tr|F5H5D3|F5H5D3_HUMAN(pre=R,post=D)	3	1084.14	1	0	0	0	0	0	0	0	0	0.127083	0	Ambiguous
342	20160312_06_A5.23062.23062.2 File:"20160312_06_A5.raw", NativeID:"controllerType=0 controllerNumber=1 scan=23062"	YLTVAAVFR+0.984GR	YLTVAAVFrGR	sp|P07437|TBB5_HUMAN(pre=R,post=M);sp|P04350|TBB4A_HUMAN(pre=R,post=M);sp|P68371|TBB4B_HUMAN(pre=R,post=M);tr|Q5ST81|Q5ST81_HUMAN(pre=R,post=M);tr|Q5JP53|Q5JP53_HUMAN(pre=R,post=M)	2	627.354	1	0	6	1	7	1	0	1	0	0.996151	1	Valid
343	20160312_06_A5.23590.23590.2 File:"20160312_06_A5.raw", NativeID:"controllerType=0 controllerNumber=1 scan=23590"	DFR+0.984AWPLPR	DFrAWPLPR	sp|Q96JE9|MAP6_HUMAN(pre=K,post=R);sp|Q96JE9-2|MAP6_HUMAN(pre=K,post=R)	2	579.807	1	0	3	1	4	2	0	2	0	0.96375	1	Valid
344	20160312_06_A5.23719.23719.2 File:"20160312_06_A5.raw", NativeID:"controllerType=0 controllerNumber=1 scan=23719"	FR+0.984SLIPSYIR	FrSLIPSYIR	sp|Q9NRW1|RAB6B_HUMAN(pre=R,post=D);sp|Q9NRW1-2|RAB6B_HUMAN(pre=R,post=D);sp|P20340|RAB6A_HUMAN(pre=R,post=D);sp|P20340-2|RAB6A_HUMAN(pre=R,post=D);sp|P20340-4|RAB6A_HUMAN(pre=R,post=D);tr|J3KR73|J3KR73_HUMAN(pre=R,post=D);tr|C9JU14|C9JU14_HUMAN(pre=R,post=D)	2	626.857	1	1	1	0	2	0	0	0	0	0.5062	1	Valid
345	20160312_06_A5.23855.23855.4 File:"20160312_06_A5.raw", NativeID:"controllerType=0 controllerNumber=1 scan=23855"	SQ+0.984VETDDLILKPGVVHVIDVDR+0.984	SqVETDDLILKPGVVHVIDVDr	sp|P55087|AQP4_HUMAN(pre=R,post=G);sp|P55087-2|AQP4_HUMAN(pre=R,post=G)	4	613.077	1	0	2	0	2	0	0	0	0	0.5062	1	Valid
346	20160312_06_A5.23913.23913.4 File:"20160312_06_A5.raw", NativeID:"controllerType=0 controllerNumber=1 scan=23913"	VQ+0.984VDVKM+15.995AILQIM+15.995KELN+0.984KR+0.984GR	VqVDVKmAILQImKELnKrGR	sp|Q13263|TIF1B_HUMAN(pre=R,post=V);sp|Q13263-2|TIF1B_HUMAN(pre=R,post=V);tr|M0R3C0|M0R3C0_HUMAN(pre=R,post=V)	4	626.845	1	0	1	0	1	0	0	0	0	0.278664	0	Valid
347	20160312_06_A5.23988.23988.4 File:"20160312_06_A5.raw", NativeID:"controllerType=0 controllerNumber=1 scan=23988"	NPPSAR+0.984NGGHETDAQILELNQQLVDLK	NPPSArNGGHETDAQILELNQQLVDLK	sp|Q9UPY8|MARE3_HUMAN(pre=K,post=L);sp|Q9UPY8-2|MARE3_HUMAN(pre=K,post=L);tr|C9JB30|C9JB30_HUMAN(pre=K,post=L)	4	740.379	1	0	0	3	3	0	0	0	0	0.731196	1	Valid
348	20160312_06_A5.24438.24438.3 File:"20160312_06_A5.raw", NativeID:"controllerType=0 controllerNumber=1 scan=24438"	AAVPSGASTGIYEALELR+0.984DNDK	AAVPSGASTGIYEALELrDNDK	sp|P06733|ENOA_HUMAN(pre=R,post=T);tr|A0A2R8Y6G6|A0A2R8Y6G6_HUMAN(pre=R,post=T);tr|K7ERS8|K7ERS8_HUMAN(pre=R,post=T);tr|A0A2R8YEM5|A0A2R8YEM5_HUMAN(pre=R,post=T);tr|A0A2R8Y798|A0A2R8Y798_HUMAN(pre=R,post=T);tr|A0A2R8Y879|A0A2R8Y879_HUMAN(pre=R,post=T);tr|A0A2R8YEG5|A0A2R8YEG5_HUMAN(pre=R,post=T);tr|K7EM90|K7EM90_HUMAN(pre=R,post=T)	3	760.045	1	0	5	0	5	0	0	0	0	0.950382	1	Valid
349	20160312_06_A5.24461.24461.2 File:"20160312_06_A5.raw", NativeID:"controllerType=0 controllerNumber=1 scan=24461"	AAVPSGASTGIYEALELR+0.984DNDK	AAVPSGASTGIYEALELrDNDK	sp|P06733|ENOA_HUMAN(pre=R,post=T);tr|A0A2R8Y6G6|A0A2R8Y6G6_HUMAN(pre=R,post=T);tr|K7ERS8|K7ERS8_HUMAN(pre=R,post=T);tr|A0A2R8YEM5|A0A2R8YEM5_HUMAN(pre=R,post=T);tr|A0A2R8Y798|A0A2R8Y798_HUMAN(pre=R,post=T);tr|A0A2R8Y879|A0A2R8Y879_HUMAN(pre=R,post=T);tr|A0A2R8YEG5|A0A2R8YEG5_HUMAN(pre=R,post=T);tr|K7EM90|K7EM90_HUMAN(pre=R,post=T)	2	1139.56	1	0	11	0	11	0	0	0	0	0.99985	1	Valid
350	20160312_06_A5.24659.24659.3 File:"20160312_06_A5.raw", NativeID:"controllerType=0 controllerNumber=1 scan=24659"	TR+0.984EGNDLYHEMIESGVINLK	TrEGNDLYHEMIESGVINLK	tr|H0YH81|H0YH81_HUMAN(pre=R,post=D);tr|F8W0P7|F8W0P7_HUMAN(pre=R,post=D);tr|F8W079|F8W079_HUMAN(pre=R,post=D);tr|H0YI37|H0YI37_HUMAN(pre=R,post=D);sp|P06576|ATPB_HUMAN(pre=R,post=D)	3	773.715	1	0	0	0	0	0	0	0	0	0.127083	0	Valid
351	20160312_06_A5.24911.24911.5 File:"20160312_06_A5.raw", NativeID:"controllerType=0 controllerNumber=1 scan=24911"	FQ+0.984R+0.984TPVR+0.984Q+0.984SVR+0.984R+0.984IN+0.984SLLEYSR	FqrTPVrqSVrrInSLLEYSR	sp|Q6P4F7|RHGBA_HUMAN(pre=K,post=Q);sp|Q6P4F7-3|RHGBA_HUMAN(pre=K,post=Q)	5	523.273	4	0	0	1	1	1	0	1	0	0.425753	0	Ambiguous
352	20160312_06_A5.25482.25482.5 File:"20160312_06_A5.raw", NativeID:"controllerType=0 controllerNumber=1 scan=25482"	LR+0.984PEVLQ+0.984DLR+0.984EN+0.984TEFTDHELQEWYK	LrPEVLqDLrEnTEFTDHELQEWYK	sp|P37235|HPCL1_HUMAN(pre=K,post=G);tr|E9PC71|E9PC71_HUMAN(pre=K,post=G)	5	639.307	2	0	0	0	0	0	0	0	0	0.127083	0	Ambiguous
353	20160312_06_A5.2602.2602.3 File:"20160312_06_A5.raw", NativeID:"controllerType=0 controllerNumber=1 scan=2602"	RM+15.995TVM+15.995R+0.984EK	RmTVmrEK	sp|Q13507-2|TRPC3_HUMAN(pre=R,post=G);sp|Q13507-3|TRPC3_HUMAN(pre=R,post=G);tr|D6R902|D6R902_HUMAN(pre=R,post=G);tr|J3QTB0|J3QTB0_HUMAN(pre=R,post=G);tr|D6RC49|D6RC49_HUMAN(pre=R,post=G)	3	361.848	1	0	0	0	0	0	0	0	0	0.127083	0	Valid
354	20160312_06_A5.2643.2643.2 File:"20160312_06_A5.raw", NativeID:"controllerType=0 controllerNumber=1 scan=2643"	RM+15.995TVM+15.995R+0.984EK	RmTVmrEK	sp|Q13507-2|TRPC3_HUMAN(pre=R,post=G);sp|Q13507-3|TRPC3_HUMAN(pre=R,post=G);tr|D6R902|D6R902_HUMAN(pre=R,post=G);tr|J3QTB0|J3QTB0_HUMAN(pre=R,post=G);tr|D6RC49|D6RC49_HUMAN(pre=R,post=G)	2	542.268	1	0	0	0	0	0	0	0	0	0.127083	0	Valid
355	20160312_06_A5.26888.26888.4 File:"20160312_06_A5.raw", NativeID:"controllerType=0 controllerNumber=1 scan=26888"	HRDTGILDSIGR+0.984FFGGDR+0.984GAPK	HRDTGILDSIGrFFGGDrGAPK	tr|H7BYR8|H7BYR8_HUMAN(pre=R,post=R);sp|P02686|MBP_HUMAN(pre=R,post=R);sp|P02686-2|MBP_HUMAN(pre=R,post=R);sp|P02686-3|MBP_HUMAN(pre=R,post=R);sp|P02686-4|MBP_HUMAN(pre=R,post=R);sp|P02686-5|MBP_HUMAN(pre=R,post=R);sp|P02686-6|MBP_HUMAN(pre=R,post=R);tr|E9PKX9|E9PKX9_HUMAN(pre=R,post=R);tr|J3QL64|J3QL64_HUMAN(pre=R,post=R);tr|E9PJ72|E9PJ72_HUMAN(pre=R,post=R);tr|J3KT34|J3KT34_HUMAN(pre=R,post=R);…	4	594.303	2	0	10	7	17	2	1	3	0	1	1	Valid
356	20160312_06_A5.26913.26913.2 File:"20160312_06_A5.raw", NativeID:"controllerType=0 controllerNumber=1 scan=26913"	HRDTGILDSIGR+0.984FFGGDR+0.984GAPK	HRDTGILDSIGrFFGGDrGAPK	tr|H7BYR8|H7BYR8_HUMAN(pre=R,post=R);sp|P02686|MBP_HUMAN(pre=R,post=R);sp|P02686-2|MBP_HUMAN(pre=R,post=R);sp|P02686-3|MBP_HUMAN(pre=R,post=R);sp|P02686-4|MBP_HUMAN(pre=R,post=R);sp|P02686-5|MBP_HUMAN(pre=R,post=R);sp|P02686-6|MBP_HUMAN(pre=R,post=R);tr|E9PKX9|E9PKX9_HUMAN(pre=R,post=R);tr|J3QL64|J3QL64_HUMAN(pre=R,post=R);tr|E9PJ72|E9PJ72_HUMAN(pre=R,post=R);tr|J3KT34|J3KT34_HUMAN(pre=R,post=R);…	2	1187.6	2	2	4	0	6	0	0	0	0	0.980705	1	Valid
357	20160312_06_A5.26980.26980.3 File:"20160312_06_A5.raw", NativeID:"controllerType=0 controllerNumber=1 scan=26980"	HRDTGILDSIGR+0.984FFGGDR+0.984GAPK	HRDTGILDSIGrFFGGDrGAPK	tr|H7BYR8|H7BYR8_HUMAN(pre=R,post=R);sp|P02686|MBP_HUMAN(pre=R,post=R);sp|P02686-2|MBP_HUMAN(pre=R,post=R);sp|P02686-3|MBP_HUMAN(pre=R,post=R);sp|P02686-4|MBP_HUMAN(pre=R,post=R);sp|P02686-5|MBP_HUMAN(pre=R,post=R);sp|P02686-6|MBP_HUMAN(pre=R,post=R);tr|E9PKX9|E9PKX9_HUMAN(pre=R,post=R);tr|J3QL64|J3QL64_HUMAN(pre=R,post=R);tr|E9PJ72|E9PJ72_HUMAN(pre=R,post=R);tr|J3KT34|J3KT34_HUMAN(pre=R,post=R);…	3	792.069	2	0	8	1	9	2	0	2	0	0.999714	1	Valid
358	20160312_06_A5.27210.27210.3 File:"20160312_06_A5.raw", NativeID:"controllerType=0 controllerNumber=1 scan=27210"	HRDTGILDSIGRFFGGDR+0.984GAPK	HRDTGILDSIGRFFGGDrGAPK	tr|H7BYR8|H7BYR8_HUMAN(pre=R,post=R);sp|P02686|MBP_HUMAN(pre=R,post=R);sp|P02686-2|MBP_HUMAN(pre=R,post=R);sp|P02686-3|MBP_HUMAN(pre=R,post=R);sp|P02686-4|MBP_HUMAN(pre=R,post=R);sp|P02686-5|MBP_HUMAN(pre=R,post=R);sp|P02686-6|MBP_HUMAN(pre=R,post=R);tr|E9PKX9|E9PKX9_HUMAN(pre=R,post=R);tr|J3QL64|J3QL64_HUMAN(pre=R,post=R);tr|E9PJ72|E9PJ72_HUMAN(pre=R,post=R);tr|J3KT34|J3KT34_HUMAN(pre=R,post=R);…	3	791.741	1	0	2	0	2	0	0	0	0	0.5062	1	Valid
359	20160312_06_A5.27403.27403.3 File:"20160312_06_A5.raw", NativeID:"controllerType=0 controllerNumber=1 scan=27403"	HRDTGILDSIGR+0.984FFGGDR	HRDTGILDSIGrFFGGDR	tr|H7BYR8|H7BYR8_HUMAN(pre=R,post=G);sp|P02686|MBP_HUMAN(pre=R,post=G);sp|P02686-2|MBP_HUMAN(pre=R,post=G);sp|P02686-3|MBP_HUMAN(pre=R,post=G);sp|P02686-4|MBP_HUMAN(pre=R,post=G);sp|P02686-5|MBP_HUMAN(pre=R,post=G);sp|P02686-6|MBP_HUMAN(pre=R,post=G);tr|E9PKX9|E9PKX9_HUMAN(pre=R,post=G);tr|J3QL64|J3QL64_HUMAN(pre=R,post=G);tr|E9PJ72|E9PJ72_HUMAN(pre=R,post=G);tr|J3KT34|J3KT34_HUMAN(pre=R,post=G);…	3	674.005	1	0	3	1	4	1	0	1	0	0.932673	1	Valid
360	20160312_06_A5.27491.27491.4 File:"20160312_06_A5.raw", NativeID:"controllerType=0 controllerNumber=1 scan=27491"	HRDTGILDSIGR+0.984FFGGDR	HRDTGILDSIGrFFGGDR	tr|H7BYR8|H7BYR8_HUMAN(pre=R,post=G);sp|P02686|MBP_HUMAN(pre=R,post=G);sp|P02686-2|MBP_HUMAN(pre=R,post=G);sp|P02686-3|MBP_HUMAN(pre=R,post=G);sp|P02686-4|MBP_HUMAN(pre=R,post=G);sp|P02686-5|MBP_HUMAN(pre=R,post=G);sp|P02686-6|MBP_HUMAN(pre=R,post=G);tr|E9PKX9|E9PKX9_HUMAN(pre=R,post=G);tr|J3QL64|J3QL64_HUMAN(pre=R,post=G);tr|E9PJ72|E9PJ72_HUMAN(pre=R,post=G);tr|J3KT34|J3KT34_HUMAN(pre=R,post=G);…	4	505.756	1	0	0	1	1	1	0	1	0	0.425753	0	Valid
361	20160312_06_A5.27503.27503.2 File:"20160312_06_A5.raw", NativeID:"controllerType=0 controllerNumber=1 scan=27503"	HRDTGILDSIGR+0.984FFGGDR	HRDTGILDSIGrFFGGDR	tr|H7BYR8|H7BYR8_HUMAN(pre=R,post=G);sp|P02686|MBP_HUMAN(pre=R,post=G);sp|P02686-2|MBP_HUMAN(pre=R,post=G);sp|P02686-3|MBP_HUMAN(pre=R,post=G);sp|P02686-4|MBP_HUMAN(pre=R,post=G);sp|P02686-5|MBP_HUMAN(pre=R,post=G);sp|P02686-6|MBP_HUMAN(pre=R,post=G);tr|E9PKX9|E9PKX9_HUMAN(pre=R,post=G);tr|J3QL64|J3QL64_HUMAN(pre=R,post=G);tr|E9PJ72|E9PJ72_HUMAN(pre=R,post=G);tr|J3KT34|J3KT34_HUMAN(pre=R,post=G);…	2	1010.5	1	2	4	0	6	0	0	0	0	0.980705	1	Valid
362	20160312_06_A5.27542.27542.3 File:"20160312_06_A5.raw", NativeID:"controllerType=0 controllerNumber=1 scan=27542"	HRDTGILDSIGR+0.984FFGGDR	HRDTGILDSIGrFFGGDR	tr|H7BYR8|H7BYR8_HUMAN(pre=R,post=G);sp|P02686|MBP_HUMAN(pre=R,post=G);sp|P02686-2|MBP_HUMAN(pre=R,post=G);sp|P02686-3|MBP_HUMAN(pre=R,post=G);sp|P02686-4|MBP_HUMAN(pre=R,post=G);sp|P02686-5|MBP_HUMAN(pre=R,post=G);sp|P02686-6|MBP_HUMAN(pre=R,post=G);tr|E9PKX9|E9PKX9_HUMAN(pre=R,post=G);tr|J3QL64|J3QL64_HUMAN(pre=R,post=G);tr|E9PJ72|E9PJ72_HUMAN(pre=R,post=G);tr|J3KT34|J3KT34_HUMAN(pre=R,post=G);…	3	674.005	1	0	4	1	5	2	0	2	0	0.986023	1	Valid
363	20160312_06_A5.27624.27624.4 File:"20160312_06_A5.raw", NativeID:"controllerType=0 controllerNumber=1 scan=27624"	HRDTGILDSIGR+0.984FFGGDR	HRDTGILDSIGrFFGGDR	tr|H7BYR8|H7BYR8_HUMAN(pre=R,post=G);sp|P02686|MBP_HUMAN(pre=R,post=G);sp|P02686-2|MBP_HUMAN(pre=R,post=G);sp|P02686-3|MBP_HUMAN(pre=R,post=G);sp|P02686-4|MBP_HUMAN(pre=R,post=G);sp|P02686-5|MBP_HUMAN(pre=R,post=G);sp|P02686-6|MBP_HUMAN(pre=R,post=G);tr|E9PKX9|E9PKX9_HUMAN(pre=R,post=G);tr|J3QL64|J3QL64_HUMAN(pre=R,post=G);tr|E9PJ72|E9PJ72_HUMAN(pre=R,post=G);tr|J3KT34|J3KT34_HUMAN(pre=R,post=G);…	4	505.756	1	0	0	1	1	1	0	1	0	0.425753	0	Valid
364	20160312_06_A5.27842.27842.3 File:"20160312_06_A5.raw", NativeID:"controllerType=0 controllerNumber=1 scan=27842"	HRDTGILDSIGR+0.984FFGGDR	HRDTGILDSIGrFFGGDR	tr|H7BYR8|H7BYR8_HUMAN(pre=R,post=G);sp|P02686|MBP_HUMAN(pre=R,post=G);sp|P02686-2|MBP_HUMAN(pre=R,post=G);sp|P02686-3|MBP_HUMAN(pre=R,post=G);sp|P02686-4|MBP_HUMAN(pre=R,post=G);sp|P02686-5|MBP_HUMAN(pre=R,post=G);sp|P02686-6|MBP_HUMAN(pre=R,post=G);tr|E9PKX9|E9PKX9_HUMAN(pre=R,post=G);tr|J3QL64|J3QL64_HUMAN(pre=R,post=G);tr|E9PJ72|E9PJ72_HUMAN(pre=R,post=G);tr|J3KT34|J3KT34_HUMAN(pre=R,post=G);…	3	674.005	1	0	3	1	4	2	0	2	0	0.96375	1	Valid
365	20160312_06_A5.27998.27998.2 File:"20160312_06_A5.raw", NativeID:"controllerType=0 controllerNumber=1 scan=27998"	LSLEFGDPASSLFR+0.984	LSLEFGDPASSLFr	sp|Q6L8Q7|PDE12_HUMAN(pre=K,post=W);sp|Q6L8Q7-2|PDE12_HUMAN(pre=K,post=W);tr|F6T1Q0|F6T1Q0_HUMAN(pre=K,post=W)	2	770.389	1	0	1	0	1	0	0	0	0	0.278664	0	Valid
366	20160312_06_A5.28045.28045.4 File:"20160312_06_A5.raw", NativeID:"controllerType=0 controllerNumber=1 scan=28045"	R+0.984NGAAGPHSPDPLLDEQAFGDLTDLPVVPK	rNGAAGPHSPDPLLDEQAFGDLTDLPVVPK	sp|Q9H3Q1|BORG4_HUMAN(pre=R,post=A);sp|Q9H3Q1-2|BORG4_HUMAN(pre=R,post=A)	4	782.648	1	0	0	0	0	0	0	0	0	0.127083	0	Ambiguous
367	20160312_06_A5.28455.28455.4 File:"20160312_06_A5.raw", NativeID:"controllerType=0 controllerNumber=1 scan=28455"	R+0.984NGAAGPHSPDPLLDEQAFGDLTDLPVVPK	rNGAAGPHSPDPLLDEQAFGDLTDLPVVPK	sp|Q9H3Q1|BORG4_HUMAN(pre=R,post=A);sp|Q9H3Q1-2|BORG4_HUMAN(pre=R,post=A)	4	782.648	1	0	0	0	0	0	0	0	0	0.127083	0	Ambiguous
368	20160312_06_A5.2852.2852.3 File:"20160312_06_A5.raw", NativeID:"controllerType=0 controllerNumber=1 scan=2852"	MTLN+0.984GGGSGAGGSRGGGQ+0.984ER+0.984ER+0.984	MTLnGGGSGAGGSRGGGqErEr	sp|P55042|RAD_HUMAN(pre=-,post=R)	3	698.976	2	0	1	0	1	0	0	0	0	0.278664	0	Valid
369	20160312_06_A5.28974.28974.2 File:"20160312_06_A5.raw", NativeID:"controllerType=0 controllerNumber=1 scan=28974"	LIGQ+0.984IVSSITASLR+0.984	LIGqIVSSITASLr	sp|Q6PEY2|TBA3E_HUMAN(pre=R,post=F);sp|P0DPH7|TBA3C_HUMAN(pre=R,post=F);sp|P0DPH7-2|TBA3C_HUMAN(pre=R,post=F);sp|P0DPH8|TBA3D_HUMAN(pre=R,post=F);sp|Q71U36|TBA1A_HUMAN(pre=R,post=F);sp|Q71U36-2|TBA1A_HUMAN(pre=R,post=F);tr|F8VQQ4|F8VQQ4_HUMAN(pre=R,post=F)	2	730.423	1	0	0	0	0	0	0	0	0	0.127083	0	Ambiguous
370	20160312_06_A5.29098.29098.3 File:"20160312_06_A5.raw", NativeID:"controllerType=0 controllerNumber=1 scan=29098"	WERTN+0.984LTYR+0.984IR	WERTnLTYrIR	sp|P22894|MMP8_HUMAN(pre=K,post=N);tr|H7C1M3|H7C1M3_HUMAN(pre=K,post=N)	3	503.932	1	0	0	0	0	0	0	0	0	0.127083	0	Valid
371	20160312_06_A5.29269.29269.2 File:"20160312_06_A5.raw", NativeID:"controllerType=0 controllerNumber=1 scan=29269"	VTAADAFLDLIR+0.984	VTAADAFLDLIr	sp|P43003|EAA1_HUMAN(pre=R,post=N);sp|P43003-2|EAA1_HUMAN(pre=R,post=N);tr|A0A087X0U3|A0A087X0U3_HUMAN(pre=R,post=Y);tr|A0A087WT87|A0A087WT87_HUMAN(pre=R,post=N)	2	653.357	1	0	1	0	1	0	0	0	0	0.278664	0	Valid
372	20160312_06_A5.29336.29336.2 File:"20160312_06_A5.raw", NativeID:"controllerType=0 controllerNumber=1 scan=29336"	YTPEEIAMATVTALR+0.984	YTPEEIAMATVTALr	sp|P09972|ALDOC_HUMAN(pre=K,post=R);tr|A8MVZ9|A8MVZ9_HUMAN(pre=K,post=R)	2	833.922	1	0	2	0	2	0	0	0	0	0.5062	1	Valid
373	20160312_06_A5.29455.29455.2 File:"20160312_06_A5.raw", NativeID:"controllerType=0 controllerNumber=1 scan=29455"	LISQ+0.984IVSSITASLR+0.984	LISqIVSSITASLr	sp|Q9NY65|TBA8_HUMAN(pre=R,post=F);sp|Q9NY65-2|TBA8_HUMAN(pre=R,post=F);sp|P68363|TBA1B_HUMAN(pre=R,post=F);sp|P68363-2|TBA1B_HUMAN(pre=R,post=F);sp|Q9BQE3|TBA1C_HUMAN(pre=R,post=F);sp|Q9H853|TBA4B_HUMAN(pre=R,post=F);sp|P68366|TBA4A_HUMAN(pre=R,post=F);sp|P68366-2|TBA4A_HUMAN(pre=R,post=F);tr|F8VVB9|F8VVB9_HUMAN(pre=R,post=F);tr|F5H5D3|F5H5D3_HUMAN(pre=R,post=F);tr|C9J2C0|C9J2C0_HUMAN(pre=R,post…	2	745.428	1	0	3	0	3	0	0	0	0	0.731196	1	Valid
374	20160312_06_A5.2951.2951.2 File:"20160312_06_A5.raw", NativeID:"controllerType=0 controllerNumber=1 scan=2951"	R+0.984LQ+0.984QQPQ+0.984R	rLqQQPqR	sp|Q8N7U7|TPRX1_HUMAN(pre=R,post=V);sp|Q8N7U7-2|TPRX1_HUMAN(pre=R,post=V);tr|B7ZMM8|B7ZMM8_HUMAN(pre=R,post=V);tr|D2CFI5|D2CFI5_HUMAN(pre=R,post=V)	2	528.776	1	2	2	0	4	0	0	0	0	0.878318	1	Valid
375	20160312_06_A5.29659.29659.2 File:"20160312_06_A5.raw", NativeID:"controllerType=0 controllerNumber=1 scan=29659"	LISQ+0.984IVSSITASLR+0.984	LISqIVSSITASLr	sp|Q9NY65|TBA8_HUMAN(pre=R,post=F);sp|Q9NY65-2|TBA8_HUMAN(pre=R,post=F);sp|P68363|TBA1B_HUMAN(pre=R,post=F);sp|P68363-2|TBA1B_HUMAN(pre=R,post=F);sp|Q9BQE3|TBA1C_HUMAN(pre=R,post=F);sp|Q9H853|TBA4B_HUMAN(pre=R,post=F);sp|P68366|TBA4A_HUMAN(pre=R,post=F);sp|P68366-2|TBA4A_HUMAN(pre=R,post=F);tr|F8VVB9|F8VVB9_HUMAN(pre=R,post=F);tr|F5H5D3|F5H5D3_HUMAN(pre=R,post=F);tr|C9J2C0|C9J2C0_HUMAN(pre=R,post…	2	745.428	1	0	0	0	0	0	0	0	0	0.127083	0	Ambiguous
376	20160312_06_A5.29862.29862.2 File:"20160312_06_A5.raw", NativeID:"controllerType=0 controllerNumber=1 scan=29862"	LISQ+0.984IVSSITASLR+0.984	LISqIVSSITASLr	sp|Q9NY65|TBA8_HUMAN(pre=R,post=F);sp|Q9NY65-2|TBA8_HUMAN(pre=R,post=F);sp|P68363|TBA1B_HUMAN(pre=R,post=F);sp|P68363-2|TBA1B_HUMAN(pre=R,post=F);sp|Q9BQE3|TBA1C_HUMAN(pre=R,post=F);sp|Q9H853|TBA4B_HUMAN(pre=R,post=F);sp|P68366|TBA4A_HUMAN(pre=R,post=F);sp|P68366-2|TBA4A_HUMAN(pre=R,post=F);tr|F8VVB9|F8VVB9_HUMAN(pre=R,post=F);tr|F5H5D3|F5H5D3_HUMAN(pre=R,post=F);tr|C9J2C0|C9J2C0_HUMAN(pre=R,post…	2	745.428	1	0	1	0	1	0	0	0	0	0.278664	0	Ambiguous
377	20160312_06_A5.30166.30166.2 File:"20160312_06_A5.raw", NativeID:"controllerType=0 controllerNumber=1 scan=30166"	YQEALDVIR+0.984GK	YQEALDVIrGK	sp|Q14CX7|NAA25_HUMAN(pre=K,post=L);sp|Q14CX7-2|NAA25_HUMAN(pre=K,post=L)	2	646.846	1	0	0	0	0	0	0	0	0	0.127083	0	Valid
378	20160312_06_A5.30209.30209.3 File:"20160312_06_A5.raw", NativeID:"controllerType=0 controllerNumber=1 scan=30209"	M+15.995PPPLPTR+0.984VDFSLAGALNAGFK	mPPPLPTrVDFSLAGALNAGFK	sp|P14136|GFAP_HUMAN(pre=R,post=E);sp|P14136-2|GFAP_HUMAN(pre=R,post=E);sp|P14136-3|GFAP_HUMAN(pre=R,post=E);tr|B4DIR1|B4DIR1_HUMAN(pre=R,post=E);tr|K7ELP4|K7ELP4_HUMAN(pre=R,post=E);tr|K7EMP8|K7EMP8_HUMAN(pre=R,post=E);tr|K7EKH9|K7EKH9_HUMAN(pre=R,post=E);tr|A0A1X7SCE1|A0A1X7SCE1_HUMAN(pre=R,post=E);tr|A0A1X7SBR3|A0A1X7SBR3_HUMAN(pre=R,post=E);tr|A0A1W2PR46|A0A1W2PR46_HUMAN(pre=R,post=E);tr|K7EJ…	3	772.741	1	0	0	1	1	0	1	1	0	0.425753	0	Valid
379	20160312_06_A5.30817.30817.3 File:"20160312_06_A5.raw", NativeID:"controllerType=0 controllerNumber=1 scan=30817"	MPPPLPTR+0.984VDFSLAGALNAGFK	MPPPLPTrVDFSLAGALNAGFK	sp|P14136|GFAP_HUMAN(pre=R,post=E);sp|P14136-2|GFAP_HUMAN(pre=R,post=E);sp|P14136-3|GFAP_HUMAN(pre=R,post=E);tr|B4DIR1|B4DIR1_HUMAN(pre=R,post=E);tr|K7ELP4|K7ELP4_HUMAN(pre=R,post=E);tr|K7EMP8|K7EMP8_HUMAN(pre=R,post=E);tr|K7EKH9|K7EKH9_HUMAN(pre=R,post=E);tr|A0A1X7SCE1|A0A1X7SCE1_HUMAN(pre=R,post=E);tr|A0A1X7SBR3|A0A1X7SBR3_HUMAN(pre=R,post=E);tr|A0A1W2PR46|A0A1W2PR46_HUMAN(pre=R,post=E);tr|K7EJ…	3	767.409	1	0	1	0	1	0	1	1	0	0.425753	0	Valid
380	20160312_06_A5.31404.31404.3 File:"20160312_06_A5.raw", NativeID:"controllerType=0 controllerNumber=1 scan=31404"	QPHR+0.984Q+0.984DKAATAIQSAWR+0.984GFK	QPHrqDKAATAIQSAWrGFK	sp|Q9H0B3|IQCN_HUMAN(pre=R,post=I);sp|Q9H0B3-2|IQCN_HUMAN(pre=R,post=I);sp|Q9H0B3-3|IQCN_HUMAN(pre=R,post=I);sp|Q9H0B3-4|IQCN_HUMAN(pre=R,post=I);sp|Q9H0B3-5|IQCN_HUMAN(pre=R,post=I);tr|A0A087WXN0|A0A087WXN0_HUMAN(pre=R,post=I)	3	767.058	2	0	3	1	4	0	0	0	0	0.878318	1	Valid
381	20160312_06_A5.3263.3263.3 File:"20160312_06_A5.raw", NativeID:"controllerType=0 controllerNumber=1 scan=3263"	QR+0.984SSQHGGSSTSLASTK	QrSSQHGGSSTSLASTK	sp|O15075|DCLK1_HUMAN(pre=K,post=V);sp|O15075-2|DCLK1_HUMAN(pre=K,post=V);sp|O15075-3|DCLK1_HUMAN(pre=K,post=V);sp|O15075-4|DCLK1_HUMAN(pre=K,post=V)	3	573.947	1	0	0	0	0	0	0	0	0	0.127083	0	Ambiguous
382	20160312_06_A5.33046.33046.3 File:"20160312_06_A5.raw", NativeID:"controllerType=0 controllerNumber=1 scan=33046"	LAVNMVPFPR+0.984LHFFM+15.995PGFAPLTAR	LAVNMVPFPrLHFFmPGFAPLTAR	sp|Q13509|TBB3_HUMAN(pre=K,post=G);sp|Q13509-2|TBB3_HUMAN(pre=K,post=G);tr|A0A0B4J269|A0A0B4J269_HUMAN(pre=K,post=G)	3	916.151	1	0	2	1	3	1	0	1	0	0.839242	1	Valid
383	20160312_06_A5.4416.4416.2 File:"20160312_06_A5.raw", NativeID:"controllerType=0 controllerNumber=1 scan=4416"	R+0.984QAELN+0.984PR	rQAELnPR	sp|Q16619|CTF1_HUMAN(pre=R,post=A);sp|Q16619-2|CTF1_HUMAN(pre=R,post=A)	2	493.257	1	0	1	0	1	0	0	0	0	0.278664	0	Valid
384	20160312_06_A5.4904.4904.2 File:"20160312_06_A5.raw", NativeID:"controllerType=0 controllerNumber=1 scan=4904"	R+0.984QQ+0.984LLER	rQqLLER	sp|Q9HA77|SYCM_HUMAN(pre=R,post=Q)	2	472.762	1	0	2	0	2	0	0	0	0	0.5062	1	Valid
385	20160312_06_A5.4930.4930.2 File:"20160312_06_A5.raw", NativeID:"controllerType=0 controllerNumber=1 scan=4930"	KSDISR+0.984NAYSR	KSDISrNAYSR	sp|Q8TAM6|ERMIN_HUMAN(pre=K,post=Y);sp|Q8TAM6-2|ERMIN_HUMAN(pre=K,post=Y);tr|B4DIZ1|B4DIZ1_HUMAN(pre=K,post=Y)	2	649.329	1	2	7	0	9	0	0	0	0	0.998948	1	Valid
386	20160312_06_A5.666.666.2 File:"20160312_06_A5.raw", NativeID:"controllerType=0 controllerNumber=1 scan=666"	R+0.984QM+15.995RRHASR	rQmRRHASR	sp|O75074|LRP3_HUMAN(pre=R,post=R)	2	607.818	1	0	0	0	0	0	0	0	0	0.127083	0	Ambiguous
387	20160312_06_A5.7395.7395.3 File:"20160312_06_A5.raw", NativeID:"controllerType=0 controllerNumber=1 scan=7395"	IDHYR+0.984HTAAQLGEK	IDHYrHTAAQLGEK	sp|P55011|S12A2_HUMAN(pre=R,post=L);sp|P55011-3|S12A2_HUMAN(pre=R,post=L);tr|G3XAL9|G3XAL9_HUMAN(pre=R,post=L)	3	547.278	1	0	2	3	5	2	1	3	0	0.992668	1	Valid
388	20160312_06_A5.7943.7943.3 File:"20160312_06_A5.raw", NativeID:"controllerType=0 controllerNumber=1 scan=7943"	EHAALEPR+0.984HLGGR	EHAALEPrHLGGR	sp|Q99798|ACON_HUMAN(pre=R,post=A);tr|A2A274|A2A274_HUMAN(pre=R,post=A)	3	481.92	1	0	4	3	7	2	0	2	0	0.997991	1	Valid
389	20160312_06_A5.8075.8075.4 File:"20160312_06_A5.raw", NativeID:"controllerType=0 controllerNumber=1 scan=8075"	QR+0.984NGVMPSHFSR	QrNGVMPSHFSR	sp|P39019|RS19_HUMAN(pre=R,post=G);tr|A0A075B6E2|A0A075B6E2_HUMAN(pre=R,post=G)	4	354.926	1	0	1	0	1	1	0	1	0	0.425753	0	Valid
390	20160312_06_A5.8234.8234.2 File:"20160312_06_A5.raw", NativeID:"controllerType=0 controllerNumber=1 scan=8234"	NLIHGSDSVESAR+0.984R+0.984	NLIHGSDSVESArr	sp|Q13232|NDK3_HUMAN(pre=K,post=E);tr|H3BPR2|H3BPR2_HUMAN(pre=K,post=E)	2	771.88	2	0	0	0	0	0	0	0	0	0.127083	0	Valid
391	20160312_06_A5.8804.8804.4 File:"20160312_06_A5.raw", NativeID:"controllerType=0 controllerNumber=1 scan=8804"	SLGHPEPLSN+0.984GR+0.984PQGNSR	SLGHPEPLSnGrPQGNSR	sp|P49768|PSN1_HUMAN(pre=R,post=Q);sp|P49768-2|PSN1_HUMAN(pre=R,post=Q);sp|P49768-3|PSN1_HUMAN(pre=R,post=Q);sp|P49768-4|PSN1_HUMAN(pre=R,post=Q);sp|P49768-5|PSN1_HUMAN(pre=R,post=Q);sp|P49768-6|PSN1_HUMAN(pre=R,post=Q);sp|P49768-7|PSN1_HUMAN(pre=R,post=Q);tr|G3V3P0|G3V3P0_HUMAN(pre=R,post=Q);tr|G3V2B1|G3V2B1_HUMAN(pre=R,post=Q);tr|G3V5B1|G3V5B1_HUMAN(pre=R,post=Q);tr|G3V3Z0|G3V3Z0_HUMAN(pre=R,po…	4	476.986	1	0	1	0	1	0	0	0	0	0.278664	0	Valid
392	20160312_06_A5.8888.8888.3 File:"20160312_06_A5.raw", NativeID:"controllerType=0 controllerNumber=1 scan=8888"	QHAFSMAR+0.984NGDYR	QHAFSMArNGDYR	sp|P17600|SYN1_HUMAN(pre=R,post=S);sp|P17600-2|SYN1_HUMAN(pre=R,post=S);tr|A0A1W2PS00|A0A1W2PS00_HUMAN(pre=R,post=S)	3	518.569	1	0	1	0	1	0	1	1	0	0.425753	0	Valid
393	20160312_06_A5.9006.9006.3 File:"20160312_06_A5.raw", NativeID:"controllerType=0 controllerNumber=1 scan=9006"	KGPGPGGPGGAGVAR+0.984GGAGGGPSGD	KGPGPGGPGGAGVArGGAGGGPSGD	sp|Q92686|NEUG_HUMAN(pre=R,post=-)	3	649.981	1	0	3	0	3	1	1	2	0	0.909249	1	Valid
394	20160312_06_A5.9020.9020.2 File:"20160312_06_A5.raw", NativeID:"controllerType=0 controllerNumber=1 scan=9020"	KGPGPGGPGGAGVAR+0.984GGAGGGPSGD	KGPGPGGPGGAGVArGGAGGGPSGD	sp|Q92686|NEUG_HUMAN(pre=R,post=-)	2	974.468	1	2	1	1	4	0	0	0	0	0.878318	1	Valid
395	20160312_06_A5.9782.9782.2 File:"20160312_06_A5.raw", NativeID:"controllerType=0 controllerNumber=1 scan=9782"	GGSR+0.984GEEVGELSR+0.984GK	GGSrGEEVGELSrGK	sp|P09543|CN37_HUMAN(pre=K,post=L);sp|P09543-2|CN37_HUMAN(pre=K,post=L)	2	760.372	2	0	2	2	4	2	0	2	0	0.96375	1	Valid
396	20160312_06_A5.9885.9885.2 File:"20160312_06_A5.raw", NativeID:"controllerType=0 controllerNumber=1 scan=9885"	QEYDESGPSIVHR+0.984K	QEYDESGPSIVHrK	sp|Q6S8J3|POTEE_HUMAN(pre=K,post=C);sp|A5A3E0|POTEF_HUMAN(pre=K,post=C);sp|P0CG38|POTEI_HUMAN(pre=K,post=C);sp|P0CG39|POTEJ_HUMAN(pre=K,post=C);sp|Q9BYX7|ACTBM_HUMAN(pre=K,post=C);sp|P63261|ACTG_HUMAN(pre=K,post=C);sp|P60709|ACTB_HUMAN(pre=K,post=C);tr|A0A2R8YFE2|A0A2R8YFE2_HUMAN(pre=K,post=C)	2	823.395	1	0	4	2	6	1	0	1	0	0.989852	1	Valid
397	20160312_06_A5.9972.9972.3 File:"20160312_06_A5.raw", NativeID:"controllerType=0 controllerNumber=1 scan=9972"	NR+0.984SDIGAHQPGMSLSSSK	NrSDIGAHQPGMSLSSSK	sp|Q92599|SEPT8_HUMAN(pre=K,post=V)	3	624.968	1	0	0	0	0	0	0	0	0	0.127083	0	Ambiguous
398	20160312_07_A6.13101.13101.3 File:"20160312_07_A6.raw", NativeID:"controllerType=0 controllerNumber=1 scan=13101"	PSSR+0.984ASSR+0.984ASSRPRPDDLEI	PSSrASSrASSRPRPDDLEI	sp|P17302|CXA1_HUMAN(pre=R,post=-)	3	729.365	2	3	6	2	11	0	0	0	0	0.99985	1	Valid
399	20160312_07_A6.14214.14214.2 File:"20160312_07_A6.raw", NativeID:"controllerType=0 controllerNumber=1 scan=14214"	TGEPDEEEGTFR+0.984SSIR	TGEPDEEEGTFrSSIR	sp|O00168|PLM_HUMAN(pre=R,post=R);tr|K7EQG4|K7EQG4_HUMAN(pre=R,post=R)	2	905.909	1	0	14	1	15	0	0	0	0	0.999997	1	Valid
400	20160312_07_A6.14276.14276.3 File:"20160312_07_A6.raw", NativeID:"controllerType=0 controllerNumber=1 scan=14276"	TGEPDEEEGTFR+0.984SSIR	TGEPDEEEGTFrSSIR	sp|O00168|PLM_HUMAN(pre=R,post=R);tr|K7EQG4|K7EQG4_HUMAN(pre=R,post=R)	3	604.275	1	0	1	0	1	0	0	0	0	0.278664	0	Valid
401	20160312_07_A6.14407.14407.2 File:"20160312_07_A6.raw", NativeID:"controllerType=0 controllerNumber=1 scan=14407"	TGEPDEEEGTFR+0.984SSIR	TGEPDEEEGTFrSSIR	sp|O00168|PLM_HUMAN(pre=R,post=R);tr|K7EQG4|K7EQG4_HUMAN(pre=R,post=R)	2	905.909	1	0	7	0	7	0	0	0	0	0.99264	1	Valid
402	20160312_07_A6.14490.14490.3 File:"20160312_07_A6.raw", NativeID:"controllerType=0 controllerNumber=1 scan=14490"	AGDFHR+0.984NDSIYEELQK	AGDFHrNDSIYEELQK	sp|P49789|FHIT_HUMAN(pre=K,post=H)	3	641.635	1	0	0	0	0	0	0	0	0	0.127083	0	Ambiguous
403	20160312_07_A6.155.155.3 File:"20160312_07_A6.raw", NativeID:"controllerType=0 controllerNumber=1 scan=155"	EGKR+0.984GC+57.021PREGK	EGKrGcPREGK	tr|H7BZN7|H7BZN7_HUMAN(pre=R,post=R)	3	425.548	1	0	0	0	0	0	0	0	0	0.127083	0	Ambiguous
404	20160312_07_A6.16022.16022.4 File:"20160312_07_A6.raw", NativeID:"controllerType=0 controllerNumber=1 scan=16022"	SELDTIDSQHR+0.984VHEDIEMTK	SELDTIDSQHrVHEDIEMTK	sp|P43004|EAA2_HUMAN(pre=K,post=T);sp|P43004-2|EAA2_HUMAN(pre=K,post=T);sp|P43004-3|EAA2_HUMAN(pre=K,post=T);tr|H0YEB1|H0YEB1_HUMAN(pre=K,post=T);tr|A0A163QEF0|A0A163QEF0_HUMAN(pre=K,post=T);tr|A0A2R8Y6J5|A0A2R8Y6J5_HUMAN(pre=K,post=T);tr|A0A2R8YG01|A0A2R8YG01_HUMAN(pre=K,post=T);tr|A0A2R8Y4W1|A0A2R8Y4W1_HUMAN(pre=K,post=T);tr|A0A2R8YD46|A0A2R8YD46_HUMAN(pre=K,post=T);tr|A0A2R8Y862|A0A2R8Y862_HUM…	4	596.782	1	0	6	5	11	1	0	1	0	0.999922	1	Valid
405	20160312_07_A6.16171.16171.2 File:"20160312_07_A6.raw", NativeID:"controllerType=0 controllerNumber=1 scan=16171"	FR+0.984TITTAYYR	FrTITTAYYR	sp|Q92930|RAB8B_HUMAN(pre=R,post=G);sp|P61006|RAB8A_HUMAN(pre=R,post=G);sp|P61006-2|RAB8A_HUMAN(pre=R,post=G);tr|H0YMN7|H0YMN7_HUMAN(pre=R,post=G);tr|H0YNE9|H0YNE9_HUMAN(pre=R,post=G)	2	646.836	1	0	1	0	1	0	0	0	0	0.278664	0	Ambiguous
406	20160312_07_A6.18655.18655.4 File:"20160312_07_A6.raw", NativeID:"controllerType=0 controllerNumber=1 scan=18655"	GYGHSR+0.984PPDRDFPADFFER	GYGHSrPPDRDFPADFFER	sp|Q86WA6|BPHL_HUMAN(pre=R,post=D);sp|Q86WA6-2|BPHL_HUMAN(pre=R,post=D);tr|B4DML3|B4DML3_HUMAN(pre=R,post=D);tr|Q49AI2|Q49AI2_HUMAN(pre=R,post=D)	4	567.513	1	0	1	2	3	0	0	0	0	0.731196	1	Valid
407	20160312_07_A6.18683.18683.5 File:"20160312_07_A6.raw", NativeID:"controllerType=0 controllerNumber=1 scan=18683"	M+15.995SLVEEGAVKR+0.984IN+0.984M+15.995AHLC+57.021IAGSHAVNGVAR	mSLVEEGAVKrInmAHLcIAGSHAVNGVAR	sp|P11217|PYGM_HUMAN(pre=R,post=I);sp|P11217-2|PYGM_HUMAN(pre=R,post=I)	5	645.726	1	0	4	0	4	0	0	0	0	0.878318	1	Valid
408	20160312_07_A6.1925.1925.2 File:"20160312_07_A6.raw", NativeID:"controllerType=0 controllerNumber=1 scan=1925"	GR+0.984ASSHSSQTQGGGSVTK	GrASSHSSQTQGGGSVTK	sp|P02545|LMNA_HUMAN(pre=R,post=K);sp|P02545-2|LMNA_HUMAN(pre=R,post=K);sp|P02545-3|LMNA_HUMAN(pre=R,post=K);sp|P02545-4|LMNA_HUMAN(pre=R,post=K);sp|P02545-5|LMNA_HUMAN(pre=R,post=K);sp|P02545-6|LMNA_HUMAN(pre=R,post=K);tr|Q3BDU5|Q3BDU5_HUMAN(pre=R,post=K);tr|Q5TCI8|Q5TCI8_HUMAN(pre=R,post=K);tr|A0A0C4DGC5|A0A0C4DGC5_HUMAN(pre=R,post=K)	2	866.915	1	3	1	0	4	0	0	0	0	0.878318	1	Valid
409	20160312_07_A6.20387.20387.4 File:"20160312_07_A6.raw", NativeID:"controllerType=0 controllerNumber=1 scan=20387"	KYQEDSDPER+0.984SDYEEQQLQ+0.984KEEEAR+0.984KVK	KYQEDSDPErSDYEEQQLqKEEEArKVK	sp|Q6P6C2|ALKB5_HUMAN(pre=R,post=S);sp|Q6P6C2-1|ALKB5_HUMAN(pre=R,post=S);sp|Q6P6C2-3|ALKB5_HUMAN(pre=R,post=S)	4	872.656	2	0	4	0	4	0	0	0	0	0.878318	1	Valid
410	20160312_07_A6.22577.22577.3 File:"20160312_07_A6.raw", NativeID:"controllerType=0 controllerNumber=1 scan=22577"	KELR+0.984Q+0.984FVPGDEPR+0.984EKM+15.995DLVTYFGK	KELrqFVPGDEPrEKmDLVTYFGK	sp|P09543|CN37_HUMAN(pre=K,post=R);sp|P09543-2|CN37_HUMAN(pre=K,post=R)	3	967.817	2	0	1	3	4	0	0	0	0	0.878318	1	Valid
411	20160312_07_A6.24212.24212.3 File:"20160312_07_A6.raw", NativeID:"controllerType=0 controllerNumber=1 scan=24212"	RERNKIAAAKC+57.021R+0.984N+0.984K	RERNKIAAAKcrnK	tr|A0A0A0MRJ2|A0A0A0MRJ2_HUMAN(pre=R,post=K);tr|Q5VTZ4|Q5VTZ4_HUMAN(pre=R,post=K);sp|P18847|ATF3_HUMAN(pre=R,post=K);sp|P18847-2|ATF3_HUMAN(pre=R,post=K);sp|P18847-3|ATF3_HUMAN(pre=R,post=K);sp|P18847-4|ATF3_HUMAN(pre=R,post=K);sp|P18847-5|ATF3_HUMAN(pre=R,post=K)	3	572.982	1	0	0	0	0	0	0	0	0	0.127083	0	Ambiguous
412	20160312_07_A6.24518.24518.2 File:"20160312_07_A6.raw", NativeID:"controllerType=0 controllerNumber=1 scan=24518"	ER+0.984ERQ+0.984N+0.984R+0.984LAEEKAR	ErERqnrLAEEKAR	sp|P45378|TNNT3_HUMAN(pre=K,post=R);sp|P45378-2|TNNT3_HUMAN(pre=K,post=R);sp|P45378-3|TNNT3_HUMAN(pre=K,post=R);sp|P45378-4|TNNT3_HUMAN(pre=K,post=R);sp|P45378-5|TNNT3_HUMAN(pre=K,post=R);sp|P45378-6|TNNT3_HUMAN(pre=K,post=R);sp|P45378-7|TNNT3_HUMAN(pre=K,post=R);tr|F8WA37|F8WA37_HUMAN(pre=K,post=R);tr|A0A286YFB1|A0A286YFB1_HUMAN(pre=K,post=R);tr|C9JZN9|C9JZN9_HUMAN(pre=K,post=R);tr|H9KVA2|H9KVA2…	2	894.946	2	0	1	0	1	0	0	0	0	0.278664	0	Ambiguous
413	20160312_07_A6.25009.25009.3 File:"20160312_07_A6.raw", NativeID:"controllerType=0 controllerNumber=1 scan=25009"	VTNDAR+0.984ENEM+15.995DENLEQVSGIIGNLR	VTNDArENEmDENLEQVSGIIGNLR	sp|P60880|SNP25_HUMAN(pre=R,post=H);sp|P60880-2|SNP25_HUMAN(pre=R,post=H)	3	945.114	1	0	0	0	0	0	0	0	0	0.127083	0	Ambiguous
414	20160312_07_A6.25104.25104.4 File:"20160312_07_A6.raw", NativeID:"controllerType=0 controllerNumber=1 scan=25104"	TLVMLDEQGEQLDR+0.984VEEGMNHINQDMK	TLVMLDEQGEQLDrVEEGMNHINQDMK	sp|P60880-2|SNP25_HUMAN(pre=R,post=E)	4	794.12	1	0	0	0	0	0	0	0	0	0.127083	0	Ambiguous
415	20160312_07_A6.25229.25229.2 File:"20160312_07_A6.raw", NativeID:"controllerType=0 controllerNumber=1 scan=25229"	SLSR+0.984LFSNK	SLSrLFSNK	sp|Q86TI4|WDR86_HUMAN(pre=R,post=V);sp|Q86TI4-1|WDR86_HUMAN(pre=R,post=V);tr|A0A0C4DGX6|A0A0C4DGX6_HUMAN(pre=R,post=V)	2	526.791	1	0	1	0	1	0	0	0	0	0.278664	0	Valid
416	20160312_07_A6.25917.25917.3 File:"20160312_07_A6.raw", NativeID:"controllerType=0 controllerNumber=1 scan=25917"	HRDTGILDSIGR+0.984FFGGDRGAPK	HRDTGILDSIGrFFGGDRGAPK	tr|H7BYR8|H7BYR8_HUMAN(pre=R,post=R);sp|P02686|MBP_HUMAN(pre=R,post=R);sp|P02686-2|MBP_HUMAN(pre=R,post=R);sp|P02686-3|MBP_HUMAN(pre=R,post=R);sp|P02686-4|MBP_HUMAN(pre=R,post=R);sp|P02686-5|MBP_HUMAN(pre=R,post=R);sp|P02686-6|MBP_HUMAN(pre=R,post=R);tr|E9PKX9|E9PKX9_HUMAN(pre=R,post=R);tr|J3QL64|J3QL64_HUMAN(pre=R,post=R);tr|E9PJ72|E9PJ72_HUMAN(pre=R,post=R);tr|J3KT34|J3KT34_HUMAN(pre=R,post=R);…	3	791.741	1	0	3	0	3	0	0	0	0	0.731196	1	Valid
417	20160312_07_A6.25926.25926.4 File:"20160312_07_A6.raw", NativeID:"controllerType=0 controllerNumber=1 scan=25926"	HRDTGILDSIGR+0.984FFGGDRGAPK	HRDTGILDSIGrFFGGDRGAPK	tr|H7BYR8|H7BYR8_HUMAN(pre=R,post=R);sp|P02686|MBP_HUMAN(pre=R,post=R);sp|P02686-2|MBP_HUMAN(pre=R,post=R);sp|P02686-3|MBP_HUMAN(pre=R,post=R);sp|P02686-4|MBP_HUMAN(pre=R,post=R);sp|P02686-5|MBP_HUMAN(pre=R,post=R);sp|P02686-6|MBP_HUMAN(pre=R,post=R);tr|E9PKX9|E9PKX9_HUMAN(pre=R,post=R);tr|J3QL64|J3QL64_HUMAN(pre=R,post=R);tr|E9PJ72|E9PJ72_HUMAN(pre=R,post=R);tr|J3KT34|J3KT34_HUMAN(pre=R,post=R);…	4	594.057	1	0	4	0	4	1	0	1	0	0.932673	1	Valid
418	20160312_07_A6.2616.2616.2 File:"20160312_07_A6.raw", NativeID:"controllerType=0 controllerNumber=1 scan=2616"	RM+15.995TVM+15.995R+0.984EK	RmTVmrEK	sp|Q13507-2|TRPC3_HUMAN(pre=R,post=G);sp|Q13507-3|TRPC3_HUMAN(pre=R,post=G);tr|D6R902|D6R902_HUMAN(pre=R,post=G);tr|J3QTB0|J3QTB0_HUMAN(pre=R,post=G);tr|D6RC49|D6RC49_HUMAN(pre=R,post=G)	2	542.268	1	0	0	0	0	0	0	0	0	0.127083	0	Valid
419	20160312_07_A6.26205.26205.4 File:"20160312_07_A6.raw", NativeID:"controllerType=0 controllerNumber=1 scan=26205"	HRDTGILDSIGR+0.984FFGGDRGAPK	HRDTGILDSIGrFFGGDRGAPK	tr|H7BYR8|H7BYR8_HUMAN(pre=R,post=R);sp|P02686|MBP_HUMAN(pre=R,post=R);sp|P02686-2|MBP_HUMAN(pre=R,post=R);sp|P02686-3|MBP_HUMAN(pre=R,post=R);sp|P02686-4|MBP_HUMAN(pre=R,post=R);sp|P02686-5|MBP_HUMAN(pre=R,post=R);sp|P02686-6|MBP_HUMAN(pre=R,post=R);tr|E9PKX9|E9PKX9_HUMAN(pre=R,post=R);tr|J3QL64|J3QL64_HUMAN(pre=R,post=R);tr|E9PJ72|E9PJ72_HUMAN(pre=R,post=R);tr|J3KT34|J3KT34_HUMAN(pre=R,post=R);…	4	594.057	1	0	4	0	4	0	0	0	0	0.878318	1	Valid
420	20160312_07_A6.26319.26319.3 File:"20160312_07_A6.raw", NativeID:"controllerType=0 controllerNumber=1 scan=26319"	HRDTGILDSIGR+0.984FFGGDRGAPK	HRDTGILDSIGrFFGGDRGAPK	tr|H7BYR8|H7BYR8_HUMAN(pre=R,post=R);sp|P02686|MBP_HUMAN(pre=R,post=R);sp|P02686-2|MBP_HUMAN(pre=R,post=R);sp|P02686-3|MBP_HUMAN(pre=R,post=R);sp|P02686-4|MBP_HUMAN(pre=R,post=R);sp|P02686-5|MBP_HUMAN(pre=R,post=R);sp|P02686-6|MBP_HUMAN(pre=R,post=R);tr|E9PKX9|E9PKX9_HUMAN(pre=R,post=R);tr|J3QL64|J3QL64_HUMAN(pre=R,post=R);tr|E9PJ72|E9PJ72_HUMAN(pre=R,post=R);tr|J3KT34|J3KT34_HUMAN(pre=R,post=R);…	3	791.741	1	1	0	0	1	0	0	0	0	0.278664	0	Valid
421	20160312_07_A6.26514.26514.4 File:"20160312_07_A6.raw", NativeID:"controllerType=0 controllerNumber=1 scan=26514"	R+0.984VTNDARENEMDENLEQVSGIIGNLR	rVTNDARENEMDENLEQVSGIIGNLR	sp|P60880|SNP25_HUMAN(pre=R,post=H);sp|P60880-2|SNP25_HUMAN(pre=R,post=H)	4	744.114	1	0	3	0	3	0	0	0	0	0.731196	1	Valid
422	20160312_07_A6.27195.27195.3 File:"20160312_07_A6.raw", NativeID:"controllerType=0 controllerNumber=1 scan=27195"	SN+0.984HEEEVADLLAQ+0.984IQ+0.984ASHITVER+0.984	SnHEEEVADLLAqIqASHITVEr	sp|P07197|NFM_HUMAN(pre=R,post=K);tr|E7EMV2|E7EMV2_HUMAN(pre=R,post=K);tr|E7ESP9|E7ESP9_HUMAN(pre=R,post=K)	3	865.081	1	0	1	0	1	0	0	0	0	0.278664	0	Ambiguous
423	20160312_07_A6.2785.2785.2 File:"20160312_07_A6.raw", NativeID:"controllerType=0 controllerNumber=1 scan=2785"	RM+15.995TVM+15.995R+0.984EK	RmTVmrEK	sp|Q13507-2|TRPC3_HUMAN(pre=R,post=G);sp|Q13507-3|TRPC3_HUMAN(pre=R,post=G);tr|D6R902|D6R902_HUMAN(pre=R,post=G);tr|J3QTB0|J3QTB0_HUMAN(pre=R,post=G);tr|D6RC49|D6RC49_HUMAN(pre=R,post=G)	2	542.268	1	0	0	0	0	0	0	0	0	0.127083	0	Valid
424	20160312_07_A6.27909.27909.4 File:"20160312_07_A6.raw", NativeID:"controllerType=0 controllerNumber=1 scan=27909"	VTNDAR+0.984ENEMDENLEQVSGIIGNLR	VTNDArENEMDENLEQVSGIIGNLR	sp|P60880|SNP25_HUMAN(pre=R,post=H);sp|P60880-2|SNP25_HUMAN(pre=R,post=H)	4	705.089	1	0	1	0	1	0	0	0	0	0.278664	0	Ambiguous
425	20160312_07_A6.27916.27916.3 File:"20160312_07_A6.raw", NativeID:"controllerType=0 controllerNumber=1 scan=27916"	HRDTGILDSIGR+0.984FFGGDR	HRDTGILDSIGrFFGGDR	tr|H7BYR8|H7BYR8_HUMAN(pre=R,post=G);sp|P02686|MBP_HUMAN(pre=R,post=G);sp|P02686-2|MBP_HUMAN(pre=R,post=G);sp|P02686-3|MBP_HUMAN(pre=R,post=G);sp|P02686-4|MBP_HUMAN(pre=R,post=G);sp|P02686-5|MBP_HUMAN(pre=R,post=G);sp|P02686-6|MBP_HUMAN(pre=R,post=G);tr|E9PKX9|E9PKX9_HUMAN(pre=R,post=G);tr|J3QL64|J3QL64_HUMAN(pre=R,post=G);tr|E9PJ72|E9PJ72_HUMAN(pre=R,post=G);tr|J3KT34|J3KT34_HUMAN(pre=R,post=G);…	3	674.005	1	0	2	1	3	1	0	1	0	0.839242	1	Valid
426	20160312_07_A6.28077.28077.3 File:"20160312_07_A6.raw", NativeID:"controllerType=0 controllerNumber=1 scan=28077"	HRDTGILDSIGR+0.984FFGGDR	HRDTGILDSIGrFFGGDR	tr|H7BYR8|H7BYR8_HUMAN(pre=R,post=G);sp|P02686|MBP_HUMAN(pre=R,post=G);sp|P02686-2|MBP_HUMAN(pre=R,post=G);sp|P02686-3|MBP_HUMAN(pre=R,post=G);sp|P02686-4|MBP_HUMAN(pre=R,post=G);sp|P02686-5|MBP_HUMAN(pre=R,post=G);sp|P02686-6|MBP_HUMAN(pre=R,post=G);tr|E9PKX9|E9PKX9_HUMAN(pre=R,post=G);tr|J3QL64|J3QL64_HUMAN(pre=R,post=G);tr|E9PJ72|E9PJ72_HUMAN(pre=R,post=G);tr|J3KT34|J3KT34_HUMAN(pre=R,post=G);…	3	674.005	1	0	3	1	4	1	0	1	0	0.932673	1	Valid
427	20160312_07_A6.28302.28302.3 File:"20160312_07_A6.raw", NativeID:"controllerType=0 controllerNumber=1 scan=28302"	VTNDAR+0.984ENEMDENLEQVSGIIGNLR	VTNDArENEMDENLEQVSGIIGNLR	sp|P60880|SNP25_HUMAN(pre=R,post=H);sp|P60880-2|SNP25_HUMAN(pre=R,post=H)	3	939.783	1	0	0	0	0	0	0	0	0	0.127083	0	Ambiguous
428	20160312_07_A6.30784.30784.2 File:"20160312_07_A6.raw", NativeID:"controllerType=0 controllerNumber=1 scan=30784"	M+15.995PPPLPTR+0.984VDFSLAGALNAGFK	mPPPLPTrVDFSLAGALNAGFK	sp|P14136|GFAP_HUMAN(pre=R,post=E);sp|P14136-2|GFAP_HUMAN(pre=R,post=E);sp|P14136-3|GFAP_HUMAN(pre=R,post=E);tr|B4DIR1|B4DIR1_HUMAN(pre=R,post=E);tr|K7ELP4|K7ELP4_HUMAN(pre=R,post=E);tr|K7EMP8|K7EMP8_HUMAN(pre=R,post=E);tr|K7EKH9|K7EKH9_HUMAN(pre=R,post=E);tr|A0A1X7SCE1|A0A1X7SCE1_HUMAN(pre=R,post=E);tr|A0A1X7SBR3|A0A1X7SBR3_HUMAN(pre=R,post=E);tr|A0A1W2PR46|A0A1W2PR46_HUMAN(pre=R,post=E);tr|K7EJ…	2	1158.61	1	0	2	0	2	0	0	0	0	0.5062	1	Valid
429	20160312_07_A6.31480.31480.3 File:"20160312_07_A6.raw", NativeID:"controllerType=0 controllerNumber=1 scan=31480"	MPPPLPTR+0.984VDFSLAGALNAGFK	MPPPLPTrVDFSLAGALNAGFK	sp|P14136|GFAP_HUMAN(pre=R,post=E);sp|P14136-2|GFAP_HUMAN(pre=R,post=E);sp|P14136-3|GFAP_HUMAN(pre=R,post=E);tr|B4DIR1|B4DIR1_HUMAN(pre=R,post=E);tr|K7ELP4|K7ELP4_HUMAN(pre=R,post=E);tr|K7EMP8|K7EMP8_HUMAN(pre=R,post=E);tr|K7EKH9|K7EKH9_HUMAN(pre=R,post=E);tr|A0A1X7SCE1|A0A1X7SCE1_HUMAN(pre=R,post=E);tr|A0A1X7SBR3|A0A1X7SBR3_HUMAN(pre=R,post=E);tr|A0A1W2PR46|A0A1W2PR46_HUMAN(pre=R,post=E);tr|K7EJ…	3	767.409	1	0	1	3	4	0	1	1	0	0.932673	1	Valid
430	20160312_07_A6.31507.31507.2 File:"20160312_07_A6.raw", NativeID:"controllerType=0 controllerNumber=1 scan=31507"	MPPPLPTR+0.984VDFSLAGALNAGFK	MPPPLPTrVDFSLAGALNAGFK	sp|P14136|GFAP_HUMAN(pre=R,post=E);sp|P14136-2|GFAP_HUMAN(pre=R,post=E);sp|P14136-3|GFAP_HUMAN(pre=R,post=E);tr|B4DIR1|B4DIR1_HUMAN(pre=R,post=E);tr|K7ELP4|K7ELP4_HUMAN(pre=R,post=E);tr|K7EMP8|K7EMP8_HUMAN(pre=R,post=E);tr|K7EKH9|K7EKH9_HUMAN(pre=R,post=E);tr|A0A1X7SCE1|A0A1X7SCE1_HUMAN(pre=R,post=E);tr|A0A1X7SBR3|A0A1X7SBR3_HUMAN(pre=R,post=E);tr|A0A1W2PR46|A0A1W2PR46_HUMAN(pre=R,post=E);tr|K7EJ…	2	1150.61	1	0	3	0	3	0	0	0	0	0.731196	1	Valid
431	20160312_07_A6.31611.31611.3 File:"20160312_07_A6.raw", NativeID:"controllerType=0 controllerNumber=1 scan=31611"	MPPPLPTR+0.984VDFSLAGALNAGFK	MPPPLPTrVDFSLAGALNAGFK	sp|P14136|GFAP_HUMAN(pre=R,post=E);sp|P14136-2|GFAP_HUMAN(pre=R,post=E);sp|P14136-3|GFAP_HUMAN(pre=R,post=E);tr|B4DIR1|B4DIR1_HUMAN(pre=R,post=E);tr|K7ELP4|K7ELP4_HUMAN(pre=R,post=E);tr|K7EMP8|K7EMP8_HUMAN(pre=R,post=E);tr|K7EKH9|K7EKH9_HUMAN(pre=R,post=E);tr|A0A1X7SCE1|A0A1X7SCE1_HUMAN(pre=R,post=E);tr|A0A1X7SBR3|A0A1X7SBR3_HUMAN(pre=R,post=E);tr|A0A1W2PR46|A0A1W2PR46_HUMAN(pre=R,post=E);tr|K7EJ…	3	767.409	1	0	0	1	1	0	1	1	0	0.425753	0	Valid
432	20160312_07_A6.3873.3873.3 File:"20160312_07_A6.raw", NativeID:"controllerType=0 controllerNumber=1 scan=3873"	R+0.984AAQ+0.984APDGASEPR	rAAqAPDGASEPR	sp|P11274|BCR_HUMAN(pre=R,post=A);sp|P11274-2|BCR_HUMAN(pre=R,post=A)	3	443.213	1	0	1	0	1	0	0	0	0	0.278664	0	Ambiguous
433	20160312_07_A6.5524.5524.3 File:"20160312_07_A6.raw", NativeID:"controllerType=0 controllerNumber=1 scan=5524"	AQGSTSSTR+0.984LHEPEK	AQGSTSSTrLHEPEK	sp|P78324|SHPS1_HUMAN(pre=K,post=N);sp|P78324-2|SHPS1_HUMAN(pre=K,post=N);sp|P78324-4|SHPS1_HUMAN(pre=K,post=N)	3	543.601	1	0	11	3	14	1	1	2	0	0.999998	1	Valid
434	20160312_07_A6.6516.6516.4 File:"20160312_07_A6.raw", NativeID:"controllerType=0 controllerNumber=1 scan=6516"	DSHHPAR+0.984TAHYGSLPQK	DSHHPArTAHYGSLPQK	tr|H7BYR8|H7BYR8_HUMAN(pre=K,post=S);sp|P02686|MBP_HUMAN(pre=K,post=S);sp|P02686-3|MBP_HUMAN(pre=K,post=S);sp|P02686-4|MBP_HUMAN(pre=K,post=S);sp|P02686-5|MBP_HUMAN(pre=K,post=S);sp|P02686-6|MBP_HUMAN(pre=K,post=S);tr|C9J6H1|C9J6H1_HUMAN(pre=K,post=S);tr|E9PKX9|E9PKX9_HUMAN(pre=K,post=H);tr|J3QL64|J3QL64_HUMAN(pre=K,post=S);tr|E9PJ72|E9PJ72_HUMAN(pre=K,post=S);tr|J3QKL5|J3QKL5_HUMAN(pre=K,post=S)…	4	476.486	1	0	5	5	10	1	1	2	0	0.999892	1	Valid
435	20160312_07_A6.6519.6519.3 File:"20160312_07_A6.raw", NativeID:"controllerType=0 controllerNumber=1 scan=6519"	DSHHPAR+0.984TAHYGSLPQK	DSHHPArTAHYGSLPQK	tr|H7BYR8|H7BYR8_HUMAN(pre=K,post=S);sp|P02686|MBP_HUMAN(pre=K,post=S);sp|P02686-3|MBP_HUMAN(pre=K,post=S);sp|P02686-4|MBP_HUMAN(pre=K,post=S);sp|P02686-5|MBP_HUMAN(pre=K,post=S);sp|P02686-6|MBP_HUMAN(pre=K,post=S);tr|C9J6H1|C9J6H1_HUMAN(pre=K,post=S);tr|E9PKX9|E9PKX9_HUMAN(pre=K,post=H);tr|J3QL64|J3QL64_HUMAN(pre=K,post=S);tr|E9PJ72|E9PJ72_HUMAN(pre=K,post=S);tr|J3QKL5|J3QKL5_HUMAN(pre=K,post=S)…	3	634.979	1	2	15	6	23	1	1	2	0	1	1	Valid
436	20160312_07_A6.6905.6905.4 File:"20160312_07_A6.raw", NativeID:"controllerType=0 controllerNumber=1 scan=6905"	RPPQPIQQPQR+0.984QRPR	RPPQPIQQPQrQRPR	sp|O14672|ADA10_HUMAN(pre=R,post=E);sp|O14672-2|ADA10_HUMAN(pre=R,post=E)	4	471.518	1	0	9	0	9	0	0	0	0	0.998948	1	Valid
437	20160312_07_A6.724.724.3 File:"20160312_07_A6.raw", NativeID:"controllerType=0 controllerNumber=1 scan=724"	RHR+0.984RIHPGK	RHrRIHPGK	sp|Q6ZNG1|ZN600_HUMAN(pre=K,post=K);tr|A0A3B3IT03|A0A3B3IT03_HUMAN(pre=K,post=K)	3	386.564	1	0	1	0	1	0	0	0	0	0.278664	0	Ambiguous
438	20160312_07_A6.7577.7577.4 File:"20160312_07_A6.raw", NativeID:"controllerType=0 controllerNumber=1 scan=7577"	R+0.984MQALEPYPANESSK	rMQALEPYPANESSK	sp|O43148|MCES_HUMAN(pre=K,post=L);sp|O43148-2|MCES_HUMAN(pre=K,post=L);tr|K7EP06|K7EP06_HUMAN(pre=K,post=L)	4	431.21	1	0	1	0	1	0	0	0	0	0.278664	0	Valid
439	20160312_07_A6.9245.9245.3 File:"20160312_07_A6.raw", NativeID:"controllerType=0 controllerNumber=1 scan=9245"	DPTR+0.984IYR+0.984MPEDQ+0.984VAR+0.984R+0.984GTTVQ+0.984LEC+57.021R	DPTrIYrMPEDqVArrGTTVqLEcR	sp|O94856|NFASC_HUMAN(pre=K,post=V);sp|O94856-2|NFASC_HUMAN(pre=K,post=V);sp|O94856-3|NFASC_HUMAN(pre=K,post=V);sp|O94856-4|NFASC_HUMAN(pre=K,post=V);sp|O94856-5|NFASC_HUMAN(pre=K,post=V);sp|O94856-6|NFASC_HUMAN(pre=K,post=V);sp|O94856-7|NFASC_HUMAN(pre=K,post=V);sp|O94856-8|NFASC_HUMAN(pre=K,post=V);sp|O94856-9|NFASC_HUMAN(pre=K,post=V);sp|O94856-10|NFASC_HUMAN(pre=K,post=V);sp|O94856-11|NFASC_H…	3	1018.48	4	0	0	1	1	1	0	1	0	0.425753	0	Valid
440	20160312_07_A6.9604.9604.3 File:"20160312_07_A6.raw", NativeID:"controllerType=0 controllerNumber=1 scan=9604"	LKPEADTLPR+0.984SGEQER	LKPEADTLPrSGEQER	sp|Q14CZ8|HECAM_HUMAN(pre=R,post=K)	3	609.647	1	0	3	1	4	2	0	2	0	0.96375	1	Valid
441	20160312_08_A7.10782.10782.2 File:"20160312_08_A7.raw", NativeID:"controllerType=0 controllerNumber=1 scan=10782"	NTDAVR+0.984AAKDEVSESR	NTDAVrAAKDEVSESR	sp|P07196|NFL_HUMAN(pre=K,post=R);tr|A0A0S2Z436|A0A0S2Z436_HUMAN(pre=K,post=R);tr|A0A087X0W2|A0A087X0W2_HUMAN(pre=K,post=R)	2	874.925	1	2	1	0	3	0	0	0	0	0.731196	1	Valid
442	20160312_08_A7.11241.11241.4 File:"20160312_08_A7.raw", NativeID:"controllerType=0 controllerNumber=1 scan=11241"	IR+0.984EILSDDKHDWDQR	IrEILSDDKHDWDQR	tr|B3KR06|B3KR06_HUMAN(pre=K,post=A);tr|E7ENG2|E7ENG2_HUMAN(pre=K,post=A);tr|C9J668|C9J668_HUMAN(pre=K,post=A);tr|E3W994|E3W994_HUMAN(pre=K,post=A);tr|J3KR49|J3KR49_HUMAN(pre=K,post=A);tr|E7ERI8|E7ERI8_HUMAN(pre=K,post=A);tr|D6RBU8|D6RBU8_HUMAN(pre=K,post=A);tr|E7EW49|E7EW49_HUMAN(pre=K,post=A);tr|A0A0U1RQI6|A0A0U1RQI6_HUMAN(pre=K,post=A);sp|O75122|CLAP2_HUMAN(pre=K,post=A);sp|O75122-2|CLAP2_HUMA…	4	482.489	1	0	1	0	1	1	2	3	0	0.731962	1	Valid
443	20160312_08_A7.11727.11727.2 File:"20160312_08_A7.raw", NativeID:"controllerType=0 controllerNumber=1 scan=11727"	MLEM+15.995R+0.984RRKSEEIQ+0.984KR	MLEmrRRKSEEIqKR	sp|Q7L590|MCM10_HUMAN(pre=R,post=F);sp|Q7L590-2|MCM10_HUMAN(pre=R,post=F);tr|Q5T670|Q5T670_HUMAN(pre=R,post=F)	2	1004.53	1	0	3	1	4	0	0	0	0	0.878318	1	Valid
444	20160312_08_A7.13085.13085.5 File:"20160312_08_A7.raw", NativeID:"controllerType=0 controllerNumber=1 scan=13085"	RRFEVFGEIEEC+57.021EVLTR+0.984NRR	RRFEVFGEIEEcEVLTrNRR	sp|Q86YN6|PRGC2_HUMAN(pre=K,post=G);sp|Q86YN6-2|PRGC2_HUMAN(pre=K,post=G);sp|Q86YN6-3|PRGC2_HUMAN(pre=K,post=G);sp|Q86YN6-4|PRGC2_HUMAN(pre=K,post=G);sp|Q86YN6-5|PRGC2_HUMAN(pre=K,post=G);sp|Q86YN6-6|PRGC2_HUMAN(pre=K,post=G);tr|H0Y713|H0Y713_HUMAN(pre=K,post=G)	5	520.067	1	0	1	0	1	0	0	0	0	0.278664	0	Valid
445	20160312_08_A7.14145.14145.2 File:"20160312_08_A7.raw", NativeID:"controllerType=0 controllerNumber=1 scan=14145"	FR+0.984TITSSYYR	FrTITSSYYR	sp|Q9H0U4|RAB1B_HUMAN(pre=R,post=G);sp|P62820|RAB1A_HUMAN(pre=R,post=G);tr|E7END7|E7END7_HUMAN(pre=R,post=G)	2	647.825	1	0	1	0	1	0	0	0	0	0.278664	0	Ambiguous
446	20160312_08_A7.14374.14374.3 File:"20160312_08_A7.raw", NativeID:"controllerType=0 controllerNumber=1 scan=14374"	NR+0.984DVEMGNSVIEENEMK	NrDVEMGNSVIEENEMK	sp|P43003|EAA1_HUMAN(pre=K,post=K);sp|P43003-2|EAA1_HUMAN(pre=K,post=K);tr|A0A087X0U3|A0A087X0U3_HUMAN(pre=K,post=K);tr|A0A087WT87|A0A087WT87_HUMAN(pre=K,post=K)	3	665.632	1	0	0	0	0	0	0	0	0	0.127083	0	Valid
447	20160312_08_A7.14424.14424.2 File:"20160312_08_A7.raw", NativeID:"controllerType=0 controllerNumber=1 scan=14424"	FR+0.984TITSTYYR	FrTITSTYYR	sp|Q15286|RAB35_HUMAN(pre=R,post=G);sp|Q15286-2|RAB35_HUMAN(pre=R,post=G)	2	654.833	1	0	1	0	1	0	0	0	0	0.278664	0	Valid
448	20160312_08_A7.14884.14884.2 File:"20160312_08_A7.raw", NativeID:"controllerType=0 controllerNumber=1 scan=14884"	LGPGTR+0.984LSLAR	LGPGTrLSLAR	sp|P14136|GFAP_HUMAN(pre=R,post=M);sp|P14136-2|GFAP_HUMAN(pre=R,post=M);sp|P14136-3|GFAP_HUMAN(pre=R,post=M);tr|B4DIR1|B4DIR1_HUMAN(pre=R,post=M);tr|K7ELP4|K7ELP4_HUMAN(pre=R,post=M);tr|K7EMP8|K7EMP8_HUMAN(pre=R,post=M);tr|K7EKH9|K7EKH9_HUMAN(pre=R,post=M);tr|A0A1X7SCE1|A0A1X7SCE1_HUMAN(pre=R,post=M);tr|A0A1X7SBR3|A0A1X7SBR3_HUMAN(pre=R,post=M);tr|A0A1W2PR46|A0A1W2PR46_HUMAN(pre=R,post=M);tr|K7EJ…	2	571.339	1	2	16	10	28	2	2	4	0	1	1	Valid
449	20160312_08_A7.15056.15056.2 File:"20160312_08_A7.raw", NativeID:"controllerType=0 controllerNumber=1 scan=15056"	LGPGTR+0.984LSLAR	LGPGTrLSLAR	sp|P14136|GFAP_HUMAN(pre=R,post=M);sp|P14136-2|GFAP_HUMAN(pre=R,post=M);sp|P14136-3|GFAP_HUMAN(pre=R,post=M);tr|B4DIR1|B4DIR1_HUMAN(pre=R,post=M);tr|K7ELP4|K7ELP4_HUMAN(pre=R,post=M);tr|K7EMP8|K7EMP8_HUMAN(pre=R,post=M);tr|K7EKH9|K7EKH9_HUMAN(pre=R,post=M);tr|A0A1X7SCE1|A0A1X7SCE1_HUMAN(pre=R,post=M);tr|A0A1X7SBR3|A0A1X7SBR3_HUMAN(pre=R,post=M);tr|A0A1W2PR46|A0A1W2PR46_HUMAN(pre=R,post=M);tr|K7EJ…	2	571.339	1	2	21	11	34	2	2	4	0	1	1	Valid
450	20160312_08_A7.15099.15099.3 File:"20160312_08_A7.raw", NativeID:"controllerType=0 controllerNumber=1 scan=15099"	SSDSKPPSC+57.021SER+0.984PLTLFHTVQSTEK	SSDSKPPScSErPLTLFHTVQSTEK	sp|Q9UNA1|RHG26_HUMAN(pre=K,post=Q);sp|Q9UNA1-2|RHG26_HUMAN(pre=K,post=Q);tr|H0Y4P9|H0Y4P9_HUMAN(pre=K,post=Q);tr|H7C3P8|H7C3P8_HUMAN(pre=K,post=Q);tr|A0A2R8YGB3|A0A2R8YGB3_HUMAN(pre=K,post=Q);tr|H7C1J1|H7C1J1_HUMAN(pre=K,post=Q);tr|H0Y835|H0Y835_HUMAN(pre=K,post=Q)	3	940.456	1	0	1	0	1	0	0	0	0	0.278664	0	Ambiguous
451	20160312_08_A7.15742.15742.2 File:"20160312_08_A7.raw", NativeID:"controllerType=0 controllerNumber=1 scan=15742"	GQILVN+0.984GR+0.984PR+0.984ELR+0.984	GQILVnGrPrELr	sp|Q9H172|ABCG4_HUMAN(pre=K,post=T);sp|Q9H172-2|ABCG4_HUMAN(pre=K,post=T);sp|Q9H172-3|ABCG4_HUMAN(pre=K,post=T);sp|Q9H172-4|ABCG4_HUMAN(pre=K,post=T);tr|E9PJ00|E9PJ00_HUMAN(pre=K,post=T)	2	756.413	3	0	0	0	0	0	0	0	0	0.127083	0	Ambiguous
452	20160312_08_A7.16101.16101.2 File:"20160312_08_A7.raw", NativeID:"controllerType=0 controllerNumber=1 scan=16101"	LASAR+0.984VHHR	LASArVHHR	sp|Q6PEZ8|PONL1_HUMAN(pre=R,post=A);sp|Q6PEZ8-2|PONL1_HUMAN(pre=R,post=A);sp|Q6PEZ8-3|PONL1_HUMAN(pre=R,post=A);tr|B7Z3M0|B7Z3M0_HUMAN(pre=R,post=A);tr|A0A2U3TZJ2|A0A2U3TZJ2_HUMAN(pre=R,post=A);tr|K7EPI2|K7EPI2_HUMAN(pre=R,post=A)	2	524.295	1	0	0	0	0	0	0	0	0	0.127083	0	Valid
453	20160312_08_A7.1712.1712.3 File:"20160312_08_A7.raw", NativeID:"controllerType=0 controllerNumber=1 scan=1712"	KAGAVTSTPNR+0.984NSSK	KAGAVTSTPNrNSSK	sp|Q9ULR3|PPM1H_HUMAN(pre=K,post=R)	3	506.934	1	0	0	0	0	0	0	0	0	0.127083	0	Ambiguous
454	20160312_08_A7.17546.17546.5 File:"20160312_08_A7.raw", NativeID:"controllerType=0 controllerNumber=1 scan=17546"	M+15.995SLVEEGAVKR+0.984IN+0.984M+15.995AHLC+57.021IAGSHAVN+0.984GVAR	mSLVEEGAVKrInmAHLcIAGSHAVnGVAR	sp|P11217|PYGM_HUMAN(pre=R,post=I);sp|P11217-2|PYGM_HUMAN(pre=R,post=I)	5	645.923	1	0	0	0	0	0	0	0	0	0.127083	0	Valid
455	20160312_08_A7.1761.1761.3 File:"20160312_08_A7.raw", NativeID:"controllerType=0 controllerNumber=1 scan=1761"	KTEVQAHSPSR+0.984K	KTEVQAHSPSrK	sp|P11137|MTAP2_HUMAN(pre=K,post=F);sp|P11137-3|MTAP2_HUMAN(pre=K,post=F)	3	456.913	1	1	3	2	6	1	0	1	0	0.989852	1	Valid
456	20160312_08_A7.1877.1877.2 File:"20160312_08_A7.raw", NativeID:"controllerType=0 controllerNumber=1 scan=1877"	GSR+0.984GQHQAHSLER	GSrGQHQAHSLER	sp|P60201|MYPR_HUMAN(pre=R,post=V)	2	732.359	1	2	1	0	3	0	0	0	0	0.731196	1	Valid
457	20160312_08_A7.1885.1885.4 File:"20160312_08_A7.raw", NativeID:"controllerType=0 controllerNumber=1 scan=1885"	GSR+0.984GQHQAHSLER	GSrGQHQAHSLER	sp|P60201|MYPR_HUMAN(pre=R,post=V)	4	366.683	1	0	1	0	1	0	0	0	0	0.278664	0	Valid
458	20160312_08_A7.20110.20110.2 File:"20160312_08_A7.raw", NativeID:"controllerType=0 controllerNumber=1 scan=20110"	GAILTTMLATR+0.984	GAILTTMLATr	sp|Q9UQM7|KCC2A_HUMAN(pre=K,post=N);sp|Q9UQM7-2|KCC2A_HUMAN(pre=K,post=N);sp|Q13554|KCC2B_HUMAN(pre=K,post=N);sp|Q13554-2|KCC2B_HUMAN(pre=K,post=N);sp|Q13554-3|KCC2B_HUMAN(pre=K,post=N);sp|Q13554-4|KCC2B_HUMAN(pre=K,post=N);sp|Q13554-5|KCC2B_HUMAN(pre=K,post=N);sp|Q13554-6|KCC2B_HUMAN(pre=K,post=N);sp|Q13554-7|KCC2B_HUMAN(pre=K,post=N);sp|Q13554-8|KCC2B_HUMAN(pre=K,post=N);sp|Q13557|KCC2D_HUMAN(p…	2	574.821	1	0	3	0	3	0	0	0	0	0.731196	1	Valid
459	20160312_08_A7.20123.20123.2 File:"20160312_08_A7.raw", NativeID:"controllerType=0 controllerNumber=1 scan=20123"	GAILTTMLATR+0.984	GAILTTMLATr	sp|Q9UQM7|KCC2A_HUMAN(pre=K,post=N);sp|Q9UQM7-2|KCC2A_HUMAN(pre=K,post=N);sp|Q13554|KCC2B_HUMAN(pre=K,post=N);sp|Q13554-2|KCC2B_HUMAN(pre=K,post=N);sp|Q13554-3|KCC2B_HUMAN(pre=K,post=N);sp|Q13554-4|KCC2B_HUMAN(pre=K,post=N);sp|Q13554-5|KCC2B_HUMAN(pre=K,post=N);sp|Q13554-6|KCC2B_HUMAN(pre=K,post=N);sp|Q13554-7|KCC2B_HUMAN(pre=K,post=N);sp|Q13554-8|KCC2B_HUMAN(pre=K,post=N);sp|Q13557|KCC2D_HUMAN(p…	2	574.821	1	0	2	0	2	0	0	0	0	0.5062	1	Valid
460	20160312_08_A7.20993.20993.3 File:"20160312_08_A7.raw", NativeID:"controllerType=0 controllerNumber=1 scan=20993"	RDR+0.984HPEEGVVAELQGFAVDK	RDrHPEEGVVAELQGFAVDK	sp|Q96DZ9|CKLF5_HUMAN(pre=R,post=A);sp|Q96DZ9-2|CKLF5_HUMAN(pre=R,post=A);sp|Q96DZ9-3|CKLF5_HUMAN(pre=R,post=A);sp|Q96DZ9-4|CKLF5_HUMAN(pre=R,post=A);sp|Q96DZ9-5|CKLF5_HUMAN(pre=R,post=A);sp|Q96DZ9-6|CKLF5_HUMAN(pre=R,post=A);tr|C9JAI6|C9JAI6_HUMAN(pre=R,post=A)	3	751.714	1	0	4	0	4	0	0	0	0	0.878318	1	Valid
461	20160312_08_A7.21045.21045.4 File:"20160312_08_A7.raw", NativeID:"controllerType=0 controllerNumber=1 scan=21045"	KNPPSAR+0.984NGGHETDAQILELNQQLVDLK	KNPPSArNGGHETDAQILELNQQLVDLK	sp|Q9UPY8|MARE3_HUMAN(pre=R,post=L);sp|Q9UPY8-2|MARE3_HUMAN(pre=R,post=L);tr|C9JB30|C9JB30_HUMAN(pre=R,post=L)	4	772.403	1	0	0	1	1	0	0	0	0	0.278664	0	Valid
462	20160312_08_A7.21410.21410.2 File:"20160312_08_A7.raw", NativeID:"controllerType=0 controllerNumber=1 scan=21410"	HSDIVVLYAR+0.984TLR	HSDIVVLYArTLR	sp|Q6PCD5|RFWD3_HUMAN(pre=R,post=A)	2	772.434	1	0	0	0	0	0	0	0	0	0.127083	0	Ambiguous
463	20160312_08_A7.21877.21877.4 File:"20160312_08_A7.raw", NativeID:"controllerType=0 controllerNumber=1 scan=21877"	EGSRTDDEVVQR+0.984EEEAIQLDGLNASQIR	EGSRTDDEVVQrEEEAIQLDGLNASQIR	sp|P14625|ENPL_HUMAN(pre=R,post=E);tr|Q96GW1|Q96GW1_HUMAN(pre=R,post=E);tr|A0A1W2PRR1|A0A1W2PRR1_HUMAN(pre=R,post=E)	4	790.386	1	0	6	0	6	0	0	0	0	0.980705	1	Valid
464	20160312_08_A7.2228.2228.3 File:"20160312_08_A7.raw", NativeID:"controllerType=0 controllerNumber=1 scan=2228"	NR+0.984NEQESAVHPR	NrNEQESAVHPR	sp|Q9UJU6|DBNL_HUMAN(pre=R,post=E);sp|Q9UJU6-2|DBNL_HUMAN(pre=R,post=E);sp|Q9UJU6-4|DBNL_HUMAN(pre=R,post=E);sp|Q9UJU6-5|DBNL_HUMAN(pre=R,post=E);sp|Q9UJU6-6|DBNL_HUMAN(pre=R,post=E);tr|H0Y5J4|H0Y5J4_HUMAN(pre=R,post=E);tr|B4DDD6|B4DDD6_HUMAN(pre=R,post=E)	3	479.9	1	0	1	0	1	0	0	0	0	0.278664	0	Valid
465	20160312_08_A7.22338.22338.3 File:"20160312_08_A7.raw", NativeID:"controllerType=0 controllerNumber=1 scan=22338"	R+0.984VTNDARENEM+15.995DENLEQVSGIIGNLR	rVTNDARENEmDENLEQVSGIIGNLR	sp|P60880|SNP25_HUMAN(pre=R,post=H);sp|P60880-2|SNP25_HUMAN(pre=R,post=H)	3	997.148	1	1	0	0	1	0	0	0	0	0.278664	0	Valid
466	20160312_08_A7.22541.22541.2 File:"20160312_08_A7.raw", NativeID:"controllerType=0 controllerNumber=1 scan=22541"	IGGIGTVPVGR+0.984VETGVLK	IGGIGTVPVGrVETGVLK	sp|Q5VTE0|EF1A3_HUMAN(pre=K,post=P);sp|P68104|EF1A1_HUMAN(pre=K,post=P);sp|P68104-2|EF1A1_HUMAN(pre=K,post=P);tr|A0A087WVQ9|A0A087WVQ9_HUMAN(pre=K,post=P)	2	877.015	1	0	1	0	1	0	1	1	0	0.425753	0	Valid
467	20160312_08_A7.22671.22671.2 File:"20160312_08_A7.raw", NativeID:"controllerType=0 controllerNumber=1 scan=22671"	VLPTVTWR+0.984GLK	VLPTVTWrGLK	sp|O95256|I18RA_HUMAN(pre=R,post=S);sp|O95256-2|I18RA_HUMAN(pre=R,post=S)	2	635.88	1	0	0	0	0	0	0	0	0	0.127083	0	Valid
468	20160312_08_A7.2432.2432.3 File:"20160312_08_A7.raw", NativeID:"controllerType=0 controllerNumber=1 scan=2432"	NR+0.984NEQESAVHPR	NrNEQESAVHPR	sp|Q9UJU6|DBNL_HUMAN(pre=R,post=E);sp|Q9UJU6-2|DBNL_HUMAN(pre=R,post=E);sp|Q9UJU6-4|DBNL_HUMAN(pre=R,post=E);sp|Q9UJU6-5|DBNL_HUMAN(pre=R,post=E);sp|Q9UJU6-6|DBNL_HUMAN(pre=R,post=E);tr|H0Y5J4|H0Y5J4_HUMAN(pre=R,post=E);tr|B4DDD6|B4DDD6_HUMAN(pre=R,post=E)	3	479.9	1	0	0	0	0	0	0	0	0	0.127083	0	Ambiguous
469	20160312_08_A7.24829.24829.4 File:"20160312_08_A7.raw", NativeID:"controllerType=0 controllerNumber=1 scan=24829"	RVTNDAR+0.984ENEMDENLEQVSGIIGNLR	RVTNDArENEMDENLEQVSGIIGNLR	sp|P60880|SNP25_HUMAN(pre=R,post=H);sp|P60880-2|SNP25_HUMAN(pre=R,post=H)	4	744.114	1	0	2	0	2	0	0	0	0	0.5062	1	Valid
470	20160312_08_A7.24835.24835.3 File:"20160312_08_A7.raw", NativeID:"controllerType=0 controllerNumber=1 scan=24835"	RVTNDAR+0.984ENEMDENLEQVSGIIGNLR	RVTNDArENEMDENLEQVSGIIGNLR	sp|P60880|SNP25_HUMAN(pre=R,post=H);sp|P60880-2|SNP25_HUMAN(pre=R,post=H)	3	991.816	1	0	2	0	2	0	0	0	0	0.5062	1	Valid
471	20160312_08_A7.24910.24910.3 File:"20160312_08_A7.raw", NativeID:"controllerType=0 controllerNumber=1 scan=24910"	QIENLQ+0.984ETETQ+0.984LR+0.984N+0.984ELEYVR	QIENLqETETqLrnELEYVR	sp|Q15431|SYCP1_HUMAN(pre=K,post=E);tr|A0A087WZC3|A0A087WZC3_HUMAN(pre=K,post=E);tr|Q5VXJ5|Q5VXJ5_HUMAN(pre=K,post=E)	3	837.07	1	0	0	3	3	0	1	1	0	0.839242	1	Valid
472	20160312_08_A7.25083.25083.4 File:"20160312_08_A7.raw", NativeID:"controllerType=0 controllerNumber=1 scan=25083"	R+0.984VTNDARENEMDENLEQVSGIIGNLR	rVTNDARENEMDENLEQVSGIIGNLR	sp|P60880|SNP25_HUMAN(pre=R,post=H);sp|P60880-2|SNP25_HUMAN(pre=R,post=H)	4	744.114	1	0	4	0	4	0	0	0	0	0.878318	1	Valid
473	20160312_08_A7.25266.25266.2 File:"20160312_08_A7.raw", NativeID:"controllerType=0 controllerNumber=1 scan=25266"	TLFILR+0.984GLPGSGK	TLFILrGLPGSGK	tr|K7ERC4|K7ERC4_HUMAN(pre=K,post=S);tr|C9K0L8|C9K0L8_HUMAN(pre=K,post=S);tr|K7ERZ0|K7ERZ0_HUMAN(pre=K,post=S);tr|K7EN66|K7EN66_HUMAN(pre=K,post=S);sp|P09543|CN37_HUMAN(pre=K,post=S);sp|P09543-2|CN37_HUMAN(pre=K,post=S)	2	680.404	1	0	3	1	4	1	0	1	0	0.932673	1	Valid
474	20160312_08_A7.2580.2580.3 File:"20160312_08_A7.raw", NativeID:"controllerType=0 controllerNumber=1 scan=2580"	NR+0.984NEQESAVHPR	NrNEQESAVHPR	sp|Q9UJU6|DBNL_HUMAN(pre=R,post=E);sp|Q9UJU6-2|DBNL_HUMAN(pre=R,post=E);sp|Q9UJU6-4|DBNL_HUMAN(pre=R,post=E);sp|Q9UJU6-5|DBNL_HUMAN(pre=R,post=E);sp|Q9UJU6-6|DBNL_HUMAN(pre=R,post=E);tr|H0Y5J4|H0Y5J4_HUMAN(pre=R,post=E);tr|B4DDD6|B4DDD6_HUMAN(pre=R,post=E)	3	479.9	1	0	0	0	0	0	0	0	0	0.127083	0	Valid
475	20160312_08_A7.2583.2583.3 File:"20160312_08_A7.raw", NativeID:"controllerType=0 controllerNumber=1 scan=2583"	RR+0.984LEEEER+0.984QK	RrLEEEErQK	sp|O14646|CHD1_HUMAN(pre=R,post=E);sp|O14646-2|CHD1_HUMAN(pre=R,post=E)	3	458.904	2	0	1	0	1	0	1	1	0	0.425753	0	Ambiguous
476	20160312_08_A7.2595.2595.2 File:"20160312_08_A7.raw", NativeID:"controllerType=0 controllerNumber=1 scan=2595"	NR+0.984NEQESAVHPR	NrNEQESAVHPR	sp|Q9UJU6|DBNL_HUMAN(pre=R,post=E);sp|Q9UJU6-2|DBNL_HUMAN(pre=R,post=E);sp|Q9UJU6-4|DBNL_HUMAN(pre=R,post=E);sp|Q9UJU6-5|DBNL_HUMAN(pre=R,post=E);sp|Q9UJU6-6|DBNL_HUMAN(pre=R,post=E);tr|H0Y5J4|H0Y5J4_HUMAN(pre=R,post=E);tr|B4DDD6|B4DDD6_HUMAN(pre=R,post=E)	2	719.346	1	1	0	0	1	0	0	0	0	0.278664	0	Valid
477	20160312_08_A7.26486.26486.2 File:"20160312_08_A7.raw", NativeID:"controllerType=0 controllerNumber=1 scan=26486"	PRQEIIQDLASM+15.995VR+0.984	PRQEIIQDLASmVr	sp|Q9H9G7|AGO3_HUMAN(pre=R,post=E);sp|Q9H9G7-2|AGO3_HUMAN(pre=R,post=E)	2	836.939	1	0	0	0	0	0	0	0	0	0.127083	0	Valid
478	20160312_08_A7.2654.2654.3 File:"20160312_08_A7.raw", NativeID:"controllerType=0 controllerNumber=1 scan=2654"	GR+0.984GSR+0.984GQHQAHSLER	GrGSrGQHQAHSLER	sp|P60201|MYPR_HUMAN(pre=K,post=V)	3	559.944	2	0	4	4	8	1	2	3	0	0.999605	1	Valid
479	20160312_08_A7.27276.27276.2 File:"20160312_08_A7.raw", NativeID:"controllerType=0 controllerNumber=1 scan=27276"	DLEALMFDR+0.984SFVGK	DLEALMFDrSFVGK	sp|P36871|PGM1_HUMAN(pre=K,post=Q);sp|P36871-2|PGM1_HUMAN(pre=K,post=Q);sp|P36871-3|PGM1_HUMAN(pre=K,post=Q);tr|A0A3B3ITK7|A0A3B3ITK7_HUMAN(pre=K,post=Q)	2	814.904	1	0	4	2	6	1	1	2	0	0.994687	1	Valid
480	20160312_08_A7.28269.28269.2 File:"20160312_08_A7.raw", NativeID:"controllerType=0 controllerNumber=1 scan=28269"	RTTPVAC+57.021SFPSTSGDLQ+0.984SAR+0.984GGAPPR	RTTPVAcSFPSTSGDLqSArGGAPPR	tr|E7ET34|E7ET34_HUMAN(pre=R,post=Q)	2	1338.15	1	0	1	1	2	0	0	0	0	0.5062	1	Valid
481	20160312_08_A7.28808.28808.3 File:"20160312_08_A7.raw", NativeID:"controllerType=0 controllerNumber=1 scan=28808"	GGALLTSPSGPGYHIM+15.995LPFITTFR+0.984	GGALLTSPSGPGYHImLPFITTFr	sp|O75477|ERLN1_HUMAN(pre=R,post=S);tr|B0QZ43|B0QZ43_HUMAN(pre=R,post=S)	3	850.774	1	0	0	0	0	0	0	0	0	0.127083	0	Valid
482	20160312_08_A7.29428.29428.2 File:"20160312_08_A7.raw", NativeID:"controllerType=0 controllerNumber=1 scan=29428"	RR+0.984Q+0.984QR+0.984PPGGNK	RrqQrPPGGNK	sp|O43310|CTIF_HUMAN(pre=R,post=P);sp|O43310-2|CTIF_HUMAN(pre=R,post=P)	2	648.843	2	0	0	0	0	0	0	0	0	0.127083	0	Ambiguous
483	20160312_08_A7.2974.2974.4 File:"20160312_08_A7.raw", NativeID:"controllerType=0 controllerNumber=1 scan=2974"	TTANR+0.984NHTDSAGTPHVSGGK	TTANrNHTDSAGTPHVSGGK	sp|Q5T5P2|SKT_HUMAN(pre=K,post=M);sp|Q5T5P2-2|SKT_HUMAN(pre=K,post=M);sp|Q5T5P2-3|SKT_HUMAN(pre=K,post=M);sp|Q5T5P2-4|SKT_HUMAN(pre=K,post=M);sp|Q5T5P2-7|SKT_HUMAN(pre=K,post=M);sp|Q5T5P2-6|SKT_HUMAN(pre=K,post=M);sp|Q5T5P2-8|SKT_HUMAN(pre=K,post=M);sp|Q5T5P2-9|SKT_HUMAN(pre=K,post=M);sp|Q5T5P2-10|SKT_HUMAN(pre=K,post=M);tr|Q5T5P0|Q5T5P0_HUMAN(pre=K,post=M);tr|Q5T5P1|Q5T5P1_HUMAN(pre=K,post=M)	4	502.992	1	0	0	0	0	0	0	0	0	0.127083	0	Ambiguous
484	20160312_08_A7.29925.29925.3 File:"20160312_08_A7.raw", NativeID:"controllerType=0 controllerNumber=1 scan=29925"	MPPPLPTR+0.984VDFSLAGALN+0.984AGFK	MPPPLPTrVDFSLAGALnAGFK	sp|P14136|GFAP_HUMAN(pre=R,post=E);sp|P14136-2|GFAP_HUMAN(pre=R,post=E);sp|P14136-3|GFAP_HUMAN(pre=R,post=E);tr|B4DIR1|B4DIR1_HUMAN(pre=R,post=E);tr|K7ELP4|K7ELP4_HUMAN(pre=R,post=E);tr|K7EMP8|K7EMP8_HUMAN(pre=R,post=E);tr|K7EKH9|K7EKH9_HUMAN(pre=R,post=E);tr|A0A1X7SCE1|A0A1X7SCE1_HUMAN(pre=R,post=E);tr|A0A1X7SBR3|A0A1X7SBR3_HUMAN(pre=R,post=E);tr|A0A1W2PR46|A0A1W2PR46_HUMAN(pre=R,post=E);tr|K7EJ…	3	767.737	1	0	0	0	0	0	0	0	0	0.127083	0	Valid
485	20160312_08_A7.30132.30132.3 File:"20160312_08_A7.raw", NativeID:"controllerType=0 controllerNumber=1 scan=30132"	MPPPLPTR+0.984VDFSLAGALN+0.984AGFK	MPPPLPTrVDFSLAGALnAGFK	sp|P14136|GFAP_HUMAN(pre=R,post=E);sp|P14136-2|GFAP_HUMAN(pre=R,post=E);sp|P14136-3|GFAP_HUMAN(pre=R,post=E);tr|B4DIR1|B4DIR1_HUMAN(pre=R,post=E);tr|K7ELP4|K7ELP4_HUMAN(pre=R,post=E);tr|K7EMP8|K7EMP8_HUMAN(pre=R,post=E);tr|K7EKH9|K7EKH9_HUMAN(pre=R,post=E);tr|A0A1X7SCE1|A0A1X7SCE1_HUMAN(pre=R,post=E);tr|A0A1X7SBR3|A0A1X7SBR3_HUMAN(pre=R,post=E);tr|A0A1W2PR46|A0A1W2PR46_HUMAN(pre=R,post=E);tr|K7EJ…	3	767.737	1	0	0	0	0	0	0	0	0	0.127083	0	Valid
486	20160312_08_A7.3215.3215.3 File:"20160312_08_A7.raw", NativeID:"controllerType=0 controllerNumber=1 scan=3215"	HSSGGGSR+0.984GGSSSGGGYGSGGGGSSSVK	HSSGGGSrGGSSSGGGYGSGGGGSSSVK	sp|P35908|K22E_HUMAN(pre=K,post=G)	3	772.335	1	0	1	0	1	0	0	0	0	0.278664	0	Ambiguous
487	20160312_08_A7.3651.3651.3 File:"20160312_08_A7.raw", NativeID:"controllerType=0 controllerNumber=1 scan=3651"	SVPHEEYR+0.984SHDGK	SVPHEEYrSHDGK	sp|Q9P2K5|MYEF2_HUMAN(pre=K,post=T);sp|Q9P2K5-2|MYEF2_HUMAN(pre=K,post=T);tr|A0A0A0MQW0|A0A0A0MQW0_HUMAN(pre=K,post=T);tr|A0A0A0MR39|A0A0A0MR39_HUMAN(pre=K,post=T);tr|A0A087WUT0|A0A087WUT0_HUMAN(pre=K,post=T);tr|H0YN19|H0YN19_HUMAN(pre=K,post=T)	3	514.571	1	0	6	3	9	0	0	0	0	0.998948	1	Valid
488	20160312_08_A7.4040.4040.2 File:"20160312_08_A7.raw", NativeID:"controllerType=0 controllerNumber=1 scan=4040"	TDEEGDFR+0.984HK	TDEEGDFrHK	sp|Q9BX67|JAM3_HUMAN(pre=R,post=S);sp|Q9BX67-2|JAM3_HUMAN(pre=R,post=S)	2	617.771	1	0	7	7	14	1	0	1	0	0.999996	1	Valid
489	20160312_08_A7.4624.4624.3 File:"20160312_08_A7.raw", NativeID:"controllerType=0 controllerNumber=1 scan=4624"	KEPSTVSR+0.984DEVRR	KEPSTVSrDEVRR	sp|P11137|MTAP2_HUMAN(pre=K,post=K);sp|P11137-3|MTAP2_HUMAN(pre=K,post=K)	3	520.61	1	0	10	6	16	1	0	1	0	0.999999	1	Valid
490	20160312_08_A7.4807.4807.3 File:"20160312_08_A7.raw", NativeID:"controllerType=0 controllerNumber=1 scan=4807"	EIPEQ+0.984R+0.984ENKQ+0.984Q+0.984Q+0.984KKRKVQDK	EIPEqrENKqqqKKRKVQDK	sp|Q9BXY4|RSPO3_HUMAN(pre=K,post=Q);sp|Q9BXY4-2|RSPO3_HUMAN(pre=K,post=Q)	3	848.109	1	0	0	1	1	0	0	0	0	0.278664	0	Valid
491	20160312_08_A7.4991.4991.3 File:"20160312_08_A7.raw", NativeID:"controllerType=0 controllerNumber=1 scan=4991"	EEQELHDIHSTR+0.984SK	EEQELHDIHSTrSK	sp|P51674|GPM6A_HUMAN(pre=K,post=E);sp|P51674-2|GPM6A_HUMAN(pre=K,post=E);sp|P51674-3|GPM6A_HUMAN(pre=K,post=E)	3	570.608	1	0	13	5	18	0	1	1	0	1	1	Valid
492	20160312_08_A7.5035.5035.3 File:"20160312_08_A7.raw", NativeID:"controllerType=0 controllerNumber=1 scan=5035"	KEPSTVSR+0.984DEVR	KEPSTVSrDEVR	sp|P11137|MTAP2_HUMAN(pre=K,post=R);sp|P11137-3|MTAP2_HUMAN(pre=K,post=R)	3	468.576	1	0	1	0	1	0	0	0	0	0.278664	0	Valid
493	20160312_08_A7.5077.5077.2 File:"20160312_08_A7.raw", NativeID:"controllerType=0 controllerNumber=1 scan=5077"	KEPSTVSR+0.984DEVR	KEPSTVSrDEVR	sp|P11137|MTAP2_HUMAN(pre=K,post=R);sp|P11137-3|MTAP2_HUMAN(pre=K,post=R)	2	702.36	1	1	4	0	5	0	0	0	0	0.950382	1	Valid
494	20160312_08_A7.5198.5198.3 File:"20160312_08_A7.raw", NativeID:"controllerType=0 controllerNumber=1 scan=5198"	KEPSTVSR+0.984DEVR	KEPSTVSrDEVR	sp|P11137|MTAP2_HUMAN(pre=K,post=R);sp|P11137-3|MTAP2_HUMAN(pre=K,post=R)	3	468.576	1	0	2	0	2	0	0	0	0	0.5062	1	Valid
495	20160312_08_A7.5663.5663.3 File:"20160312_08_A7.raw", NativeID:"controllerType=0 controllerNumber=1 scan=5663"	DSHHPAR+0.984TAHYGSLPQK	DSHHPArTAHYGSLPQK	tr|H7BYR8|H7BYR8_HUMAN(pre=K,post=S);sp|P02686|MBP_HUMAN(pre=K,post=S);sp|P02686-3|MBP_HUMAN(pre=K,post=S);sp|P02686-4|MBP_HUMAN(pre=K,post=S);sp|P02686-5|MBP_HUMAN(pre=K,post=S);sp|P02686-6|MBP_HUMAN(pre=K,post=S);tr|C9J6H1|C9J6H1_HUMAN(pre=K,post=S);tr|E9PKX9|E9PKX9_HUMAN(pre=K,post=H);tr|J3QL64|J3QL64_HUMAN(pre=K,post=S);tr|E9PJ72|E9PJ72_HUMAN(pre=K,post=S);tr|J3QKL5|J3QKL5_HUMAN(pre=K,post=S)…	3	634.979	1	1	11	4	16	0	1	1	0	0.999999	1	Valid
496	20160312_08_A7.5679.5679.2 File:"20160312_08_A7.raw", NativeID:"controllerType=0 controllerNumber=1 scan=5679"	DSHHPAR+0.984TAHYGSLPQK	DSHHPArTAHYGSLPQK	tr|H7BYR8|H7BYR8_HUMAN(pre=K,post=S);sp|P02686|MBP_HUMAN(pre=K,post=S);sp|P02686-3|MBP_HUMAN(pre=K,post=S);sp|P02686-4|MBP_HUMAN(pre=K,post=S);sp|P02686-5|MBP_HUMAN(pre=K,post=S);sp|P02686-6|MBP_HUMAN(pre=K,post=S);tr|C9J6H1|C9J6H1_HUMAN(pre=K,post=S);tr|E9PKX9|E9PKX9_HUMAN(pre=K,post=H);tr|J3QL64|J3QL64_HUMAN(pre=K,post=S);tr|E9PJ72|E9PJ72_HUMAN(pre=K,post=S);tr|J3QKL5|J3QKL5_HUMAN(pre=K,post=S)…	2	951.964	1	1	4	1	6	0	0	0	0	0.980705	1	Valid
497	20160312_08_A7.5698.5698.4 File:"20160312_08_A7.raw", NativeID:"controllerType=0 controllerNumber=1 scan=5698"	DSHHPAR+0.984TAHYGSLPQK	DSHHPArTAHYGSLPQK	tr|H7BYR8|H7BYR8_HUMAN(pre=K,post=S);sp|P02686|MBP_HUMAN(pre=K,post=S);sp|P02686-3|MBP_HUMAN(pre=K,post=S);sp|P02686-4|MBP_HUMAN(pre=K,post=S);sp|P02686-5|MBP_HUMAN(pre=K,post=S);sp|P02686-6|MBP_HUMAN(pre=K,post=S);tr|C9J6H1|C9J6H1_HUMAN(pre=K,post=S);tr|E9PKX9|E9PKX9_HUMAN(pre=K,post=H);tr|J3QL64|J3QL64_HUMAN(pre=K,post=S);tr|E9PJ72|E9PJ72_HUMAN(pre=K,post=S);tr|J3QKL5|J3QKL5_HUMAN(pre=K,post=S)…	4	476.486	1	0	12	7	19	1	1	2	0	1	1	Valid
498	20160312_08_A7.5830.5830.3 File:"20160312_08_A7.raw", NativeID:"controllerType=0 controllerNumber=1 scan=5830"	DSHHPAR+0.984TAHYGSLPQK	DSHHPArTAHYGSLPQK	tr|H7BYR8|H7BYR8_HUMAN(pre=K,post=S);sp|P02686|MBP_HUMAN(pre=K,post=S);sp|P02686-3|MBP_HUMAN(pre=K,post=S);sp|P02686-4|MBP_HUMAN(pre=K,post=S);sp|P02686-5|MBP_HUMAN(pre=K,post=S);sp|P02686-6|MBP_HUMAN(pre=K,post=S);tr|C9J6H1|C9J6H1_HUMAN(pre=K,post=S);tr|E9PKX9|E9PKX9_HUMAN(pre=K,post=H);tr|J3QL64|J3QL64_HUMAN(pre=K,post=S);tr|E9PJ72|E9PJ72_HUMAN(pre=K,post=S);tr|J3QKL5|J3QKL5_HUMAN(pre=K,post=S)…	3	634.979	1	1	17	6	24	1	1	2	0	1	1	Valid
499	20160312_08_A7.5843.5843.2 File:"20160312_08_A7.raw", NativeID:"controllerType=0 controllerNumber=1 scan=5843"	DSHHPAR+0.984TAHYGSLPQK	DSHHPArTAHYGSLPQK	tr|H7BYR8|H7BYR8_HUMAN(pre=K,post=S);sp|P02686|MBP_HUMAN(pre=K,post=S);sp|P02686-3|MBP_HUMAN(pre=K,post=S);sp|P02686-4|MBP_HUMAN(pre=K,post=S);sp|P02686-5|MBP_HUMAN(pre=K,post=S);sp|P02686-6|MBP_HUMAN(pre=K,post=S);tr|C9J6H1|C9J6H1_HUMAN(pre=K,post=S);tr|E9PKX9|E9PKX9_HUMAN(pre=K,post=H);tr|J3QL64|J3QL64_HUMAN(pre=K,post=S);tr|E9PJ72|E9PJ72_HUMAN(pre=K,post=S);tr|J3QKL5|J3QKL5_HUMAN(pre=K,post=S)…	2	951.964	1	3	16	6	25	0	1	1	0	1	1	Valid
500	20160312_08_A7.5861.5861.4 File:"20160312_08_A7.raw", NativeID:"controllerType=0 controllerNumber=1 scan=5861"	DSHHPAR+0.984TAHYGSLPQK	DSHHPArTAHYGSLPQK	tr|H7BYR8|H7BYR8_HUMAN(pre=K,post=S);sp|P02686|MBP_HUMAN(pre=K,post=S);sp|P02686-3|MBP_HUMAN(pre=K,post=S);sp|P02686-4|MBP_HUMAN(pre=K,post=S);sp|P02686-5|MBP_HUMAN(pre=K,post=S);sp|P02686-6|MBP_HUMAN(pre=K,post=S);tr|C9J6H1|C9J6H1_HUMAN(pre=K,post=S);tr|E9PKX9|E9PKX9_HUMAN(pre=K,post=H);tr|J3QL64|J3QL64_HUMAN(pre=K,post=S);tr|E9PJ72|E9PJ72_HUMAN(pre=K,post=S);tr|J3QKL5|J3QKL5_HUMAN(pre=K,post=S)…	4	476.486	1	0	0	1	1	0	0	0	0	0.278664	0	Valid
501	20160312_08_A7.5981.5981.3 File:"20160312_08_A7.raw", NativeID:"controllerType=0 controllerNumber=1 scan=5981"	DSHHPAR+0.984TAHYGSLPQK	DSHHPArTAHYGSLPQK	tr|H7BYR8|H7BYR8_HUMAN(pre=K,post=S);sp|P02686|MBP_HUMAN(pre=K,post=S);sp|P02686-3|MBP_HUMAN(pre=K,post=S);sp|P02686-4|MBP_HUMAN(pre=K,post=S);sp|P02686-5|MBP_HUMAN(pre=K,post=S);sp|P02686-6|MBP_HUMAN(pre=K,post=S);tr|C9J6H1|C9J6H1_HUMAN(pre=K,post=S);tr|E9PKX9|E9PKX9_HUMAN(pre=K,post=H);tr|J3QL64|J3QL64_HUMAN(pre=K,post=S);tr|E9PJ72|E9PJ72_HUMAN(pre=K,post=S);tr|J3QKL5|J3QKL5_HUMAN(pre=K,post=S)…	3	634.979	1	1	13	6	20	1	1	2	0	1	1	Valid
502	20160312_08_A7.5983.5983.2 File:"20160312_08_A7.raw", NativeID:"controllerType=0 controllerNumber=1 scan=5983"	DSHHPAR+0.984TAHYGSLPQK	DSHHPArTAHYGSLPQK	tr|H7BYR8|H7BYR8_HUMAN(pre=K,post=S);sp|P02686|MBP_HUMAN(pre=K,post=S);sp|P02686-3|MBP_HUMAN(pre=K,post=S);sp|P02686-4|MBP_HUMAN(pre=K,post=S);sp|P02686-5|MBP_HUMAN(pre=K,post=S);sp|P02686-6|MBP_HUMAN(pre=K,post=S);tr|C9J6H1|C9J6H1_HUMAN(pre=K,post=S);tr|E9PKX9|E9PKX9_HUMAN(pre=K,post=H);tr|J3QL64|J3QL64_HUMAN(pre=K,post=S);tr|E9PJ72|E9PJ72_HUMAN(pre=K,post=S);tr|J3QKL5|J3QKL5_HUMAN(pre=K,post=S)…	2	951.964	1	3	15	3	21	0	0	0	0	1	1	Valid
503	20160312_08_A7.6017.6017.4 File:"20160312_08_A7.raw", NativeID:"controllerType=0 controllerNumber=1 scan=6017"	DSHHPAR+0.984TAHYGSLPQK	DSHHPArTAHYGSLPQK	tr|H7BYR8|H7BYR8_HUMAN(pre=K,post=S);sp|P02686|MBP_HUMAN(pre=K,post=S);sp|P02686-3|MBP_HUMAN(pre=K,post=S);sp|P02686-4|MBP_HUMAN(pre=K,post=S);sp|P02686-5|MBP_HUMAN(pre=K,post=S);sp|P02686-6|MBP_HUMAN(pre=K,post=S);tr|C9J6H1|C9J6H1_HUMAN(pre=K,post=S);tr|E9PKX9|E9PKX9_HUMAN(pre=K,post=H);tr|J3QL64|J3QL64_HUMAN(pre=K,post=S);tr|E9PJ72|E9PJ72_HUMAN(pre=K,post=S);tr|J3QKL5|J3QKL5_HUMAN(pre=K,post=S)…	4	476.486	1	0	1	0	1	0	0	0	0	0.278664	0	Valid
504	20160312_08_A7.6193.6193.3 File:"20160312_08_A7.raw", NativeID:"controllerType=0 controllerNumber=1 scan=6193"	REKPEEFQTR+0.984VR	REKPEEFQTrVR	sp|P26232|CTNA2_HUMAN(pre=K,post=R);sp|P26232-2|CTNA2_HUMAN(pre=K,post=R);sp|P26232-3|CTNA2_HUMAN(pre=K,post=R);sp|P26232-4|CTNA2_HUMAN(pre=K,post=R);sp|P26232-5|CTNA2_HUMAN(pre=K,post=R);sp|P26232-6|CTNA2_HUMAN(pre=K,post=R);tr|A0A0A0MRI5|A0A0A0MRI5_HUMAN(pre=K,post=R);tr|A0A0A0MTJ6|A0A0A0MTJ6_HUMAN(pre=K,post=R)	3	525.947	1	1	3	0	4	0	0	0	0	0.878318	1	Valid
505	20160312_08_A7.6231.6231.4 File:"20160312_08_A7.raw", NativeID:"controllerType=0 controllerNumber=1 scan=6231"	DSHHPAR+0.984TAHYGSLPQ+0.984K	DSHHPArTAHYGSLPqK	tr|H7BYR8|H7BYR8_HUMAN(pre=K,post=S);sp|P02686|MBP_HUMAN(pre=K,post=S);sp|P02686-3|MBP_HUMAN(pre=K,post=S);sp|P02686-4|MBP_HUMAN(pre=K,post=S);sp|P02686-5|MBP_HUMAN(pre=K,post=S);sp|P02686-6|MBP_HUMAN(pre=K,post=S);tr|C9J6H1|C9J6H1_HUMAN(pre=K,post=S);tr|E9PKX9|E9PKX9_HUMAN(pre=K,post=H);tr|J3QL64|J3QL64_HUMAN(pre=K,post=S);tr|E9PJ72|E9PJ72_HUMAN(pre=K,post=S);tr|J3QKL5|J3QKL5_HUMAN(pre=K,post=S)…	4	476.732	1	0	3	1	4	0	0	0	0	0.878318	1	Valid
506	20160312_08_A7.6920.6920.5 File:"20160312_08_A7.raw", NativeID:"controllerType=0 controllerNumber=1 scan=6920"	VGNPLDR+0.984DTDHGPQNHHAHLVK	VGNPLDrDTDHGPQNHHAHLVK	sp|O75891|AL1L1_HUMAN(pre=K,post=L);sp|O75891-2|AL1L1_HUMAN(pre=K,post=L);sp|O75891-3|AL1L1_HUMAN(pre=K,post=L)	5	492.446	1	0	4	2	6	0	0	0	0	0.980705	1	Valid
507	20160312_08_A7.8906.8906.5 File:"20160312_08_A7.raw", NativeID:"controllerType=0 controllerNumber=1 scan=8906"	KWQ+0.984EEM+15.995ELYR+0.984Q+0.984KVEPLR	KWqEEmELYrqKVEPLR	sp|P02647|APOA1_HUMAN(pre=K,post=A);tr|F8W696|F8W696_HUMAN(pre=K,post=A)	5	457.03	1	0	0	0	0	0	0	0	0	0.127083	0	Valid
508	20160312_08_A7.9137.9137.2 File:"20160312_08_A7.raw", NativeID:"controllerType=0 controllerNumber=1 scan=9137"	WLNSGR+0.984GDEASEEGQN+0.984GSSPK	WLNSGrGDEASEEGQnGSSPK	sp|P35611|ADDA_HUMAN(pre=R,post=S);sp|P35611-2|ADDA_HUMAN(pre=R,post=S);sp|P35611-3|ADDA_HUMAN(pre=R,post=S);sp|P35611-4|ADDA_HUMAN(pre=R,post=S);sp|P35611-5|ADDA_HUMAN(pre=R,post=S);sp|P35611-6|ADDA_HUMAN(pre=R,post=S);tr|E7ENY0|E7ENY0_HUMAN(pre=R,post=S);tr|H0Y9H2|H0Y9H2_HUMAN(pre=R,post=S);tr|E7EV99|E7EV99_HUMAN(pre=R,post=S)	2	1103.98	1	0	0	0	0	0	0	0	0	0.127083	0	Ambiguous
509	20160312_08_A7.9231.9231.3 File:"20160312_08_A7.raw", NativeID:"controllerType=0 controllerNumber=1 scan=9231"	LKPEADTLPR+0.984SGEQER	LKPEADTLPrSGEQER	sp|Q14CZ8|HECAM_HUMAN(pre=R,post=K)	3	609.647	1	0	2	1	3	2	0	2	0	0.909249	1	Valid
510	20160312_08_A7.9274.9274.2 File:"20160312_08_A7.raw", NativeID:"controllerType=0 controllerNumber=1 scan=9274"	LKPEADTLPR+0.984SGEQER	LKPEADTLPrSGEQER	sp|Q14CZ8|HECAM_HUMAN(pre=R,post=K)	2	913.966	1	0	2	0	2	0	0	0	0	0.5062	1	Valid
511	20160312_08_A7.9955.9955.3 File:"20160312_08_A7.raw", NativeID:"controllerType=0 controllerNumber=1 scan=9955"	RDHQLR+0.984LLEAQK	RDHQLrLLEAQK	sp|Q7Z4S6|KI21A_HUMAN(pre=K,post=R);sp|Q7Z4S6-2|KI21A_HUMAN(pre=K,post=R);sp|Q7Z4S6-3|KI21A_HUMAN(pre=K,post=R);sp|Q7Z4S6-4|KI21A_HUMAN(pre=K,post=R);sp|Q7Z4S6-5|KI21A_HUMAN(pre=K,post=R);tr|A0A1B0GV47|A0A1B0GV47_HUMAN(pre=K,post=R);tr|H0YHT2|H0YHT2_HUMAN(pre=K,post=R);tr|H0YIM6|H0YIM6_HUMAN(pre=K,post=R)	3	503.283	1	0	2	0	2	0	0	0	0	0.5062	1	Valid
512	20160312_09_A8.10623.10623.2 File:"20160312_09_A8.raw", NativeID:"controllerType=0 controllerNumber=1 scan=10623"	VFGDGSR+0.984LSAR	VFGDGSrLSAR	sp|Q16352|AINX_HUMAN(pre=K,post=L)	2	583.302	1	0	10	0	10	0	0	0	0	0.999603	1	Valid
513	20160312_09_A8.10760.10760.3 File:"20160312_09_A8.raw", NativeID:"controllerType=0 controllerNumber=1 scan=10760"	LEHSSFPEGPGPGSGDEANGPR+0.984GER	LEHSSFPEGPGPGSGDEANGPrGER	sp|O15020|SPTN2_HUMAN(pre=R,post=Q);sp|O15020-2|SPTN2_HUMAN(pre=R,post=Q);tr|A4QPE4|A4QPE4_HUMAN(pre=R,post=Q)	3	846.382	1	0	1	0	1	0	0	0	0	0.278664	0	Valid
514	20160312_09_A8.10772.10772.2 File:"20160312_09_A8.raw", NativeID:"controllerType=0 controllerNumber=1 scan=10772"	VFGDGSR+0.984LSAR	VFGDGSrLSAR	sp|Q16352|AINX_HUMAN(pre=K,post=L)	2	583.302	1	0	3	0	3	0	0	0	0	0.731196	1	Valid
515	20160312_09_A8.10864.10864.4 File:"20160312_09_A8.raw", NativeID:"controllerType=0 controllerNumber=1 scan=10864"	LEHSSFPEGPGPGSGDEANGPR+0.984GER	LEHSSFPEGPGPGSGDEANGPrGER	sp|O15020|SPTN2_HUMAN(pre=R,post=Q);sp|O15020-2|SPTN2_HUMAN(pre=R,post=Q);tr|A4QPE4|A4QPE4_HUMAN(pre=R,post=Q)	4	635.038	1	0	1	1	2	0	0	0	0	0.5062	1	Valid
516	20160312_09_A8.11163.11163.2 File:"20160312_09_A8.raw", NativeID:"controllerType=0 controllerNumber=1 scan=11163"	VFGDGSR+0.984LSAR	VFGDGSrLSAR	sp|Q16352|AINX_HUMAN(pre=K,post=L)	2	583.302	1	0	5	0	5	0	0	0	0	0.950382	1	Valid
517	20160312_09_A8.11232.11232.2 File:"20160312_09_A8.raw", NativeID:"controllerType=0 controllerNumber=1 scan=11232"	DIRRC+57.021HR+0.984M+15.995SRRPLPR	DIRRcHrmSRRPLPR	sp|O95503|CBX6_HUMAN(pre=K,post=P);tr|B0QXZ6|B0QXZ6_HUMAN(pre=K,post=P)	2	1012.04	1	0	1	2	3	0	0	0	0	0.731196	1	Valid
518	20160312_09_A8.12629.12629.2 File:"20160312_09_A8.raw", NativeID:"controllerType=0 controllerNumber=1 scan=12629"	LAELR+0.984GVPR	LAELrGVPR	sp|Q16555|DPYL2_HUMAN(pre=R,post=G);sp|Q16555-2|DPYL2_HUMAN(pre=R,post=G);tr|A0A1C7CYX9|A0A1C7CYX9_HUMAN(pre=R,post=G)	2	506.301	1	1	9	2	12	2	1	3	0	0.999992	1	Valid
519	20160312_09_A8.13073.13073.2 File:"20160312_09_A8.raw", NativeID:"controllerType=0 controllerNumber=1 scan=13073"	YR+0.984AITSAYYR	YrAITSAYYR	sp|P57735|RAB25_HUMAN(pre=R,post=G);sp|P62491|RB11A_HUMAN(pre=R,post=G);sp|P62491-2|RB11A_HUMAN(pre=R,post=G);sp|Q15907|RB11B_HUMAN(pre=R,post=G);sp|Q15907-2|RB11B_HUMAN(pre=R,post=G);tr|H3BMH2|H3BMH2_HUMAN(pre=R,post=G);tr|H3BSC1|H3BSC1_HUMAN(pre=R,post=G)	2	632.82	1	0	2	0	2	0	0	0	0	0.5062	1	Valid
520	20160312_09_A8.13283.13283.2 File:"20160312_09_A8.raw", NativeID:"controllerType=0 controllerNumber=1 scan=13283"	YR+0.984TITTAYYR	YrTITTAYYR	sp|O95716|RAB3D_HUMAN(pre=R,post=G);sp|P20337|RAB3B_HUMAN(pre=R,post=G);sp|P20336|RAB3A_HUMAN(pre=R,post=G);sp|Q96E17|RAB3C_HUMAN(pre=R,post=G);tr|M0R257|M0R257_HUMAN(pre=R,post=G)	2	654.833	1	0	1	0	1	0	0	0	0	0.278664	0	Valid
521	20160312_09_A8.13966.13966.2 File:"20160312_09_A8.raw", NativeID:"controllerType=0 controllerNumber=1 scan=13966"	ITSDR+0.984LLIK	ITSDrLLIK	sp|Q16555|DPYL2_HUMAN(pre=R,post=G);sp|Q14195|DPYL3_HUMAN(pre=R,post=G);tr|D6RF19|D6RF19_HUMAN(pre=R,post=G)	2	530.325	1	0	5	5	10	0	2	2	0	0.999892	1	Valid
522	20160312_09_A8.16215.16215.4 File:"20160312_09_A8.raw", NativeID:"controllerType=0 controllerNumber=1 scan=16215"	QR+0.984PEVIKPVFDLGETEEKK	QrPEVIKPVFDLGETEEKK	sp|Q8WXG6|MADD_HUMAN(pre=K,post=S);sp|Q8WXG6-7|MADD_HUMAN(pre=K,post=S)	4	561.554	1	0	0	0	0	0	0	0	0	0.127083	0	Ambiguous
523	20160312_09_A8.16325.16325.4 File:"20160312_09_A8.raw", NativeID:"controllerType=0 controllerNumber=1 scan=16325"	FRDGPPLR+0.984GSNMDFREPTEEER	FRDGPPLrGSNMDFREPTEEER	sp|Q15056|IF4H_HUMAN(pre=R,post=A);sp|Q15056-2|IF4H_HUMAN(pre=R,post=A)	4	659.81	1	0	0	1	1	0	0	0	0	0.278664	0	Valid
524	20160312_09_A8.17038.17038.2 File:"20160312_09_A8.raw", NativeID:"controllerType=0 controllerNumber=1 scan=17038"	DMR+0.984QTVAVGVIK	DMrQTVAVGVIK	sp|Q5VTE0|EF1A3_HUMAN(pre=R,post=A);sp|P68104|EF1A1_HUMAN(pre=R,post=A);sp|P68104-2|EF1A1_HUMAN(pre=R,post=A);sp|Q05639|EF1A2_HUMAN(pre=R,post=N);tr|A0A087WVQ9|A0A087WVQ9_HUMAN(pre=R,post=A);tr|A0A2U3TZH3|A0A2U3TZH3_HUMAN(pre=R,post=N)	2	659.364	1	0	3	2	5	4	2	6	0	0.998956	1	Valid
525	20160312_09_A8.18678.18678.2 File:"20160312_09_A8.raw", NativeID:"controllerType=0 controllerNumber=1 scan=18678"	LSLAR+0.984M+15.995PPPLPTR	LSLArmPPPLPTR	sp|P14136|GFAP_HUMAN(pre=R,post=V);sp|P14136-2|GFAP_HUMAN(pre=R,post=V);sp|P14136-3|GFAP_HUMAN(pre=R,post=V);tr|B4DIR1|B4DIR1_HUMAN(pre=R,post=V);tr|K7ELP4|K7ELP4_HUMAN(pre=R,post=V);tr|K7EMP8|K7EMP8_HUMAN(pre=R,post=V);tr|K7EKH9|K7EKH9_HUMAN(pre=R,post=V);tr|A0A1X7SCE1|A0A1X7SCE1_HUMAN(pre=R,post=V);tr|A0A1X7SBR3|A0A1X7SBR3_HUMAN(pre=R,post=V);tr|A0A1W2PR46|A0A1W2PR46_HUMAN(pre=R,post=V);tr|K7EJ…	2	733.414	1	0	1	1	2	1	0	1	0	0.663002	1	Valid
526	20160312_09_A8.19770.19770.2 File:"20160312_09_A8.raw", NativeID:"controllerType=0 controllerNumber=1 scan=19770"	RR+0.984VR+0.984SEAELQ+0.984QLR	RrVrSEAELqQLR	sp|Q7RTS3|PTF1A_HUMAN(pre=R,post=Q)	2	822.445	2	0	3	0	3	0	0	0	0	0.731196	1	Valid
527	20160312_09_A8.20202.20202.2 File:"20160312_09_A8.raw", NativeID:"controllerType=0 controllerNumber=1 scan=20202"	FSWGAEGQR+0.984PGFGYGGR	FSWGAEGQrPGFGYGGR	sp|P02686|MBP_HUMAN(pre=R,post=A);sp|P02686-3|MBP_HUMAN(pre=R,post=A);sp|P02686-5|MBP_HUMAN(pre=R,post=A);tr|C9J6H1|C9J6H1_HUMAN(pre=R,post=A);tr|J3QL64|J3QL64_HUMAN(pre=R,post=A);tr|E9PJ72|E9PJ72_HUMAN(pre=R,post=A);tr|A8MZH3|A8MZH3_HUMAN(pre=R,post=A)	2	915.422	1	0	5	2	7	0	0	0	0	0.99264	1	Valid
528	20160312_09_A8.20214.20214.3 File:"20160312_09_A8.raw", NativeID:"controllerType=0 controllerNumber=1 scan=20214"	FSWGAEGQR+0.984PGFGYGGR	FSWGAEGQrPGFGYGGR	sp|P02686|MBP_HUMAN(pre=R,post=A);sp|P02686-3|MBP_HUMAN(pre=R,post=A);sp|P02686-5|MBP_HUMAN(pre=R,post=A);tr|C9J6H1|C9J6H1_HUMAN(pre=R,post=A);tr|J3QL64|J3QL64_HUMAN(pre=R,post=A);tr|E9PJ72|E9PJ72_HUMAN(pre=R,post=A);tr|A8MZH3|A8MZH3_HUMAN(pre=R,post=A)	3	610.617	1	0	0	3	3	1	2	3	0	0.950565	1	Valid
529	20160312_09_A8.20287.20287.2 File:"20160312_09_A8.raw", NativeID:"controllerType=0 controllerNumber=1 scan=20287"	APGIIPR+0.984ISVR	APGIIPrISVR	tr|K7EK77|K7EK77_HUMAN(pre=K,post=E);tr|K7ENJ4|K7ENJ4_HUMAN(pre=K,post=E);tr|K7ERX7|K7ERX7_HUMAN(pre=K,post=E);tr|K7EJP1|K7EJP1_HUMAN(pre=K,post=E);sp|P25705|ATPA_HUMAN(pre=K,post=E);sp|P25705-2|ATPA_HUMAN(pre=K,post=E);sp|P25705-3|ATPA_HUMAN(pre=K,post=E)	2	590.365	1	0	5	1	6	2	0	2	0	0.994687	1	Valid
530	20160312_09_A8.20309.20309.2 File:"20160312_09_A8.raw", NativeID:"controllerType=0 controllerNumber=1 scan=20309"	APGIIPR+0.984ISVR	APGIIPrISVR	tr|K7EK77|K7EK77_HUMAN(pre=K,post=E);tr|K7ENJ4|K7ENJ4_HUMAN(pre=K,post=E);tr|K7ERX7|K7ERX7_HUMAN(pre=K,post=E);tr|K7EJP1|K7EJP1_HUMAN(pre=K,post=E);sp|P25705|ATPA_HUMAN(pre=K,post=E);sp|P25705-2|ATPA_HUMAN(pre=K,post=E);sp|P25705-3|ATPA_HUMAN(pre=K,post=E)	2	590.365	1	0	4	1	5	2	0	2	0	0.986023	1	Valid
531	20160312_09_A8.20364.20364.2 File:"20160312_09_A8.raw", NativeID:"controllerType=0 controllerNumber=1 scan=20364"	FSWGAEGQR+0.984PGFGYGGR	FSWGAEGQrPGFGYGGR	sp|P02686|MBP_HUMAN(pre=R,post=A);sp|P02686-3|MBP_HUMAN(pre=R,post=A);sp|P02686-5|MBP_HUMAN(pre=R,post=A);tr|C9J6H1|C9J6H1_HUMAN(pre=R,post=A);tr|J3QL64|J3QL64_HUMAN(pre=R,post=A);tr|E9PJ72|E9PJ72_HUMAN(pre=R,post=A);tr|A8MZH3|A8MZH3_HUMAN(pre=R,post=A)	2	915.422	1	0	3	2	5	1	0	1	0	0.973517	1	Valid
532	20160312_09_A8.2074.2074.3 File:"20160312_09_A8.raw", NativeID:"controllerType=0 controllerNumber=1 scan=2074"	NR+0.984NEQESAVHPR	NrNEQESAVHPR	sp|Q9UJU6|DBNL_HUMAN(pre=R,post=E);sp|Q9UJU6-2|DBNL_HUMAN(pre=R,post=E);sp|Q9UJU6-4|DBNL_HUMAN(pre=R,post=E);sp|Q9UJU6-5|DBNL_HUMAN(pre=R,post=E);sp|Q9UJU6-6|DBNL_HUMAN(pre=R,post=E);tr|H0Y5J4|H0Y5J4_HUMAN(pre=R,post=E);tr|B4DDD6|B4DDD6_HUMAN(pre=R,post=E)	3	479.9	1	0	0	0	0	0	0	0	0	0.127083	0	Ambiguous
533	20160312_09_A8.2189.2189.3 File:"20160312_09_A8.raw", NativeID:"controllerType=0 controllerNumber=1 scan=2189"	YPRR+0.984R+0.984GPPR	YPRrrGPPR	sp|P67809|YBOX1_HUMAN(pre=R,post=N);tr|H0Y449|H0Y449_HUMAN(pre=R,post=N);tr|C9J5V9|C9J5V9_HUMAN(pre=R,post=N)	3	386.217	2	0	0	1	1	0	2	2	0	0.587272	1	Valid
534	20160312_09_A8.22699.22699.2 File:"20160312_09_A8.raw", NativeID:"controllerType=0 controllerNumber=1 scan=22699"	IGGIGTVPVGR+0.984VETGVLK	IGGIGTVPVGrVETGVLK	sp|Q5VTE0|EF1A3_HUMAN(pre=K,post=P);sp|P68104|EF1A1_HUMAN(pre=K,post=P);sp|P68104-2|EF1A1_HUMAN(pre=K,post=P);tr|A0A087WVQ9|A0A087WVQ9_HUMAN(pre=K,post=P)	2	877.015	1	0	1	0	1	0	1	1	0	0.425753	0	Valid
535	20160312_09_A8.23907.23907.2 File:"20160312_09_A8.raw", NativeID:"controllerType=0 controllerNumber=1 scan=23907"	LQIWDTAGQESFR+0.984SITR	LQIWDTAGQESFrSITR	sp|Q8WUD1|RAB2B_HUMAN(pre=K,post=S);sp|P61019|RAB2A_HUMAN(pre=K,post=S);sp|P61019-2|RAB2A_HUMAN(pre=K,post=S);tr|E9PKL7|E9PKL7_HUMAN(pre=K,post=S);tr|A0A3B3ITL1|A0A3B3ITL1_HUMAN(pre=K,post=S)	2	1005.01	1	0	5	0	5	0	0	0	0	0.950382	1	Valid
536	20160312_09_A8.2440.2440.3 File:"20160312_09_A8.raw", NativeID:"controllerType=0 controllerNumber=1 scan=2440"	EHQ+0.984AKQ+0.984N+0.984ER+0.984KELQ+0.984EK	EHqAKqnErKELqEK	sp|P78537|BL1S1_HUMAN(pre=K,post=R);sp|P78537-2|BL1S1_HUMAN(pre=K,post=R);tr|A0A087WSV2|A0A087WSV2_HUMAN(pre=K,post=R);tr|F8W036|F8W036_HUMAN(pre=K,post=R);tr|F8VP73|F8VP73_HUMAN(pre=K,post=R)	3	633.97	1	0	1	0	1	0	0	0	0	0.278664	0	Valid
537	20160312_09_A8.24590.24590.3 File:"20160312_09_A8.raw", NativeID:"controllerType=0 controllerNumber=1 scan=24590"	RGFGFVEFEDPR+0.984DADDAVYELDGK	RGFGFVEFEDPrDADDAVYELDGK	sp|Q13243|SRSF5_HUMAN(pre=K,post=E);sp|Q13243-2|SRSF5_HUMAN(pre=K,post=E);tr|B4DJK0|B4DJK0_HUMAN(pre=K,post=E);tr|B4DUA4|B4DUA4_HUMAN(pre=K,post=E);tr|G3V5K8|G3V5K8_HUMAN(pre=K,post=E)	3	916.753	1	0	1	1	2	0	0	0	0	0.5062	1	Valid
538	20160312_09_A8.24769.24769.2 File:"20160312_09_A8.raw", NativeID:"controllerType=0 controllerNumber=1 scan=24769"	LGPGTR+0.984LSLAR+0.984MPPPLPTR	LGPGTrLSLArMPPPLPTR	sp|P14136|GFAP_HUMAN(pre=R,post=V);sp|P14136-2|GFAP_HUMAN(pre=R,post=V);sp|P14136-3|GFAP_HUMAN(pre=R,post=V);tr|B4DIR1|B4DIR1_HUMAN(pre=R,post=V);tr|K7ELP4|K7ELP4_HUMAN(pre=R,post=V);tr|K7EMP8|K7EMP8_HUMAN(pre=R,post=V);tr|K7EKH9|K7EKH9_HUMAN(pre=R,post=V);tr|A0A1X7SCE1|A0A1X7SCE1_HUMAN(pre=R,post=V);tr|A0A1X7SBR3|A0A1X7SBR3_HUMAN(pre=R,post=V);tr|A0A1W2PR46|A0A1W2PR46_HUMAN(pre=R,post=V);tr|K7EJ…	2	1016.57	2	1	4	1	6	0	0	0	0	0.980705	1	Valid
539	20160312_09_A8.24787.24787.3 File:"20160312_09_A8.raw", NativeID:"controllerType=0 controllerNumber=1 scan=24787"	LGPGTR+0.984LSLARMPPPLPTR	LGPGTrLSLARMPPPLPTR	sp|P14136|GFAP_HUMAN(pre=R,post=V);sp|P14136-2|GFAP_HUMAN(pre=R,post=V);sp|P14136-3|GFAP_HUMAN(pre=R,post=V);tr|B4DIR1|B4DIR1_HUMAN(pre=R,post=V);tr|K7ELP4|K7ELP4_HUMAN(pre=R,post=V);tr|K7EMP8|K7EMP8_HUMAN(pre=R,post=V);tr|K7EKH9|K7EKH9_HUMAN(pre=R,post=V);tr|A0A1X7SCE1|A0A1X7SCE1_HUMAN(pre=R,post=V);tr|A0A1X7SBR3|A0A1X7SBR3_HUMAN(pre=R,post=V);tr|A0A1W2PR46|A0A1W2PR46_HUMAN(pre=R,post=V);tr|K7EJ…	3	677.723	1	0	5	3	8	0	0	0	0	0.997214	1	Valid
540	20160312_09_A8.25614.25614.3 File:"20160312_09_A8.raw", NativeID:"controllerType=0 controllerNumber=1 scan=25614"	DLYANTVLSGGTTMYPGIADR+0.984MQK	DLYANTVLSGGTTMYPGIADrMQK	sp|P63261|ACTG_HUMAN(pre=K,post=E);sp|P60709|ACTB_HUMAN(pre=K,post=E);tr|A0A2R8Y793|A0A2R8Y793_HUMAN(pre=K,post=E)	3	868.421	1	0	3	0	3	0	0	0	0	0.731196	1	Valid
541	20160312_09_A8.26219.26219.2 File:"20160312_09_A8.raw", NativeID:"controllerType=0 controllerNumber=1 scan=26219"	LGGEILDYR+0.984DLAALPK	LGGEILDYrDLAALPK	sp|Q6H8Q1|ABLM2_HUMAN(pre=K,post=S);sp|Q6H8Q1-2|ABLM2_HUMAN(pre=K,post=S);sp|Q6H8Q1-3|ABLM2_HUMAN(pre=K,post=S);sp|Q6H8Q1-4|ABLM2_HUMAN(pre=K,post=S);sp|Q6H8Q1-5|ABLM2_HUMAN(pre=K,post=S);sp|Q6H8Q1-6|ABLM2_HUMAN(pre=K,post=S);sp|Q6H8Q1-7|ABLM2_HUMAN(pre=K,post=S);sp|Q6H8Q1-8|ABLM2_HUMAN(pre=K,post=S);sp|Q6H8Q1-9|ABLM2_HUMAN(pre=K,post=S);tr|D6RAL0|D6RAL0_HUMAN(pre=K,post=S);tr|F5GYR0|F5GYR0_HUMAN…	2	872.978	1	0	1	0	1	0	0	0	0	0.278664	0	Ambiguous
542	20160312_09_A8.27758.27758.3 File:"20160312_09_A8.raw", NativeID:"controllerType=0 controllerNumber=1 scan=27758"	PYQ+0.984GNPTFDPEFIR+0.984SK	PYqGNPTFDPEFIrSK	sp|Q9UFH2|DYH17_HUMAN(pre=K,post=S);tr|K7ELN3|K7ELN3_HUMAN(pre=K,post=S);tr|K7EK91|K7EK91_HUMAN(pre=K,post=S)	3	633.304	1	0	0	0	0	0	0	0	0	0.127083	0	Valid
543	20160312_09_A8.27784.27784.2 File:"20160312_09_A8.raw", NativeID:"controllerType=0 controllerNumber=1 scan=27784"	DVPLTQYQR+0.984DFGLWTTPAGPK	DVPLTQYQrDFGLWTTPAGPK	sp|Q9H9H5|MA6D1_HUMAN(pre=R,post=D);tr|C9JPF8|C9JPF8_HUMAN(pre=R,post=D);tr|H7BZQ6|H7BZQ6_HUMAN(pre=R,post=D)	2	1196.1	1	0	0	0	0	0	0	0	0	0.127083	0	Ambiguous
544	20160312_09_A8.29132.29132.3 File:"20160312_09_A8.raw", NativeID:"controllerType=0 controllerNumber=1 scan=29132"	NR+0.984NGDENYM+15.995EFLEVLTEHLDR	NrNGDENYmEFLEVLTEHLDR	sp|Q9H2X9|S12A5_HUMAN(pre=R,post=V);sp|Q9H2X9-2|S12A5_HUMAN(pre=R,post=V)	3	871.063	1	0	0	0	0	0	0	0	0	0.127083	0	Ambiguous
545	20160312_09_A8.29239.29239.3 File:"20160312_09_A8.raw", NativeID:"controllerType=0 controllerNumber=1 scan=29239"	RGSYSLSVRLSR+0.984PASWDR+0.984IR	RGSYSLSVRLSrPASWDrIR	sp|Q9H6Q3|SLAP2_HUMAN(pre=R,post=H);sp|Q9H6Q3-2|SLAP2_HUMAN(pre=R,post=H);sp|Q9H6Q3-3|SLAP2_HUMAN(pre=R,post=H);sp|Q9H6Q3-4|SLAP2_HUMAN(pre=R,post=H)	3	788.756	2	0	1	3	4	0	0	0	0	0.878318	1	Valid
546	20160312_09_A8.30370.30370.3 File:"20160312_09_A8.raw", NativeID:"controllerType=0 controllerNumber=1 scan=30370"	LLEGEESR+0.984ISLPLPNFSSLNLR	LLEGEESrISLPLPNFSSLNLR	sp|P08670|VIME_HUMAN(pre=K,post=E);tr|B0YJC4|B0YJC4_HUMAN(pre=K,post=G)	3	829.115	1	0	1	1	2	0	0	0	0	0.5062	1	Valid
547	20160312_09_A8.30770.30770.4 File:"20160312_09_A8.raw", NativeID:"controllerType=0 controllerNumber=1 scan=30770"	NR+0.984NGDENYMEFLEVLTEHLDR	NrNGDENYMEFLEVLTEHLDR	sp|Q9H2X9|S12A5_HUMAN(pre=R,post=V);sp|Q9H2X9-2|S12A5_HUMAN(pre=R,post=V)	4	649.551	1	0	0	0	0	0	0	0	0	0.127083	0	Ambiguous
548	20160312_09_A8.3196.3196.3 File:"20160312_09_A8.raw", NativeID:"controllerType=0 controllerNumber=1 scan=3196"	R+0.984EKPEEFQTR	rEKPEEFQTR	sp|P26232|CTNA2_HUMAN(pre=K,post=V);sp|P26232-2|CTNA2_HUMAN(pre=K,post=V);sp|P26232-3|CTNA2_HUMAN(pre=K,post=V);sp|P26232-4|CTNA2_HUMAN(pre=K,post=V);sp|P26232-5|CTNA2_HUMAN(pre=K,post=V);sp|P26232-6|CTNA2_HUMAN(pre=K,post=V);tr|A0A0A0MRI5|A0A0A0MRI5_HUMAN(pre=K,post=V);tr|A0A0A0MTJ6|A0A0A0MTJ6_HUMAN(pre=K,post=V)	3	440.89	1	0	0	0	0	0	0	0	0	0.127083	0	Valid
549	20160312_09_A8.3632.3632.3 File:"20160312_09_A8.raw", NativeID:"controllerType=0 controllerNumber=1 scan=3632"	HEEAPGHR+0.984PTTNPNASK	HEEAPGHrPTTNPNASK	sp|P21291|CSRP1_HUMAN(pre=K,post=F);tr|E9PS42|E9PS42_HUMAN(pre=K,post=F);tr|E9PND2|E9PND2_HUMAN(pre=K,post=F);tr|E9PP21|E9PP21_HUMAN(pre=K,post=F)	3	615.295	1	0	1	6	7	1	1	2	0	0.997991	1	Valid
550	20160312_09_A8.4789.4789.3 File:"20160312_09_A8.raw", NativeID:"controllerType=0 controllerNumber=1 scan=4789"	KEPSTVSR+0.984DEVRR	KEPSTVSrDEVRR	sp|P11137|MTAP2_HUMAN(pre=K,post=K);sp|P11137-3|MTAP2_HUMAN(pre=K,post=K)	3	520.61	1	0	5	1	6	0	0	0	0	0.980705	1	Valid
551	20160312_09_A8.4938.4938.3 File:"20160312_09_A8.raw", NativeID:"controllerType=0 controllerNumber=1 scan=4938"	R+0.984R+0.984N+0.984DLDDPER	rrnDLDDPER	sp|Q15393|SF3B3_HUMAN(pre=R,post=G)	3	430.198	2	0	1	0	1	0	0	0	0	0.278664	0	Valid
552	20160312_09_A8.4982.4982.4 File:"20160312_09_A8.raw", NativeID:"controllerType=0 controllerNumber=1 scan=4982"	RGSGKDSHHPAR+0.984TAHYGSLPQK	RGSGKDSHHPArTAHYGSLPQK	tr|H7BYR8|H7BYR8_HUMAN(pre=K,post=S);sp|P02686|MBP_HUMAN(pre=K,post=S);sp|P02686-5|MBP_HUMAN(pre=K,post=S);sp|P02686-6|MBP_HUMAN(pre=K,post=S);tr|E9PKX9|E9PKX9_HUMAN(pre=K,post=H);tr|J3QL64|J3QL64_HUMAN(pre=K,post=S);tr|E9PJ72|E9PJ72_HUMAN(pre=K,post=S);tr|E9PMR5|E9PMR5_HUMAN(pre=K,post=S);tr|A8MZH3|A8MZH3_HUMAN(pre=K,post=S);tr|H0YF02|H0YF02_HUMAN(pre=K,post=S);tr|E9PNZ1|E9PNZ1_HUMAN(pre=K,post=…	4	597.804	1	0	4	3	7	0	1	1	0	0.996151	1	Valid
553	20160312_09_A8.5016.5016.5 File:"20160312_09_A8.raw", NativeID:"controllerType=0 controllerNumber=1 scan=5016"	RGSGKDSHHPAR+0.984TAHYGSLPQK	RGSGKDSHHPArTAHYGSLPQK	tr|H7BYR8|H7BYR8_HUMAN(pre=K,post=S);sp|P02686|MBP_HUMAN(pre=K,post=S);sp|P02686-5|MBP_HUMAN(pre=K,post=S);sp|P02686-6|MBP_HUMAN(pre=K,post=S);tr|E9PKX9|E9PKX9_HUMAN(pre=K,post=H);tr|J3QL64|J3QL64_HUMAN(pre=K,post=S);tr|E9PJ72|E9PJ72_HUMAN(pre=K,post=S);tr|E9PMR5|E9PMR5_HUMAN(pre=K,post=S);tr|A8MZH3|A8MZH3_HUMAN(pre=K,post=S);tr|H0YF02|H0YF02_HUMAN(pre=K,post=S);tr|E9PNZ1|E9PNZ1_HUMAN(pre=K,post=…	5	478.445	1	0	0	2	2	0	1	1	0	0.663002	1	Valid
554	20160312_09_A8.5052.5052.3 File:"20160312_09_A8.raw", NativeID:"controllerType=0 controllerNumber=1 scan=5052"	RGSGKDSHHPAR+0.984TAHYGSLPQK	RGSGKDSHHPArTAHYGSLPQK	tr|H7BYR8|H7BYR8_HUMAN(pre=K,post=S);sp|P02686|MBP_HUMAN(pre=K,post=S);sp|P02686-5|MBP_HUMAN(pre=K,post=S);sp|P02686-6|MBP_HUMAN(pre=K,post=S);tr|E9PKX9|E9PKX9_HUMAN(pre=K,post=H);tr|J3QL64|J3QL64_HUMAN(pre=K,post=S);tr|E9PJ72|E9PJ72_HUMAN(pre=K,post=S);tr|E9PMR5|E9PMR5_HUMAN(pre=K,post=S);tr|A8MZH3|A8MZH3_HUMAN(pre=K,post=S);tr|H0YF02|H0YF02_HUMAN(pre=K,post=S);tr|E9PNZ1|E9PNZ1_HUMAN(pre=K,post=…	3	796.736	1	1	2	0	3	0	0	0	0	0.731196	1	Valid
555	20160312_09_A8.5608.5608.4 File:"20160312_09_A8.raw", NativeID:"controllerType=0 controllerNumber=1 scan=5608"	SKEEQELHDIHSTR+0.984SK	SKEEQELHDIHSTrSK	sp|P51674|GPM6A_HUMAN(pre=K,post=E);sp|P51674-2|GPM6A_HUMAN(pre=K,post=E);sp|P51674-3|GPM6A_HUMAN(pre=K,post=E)	4	481.99	1	0	4	5	9	0	1	1	0	0.999452	1	Valid
556	20160312_09_A8.5621.5621.3 File:"20160312_09_A8.raw", NativeID:"controllerType=0 controllerNumber=1 scan=5621"	SKEEQELHDIHSTR+0.984SK	SKEEQELHDIHSTrSK	sp|P51674|GPM6A_HUMAN(pre=K,post=E);sp|P51674-2|GPM6A_HUMAN(pre=K,post=E);sp|P51674-3|GPM6A_HUMAN(pre=K,post=E)	3	642.317	1	2	13	5	20	0	1	1	0	1	1	Valid
557	20160312_09_A8.5645.5645.2 File:"20160312_09_A8.raw", NativeID:"controllerType=0 controllerNumber=1 scan=5645"	SKEEQELHDIHSTR+0.984SK	SKEEQELHDIHSTrSK	sp|P51674|GPM6A_HUMAN(pre=K,post=E);sp|P51674-2|GPM6A_HUMAN(pre=K,post=E);sp|P51674-3|GPM6A_HUMAN(pre=K,post=E)	2	962.972	1	2	9	2	13	0	0	0	0	0.999979	1	Valid
558	20160312_09_A8.5988.5988.3 File:"20160312_09_A8.raw", NativeID:"controllerType=0 controllerNumber=1 scan=5988"	EEER+0.984LEQ+0.984EKRER	EEErLEqEKRER	sp|O60841|IF2P_HUMAN(pre=K,post=K);tr|A0A087WUT6|A0A087WUT6_HUMAN(pre=K,post=K)	3	544.933	1	0	1	0	1	0	0	0	0	0.278664	0	Ambiguous
559	20160312_09_A8.6084.6084.4 File:"20160312_09_A8.raw", NativeID:"controllerType=0 controllerNumber=1 scan=6084"	RNSSVESIIIQ+0.984R+0.984TC+57.021R	RNSSVESIIIqrTcR	tr|H0YJ43|H0YJ43_HUMAN(pre=R,post=N)	4	455.988	1	0	0	0	0	0	0	0	0	0.127083	0	Valid
560	20160312_09_A8.6093.6093.2 File:"20160312_09_A8.raw", NativeID:"controllerType=0 controllerNumber=1 scan=6093"	R+0.984VTATQR	rVTATQR	sp|A9Z1Z3|FR1L4_HUMAN(pre=R,post=G);sp|A9Z1Z3-3|FR1L4_HUMAN(pre=R,post=G);sp|A9Z1Z3-4|FR1L4_HUMAN(pre=R,post=G)	2	416.736	1	0	1	0	1	0	0	0	0	0.278664	0	Ambiguous
561	20160312_09_A8.6540.6540.2 File:"20160312_09_A8.raw", NativeID:"controllerType=0 controllerNumber=1 scan=6540"	KM+15.995R+0.984EQ+0.984Q+0.984KEQ+0.984R	KmrEqqKEqR	sp|P21127|CD11B_HUMAN(pre=R,post=E);sp|P21127-2|CD11B_HUMAN(pre=R,post=E);sp|P21127-3|CD11B_HUMAN(pre=R,post=E);sp|P21127-6|CD11B_HUMAN(pre=R,post=E);sp|P21127-8|CD11B_HUMAN(pre=R,post=E);sp|P21127-9|CD11B_HUMAN(pre=R,post=E);sp|Q9UQ88|CD11A_HUMAN(pre=R,post=E);sp|Q9UQ88-2|CD11A_HUMAN(pre=R,post=E);sp|Q9UQ88-3|CD11A_HUMAN(pre=R,post=E);sp|Q9UQ88-4|CD11A_HUMAN(pre=R,post=E);sp|Q9UQ88-9|CD11A_HUMAN…	2	690.825	1	0	0	0	0	1	0	1	0	0.218385	0	Valid
562	20160312_09_A8.7595.7595.5 File:"20160312_09_A8.raw", NativeID:"controllerType=0 controllerNumber=1 scan=7595"	ELR+0.984N+0.984HYLKDIERMYGGK	ELrnHYLKDIERMYGGK	sp|O60488|ACSL4_HUMAN(pre=K,post=-);sp|O60488-2|ACSL4_HUMAN(pre=K,post=-)	5	425.617	1	0	0	0	0	0	0	0	0	0.127083	0	Ambiguous
563	20160312_09_A8.9114.9114.2 File:"20160312_09_A8.raw", NativeID:"controllerType=0 controllerNumber=1 scan=9114"	WLNSGR+0.984GDEASEEGQN+0.984GSSPK	WLNSGrGDEASEEGQnGSSPK	sp|P35611|ADDA_HUMAN(pre=R,post=S);sp|P35611-2|ADDA_HUMAN(pre=R,post=S);sp|P35611-3|ADDA_HUMAN(pre=R,post=S);sp|P35611-4|ADDA_HUMAN(pre=R,post=S);sp|P35611-5|ADDA_HUMAN(pre=R,post=S);sp|P35611-6|ADDA_HUMAN(pre=R,post=S);tr|E7ENY0|E7ENY0_HUMAN(pre=R,post=S);tr|H0Y9H2|H0Y9H2_HUMAN(pre=R,post=S);tr|E7EV99|E7EV99_HUMAN(pre=R,post=S)	2	1103.98	1	0	0	0	0	0	0	0	0	0.127083	0	Ambiguous
564	20160312_09_A8.9429.9429.2 File:"20160312_09_A8.raw", NativeID:"controllerType=0 controllerNumber=1 scan=9429"	FFGGDR+0.984GAPK	FFGGDrGAPK	tr|H7BYR8|H7BYR8_HUMAN(pre=R,post=R);sp|P02686|MBP_HUMAN(pre=R,post=R);sp|P02686-2|MBP_HUMAN(pre=R,post=R);sp|P02686-3|MBP_HUMAN(pre=R,post=R);sp|P02686-4|MBP_HUMAN(pre=R,post=R);sp|P02686-5|MBP_HUMAN(pre=R,post=R);sp|P02686-6|MBP_HUMAN(pre=R,post=R);tr|E9PKX9|E9PKX9_HUMAN(pre=R,post=R);tr|J3QL64|J3QL64_HUMAN(pre=R,post=R);tr|E9PJ72|E9PJ72_HUMAN(pre=R,post=R);tr|J3KT34|J3KT34_HUMAN(pre=R,post=R);…	2	526.762	1	0	1	0	1	0	0	0	0	0.278664	0	Valid
565	20160312_10_A9.10052.10052.2 File:"20160312_10_A9.raw", NativeID:"controllerType=0 controllerNumber=1 scan=10052"	FFGGDR+0.984GAPK	FFGGDrGAPK	tr|H7BYR8|H7BYR8_HUMAN(pre=R,post=R);sp|P02686|MBP_HUMAN(pre=R,post=R);sp|P02686-2|MBP_HUMAN(pre=R,post=R);sp|P02686-3|MBP_HUMAN(pre=R,post=R);sp|P02686-4|MBP_HUMAN(pre=R,post=R);sp|P02686-5|MBP_HUMAN(pre=R,post=R);sp|P02686-6|MBP_HUMAN(pre=R,post=R);tr|E9PKX9|E9PKX9_HUMAN(pre=R,post=R);tr|J3QL64|J3QL64_HUMAN(pre=R,post=R);tr|E9PJ72|E9PJ72_HUMAN(pre=R,post=R);tr|J3KT34|J3KT34_HUMAN(pre=R,post=R);…	2	526.762	1	0	1	0	1	0	0	0	0	0.278664	0	Valid
566	20160312_10_A9.10577.10577.4 File:"20160312_10_A9.raw", NativeID:"controllerType=0 controllerNumber=1 scan=10577"	LEHSSFPEGPGPGSGDEANGPR+0.984GER	LEHSSFPEGPGPGSGDEANGPrGER	sp|O15020|SPTN2_HUMAN(pre=R,post=Q);sp|O15020-2|SPTN2_HUMAN(pre=R,post=Q);tr|A4QPE4|A4QPE4_HUMAN(pre=R,post=Q)	4	635.038	1	1	0	1	2	0	0	0	0	0.5062	1	Valid
567	20160312_10_A9.10663.10663.2 File:"20160312_10_A9.raw", NativeID:"controllerType=0 controllerNumber=1 scan=10663"	VFGDGSR+0.984LSAR	VFGDGSrLSAR	sp|Q16352|AINX_HUMAN(pre=K,post=L)	2	583.302	1	0	8	0	8	0	0	0	0	0.997214	1	Valid
568	20160312_10_A9.1079.1079.3 File:"20160312_10_A9.raw", NativeID:"controllerType=0 controllerNumber=1 scan=1079"	R+0.984VEEEEIK	rVEEEEIK	sp|Q96MC2|DRC1_HUMAN(pre=R,post=R);tr|A0A3B3IT12|A0A3B3IT12_HUMAN(pre=R,post=R);tr|F8WE02|F8WE02_HUMAN(pre=R,post=R)	3	344.846	1	0	0	0	0	0	0	0	0	0.127083	0	Valid
569	20160312_10_A9.12501.12501.3 File:"20160312_10_A9.raw", NativeID:"controllerType=0 controllerNumber=1 scan=12501"	TVETR+0.984DGQVINETSQHHDDLE	TVETrDGQVINETSQHHDDLE	sp|P08670|VIME_HUMAN(pre=K,post=-)	3	808.702	1	0	0	0	0	0	0	0	0	0.127083	0	Ambiguous
570	20160312_10_A9.12539.12539.2 File:"20160312_10_A9.raw", NativeID:"controllerType=0 controllerNumber=1 scan=12539"	TVETR+0.984DGQVINETSQHHDDLE	TVETrDGQVINETSQHHDDLE	sp|P08670|VIME_HUMAN(pre=K,post=-)	2	1212.55	1	2	7	3	12	2	4	6	0	0.999999	1	Valid
571	20160312_10_A9.12657.12657.2 File:"20160312_10_A9.raw", NativeID:"controllerType=0 controllerNumber=1 scan=12657"	LIGTAVPQR+0.984TSPTGPK	LIGTAVPQrTSPTGPK	sp|Q9UPY8|MARE3_HUMAN(pre=K,post=N);tr|C9JB30|C9JB30_HUMAN(pre=K,post=N)	2	812.457	1	0	4	1	5	0	1	1	0	0.973517	1	Valid
572	20160312_10_A9.12740.12740.2 File:"20160312_10_A9.raw", NativeID:"controllerType=0 controllerNumber=1 scan=12740"	APVSR+0.984SPPR	APVSrSPPR	sp|Q5VUA4|ZN318_HUMAN(pre=K,post=E)	2	484.27	1	0	0	0	0	0	1	1	0	0.218385	0	Valid
573	20160312_10_A9.13621.13621.2 File:"20160312_10_A9.raw", NativeID:"controllerType=0 controllerNumber=1 scan=13621"	LSAR+0.984LSGAGGAGGFR	LSArLSGAGGAGGFR	sp|Q16352|AINX_HUMAN(pre=R,post=S)	2	689.366	1	0	2	2	4	3	2	5	0	0.994707	1	Valid
574	20160312_10_A9.14668.14668.2 File:"20160312_10_A9.raw", NativeID:"controllerType=0 controllerNumber=1 scan=14668"	YPTNAPGAFR+0.984VASR	YPTNAPGAFrVASR	sp|Q8N3V7|SYNPO_HUMAN(pre=K,post=S);sp|Q8N3V7-2|SYNPO_HUMAN(pre=K,post=S);sp|Q8N3V7-3|SYNPO_HUMAN(pre=K,post=S)	2	754.387	1	1	7	1	9	0	0	0	0	0.998948	1	Valid
575	20160312_10_A9.14804.14804.2 File:"20160312_10_A9.raw", NativeID:"controllerType=0 controllerNumber=1 scan=14804"	FPGQLNADLR+0.984K	FPGQLNADLrK	sp|Q9BUF5|TBB6_HUMAN(pre=R,post=L);sp|A6NNZ2|TBB8L_HUMAN(pre=R,post=L);sp|Q9BVA1|TBB2B_HUMAN(pre=R,post=L);sp|P07437|TBB5_HUMAN(pre=R,post=L);sp|P04350|TBB4A_HUMAN(pre=R,post=L);sp|Q9H4B7|TBB1_HUMAN(pre=R,post=L);sp|Q13509|TBB3_HUMAN(pre=R,post=L);sp|Q13509-2|TBB3_HUMAN(pre=R,post=L);sp|P68371|TBB4B_HUMAN(pre=R,post=L);sp|Q3ZCM7|TBB8_HUMAN(pre=R,post=L);sp|Q13885|TBB2A_HUMAN(pre=R,post=L);tr|Q5ST…	2	630.341	1	0	4	1	5	1	0	1	0	0.973517	1	Valid
576	20160312_10_A9.14931.14931.2 File:"20160312_10_A9.raw", NativeID:"controllerType=0 controllerNumber=1 scan=14931"	SLYASSPGGVYATR+0.984SSAVR	SLYASSPGGVYATrSSAVR	sp|P08670|VIME_HUMAN(pre=R,post=L);tr|B0YJC4|B0YJC4_HUMAN(pre=R,post=L);tr|A0A1B0GVG8|A0A1B0GVG8_HUMAN(pre=R,post=L);tr|A0A1B0GTT5|A0A1B0GTT5_HUMAN(pre=R,post=L)	2	965.487	1	0	4	0	4	0	0	0	0	0.878318	1	Valid
577	20160312_10_A9.14935.14935.3 File:"20160312_10_A9.raw", NativeID:"controllerType=0 controllerNumber=1 scan=14935"	SLYASSPGGVYATR+0.984SSAVR	SLYASSPGGVYATrSSAVR	sp|P08670|VIME_HUMAN(pre=R,post=L);tr|B0YJC4|B0YJC4_HUMAN(pre=R,post=L);tr|A0A1B0GVG8|A0A1B0GVG8_HUMAN(pre=R,post=L);tr|A0A1B0GTT5|A0A1B0GTT5_HUMAN(pre=R,post=L)	3	643.994	1	0	5	0	5	0	0	0	0	0.950382	1	Valid
578	20160312_10_A9.14966.14966.2 File:"20160312_10_A9.raw", NativeID:"controllerType=0 controllerNumber=1 scan=14966"	FPGQLNADLR+0.984K	FPGQLNADLrK	sp|Q9BUF5|TBB6_HUMAN(pre=R,post=L);sp|A6NNZ2|TBB8L_HUMAN(pre=R,post=L);sp|Q9BVA1|TBB2B_HUMAN(pre=R,post=L);sp|P07437|TBB5_HUMAN(pre=R,post=L);sp|P04350|TBB4A_HUMAN(pre=R,post=L);sp|Q9H4B7|TBB1_HUMAN(pre=R,post=L);sp|Q13509|TBB3_HUMAN(pre=R,post=L);sp|Q13509-2|TBB3_HUMAN(pre=R,post=L);sp|P68371|TBB4B_HUMAN(pre=R,post=L);sp|Q3ZCM7|TBB8_HUMAN(pre=R,post=L);sp|Q13885|TBB2A_HUMAN(pre=R,post=L);tr|Q5ST…	2	630.341	1	0	4	1	5	1	0	1	0	0.973517	1	Valid
579	20160312_10_A9.15269.15269.2 File:"20160312_10_A9.raw", NativeID:"controllerType=0 controllerNumber=1 scan=15269"	R+0.984LGPGTR+0.984LSLAR	rLGPGTrLSLAR	sp|P14136|GFAP_HUMAN(pre=R,post=M);sp|P14136-2|GFAP_HUMAN(pre=R,post=M);sp|P14136-3|GFAP_HUMAN(pre=R,post=M);tr|B4DIR1|B4DIR1_HUMAN(pre=R,post=M);tr|K7ELP4|K7ELP4_HUMAN(pre=R,post=M);tr|K7EMP8|K7EMP8_HUMAN(pre=R,post=M);tr|K7EKH9|K7EKH9_HUMAN(pre=R,post=M);tr|A0A1X7SCE1|A0A1X7SCE1_HUMAN(pre=R,post=M);tr|A0A1X7SBR3|A0A1X7SBR3_HUMAN(pre=R,post=M);tr|A0A1W2PR46|A0A1W2PR46_HUMAN(pre=R,post=M);tr|K7EJ…	2	649.881	2	3	20	9	32	2	1	3	0	1	1	Valid
580	20160312_10_A9.17159.17159.2 File:"20160312_10_A9.raw", NativeID:"controllerType=0 controllerNumber=1 scan=17159"	TAWR+0.984LDC+57.021AQLK	TAWrLDcAQLK	tr|K7ERC4|K7ERC4_HUMAN(pre=K,post=E);tr|C9K0L8|C9K0L8_HUMAN(pre=K,post=E);tr|K7ERZ0|K7ERZ0_HUMAN(pre=K,post=E);sp|P09543|CN37_HUMAN(pre=K,post=E);sp|P09543-2|CN37_HUMAN(pre=K,post=E)	2	681.846	1	0	1	1	2	2	0	2	0	0.790609	1	Valid
581	20160312_10_A9.19546.19546.2 File:"20160312_10_A9.raw", NativeID:"controllerType=0 controllerNumber=1 scan=19546"	SYVSSGEMMVGGLAPGR+0.984R	SYVSSGEMMVGGLAPGrR	sp|P14136|GFAP_HUMAN(pre=R,post=L);sp|P14136-2|GFAP_HUMAN(pre=R,post=L);sp|P14136-3|GFAP_HUMAN(pre=R,post=L);tr|B4DIR1|B4DIR1_HUMAN(pre=R,post=L);tr|K7ELP4|K7ELP4_HUMAN(pre=R,post=L);tr|K7EMP8|K7EMP8_HUMAN(pre=R,post=L);tr|K7EKH9|K7EKH9_HUMAN(pre=R,post=L);tr|A0A1X7SCE1|A0A1X7SCE1_HUMAN(pre=R,post=L);tr|A0A1X7SBR3|A0A1X7SBR3_HUMAN(pre=R,post=L);tr|A0A1W2PR46|A0A1W2PR46_HUMAN(pre=R,post=L);tr|K7EJ…	2	927.946	1	0	7	0	7	0	0	0	0	0.99264	1	Valid
582	20160312_10_A9.19698.19698.2 File:"20160312_10_A9.raw", NativeID:"controllerType=0 controllerNumber=1 scan=19698"	FSWGAEGQR+0.984PGFGYGGR	FSWGAEGQrPGFGYGGR	sp|P02686|MBP_HUMAN(pre=R,post=A);sp|P02686-3|MBP_HUMAN(pre=R,post=A);sp|P02686-5|MBP_HUMAN(pre=R,post=A);tr|C9J6H1|C9J6H1_HUMAN(pre=R,post=A);tr|J3QL64|J3QL64_HUMAN(pre=R,post=A);tr|E9PJ72|E9PJ72_HUMAN(pre=R,post=A);tr|A8MZH3|A8MZH3_HUMAN(pre=R,post=A)	2	915.422	1	0	3	3	6	0	0	0	0	0.980705	1	Valid
583	20160312_10_A9.20388.20388.2 File:"20160312_10_A9.raw", NativeID:"controllerType=0 controllerNumber=1 scan=20388"	TTMR+0.984DLSQMLK	TTMrDLSQMLK	sp|P61764|STXB1_HUMAN(pre=K,post=K);sp|P61764-2|STXB1_HUMAN(pre=K,post=K);tr|A0A0D9SG72|A0A0D9SG72_HUMAN(pre=K,post=K);tr|A0A1B0GWF2|A0A1B0GWF2_HUMAN(pre=K,post=K);tr|A0A1B0GW76|A0A1B0GW76_HUMAN(pre=K,post=K);tr|A0A1B0GTP9|A0A1B0GTP9_HUMAN(pre=K,post=K);tr|A0A1B0GVQ5|A0A1B0GVQ5_HUMAN(pre=K,post=K);tr|A0A2R8Y5D4|A0A2R8Y5D4_HUMAN(pre=K,post=K)	2	662.834	1	0	2	1	3	2	0	2	0	0.909249	1	Valid
584	20160312_10_A9.20701.20701.3 File:"20160312_10_A9.raw", NativeID:"controllerType=0 controllerNumber=1 scan=20701"	RKYVVGELIWNFADFMTEQ+0.984SPTR+0.984VLGNKK	RKYVVGELIWNFADFMTEqSPTrVLGNKK	sp|P08236|BGLR_HUMAN(pre=R,post=G);sp|P08236-2|BGLR_HUMAN(pre=R,post=G);sp|P08236-3|BGLR_HUMAN(pre=R,post=G)	3	1143.59	1	0	1	1	2	0	0	0	0	0.5062	1	Ambiguous
585	20160312_10_A9.21429.21429.3 File:"20160312_10_A9.raw", NativeID:"controllerType=0 controllerNumber=1 scan=21429"	VLTPELYAELR+0.984AK	VLTPELYAELrAK	sp|P12277|KCRB_HUMAN(pre=K,post=S);tr|G3V4N7|G3V4N7_HUMAN(pre=K,post=S);tr|G3V461|G3V461_HUMAN(pre=K,post=S)	3	501.953	1	0	7	4	11	2	1	3	0	0.999979	1	Valid
586	20160312_10_A9.21484.21484.2 File:"20160312_10_A9.raw", NativeID:"controllerType=0 controllerNumber=1 scan=21484"	VLTPELYAELR+0.984AK	VLTPELYAELrAK	sp|P12277|KCRB_HUMAN(pre=K,post=S);tr|G3V4N7|G3V4N7_HUMAN(pre=K,post=S);tr|G3V461|G3V461_HUMAN(pre=K,post=S)	2	752.425	1	0	16	11	27	2	1	3	0	1	1	Valid
587	20160312_10_A9.21648.21648.2 File:"20160312_10_A9.raw", NativeID:"controllerType=0 controllerNumber=1 scan=21648"	EIIDPVLDR+0.984IR	EIIDPVLDrIR	sp|P68366|TBA4A_HUMAN(pre=K,post=K);sp|P68366-2|TBA4A_HUMAN(pre=K,post=K);tr|C9JQ00|C9JQ00_HUMAN(pre=K,post=K);tr|C9JEV8|C9JEV8_HUMAN(pre=K,post=K);tr|C9JJQ8|C9JJQ8_HUMAN(pre=K,post=K)	2	670.383	1	0	8	1	9	0	0	0	0	0.998948	1	Valid
588	20160312_10_A9.21932.21932.2 File:"20160312_10_A9.raw", NativeID:"controllerType=0 controllerNumber=1 scan=21932"	FADLTDAAAR+0.984NAELLR	FADLTDAAArNAELLR	sp|P14136|GFAP_HUMAN(pre=K,post=Q);sp|P14136-2|GFAP_HUMAN(pre=K,post=Q);sp|P14136-3|GFAP_HUMAN(pre=K,post=Q);tr|K7EMP8|K7EMP8_HUMAN(pre=K,post=Q);tr|K7EKH9|K7EKH9_HUMAN(pre=K,post=Q);tr|A0A1X7SCE1|A0A1X7SCE1_HUMAN(pre=K,post=Q);tr|A0A1W2PRT3|A0A1W2PRT3_HUMAN(pre=K,post=Q);tr|A0A1X7SBR3|A0A1X7SBR3_HUMAN(pre=K,post=Q);tr|A0A1W2PR46|A0A1W2PR46_HUMAN(pre=K,post=Q);tr|K7EKD1|K7EKD1_HUMAN(pre=K,post=Q)	2	874.453	1	0	6	0	6	0	0	0	0	0.980705	1	Valid
589	20160312_10_A9.22116.22116.2 File:"20160312_10_A9.raw", NativeID:"controllerType=0 controllerNumber=1 scan=22116"	GLSLSR+0.984FSWGAEGQR	GLSLSrFSWGAEGQR	sp|P02686|MBP_HUMAN(pre=R,post=P);sp|P02686-3|MBP_HUMAN(pre=R,post=P);sp|P02686-5|MBP_HUMAN(pre=R,post=P);tr|C9J6H1|C9J6H1_HUMAN(pre=R,post=P);tr|J3QL64|J3QL64_HUMAN(pre=R,post=P);tr|E9PJ72|E9PJ72_HUMAN(pre=R,post=P);tr|A8MZH3|A8MZH3_HUMAN(pre=R,post=P)	2	826.414	1	0	2	1	3	1	0	1	0	0.839242	1	Valid
590	20160312_10_A9.22779.22779.3 File:"20160312_10_A9.raw", NativeID:"controllerType=0 controllerNumber=1 scan=22779"	ALSHSSSFRR+0.984HM+15.995VM+15.995HTGDGPNK	ALSHSSSFRrHmVmHTGDGPNK	sp|Q8TA94|ZN563_HUMAN(pre=K,post=C)	3	829.054	1	0	0	0	0	0	0	0	0	0.127083	0	Ambiguous
591	20160312_10_A9.22839.22839.2 File:"20160312_10_A9.raw", NativeID:"controllerType=0 controllerNumber=1 scan=22839"	QLR+0.984LINQPLPDLK	QLrLINQPLPDLK	sp|P11137|MTAP2_HUMAN(pre=K,post=N);sp|P11137-2|MTAP2_HUMAN(pre=K,post=N);sp|P11137-3|MTAP2_HUMAN(pre=K,post=N);sp|P11137-4|MTAP2_HUMAN(pre=K,post=N)	2	774.96	1	2	6	1	9	3	1	4	0	0.999922	1	Valid
592	20160312_10_A9.23939.23939.3 File:"20160312_10_A9.raw", NativeID:"controllerType=0 controllerNumber=1 scan=23939"	AGFAGDDAPR+0.984AVFPSIVGR	AGFAGDDAPrAVFPSIVGR	sp|Q6S8J3|POTEE_HUMAN(pre=K,post=P);sp|A5A3E0|POTEF_HUMAN(pre=K,post=P);sp|P0CG38|POTEI_HUMAN(pre=K,post=P);tr|I3L4N8|I3L4N8_HUMAN(pre=K,post=P);sp|P63267|ACTH_HUMAN(pre=K,post=P);sp|P63267-2|ACTH_HUMAN(pre=K,post=P);sp|P63261|ACTG_HUMAN(pre=K,post=P);sp|P62736|ACTA_HUMAN(pre=K,post=P);sp|P68133|ACTS_HUMAN(pre=K,post=P);sp|P60709|ACTB_HUMAN(pre=K,post=P);sp|P68032|ACTC_HUMAN(pre=K,post=P);tr|I3L3…	3	635.327	1	0	0	1	1	2	1	3	0	0.731962	1	Valid
593	20160312_10_A9.23957.23957.2 File:"20160312_10_A9.raw", NativeID:"controllerType=0 controllerNumber=1 scan=23957"	AGFAGDDAPR+0.984AVFPSIVGR	AGFAGDDAPrAVFPSIVGR	sp|Q6S8J3|POTEE_HUMAN(pre=K,post=P);sp|A5A3E0|POTEF_HUMAN(pre=K,post=P);sp|P0CG38|POTEI_HUMAN(pre=K,post=P);tr|I3L4N8|I3L4N8_HUMAN(pre=K,post=P);sp|P63267|ACTH_HUMAN(pre=K,post=P);sp|P63267-2|ACTH_HUMAN(pre=K,post=P);sp|P63261|ACTG_HUMAN(pre=K,post=P);sp|P62736|ACTA_HUMAN(pre=K,post=P);sp|P68133|ACTS_HUMAN(pre=K,post=P);sp|P60709|ACTB_HUMAN(pre=K,post=P);sp|P68032|ACTC_HUMAN(pre=K,post=P);tr|I3L3…	2	952.487	1	1	3	1	5	2	1	3	0	0.992668	1	Valid
594	20160312_10_A9.24580.24580.2 File:"20160312_10_A9.raw", NativeID:"controllerType=0 controllerNumber=1 scan=24580"	ITIPVQTFSNLQIR+0.984GGK	ITIPVQTFSNLQIrGGK	sp|P14136-3|GFAP_HUMAN(pre=R,post=S);tr|K7EPT8|K7EPT8_HUMAN(pre=R,post=S);tr|A0A1W2PS58|A0A1W2PS58_HUMAN(pre=R,post=S);tr|A0A1X7SBR3|A0A1X7SBR3_HUMAN(pre=R,post=S)	2	937.031	1	0	1	0	1	0	0	0	0	0.278664	0	Valid
595	20160312_10_A9.25815.25815.4 File:"20160312_10_A9.raw", NativeID:"controllerType=0 controllerNumber=1 scan=25815"	LHFFMPGFAPLTSR+0.984GSQQYR	LHFFMPGFAPLTSrGSQQYR	sp|Q9BUF5|TBB6_HUMAN(pre=R,post=A);sp|A6NNZ2|TBB8L_HUMAN(pre=R,post=A);sp|Q9BVA1|TBB2B_HUMAN(pre=R,post=A);sp|P07437|TBB5_HUMAN(pre=R,post=A);sp|P04350|TBB4A_HUMAN(pre=R,post=A);sp|P68371|TBB4B_HUMAN(pre=R,post=A);sp|Q3ZCM7|TBB8_HUMAN(pre=R,post=A);sp|Q13885|TBB2A_HUMAN(pre=R,post=A);tr|Q5ST81|Q5ST81_HUMAN(pre=R,post=A);tr|Q5SQY0|Q5SQY0_HUMAN(pre=R,post=A);tr|Q5JP53|Q5JP53_HUMAN(pre=R,post=A);tr|…	4	586.045	1	0	1	0	1	0	2	2	0	0.587272	1	Valid
596	20160312_10_A9.26475.26475.2 File:"20160312_10_A9.raw", NativeID:"controllerType=0 controllerNumber=1 scan=26475"	LLPLVSDEVFIR+0.984DVAK	LLPLVSDEVFIrDVAK	sp|P11216|PYGB_HUMAN(pre=K,post=V)	2	908.017	1	0	0	4	4	0	2	2	0	0.96375	1	Valid
597	20160312_10_A9.26768.26768.3 File:"20160312_10_A9.raw", NativeID:"controllerType=0 controllerNumber=1 scan=26768"	LLGNVLVC+57.021VLAR+0.984N+0.984FGK	LLGNVLVcVLArnFGK	sp|P02042|HBD_HUMAN(pre=R,post=E)	3	592.335	1	0	0	0	0	0	1	1	0	0.218385	0	Valid
598	20160312_10_A9.26919.26919.3 File:"20160312_10_A9.raw", NativeID:"controllerType=0 controllerNumber=1 scan=26919"	LLGNVLVC+57.021VLAR+0.984N+0.984FGK	LLGNVLVcVLArnFGK	sp|P02042|HBD_HUMAN(pre=R,post=E)	3	592.335	1	0	0	0	0	0	0	0	0	0.127083	0	Valid
599	20160312_10_A9.26925.26925.3 File:"20160312_10_A9.raw", NativeID:"controllerType=0 controllerNumber=1 scan=26925"	VGELGMAPFVHAR+0.984AGKTK	VGELGMAPFVHArAGKTK	tr|A6NMH8|A6NMH8_HUMAN(pre=K,post=A)	3	624.006	1	0	0	1	1	0	0	0	0	0.278664	0	Valid
600	20160312_10_A9.27068.27068.3 File:"20160312_10_A9.raw", NativeID:"controllerType=0 controllerNumber=1 scan=27068"	LLGNVLVC+57.021VLAR+0.984N+0.984FGK	LLGNVLVcVLArnFGK	sp|P02042|HBD_HUMAN(pre=R,post=E)	3	592.335	1	0	0	1	1	0	1	1	0	0.425753	0	Valid
601	20160312_10_A9.27371.27371.3 File:"20160312_10_A9.raw", NativeID:"controllerType=0 controllerNumber=1 scan=27371"	SGPFGQIFR+0.984PDNFVFGQSGAGNNWAK	SGPFGQIFrPDNFVFGQSGAGNNWAK	sp|Q9BVA1|TBB2B_HUMAN(pre=R,post=G);sp|P07437|TBB5_HUMAN(pre=R,post=G);sp|P04350|TBB4A_HUMAN(pre=R,post=G);sp|P68371|TBB4B_HUMAN(pre=R,post=G);sp|Q13885|TBB2A_HUMAN(pre=R,post=G);tr|Q5ST81|Q5ST81_HUMAN(pre=R,post=G);tr|Q5JP53|Q5JP53_HUMAN(pre=R,post=G);tr|M0R278|M0R278_HUMAN(pre=R,post=G);tr|M0QY85|M0QY85_HUMAN(pre=R,post=G);tr|M0R1I1|M0R1I1_HUMAN(pre=R,post=G);tr|M0QZL7|M0QZL7_HUMAN(pre=R,post=G)	3	933.781	1	0	0	0	0	0	0	0	0	0.127083	0	Valid
602	20160312_10_A9.27669.27669.3 File:"20160312_10_A9.raw", NativeID:"controllerType=0 controllerNumber=1 scan=27669"	SGPFGQIFR+0.984PDNFVFGQSGAGNNWAK	SGPFGQIFrPDNFVFGQSGAGNNWAK	sp|Q9BVA1|TBB2B_HUMAN(pre=R,post=G);sp|P07437|TBB5_HUMAN(pre=R,post=G);sp|P04350|TBB4A_HUMAN(pre=R,post=G);sp|P68371|TBB4B_HUMAN(pre=R,post=G);sp|Q13885|TBB2A_HUMAN(pre=R,post=G);tr|Q5ST81|Q5ST81_HUMAN(pre=R,post=G);tr|Q5JP53|Q5JP53_HUMAN(pre=R,post=G);tr|M0R278|M0R278_HUMAN(pre=R,post=G);tr|M0QY85|M0QY85_HUMAN(pre=R,post=G);tr|M0R1I1|M0R1I1_HUMAN(pre=R,post=G);tr|M0QZL7|M0QZL7_HUMAN(pre=R,post=G)	3	933.781	1	0	0	0	0	0	0	0	0	0.127083	0	Valid
603	20160312_10_A9.27858.27858.3 File:"20160312_10_A9.raw", NativeID:"controllerType=0 controllerNumber=1 scan=27858"	AVFVDLEPTVIDEVR+0.984TGTYR	AVFVDLEPTVIDEVrTGTYR	sp|P68363|TBA1B_HUMAN(pre=R,post=Q);sp|P68363-2|TBA1B_HUMAN(pre=R,post=Q);sp|Q9BQE3|TBA1C_HUMAN(pre=R,post=Q);sp|Q71U36|TBA1A_HUMAN(pre=R,post=Q);sp|Q71U36-2|TBA1A_HUMAN(pre=R,post=Q);tr|F8VVB9|F8VVB9_HUMAN(pre=R,post=Q);tr|F5H5D3|F5H5D3_HUMAN(pre=R,post=Q);tr|F8VQQ4|F8VQQ4_HUMAN(pre=R,post=Q);tr|F8VX09|F8VX09_HUMAN(pre=R,post=Q);tr|F8VRK0|F8VRK0_HUMAN(pre=R,post=-);tr|F8VRZ4|F8VRZ4_HUMAN(pre=R,p…	3	761.062	1	0	5	1	6	0	1	1	0	0.989852	1	Valid
604	20160312_10_A9.27974.27974.2 File:"20160312_10_A9.raw", NativeID:"controllerType=0 controllerNumber=1 scan=27974"	AVFVDLEPTVIDEVR+0.984TGTYR	AVFVDLEPTVIDEVrTGTYR	sp|P68363|TBA1B_HUMAN(pre=R,post=Q);sp|P68363-2|TBA1B_HUMAN(pre=R,post=Q);sp|Q9BQE3|TBA1C_HUMAN(pre=R,post=Q);sp|Q71U36|TBA1A_HUMAN(pre=R,post=Q);sp|Q71U36-2|TBA1A_HUMAN(pre=R,post=Q);tr|F8VVB9|F8VVB9_HUMAN(pre=R,post=Q);tr|F5H5D3|F5H5D3_HUMAN(pre=R,post=Q);tr|F8VQQ4|F8VQQ4_HUMAN(pre=R,post=Q);tr|F8VX09|F8VX09_HUMAN(pre=R,post=Q);tr|F8VRK0|F8VRK0_HUMAN(pre=R,post=-);tr|F8VRZ4|F8VRZ4_HUMAN(pre=R,p…	2	1141.09	1	0	2	1	3	0	1	1	0	0.839242	1	Valid
605	20160312_10_A9.28014.28014.3 File:"20160312_10_A9.raw", NativeID:"controllerType=0 controllerNumber=1 scan=28014"	AVFVDLEPTVIDEVR+0.984TGTYR	AVFVDLEPTVIDEVrTGTYR	sp|P68363|TBA1B_HUMAN(pre=R,post=Q);sp|P68363-2|TBA1B_HUMAN(pre=R,post=Q);sp|Q9BQE3|TBA1C_HUMAN(pre=R,post=Q);sp|Q71U36|TBA1A_HUMAN(pre=R,post=Q);sp|Q71U36-2|TBA1A_HUMAN(pre=R,post=Q);tr|F8VVB9|F8VVB9_HUMAN(pre=R,post=Q);tr|F5H5D3|F5H5D3_HUMAN(pre=R,post=Q);tr|F8VQQ4|F8VQQ4_HUMAN(pre=R,post=Q);tr|F8VX09|F8VX09_HUMAN(pre=R,post=Q);tr|F8VRK0|F8VRK0_HUMAN(pre=R,post=-);tr|F8VRZ4|F8VRZ4_HUMAN(pre=R,p…	3	761.062	1	0	2	0	2	0	0	0	0	0.5062	1	Valid
606	20160312_10_A9.28031.28031.3 File:"20160312_10_A9.raw", NativeID:"controllerType=0 controllerNumber=1 scan=28031"	LLEGEENR+0.984ITIPVQTFSNLQIR	LLEGEENrITIPVQTFSNLQIR	sp|P14136|GFAP_HUMAN(pre=K,post=E);sp|P14136-2|GFAP_HUMAN(pre=K,post=G);sp|P14136-3|GFAP_HUMAN(pre=K,post=G);tr|K7EPT8|K7EPT8_HUMAN(pre=K,post=G);tr|K7EMP8|K7EMP8_HUMAN(pre=K,post=E);tr|A0A1W2PS58|A0A1W2PS58_HUMAN(pre=K,post=G);tr|A0A1W2PPA3|A0A1W2PPA3_HUMAN(pre=K,post=E);tr|A0A1W2PRT3|A0A1W2PRT3_HUMAN(pre=K,post=E);tr|K7EPI4|K7EPI4_HUMAN(pre=K,post=E);tr|A0A1X7SBR3|A0A1X7SBR3_HUMAN(pre=K,post=G)…	3	857.798	1	0	4	1	5	0	0	0	0	0.950382	1	Valid
607	20160312_10_A9.28048.28048.2 File:"20160312_10_A9.raw", NativeID:"controllerType=0 controllerNumber=1 scan=28048"	LLEGEENR+0.984ITIPVQTFSNLQIR	LLEGEENrITIPVQTFSNLQIR	sp|P14136|GFAP_HUMAN(pre=K,post=E);sp|P14136-2|GFAP_HUMAN(pre=K,post=G);sp|P14136-3|GFAP_HUMAN(pre=K,post=G);tr|K7EPT8|K7EPT8_HUMAN(pre=K,post=G);tr|K7EMP8|K7EMP8_HUMAN(pre=K,post=E);tr|A0A1W2PS58|A0A1W2PS58_HUMAN(pre=K,post=G);tr|A0A1W2PPA3|A0A1W2PPA3_HUMAN(pre=K,post=E);tr|A0A1W2PRT3|A0A1W2PRT3_HUMAN(pre=K,post=E);tr|K7EPI4|K7EPI4_HUMAN(pre=K,post=E);tr|A0A1X7SBR3|A0A1X7SBR3_HUMAN(pre=K,post=G)…	2	1286.19	1	0	2	1	3	0	0	0	0	0.731196	1	Valid
608	20160312_10_A9.28144.28144.3 File:"20160312_10_A9.raw", NativeID:"controllerType=0 controllerNumber=1 scan=28144"	R+0.984PLGNFTAPPTYTETLSTAPLASWVR	rPLGNFTAPPTYTETLSTAPLASWVR	sp|Q8N3V7|SYNPO_HUMAN(pre=R,post=S);sp|Q8N3V7-2|SYNPO_HUMAN(pre=R,post=S);sp|Q8N3V7-3|SYNPO_HUMAN(pre=R,post=S)	3	949.828	1	0	0	0	0	0	0	0	0	0.127083	0	Ambiguous
609	20160312_10_A9.2817.2817.2 File:"20160312_10_A9.raw", NativeID:"controllerType=0 controllerNumber=1 scan=2817"	KLR+0.984R+0.984R+0.984VLQNLK	KLrrrVLQNLK	sp|Q86U38|NOP9_HUMAN(pre=R,post=G);tr|A0A3B3ISH6|A0A3B3ISH6_HUMAN(pre=R,post=G)	2	713.947	3	0	0	0	0	0	0	0	0	0.127083	0	Valid
610	20160312_10_A9.28783.28783.2 File:"20160312_10_A9.raw", NativeID:"controllerType=0 controllerNumber=1 scan=28783"	PVSPLLLASGMAR+0.984DWPDAR	PVSPLLLASGMArDWPDAR	sp|P06732|KCRM_HUMAN(pre=K,post=G);sp|P12277|KCRB_HUMAN(pre=K,post=G);tr|H0YJG0|H0YJG0_HUMAN(pre=K,post=G);tr|G3V4N7|G3V4N7_HUMAN(pre=K,post=G)	2	1027.03	1	0	4	0	4	0	0	0	0	0.878318	1	Valid
611	20160312_10_A9.28797.28797.3 File:"20160312_10_A9.raw", NativeID:"controllerType=0 controllerNumber=1 scan=28797"	PVSPLLLASGMAR+0.984DWPDAR	PVSPLLLASGMArDWPDAR	sp|P06732|KCRM_HUMAN(pre=K,post=G);sp|P12277|KCRB_HUMAN(pre=K,post=G);tr|H0YJG0|H0YJG0_HUMAN(pre=K,post=G);tr|G3V4N7|G3V4N7_HUMAN(pre=K,post=G)	3	685.023	1	0	4	1	5	1	0	1	0	0.973517	1	Valid
612	20160312_10_A9.28939.28939.3 File:"20160312_10_A9.raw", NativeID:"controllerType=0 controllerNumber=1 scan=28939"	AALVKSR+0.984DM+15.995HWSLLAQR+0.984GQ+0.984R	AALVKSrDmHWSLLAQrGqR	sp|Q14689|DIP2A_HUMAN(pre=R,post=D);sp|Q14689-2|DIP2A_HUMAN(pre=R,post=D);sp|Q14689-3|DIP2A_HUMAN(pre=R,post=D);sp|Q14689-4|DIP2A_HUMAN(pre=R,post=D);sp|Q14689-5|DIP2A_HUMAN(pre=R,post=D);sp|Q14689-6|DIP2A_HUMAN(pre=R,post=D)	3	781.407	2	0	1	0	1	0	0	0	0	0.278664	0	Valid
613	20160312_10_A9.29479.29479.3 File:"20160312_10_A9.raw", NativeID:"controllerType=0 controllerNumber=1 scan=29479"	AVFVDLEPTVIDEIR+0.984NGPYR	AVFVDLEPTVIDEIrNGPYR	sp|P68366|TBA4A_HUMAN(pre=R,post=Q);sp|P68366-2|TBA4A_HUMAN(pre=R,post=Q);tr|C9JDL2|C9JDL2_HUMAN(pre=R,post=Q);tr|C9JQ00|C9JQ00_HUMAN(pre=R,post=Q);tr|C9JEV8|C9JEV8_HUMAN(pre=R,post=Q);tr|C9JJQ8|C9JJQ8_HUMAN(pre=R,post=Q)	3	768.734	1	0	4	0	4	0	0	0	0	0.878318	1	Valid
614	20160312_10_A9.30468.30468.3 File:"20160312_10_A9.raw", NativeID:"controllerType=0 controllerNumber=1 scan=30468"	AGTLSITEFADMLSGNAGGFR+0.984SR	AGTLSITEFADMLSGNAGGFrSR	sp|Q15149|PLEC_HUMAN(pre=R,post=S);sp|Q15149-2|PLEC_HUMAN(pre=R,post=S);sp|Q15149-3|PLEC_HUMAN(pre=R,post=S);sp|Q15149-4|PLEC_HUMAN(pre=R,post=S);sp|Q15149-5|PLEC_HUMAN(pre=R,post=S);sp|Q15149-6|PLEC_HUMAN(pre=R,post=S);sp|Q15149-7|PLEC_HUMAN(pre=R,post=S);sp|Q15149-8|PLEC_HUMAN(pre=R,post=S);sp|Q15149-9|PLEC_HUMAN(pre=R,post=S);tr|H0YDN1|H0YDN1_HUMAN(pre=R,post=S)	3	787.05	1	0	4	0	4	0	0	0	0	0.878318	1	Valid
615	20160312_10_A9.31547.31547.3 File:"20160312_10_A9.raw", NativeID:"controllerType=0 controllerNumber=1 scan=31547"	GAAAMIPGPQTVATEIR+0.984SLSPIIGK	GAAAMIPGPQTVATEIrSLSPIIGK	tr|A0A0C4DH22|A0A0C4DH22_HUMAN(pre=K,post=D);sp|Q9H4G0|E41L1_HUMAN(pre=K,post=D);sp|Q9H4G0-2|E41L1_HUMAN(pre=K,post=D);sp|Q9H4G0-3|E41L1_HUMAN(pre=K,post=D);sp|Q9H4G0-4|E41L1_HUMAN(pre=K,post=D);tr|X6RC15|X6RC15_HUMAN(pre=K,post=D);tr|H7C2K6|H7C2K6_HUMAN(pre=K,post=D);tr|A0A1B0GTW6|A0A1B0GTW6_HUMAN(pre=K,post=D)	3	827.125	1	0	1	2	3	0	1	1	0	0.839242	1	Valid
616	20160312_10_A9.4207.4207.4 File:"20160312_10_A9.raw", NativeID:"controllerType=0 controllerNumber=1 scan=4207"	C+57.021HVDENER+0.984QNGAAN+0.984HVEK	cHVDENErQNGAAnHVEK	sp|Q9UI40|NCKX2_HUMAN(pre=K,post=I);sp|Q9UI40-2|NCKX2_HUMAN(pre=K,post=I)	4	527.982	1	0	0	1	1	0	0	0	0	0.278664	0	Valid
617	20160312_10_A9.4266.4266.4 File:"20160312_10_A9.raw", NativeID:"controllerType=0 controllerNumber=1 scan=4266"	RGSGKDSHHPAR+0.984TAHYGSLPQK	RGSGKDSHHPArTAHYGSLPQK	tr|H7BYR8|H7BYR8_HUMAN(pre=K,post=S);sp|P02686|MBP_HUMAN(pre=K,post=S);sp|P02686-5|MBP_HUMAN(pre=K,post=S);sp|P02686-6|MBP_HUMAN(pre=K,post=S);tr|E9PKX9|E9PKX9_HUMAN(pre=K,post=H);tr|J3QL64|J3QL64_HUMAN(pre=K,post=S);tr|E9PJ72|E9PJ72_HUMAN(pre=K,post=S);tr|E9PMR5|E9PMR5_HUMAN(pre=K,post=S);tr|A8MZH3|A8MZH3_HUMAN(pre=K,post=S);tr|H0YF02|H0YF02_HUMAN(pre=K,post=S);tr|E9PNZ1|E9PNZ1_HUMAN(pre=K,post=…	4	597.804	1	1	14	3	18	0	1	1	0	1	1	Valid
618	20160312_10_A9.4319.4319.3 File:"20160312_10_A9.raw", NativeID:"controllerType=0 controllerNumber=1 scan=4319"	RGSGKDSHHPAR+0.984TAHYGSLPQK	RGSGKDSHHPArTAHYGSLPQK	tr|H7BYR8|H7BYR8_HUMAN(pre=K,post=S);sp|P02686|MBP_HUMAN(pre=K,post=S);sp|P02686-5|MBP_HUMAN(pre=K,post=S);sp|P02686-6|MBP_HUMAN(pre=K,post=S);tr|E9PKX9|E9PKX9_HUMAN(pre=K,post=H);tr|J3QL64|J3QL64_HUMAN(pre=K,post=S);tr|E9PJ72|E9PJ72_HUMAN(pre=K,post=S);tr|E9PMR5|E9PMR5_HUMAN(pre=K,post=S);tr|A8MZH3|A8MZH3_HUMAN(pre=K,post=S);tr|H0YF02|H0YF02_HUMAN(pre=K,post=S);tr|E9PNZ1|E9PNZ1_HUMAN(pre=K,post=…	3	796.736	1	1	11	2	14	0	1	1	0	0.999996	1	Valid
619	20160312_10_A9.4456.4456.4 File:"20160312_10_A9.raw", NativeID:"controllerType=0 controllerNumber=1 scan=4456"	EEER+0.984QEALRQQEEERK	EEErQEALRQQEEERK	sp|Q6PUV4|CPLX2_HUMAN(pre=K,post=A);tr|D6RI05|D6RI05_HUMAN(pre=K,post=A);tr|D6R960|D6R960_HUMAN(pre=K,post=A);tr|D6RGY3|D6RGY3_HUMAN(pre=K,post=A);tr|D6RBA5|D6RBA5_HUMAN(pre=K,post=A)	4	522.755	1	0	1	0	1	1	2	3	0	0.731962	1	Valid
620	20160312_10_A9.4501.4501.3 File:"20160312_10_A9.raw", NativeID:"controllerType=0 controllerNumber=1 scan=4501"	NR+0.984DSDKTDTDWR	NrDSDKTDTDWR	sp|P23588|IF4B_HUMAN(pre=R,post=A);sp|P23588-2|IF4B_HUMAN(pre=R,post=A);tr|F8VSC7|F8VSC7_HUMAN(pre=R,post=A);tr|F8W0K0|F8W0K0_HUMAN(pre=R,post=A);tr|E7EX17|E7EX17_HUMAN(pre=R,post=A);tr|F8VP89|F8VP89_HUMAN(pre=R,post=A)	3	503.891	1	0	0	0	0	0	0	0	0	0.127083	0	Valid
621	20160312_10_A9.510.510.3 File:"20160312_10_A9.raw", NativeID:"controllerType=0 controllerNumber=1 scan=510"	KQDGAIEN+0.984R+0.984NK	KQDGAIEnrNK	tr|E7ERY9|E7ERY9_HUMAN(pre=K,post=A);sp|P20020|AT2B1_HUMAN(pre=K,post=A);sp|P20020-1|AT2B1_HUMAN(pre=K,post=A);sp|P20020-2|AT2B1_HUMAN(pre=K,post=A);sp|P20020-4|AT2B1_HUMAN(pre=K,post=A);sp|P20020-5|AT2B1_HUMAN(pre=K,post=A);sp|P20020-6|AT2B1_HUMAN(pre=K,post=A)	3	425.55	1	0	1	1	2	2	3	5	0	0.963886	1	Valid
622	20160312_10_A9.7003.7003.2 File:"20160312_10_A9.raw", NativeID:"controllerType=0 controllerNumber=1 scan=7003"	LDR+0.984TSSFR	LDrTSSFR	sp|Q96PV0|SYGP1_HUMAN(pre=K,post=Q);sp|Q96PV0-2|SYGP1_HUMAN(pre=K,post=Q);sp|Q96PV0-3|SYGP1_HUMAN(pre=K,post=Q);sp|Q96PV0-4|SYGP1_HUMAN(pre=K,post=Q);tr|B7ZCA0|B7ZCA0_HUMAN(pre=K,post=Q);tr|A0A2R8YDS2|A0A2R8YDS2_HUMAN(pre=K,post=Q);tr|A0A2R8Y6T2|A0A2R8Y6T2_HUMAN(pre=K,post=Q);tr|A0A1B0GW70|A0A1B0GW70_HUMAN(pre=K,post=Q);tr|A0A0A0MQZ2|A0A0A0MQZ2_HUMAN(pre=K,post=Q)	2	491.752	1	0	2	2	4	2	0	2	0	0.96375	1	Valid
623	20160312_10_A9.8846.8846.2 File:"20160312_10_A9.raw", NativeID:"controllerType=0 controllerNumber=1 scan=8846"	LR+0.984SSVPGVR	LrSSVPGVR	sp|P08670|VIME_HUMAN(pre=R,post=L);tr|B0YJC4|B0YJC4_HUMAN(pre=R,post=L);tr|A0A1B0GVG8|A0A1B0GVG8_HUMAN(pre=R,post=L);tr|A0A1B0GTT5|A0A1B0GTT5_HUMAN(pre=R,post=L)	2	486.286	1	0	1	0	1	0	1	1	0	0.425753	0	Valid
624	20160312_10_A9.9087.9087.2 File:"20160312_10_A9.raw", NativeID:"controllerType=0 controllerNumber=1 scan=9087"	FFGGDR+0.984GAPK	FFGGDrGAPK	tr|H7BYR8|H7BYR8_HUMAN(pre=R,post=R);sp|P02686|MBP_HUMAN(pre=R,post=R);sp|P02686-2|MBP_HUMAN(pre=R,post=R);sp|P02686-3|MBP_HUMAN(pre=R,post=R);sp|P02686-4|MBP_HUMAN(pre=R,post=R);sp|P02686-5|MBP_HUMAN(pre=R,post=R);sp|P02686-6|MBP_HUMAN(pre=R,post=R);tr|E9PKX9|E9PKX9_HUMAN(pre=R,post=R);tr|J3QL64|J3QL64_HUMAN(pre=R,post=R);tr|E9PJ72|E9PJ72_HUMAN(pre=R,post=R);tr|J3KT34|J3KT34_HUMAN(pre=R,post=R);…	2	526.762	1	0	1	1	2	0	0	0	0	0.5062	1	Valid
625	20160312_10_A9.9250.9250.2 File:"20160312_10_A9.raw", NativeID:"controllerType=0 controllerNumber=1 scan=9250"	FFGGDR+0.984GAPK	FFGGDrGAPK	tr|H7BYR8|H7BYR8_HUMAN(pre=R,post=R);sp|P02686|MBP_HUMAN(pre=R,post=R);sp|P02686-2|MBP_HUMAN(pre=R,post=R);sp|P02686-3|MBP_HUMAN(pre=R,post=R);sp|P02686-4|MBP_HUMAN(pre=R,post=R);sp|P02686-5|MBP_HUMAN(pre=R,post=R);sp|P02686-6|MBP_HUMAN(pre=R,post=R);tr|E9PKX9|E9PKX9_HUMAN(pre=R,post=R);tr|J3QL64|J3QL64_HUMAN(pre=R,post=R);tr|E9PJ72|E9PJ72_HUMAN(pre=R,post=R);tr|J3KT34|J3KT34_HUMAN(pre=R,post=R);…	2	526.762	1	0	1	0	1	0	0	0	0	0.278664	0	Valid
626	20160312_10_A9.9430.9430.2 File:"20160312_10_A9.raw", NativeID:"controllerType=0 controllerNumber=1 scan=9430"	FFGGDR+0.984GAPK	FFGGDrGAPK	tr|H7BYR8|H7BYR8_HUMAN(pre=R,post=R);sp|P02686|MBP_HUMAN(pre=R,post=R);sp|P02686-2|MBP_HUMAN(pre=R,post=R);sp|P02686-3|MBP_HUMAN(pre=R,post=R);sp|P02686-4|MBP_HUMAN(pre=R,post=R);sp|P02686-5|MBP_HUMAN(pre=R,post=R);sp|P02686-6|MBP_HUMAN(pre=R,post=R);tr|E9PKX9|E9PKX9_HUMAN(pre=R,post=R);tr|J3QL64|J3QL64_HUMAN(pre=R,post=R);tr|E9PJ72|E9PJ72_HUMAN(pre=R,post=R);tr|J3KT34|J3KT34_HUMAN(pre=R,post=R);…	2	526.762	1	0	1	0	1	0	0	0	0	0.278664	0	Valid
627	20160312_10_A9.9579.9579.2 File:"20160312_10_A9.raw", NativeID:"controllerType=0 controllerNumber=1 scan=9579"	YLATASTMDHAR+0.984	YLATASTMDHAr	tr|H7BYR8|H7BYR8_HUMAN(pre=K,post=H);sp|P02686|MBP_HUMAN(pre=K,post=H);sp|P02686-2|MBP_HUMAN(pre=K,post=H);sp|P02686-3|MBP_HUMAN(pre=K,post=H);sp|P02686-4|MBP_HUMAN(pre=K,post=H);sp|P02686-5|MBP_HUMAN(pre=K,post=H);sp|P02686-6|MBP_HUMAN(pre=K,post=H);tr|E9PLQ9|E9PLQ9_HUMAN(pre=K,post=H);tr|E9PKX9|E9PKX9_HUMAN(pre=K,post=H);tr|J3QL64|J3QL64_HUMAN(pre=K,post=H);tr|J3KS94|J3KS94_HUMAN(pre=K,post=-);…	2	669.312	1	0	8	0	8	0	0	0	0	0.997214	1	Valid
628	20160312_10_A9.9616.9616.2 File:"20160312_10_A9.raw", NativeID:"controllerType=0 controllerNumber=1 scan=9616"	FFGGDR+0.984GAPK	FFGGDrGAPK	tr|H7BYR8|H7BYR8_HUMAN(pre=R,post=R);sp|P02686|MBP_HUMAN(pre=R,post=R);sp|P02686-2|MBP_HUMAN(pre=R,post=R);sp|P02686-3|MBP_HUMAN(pre=R,post=R);sp|P02686-4|MBP_HUMAN(pre=R,post=R);sp|P02686-5|MBP_HUMAN(pre=R,post=R);sp|P02686-6|MBP_HUMAN(pre=R,post=R);tr|E9PKX9|E9PKX9_HUMAN(pre=R,post=R);tr|J3QL64|J3QL64_HUMAN(pre=R,post=R);tr|E9PJ72|E9PJ72_HUMAN(pre=R,post=R);tr|J3KT34|J3KT34_HUMAN(pre=R,post=R);…	2	526.762	1	0	5	3	8	1	0	1	0	0.998546	1	Valid
629	20160312_10_A9.9754.9754.3 File:"20160312_10_A9.raw", NativeID:"controllerType=0 controllerNumber=1 scan=9754"	R+0.984AC+57.021LVHNELLEK	rAcLVHNELLEK	sp|Q9UK61|TASOR_HUMAN(pre=R,post=E);sp|Q9UK61-3|TASOR_HUMAN(pre=R,post=E);sp|Q9UK61-4|TASOR_HUMAN(pre=R,post=E)	3	494.93	1	0	1	0	1	0	0	0	0	0.278664	0	Valid
630	20160312_11_A10.10269.10269.2 File:"20160312_11_A10.raw", NativeID:"controllerType=0 controllerNumber=1 scan=10269"	LSVEHKQ+0.984R+0.984PKVELM+15.995PR	LSVEHKqrPKVELmPR	sp|Q13045|FLII_HUMAN(pre=K,post=M);sp|Q13045-2|FLII_HUMAN(pre=K,post=M);sp|Q13045-3|FLII_HUMAN(pre=K,post=M)	2	983.033	1	1	1	4	6	0	1	1	0	0.989852	1	Valid
631	20160312_11_A10.11453.11453.2 File:"20160312_11_A10.raw", NativeID:"controllerType=0 controllerNumber=1 scan=11453"	SPGLPIR+0.984SAR	SPGLPIrSAR	sp|Q14CZ8|HECAM_HUMAN(pre=R,post=R)	2	527.804	1	1	8	1	10	0	2	2	0	0.999892	1	Valid
632	20160312_11_A10.11968.11968.2 File:"20160312_11_A10.raw", NativeID:"controllerType=0 controllerNumber=1 scan=11968"	PGFGYGGR+0.984ASDYK	PGFGYGGrASDYK	tr|H7BYR8|H7BYR8_HUMAN(pre=R,post=S);sp|P02686|MBP_HUMAN(pre=R,post=S);sp|P02686-3|MBP_HUMAN(pre=R,post=S);sp|P02686-4|MBP_HUMAN(pre=R,post=S);sp|P02686-5|MBP_HUMAN(pre=R,post=S);sp|P02686-6|MBP_HUMAN(pre=R,post=S);tr|C9J6H1|C9J6H1_HUMAN(pre=R,post=S);tr|J3QL64|J3QL64_HUMAN(pre=R,post=S);tr|E9PJ72|E9PJ72_HUMAN(pre=R,post=S);tr|A8MZH3|A8MZH3_HUMAN(pre=R,post=S)	2	688.318	1	1	6	1	8	1	0	1	0	0.998546	1	Valid
633	20160312_11_A10.12602.12602.3 File:"20160312_11_A10.raw", NativeID:"controllerType=0 controllerNumber=1 scan=12602"	YLATASTM+15.995DHAR+0.984HGFLPR	YLATASTmDHArHGFLPR	tr|H7BYR8|H7BYR8_HUMAN(pre=K,post=H);sp|P02686|MBP_HUMAN(pre=K,post=H);sp|P02686-2|MBP_HUMAN(pre=K,post=H);sp|P02686-3|MBP_HUMAN(pre=K,post=H);sp|P02686-4|MBP_HUMAN(pre=K,post=H);sp|P02686-5|MBP_HUMAN(pre=K,post=H);sp|P02686-6|MBP_HUMAN(pre=K,post=H);tr|E9PLQ9|E9PLQ9_HUMAN(pre=K,post=T);tr|E9PKX9|E9PKX9_HUMAN(pre=K,post=H);tr|J3QL64|J3QL64_HUMAN(pre=K,post=H);tr|J3KT34|J3KT34_HUMAN(pre=K,post=H);…	3	687.671	1	0	9	3	12	0	1	1	0	0.999971	1	Valid
634	20160312_11_A10.12634.12634.2 File:"20160312_11_A10.raw", NativeID:"controllerType=0 controllerNumber=1 scan=12634"	YLATASTM+15.995DHAR+0.984HGFLPR	YLATASTmDHArHGFLPR	tr|H7BYR8|H7BYR8_HUMAN(pre=K,post=H);sp|P02686|MBP_HUMAN(pre=K,post=H);sp|P02686-2|MBP_HUMAN(pre=K,post=H);sp|P02686-3|MBP_HUMAN(pre=K,post=H);sp|P02686-4|MBP_HUMAN(pre=K,post=H);sp|P02686-5|MBP_HUMAN(pre=K,post=H);sp|P02686-6|MBP_HUMAN(pre=K,post=H);tr|E9PLQ9|E9PLQ9_HUMAN(pre=K,post=T);tr|E9PKX9|E9PKX9_HUMAN(pre=K,post=H);tr|J3QL64|J3QL64_HUMAN(pre=K,post=H);tr|J3KT34|J3KT34_HUMAN(pre=K,post=H);…	2	1031	1	1	5	0	6	0	0	0	0	0.980705	1	Valid
635	20160312_11_A10.12852.12852.2 File:"20160312_11_A10.raw", NativeID:"controllerType=0 controllerNumber=1 scan=12852"	LIGTAVPQR+0.984TSPTGPK	LIGTAVPQrTSPTGPK	sp|Q9UPY8|MARE3_HUMAN(pre=K,post=N);tr|C9JB30|C9JB30_HUMAN(pre=K,post=N)	2	812.457	1	0	4	1	5	0	1	1	0	0.973517	1	Valid
636	20160312_11_A10.15378.15378.4 File:"20160312_11_A10.raw", NativeID:"controllerType=0 controllerNumber=1 scan=15378"	YLATASTMDHAR+0.984HGFLPR	YLATASTMDHArHGFLPR	tr|H7BYR8|H7BYR8_HUMAN(pre=K,post=H);sp|P02686|MBP_HUMAN(pre=K,post=H);sp|P02686-2|MBP_HUMAN(pre=K,post=H);sp|P02686-3|MBP_HUMAN(pre=K,post=H);sp|P02686-4|MBP_HUMAN(pre=K,post=H);sp|P02686-5|MBP_HUMAN(pre=K,post=H);sp|P02686-6|MBP_HUMAN(pre=K,post=H);tr|E9PLQ9|E9PLQ9_HUMAN(pre=K,post=T);tr|E9PKX9|E9PKX9_HUMAN(pre=K,post=H);tr|J3QL64|J3QL64_HUMAN(pre=K,post=H);tr|J3KT34|J3KT34_HUMAN(pre=K,post=H);…	4	512.007	1	0	4	1	5	0	0	0	0	0.950382	1	Valid
637	20160312_11_A10.15458.15458.2 File:"20160312_11_A10.raw", NativeID:"controllerType=0 controllerNumber=1 scan=15458"	M+15.995PRAER+0.984KWEWRR	mPRAErKWEWRR	tr|I3L4C8|I3L4C8_HUMAN(pre=R,post=C)	2	859.439	1	1	0	0	1	0	0	0	0	0.278664	0	Valid
638	20160312_11_A10.15496.15496.2 File:"20160312_11_A10.raw", NativeID:"controllerType=0 controllerNumber=1 scan=15496"	FPGQLNADLR+0.984K	FPGQLNADLrK	sp|Q9BUF5|TBB6_HUMAN(pre=R,post=L);sp|A6NNZ2|TBB8L_HUMAN(pre=R,post=L);sp|Q9BVA1|TBB2B_HUMAN(pre=R,post=L);sp|P07437|TBB5_HUMAN(pre=R,post=L);sp|P04350|TBB4A_HUMAN(pre=R,post=L);sp|Q9H4B7|TBB1_HUMAN(pre=R,post=L);sp|Q13509|TBB3_HUMAN(pre=R,post=L);sp|Q13509-2|TBB3_HUMAN(pre=R,post=L);sp|P68371|TBB4B_HUMAN(pre=R,post=L);sp|Q3ZCM7|TBB8_HUMAN(pre=R,post=L);sp|Q13885|TBB2A_HUMAN(pre=R,post=L);tr|Q5ST…	2	630.341	1	0	2	1	3	1	0	1	0	0.839242	1	Valid
639	20160312_11_A10.15763.15763.3 File:"20160312_11_A10.raw", NativeID:"controllerType=0 controllerNumber=1 scan=15763"	YLATASTMDHAR+0.984HGFLPR	YLATASTMDHArHGFLPR	tr|H7BYR8|H7BYR8_HUMAN(pre=K,post=H);sp|P02686|MBP_HUMAN(pre=K,post=H);sp|P02686-2|MBP_HUMAN(pre=K,post=H);sp|P02686-3|MBP_HUMAN(pre=K,post=H);sp|P02686-4|MBP_HUMAN(pre=K,post=H);sp|P02686-5|MBP_HUMAN(pre=K,post=H);sp|P02686-6|MBP_HUMAN(pre=K,post=H);tr|E9PLQ9|E9PLQ9_HUMAN(pre=K,post=T);tr|E9PKX9|E9PKX9_HUMAN(pre=K,post=H);tr|J3QL64|J3QL64_HUMAN(pre=K,post=H);tr|J3KT34|J3KT34_HUMAN(pre=K,post=H);…	3	682.339	1	0	11	6	17	0	1	1	0	1	1	Valid
640	20160312_11_A10.15798.15798.4 File:"20160312_11_A10.raw", NativeID:"controllerType=0 controllerNumber=1 scan=15798"	YLATASTMDHAR+0.984HGFLPR	YLATASTMDHArHGFLPR	tr|H7BYR8|H7BYR8_HUMAN(pre=K,post=H);sp|P02686|MBP_HUMAN(pre=K,post=H);sp|P02686-2|MBP_HUMAN(pre=K,post=H);sp|P02686-3|MBP_HUMAN(pre=K,post=H);sp|P02686-4|MBP_HUMAN(pre=K,post=H);sp|P02686-5|MBP_HUMAN(pre=K,post=H);sp|P02686-6|MBP_HUMAN(pre=K,post=H);tr|E9PLQ9|E9PLQ9_HUMAN(pre=K,post=T);tr|E9PKX9|E9PKX9_HUMAN(pre=K,post=H);tr|J3QL64|J3QL64_HUMAN(pre=K,post=H);tr|J3KT34|J3KT34_HUMAN(pre=K,post=H);…	4	512.007	1	0	6	5	11	0	1	1	0	0.999922	1	Valid
641	20160312_11_A10.16102.16102.3 File:"20160312_11_A10.raw", NativeID:"controllerType=0 controllerNumber=1 scan=16102"	YLATASTMDHAR+0.984HGFLPR	YLATASTMDHArHGFLPR	tr|H7BYR8|H7BYR8_HUMAN(pre=K,post=H);sp|P02686|MBP_HUMAN(pre=K,post=H);sp|P02686-2|MBP_HUMAN(pre=K,post=H);sp|P02686-3|MBP_HUMAN(pre=K,post=H);sp|P02686-4|MBP_HUMAN(pre=K,post=H);sp|P02686-5|MBP_HUMAN(pre=K,post=H);sp|P02686-6|MBP_HUMAN(pre=K,post=H);tr|E9PLQ9|E9PLQ9_HUMAN(pre=K,post=T);tr|E9PKX9|E9PKX9_HUMAN(pre=K,post=H);tr|J3QL64|J3QL64_HUMAN(pre=K,post=H);tr|J3KT34|J3KT34_HUMAN(pre=K,post=H);…	3	682.339	1	0	10	6	16	0	1	1	0	0.999999	1	Valid
642	20160312_11_A10.16145.16145.2 File:"20160312_11_A10.raw", NativeID:"controllerType=0 controllerNumber=1 scan=16145"	YLATASTMDHAR+0.984HGFLPR	YLATASTMDHArHGFLPR	tr|H7BYR8|H7BYR8_HUMAN(pre=K,post=H);sp|P02686|MBP_HUMAN(pre=K,post=H);sp|P02686-2|MBP_HUMAN(pre=K,post=H);sp|P02686-3|MBP_HUMAN(pre=K,post=H);sp|P02686-4|MBP_HUMAN(pre=K,post=H);sp|P02686-5|MBP_HUMAN(pre=K,post=H);sp|P02686-6|MBP_HUMAN(pre=K,post=H);tr|E9PLQ9|E9PLQ9_HUMAN(pre=K,post=T);tr|E9PKX9|E9PKX9_HUMAN(pre=K,post=H);tr|J3QL64|J3QL64_HUMAN(pre=K,post=H);tr|J3KT34|J3KT34_HUMAN(pre=K,post=H);…	2	1023.01	1	2	14	4	20	0	1	1	0	1	1	Valid
643	20160312_11_A10.16285.16285.3 File:"20160312_11_A10.raw", NativeID:"controllerType=0 controllerNumber=1 scan=16285"	YLATASTMDHAR+0.984HGFLPR	YLATASTMDHArHGFLPR	tr|H7BYR8|H7BYR8_HUMAN(pre=K,post=H);sp|P02686|MBP_HUMAN(pre=K,post=H);sp|P02686-2|MBP_HUMAN(pre=K,post=H);sp|P02686-3|MBP_HUMAN(pre=K,post=H);sp|P02686-4|MBP_HUMAN(pre=K,post=H);sp|P02686-5|MBP_HUMAN(pre=K,post=H);sp|P02686-6|MBP_HUMAN(pre=K,post=H);tr|E9PLQ9|E9PLQ9_HUMAN(pre=K,post=T);tr|E9PKX9|E9PKX9_HUMAN(pre=K,post=H);tr|J3QL64|J3QL64_HUMAN(pre=K,post=H);tr|J3KT34|J3KT34_HUMAN(pre=K,post=H);…	3	682.339	1	0	1	1	2	0	0	0	0	0.5062	1	Valid
644	20160312_11_A10.16310.16310.4 File:"20160312_11_A10.raw", NativeID:"controllerType=0 controllerNumber=1 scan=16310"	YLATASTMDHAR+0.984HGFLPR	YLATASTMDHArHGFLPR	tr|H7BYR8|H7BYR8_HUMAN(pre=K,post=H);sp|P02686|MBP_HUMAN(pre=K,post=H);sp|P02686-2|MBP_HUMAN(pre=K,post=H);sp|P02686-3|MBP_HUMAN(pre=K,post=H);sp|P02686-4|MBP_HUMAN(pre=K,post=H);sp|P02686-5|MBP_HUMAN(pre=K,post=H);sp|P02686-6|MBP_HUMAN(pre=K,post=H);tr|E9PLQ9|E9PLQ9_HUMAN(pre=K,post=T);tr|E9PKX9|E9PKX9_HUMAN(pre=K,post=H);tr|J3QL64|J3QL64_HUMAN(pre=K,post=H);tr|J3KT34|J3KT34_HUMAN(pre=K,post=H);…	4	512.007	1	0	0	0	0	0	0	0	0	0.127083	0	Ambiguous
645	20160312_11_A10.16311.16311.3 File:"20160312_11_A10.raw", NativeID:"controllerType=0 controllerNumber=1 scan=16311"	YLATASTMDHAR+0.984HGFLPR	YLATASTMDHArHGFLPR	tr|H7BYR8|H7BYR8_HUMAN(pre=K,post=H);sp|P02686|MBP_HUMAN(pre=K,post=H);sp|P02686-2|MBP_HUMAN(pre=K,post=H);sp|P02686-3|MBP_HUMAN(pre=K,post=H);sp|P02686-4|MBP_HUMAN(pre=K,post=H);sp|P02686-5|MBP_HUMAN(pre=K,post=H);sp|P02686-6|MBP_HUMAN(pre=K,post=H);tr|E9PLQ9|E9PLQ9_HUMAN(pre=K,post=T);tr|E9PKX9|E9PKX9_HUMAN(pre=K,post=H);tr|J3QL64|J3QL64_HUMAN(pre=K,post=H);tr|J3KT34|J3KT34_HUMAN(pre=K,post=H);…	3	682.339	1	0	0	0	0	0	0	0	0	0.127083	0	Ambiguous
646	20160312_11_A10.16327.16327.2 File:"20160312_11_A10.raw", NativeID:"controllerType=0 controllerNumber=1 scan=16327"	YLATASTMDHAR+0.984HGFLPR	YLATASTMDHArHGFLPR	tr|H7BYR8|H7BYR8_HUMAN(pre=K,post=H);sp|P02686|MBP_HUMAN(pre=K,post=H);sp|P02686-2|MBP_HUMAN(pre=K,post=H);sp|P02686-3|MBP_HUMAN(pre=K,post=H);sp|P02686-4|MBP_HUMAN(pre=K,post=H);sp|P02686-5|MBP_HUMAN(pre=K,post=H);sp|P02686-6|MBP_HUMAN(pre=K,post=H);tr|E9PLQ9|E9PLQ9_HUMAN(pre=K,post=T);tr|E9PKX9|E9PKX9_HUMAN(pre=K,post=H);tr|J3QL64|J3QL64_HUMAN(pre=K,post=H);tr|J3KT34|J3KT34_HUMAN(pre=K,post=H);…	2	1023.01	1	2	9	3	14	0	1	1	0	0.999996	1	Valid
647	20160312_11_A10.16493.16493.2 File:"20160312_11_A10.raw", NativeID:"controllerType=0 controllerNumber=1 scan=16493"	ERSGEAVDR+0.984SLLR	ERSGEAVDrSLLR	sp|Q13619|CUL4A_HUMAN(pre=R,post=S);sp|Q13619-2|CUL4A_HUMAN(pre=R,post=S);tr|A0A0A0MR50|A0A0A0MR50_HUMAN(pre=R,post=S)	2	744.892	1	0	0	1	1	0	1	1	0	0.425753	0	Valid
648	20160312_11_A10.16640.16640.2 File:"20160312_11_A10.raw", NativeID:"controllerType=0 controllerNumber=1 scan=16640"	AQALR+0.984DNSTMGYMMAK	AQALrDNSTMGYMMAK	sp|P08238|HS90B_HUMAN(pre=K,post=K);sp|Q58FF7|H90B3_HUMAN(pre=K,post=K)	2	894.908	1	0	0	0	0	0	0	0	0	0.127083	0	Ambiguous
649	20160312_11_A10.17871.17871.3 File:"20160312_11_A10.raw", NativeID:"controllerType=0 controllerNumber=1 scan=17871"	FSWGAEGQRPGFGYGGR+0.984ASDYK	FSWGAEGQRPGFGYGGrASDYK	sp|P02686|MBP_HUMAN(pre=R,post=S);sp|P02686-3|MBP_HUMAN(pre=R,post=S);sp|P02686-5|MBP_HUMAN(pre=R,post=S);tr|C9J6H1|C9J6H1_HUMAN(pre=R,post=S);tr|J3QL64|J3QL64_HUMAN(pre=R,post=S);tr|E9PJ72|E9PJ72_HUMAN(pre=R,post=S);tr|A8MZH3|A8MZH3_HUMAN(pre=R,post=S)	3	798.702	1	0	3	0	3	0	0	0	0	0.731196	1	Valid
650	20160312_11_A10.18648.18648.4 File:"20160312_11_A10.raw", NativeID:"controllerType=0 controllerNumber=1 scan=18648"	LLAGLTR+0.984PDVRPPLGR	LLAGLTrPDVRPPLGR	sp|Q99611|SPS2_HUMAN(pre=K,post=G)	4	433.762	1	0	2	2	4	2	1	3	0	0.980778	1	Valid
651	20160312_11_A10.19145.19145.3 File:"20160312_11_A10.raw", NativeID:"controllerType=0 controllerNumber=1 scan=19145"	GEFGVYLVSDGSSR+0.984PYR	GEFGVYLVSDGSSrPYR	sp|O75306|NDUS2_HUMAN(pre=K,post=C);sp|O75306-2|NDUS2_HUMAN(pre=K,post=C)	3	630.64	1	0	0	0	0	0	0	0	0	0.127083	0	Valid
652	20160312_11_A10.19319.19319.2 File:"20160312_11_A10.raw", NativeID:"controllerType=0 controllerNumber=1 scan=19319"	R+0.984SYVSSGEM+15.995MVGGLAPGR	rSYVSSGEmMVGGLAPGR	sp|P14136|GFAP_HUMAN(pre=R,post=R);sp|P14136-2|GFAP_HUMAN(pre=R,post=R);sp|P14136-3|GFAP_HUMAN(pre=R,post=R);tr|B4DIR1|B4DIR1_HUMAN(pre=R,post=R);tr|K7ELP4|K7ELP4_HUMAN(pre=R,post=R);tr|K7EMP8|K7EMP8_HUMAN(pre=R,post=R);tr|K7EKH9|K7EKH9_HUMAN(pre=R,post=R);tr|A0A1X7SCE1|A0A1X7SCE1_HUMAN(pre=R,post=R);tr|A0A1X7SBR3|A0A1X7SBR3_HUMAN(pre=R,post=R);tr|A0A1W2PR46|A0A1W2PR46_HUMAN(pre=R,post=R);tr|K7EJ…	2	935.943	1	0	0	0	0	0	0	0	0	0.127083	0	Valid
653	20160312_11_A10.19364.19364.2 File:"20160312_11_A10.raw", NativeID:"controllerType=0 controllerNumber=1 scan=19364"	LR+0.984DYIWN+0.984TLN+0.984SGR	LrDYIWnTLnSGR	tr|B4DJV2|B4DJV2_HUMAN(pre=K,post=V);tr|H0YIC4|H0YIC4_HUMAN(pre=-,post=V);tr|A0A0C4DGI3|A0A0C4DGI3_HUMAN(pre=K,post=V);sp|O75390|CISY_HUMAN(pre=K,post=V)	2	805.895	1	1	1	1	3	2	0	2	0	0.909249	1	Valid
654	20160312_11_A10.20297.20297.3 File:"20160312_11_A10.raw", NativeID:"controllerType=0 controllerNumber=1 scan=20297"	FLSLAN+0.984KR+0.984LPVKR+0.984AAVQ+0.984FLN+0.984N+0.984AWGIQK	FLSLAnKrLPVKrAAVqFLnnAWGIQK	sp|Q9UMY1|NOL7_HUMAN(pre=K,post=K)	3	1030.23	2	0	0	5	5	0	1	1	0	0.973517	1	Valid
655	20160312_11_A10.20679.20679.2 File:"20160312_11_A10.raw", NativeID:"controllerType=0 controllerNumber=1 scan=20679"	SPSPLR+0.984GNVVPSPLPTR	SPSPLrGNVVPSPLPTR	sp|Q9Y2V2|CHSP1_HUMAN(pre=R,post=R);tr|H3BUY4|H3BUY4_HUMAN(pre=R,post=R);tr|H3BTK3|H3BTK3_HUMAN(pre=R,post=R);tr|I3L3X8|I3L3X8_HUMAN(pre=R,post=R);tr|H3BSW7|H3BSW7_HUMAN(pre=R,post=R);tr|H3BNU9|H3BNU9_HUMAN(pre=R,post=R);tr|H3BPY5|H3BPY5_HUMAN(pre=R,post=R)	2	887.995	1	1	7	6	14	1	2	3	0	0.999999	1	Valid
656	20160312_11_A10.20905.20905.2 File:"20160312_11_A10.raw", NativeID:"controllerType=0 controllerNumber=1 scan=20905"	R+0.984SYVSSGEMMVGGLAPGR	rSYVSSGEMMVGGLAPGR	sp|P14136|GFAP_HUMAN(pre=R,post=R);sp|P14136-2|GFAP_HUMAN(pre=R,post=R);sp|P14136-3|GFAP_HUMAN(pre=R,post=R);tr|B4DIR1|B4DIR1_HUMAN(pre=R,post=R);tr|K7ELP4|K7ELP4_HUMAN(pre=R,post=R);tr|K7EMP8|K7EMP8_HUMAN(pre=R,post=R);tr|K7EKH9|K7EKH9_HUMAN(pre=R,post=R);tr|A0A1X7SCE1|A0A1X7SCE1_HUMAN(pre=R,post=R);tr|A0A1X7SBR3|A0A1X7SBR3_HUMAN(pre=R,post=R);tr|A0A1W2PR46|A0A1W2PR46_HUMAN(pre=R,post=R);tr|K7EJ…	2	927.946	1	0	0	0	0	0	0	0	0	0.127083	0	Valid
657	20160312_11_A10.20917.20917.3 File:"20160312_11_A10.raw", NativeID:"controllerType=0 controllerNumber=1 scan=20917"	R+0.984SYVSSGEMMVGGLAPGR	rSYVSSGEMMVGGLAPGR	sp|P14136|GFAP_HUMAN(pre=R,post=R);sp|P14136-2|GFAP_HUMAN(pre=R,post=R);sp|P14136-3|GFAP_HUMAN(pre=R,post=R);tr|B4DIR1|B4DIR1_HUMAN(pre=R,post=R);tr|K7ELP4|K7ELP4_HUMAN(pre=R,post=R);tr|K7EMP8|K7EMP8_HUMAN(pre=R,post=R);tr|K7EKH9|K7EKH9_HUMAN(pre=R,post=R);tr|A0A1X7SCE1|A0A1X7SCE1_HUMAN(pre=R,post=R);tr|A0A1X7SBR3|A0A1X7SBR3_HUMAN(pre=R,post=R);tr|A0A1W2PR46|A0A1W2PR46_HUMAN(pre=R,post=R);tr|K7EJ…	3	618.967	1	0	2	0	2	0	0	0	0	0.5062	1	Valid
658	20160312_11_A10.215.215.2 File:"20160312_11_A10.raw", NativeID:"controllerType=0 controllerNumber=1 scan=215"	Q+0.984Q+0.984R+0.984EQ+0.984EQ+0.984R	qqrEqEqR	sp|Q6NSJ2|PHLB3_HUMAN(pre=R,post=R);sp|Q6NSJ2-2|PHLB3_HUMAN(pre=R,post=R)	2	553.734	1	0	1	0	1	0	0	0	0	0.278664	0	Ambiguous
659	20160312_11_A10.24768.24768.3 File:"20160312_11_A10.raw", NativeID:"controllerType=0 controllerNumber=1 scan=24768"	GLSLSR+0.984FSWGAEGQRPGFGYGGR	GLSLSrFSWGAEGQRPGFGYGGR	sp|P02686|MBP_HUMAN(pre=R,post=A);sp|P02686-3|MBP_HUMAN(pre=R,post=A);sp|P02686-5|MBP_HUMAN(pre=R,post=A);tr|C9J6H1|C9J6H1_HUMAN(pre=R,post=A);tr|J3QL64|J3QL64_HUMAN(pre=R,post=A);tr|E9PJ72|E9PJ72_HUMAN(pre=R,post=A);tr|A8MZH3|A8MZH3_HUMAN(pre=R,post=A)	3	815.069	1	0	3	2	5	1	0	1	0	0.973517	1	Valid
660	20160312_11_A10.25582.25582.2 File:"20160312_11_A10.raw", NativeID:"controllerType=0 controllerNumber=1 scan=25582"	KAVGHLIPFMEKER+0.984EETR	KAVGHLIPFMEKErEETR	sp|Q99707|METH_HUMAN(pre=K,post=V);sp|Q99707-2|METH_HUMAN(pre=K,post=V);tr|B1ANE3|B1ANE3_HUMAN(pre=K,post=V)	2	1086.07	1	0	1	0	1	0	0	0	0	0.278664	0	Valid
661	20160312_11_A10.26631.26631.3 File:"20160312_11_A10.raw", NativeID:"controllerType=0 controllerNumber=1 scan=26631"	SGPFGQLFR+0.984PDN+0.984FIFGQ+0.984TGAGN+0.984NWAK	SGPFGQLFrPDnFIFGqTGAGnNWAK	sp|Q9BUF5|TBB6_HUMAN(pre=R,post=G);tr|K7EN98|K7EN98_HUMAN(pre=R,post=G);tr|K7EL29|K7EL29_HUMAN(pre=R,post=G);tr|K7ES63|K7ES63_HUMAN(pre=R,post=G)	3	944.109	1	0	1	0	1	0	0	0	0	0.278664	0	Valid
662	20160312_11_A10.27076.27076.3 File:"20160312_11_A10.raw", NativeID:"controllerType=0 controllerNumber=1 scan=27076"	VSFSYAGLSGDDPDLGPAHVVTVIAR+0.984	VSFSYAGLSGDDPDLGPAHVVTVIAr	sp|Q9BTV4|TMM43_HUMAN(pre=R,post=Q)	3	882.114	1	0	0	0	0	0	0	0	0	0.127083	0	Valid
663	20160312_11_A10.27391.27391.3 File:"20160312_11_A10.raw", NativeID:"controllerType=0 controllerNumber=1 scan=27391"	SGPFGQLFR+0.984PDN+0.984FIFGQ+0.984TGAGN+0.984NWAK	SGPFGQLFrPDnFIFGqTGAGnNWAK	sp|Q9BUF5|TBB6_HUMAN(pre=R,post=G);tr|K7EN98|K7EN98_HUMAN(pre=R,post=G);tr|K7EL29|K7EL29_HUMAN(pre=R,post=G);tr|K7ES63|K7ES63_HUMAN(pre=R,post=G)	3	944.109	1	0	1	0	1	0	0	0	0	0.278664	0	Valid
664	20160312_11_A10.27701.27701.3 File:"20160312_11_A10.raw", NativeID:"controllerType=0 controllerNumber=1 scan=27701"	SC+57.021SGPLRR+0.984PTLLALPR+0.984APRWDR	ScSGPLRrPTLLALPrAPRWDR	tr|F2Z2V4|F2Z2V4_HUMAN(pre=R,post=P)	3	859.8	2	0	3	0	3	0	0	0	0	0.731196	1	Valid
665	20160312_11_A10.29061.29061.3 File:"20160312_11_A10.raw", NativeID:"controllerType=0 controllerNumber=1 scan=29061"	SGPFGQIFR+0.984PDNFVFGQSGAGNNWAK	SGPFGQIFrPDNFVFGQSGAGNNWAK	sp|Q9BVA1|TBB2B_HUMAN(pre=R,post=G);sp|P07437|TBB5_HUMAN(pre=R,post=G);sp|P04350|TBB4A_HUMAN(pre=R,post=G);sp|P68371|TBB4B_HUMAN(pre=R,post=G);sp|Q13885|TBB2A_HUMAN(pre=R,post=G);tr|Q5ST81|Q5ST81_HUMAN(pre=R,post=G);tr|Q5JP53|Q5JP53_HUMAN(pre=R,post=G);tr|M0R278|M0R278_HUMAN(pre=R,post=G);tr|M0QY85|M0QY85_HUMAN(pre=R,post=G);tr|M0R1I1|M0R1I1_HUMAN(pre=R,post=G);tr|M0QZL7|M0QZL7_HUMAN(pre=R,post=G)	3	933.781	1	0	0	0	0	0	0	0	0	0.127083	0	Valid
666	20160312_11_A10.29363.29363.3 File:"20160312_11_A10.raw", NativeID:"controllerType=0 controllerNumber=1 scan=29363"	VLTTTALSTVSSGVQR+0.984VLVNSASAQK	VLTTTALSTVSSGVQrVLVNSASAQK	tr|E3W994|E3W994_HUMAN(pre=R,post=R);tr|J3KR49|J3KR49_HUMAN(pre=R,post=R);tr|E7ERI8|E7ERI8_HUMAN(pre=R,post=R);tr|E7EW49|E7EW49_HUMAN(pre=R,post=R);tr|A0A0U1RQI6|A0A0U1RQI6_HUMAN(pre=R,post=R);sp|O75122|CLAP2_HUMAN(pre=R,post=R);sp|O75122-3|CLAP2_HUMAN(pre=R,post=R)	3	873.484	1	0	0	0	0	2	1	3	0	0.507175	1	Valid
667	20160312_11_A10.29431.29431.3 File:"20160312_11_A10.raw", NativeID:"controllerType=0 controllerNumber=1 scan=29431"	MPNTFMAVAMDLC+57.021DR+0.984DSPFGSIHPR	MPNTFMAVAMDLcDrDSPFGSIHPR	sp|Q9HAT2|SIAE_HUMAN(pre=K,post=D);sp|Q9HAT2-2|SIAE_HUMAN(pre=K,post=D)	3	956.098	1	0	0	0	0	0	1	1	0	0.218385	0	Valid
668	20160312_11_A10.29492.29492.3 File:"20160312_11_A10.raw", NativeID:"controllerType=0 controllerNumber=1 scan=29492"	RHYR+0.984R+0.984LALLGLQ+0.984PAPR	RHYrrLALLGLqPAPR	sp|Q7Z4L0|COX8C_HUMAN(pre=R,post=F)	3	640.703	2	0	3	0	3	0	0	0	0	0.731196	1	Valid
669	20160312_11_A10.30090.30090.3 File:"20160312_11_A10.raw", NativeID:"controllerType=0 controllerNumber=1 scan=30090"	ENPRAM+15.995AKLLR+0.984EAN+0.984R+0.984LK	ENPRAmAKLLrEAnrLK	sp|Q9Y4L1|HYOU1_HUMAN(pre=R,post=T);sp|Q9Y4L1-2|HYOU1_HUMAN(pre=R,post=T);tr|E9PJ21|E9PJ21_HUMAN(pre=R,post=T);tr|A0A087WWI4|A0A087WWI4_HUMAN(pre=R,post=T);tr|A0A087X054|A0A087X054_HUMAN(pre=R,post=T);tr|K7EQK2|K7EQK2_HUMAN(pre=R,post=T)	3	677.034	2	0	1	1	2	0	1	1	0	0.663002	1	Valid
670	20160312_11_A10.30918.30918.3 File:"20160312_11_A10.raw", NativeID:"controllerType=0 controllerNumber=1 scan=30918"	GVRAR+0.984ADAAAAAGGPR+0.984ATAR	GVRArADAAAAAGGPrATAR	tr|H0YCF5|H0YCF5_HUMAN(pre=R,post=A)	3	623.334	2	0	5	3	8	0	0	0	0	0.997214	1	Valid
671	20160312_11_A10.31922.31922.4 File:"20160312_11_A10.raw", NativeID:"controllerType=0 controllerNumber=1 scan=31922"	YLEELSQR+0.984YRKQ+0.984M+15.995EEMQK	YLEELSQrYRKqmEEMQK	sp|Q9UBS9|SUCO_HUMAN(pre=R,post=A);sp|Q9UBS9-2|SUCO_HUMAN(pre=R,post=A);tr|A0A087WV04|A0A087WV04_HUMAN(pre=R,post=A)	4	602.538	1	0	0	0	0	0	0	0	0	0.127083	0	Ambiguous
672	20160312_11_A10.33057.33057.3 File:"20160312_11_A10.raw", NativeID:"controllerType=0 controllerNumber=1 scan=33057"	KTHM+15.995Q+0.984FHYKPDPKKAR+0.984KPMTR	KTHmqFHYKPDPKKArKPMTR	sp|Q9UL36|ZN236_HUMAN(pre=R,post=S);sp|Q9UL36-2|ZN236_HUMAN(pre=R,post=S);tr|J9JID5|J9JID5_HUMAN(pre=R,post=S)	3	881.794	1	1	1	2	4	1	0	1	0	0.932673	1	Valid
673	20160312_11_A10.3351.3351.2 File:"20160312_11_A10.raw", NativeID:"controllerType=0 controllerNumber=1 scan=3351"	DSR+0.984SGSPMAR	DSrSGSPMAR	tr|H7BYR8|H7BYR8_HUMAN(pre=R,post=R);sp|P02686|MBP_HUMAN(pre=R,post=R);sp|P02686-3|MBP_HUMAN(pre=R,post=R);sp|P02686-4|MBP_HUMAN(pre=R,post=R);sp|P02686-5|MBP_HUMAN(pre=R,post=R);sp|P02686-6|MBP_HUMAN(pre=R,post=R);tr|E9PJ72|E9PJ72_HUMAN(pre=R,post=R);tr|A8MZH3|A8MZH3_HUMAN(pre=R,post=R);tr|J3QQK6|J3QQK6_HUMAN(pre=R,post=R);tr|F8WEU6|F8WEU6_HUMAN(pre=R,post=R)	2	532.744	1	0	1	0	1	0	0	0	1	0.861678	1	Valid
674	20160312_11_A10.8245.8245.2 File:"20160312_11_A10.raw", NativeID:"controllerType=0 controllerNumber=1 scan=8245"	LSSPAVIN+0.984SR+0.984	LSSPAVInSr	sp|P07478|TRY2_HUMAN(pre=K,post=V);tr|A6XMV8|A6XMV8_HUMAN(pre=K,post=E);tr|A6XMV9|A6XMV9_HUMAN(pre=K,post=V);tr|A0A0J9YYC8|A0A0J9YYC8_HUMAN(pre=K,post=V)	2	523.28	1	0	0	0	0	0	0	0	0	0.127083	0	Ambiguous
675	20160312_11_A10.9353.9353.2 File:"20160312_11_A10.raw", NativeID:"controllerType=0 controllerNumber=1 scan=9353"	YR+0.984SLAQPATTTAR	YrSLAQPATTTAR	sp|Q765P7|MTSSL_HUMAN(pre=R,post=L);tr|A0A087WXN9|A0A087WXN9_HUMAN(pre=R,post=L)	2	718.879	1	0	1	0	1	0	0	0	0	0.278664	0	Valid
676	20160312_12_A11.10176.10176.2 File:"20160312_12_A11.raw", NativeID:"controllerType=0 controllerNumber=1 scan=10176"	NIVTPR+0.984TPPPSQGK	NIVTPrTPPPSQGK	tr|H7BYR8|H7BYR8_HUMAN(pre=K,post=G);sp|P02686|MBP_HUMAN(pre=K,post=G);sp|P02686-3|MBP_HUMAN(pre=K,post=G);sp|P02686-4|MBP_HUMAN(pre=K,post=G);sp|P02686-5|MBP_HUMAN(pre=K,post=G);sp|P02686-6|MBP_HUMAN(pre=K,post=G);tr|C9J6H1|C9J6H1_HUMAN(pre=K,post=G);tr|J3QL64|J3QL64_HUMAN(pre=K,post=G);tr|E9PJ72|E9PJ72_HUMAN(pre=K,post=G);tr|J3QKL5|J3QKL5_HUMAN(pre=K,post=G);tr|J3KT01|J3KT01_HUMAN(pre=K,post=G)…	2	746.91	1	1	7	2	10	2	2	4	0	0.999971	1	Valid
677	20160312_12_A11.10336.10336.2 File:"20160312_12_A11.raw", NativeID:"controllerType=0 controllerNumber=1 scan=10336"	NIVTPR+0.984TPPPSQGK	NIVTPrTPPPSQGK	tr|H7BYR8|H7BYR8_HUMAN(pre=K,post=G);sp|P02686|MBP_HUMAN(pre=K,post=G);sp|P02686-3|MBP_HUMAN(pre=K,post=G);sp|P02686-4|MBP_HUMAN(pre=K,post=G);sp|P02686-5|MBP_HUMAN(pre=K,post=G);sp|P02686-6|MBP_HUMAN(pre=K,post=G);tr|C9J6H1|C9J6H1_HUMAN(pre=K,post=G);tr|J3QL64|J3QL64_HUMAN(pre=K,post=G);tr|E9PJ72|E9PJ72_HUMAN(pre=K,post=G);tr|J3QKL5|J3QKL5_HUMAN(pre=K,post=G);tr|J3KT01|J3KT01_HUMAN(pre=K,post=G)…	2	746.91	1	0	5	2	7	2	2	4	0	0.999454	1	Valid
678	20160312_12_A11.10372.10372.2 File:"20160312_12_A11.raw", NativeID:"controllerType=0 controllerNumber=1 scan=10372"	GAEGQR+0.984PGFGYGGR	GAEGQrPGFGYGGR	tr|H7BYR8|H7BYR8_HUMAN(pre=K,post=A);sp|P02686-4|MBP_HUMAN(pre=K,post=A);sp|P02686-6|MBP_HUMAN(pre=K,post=A)	2	705.332	1	1	4	5	10	3	2	5	0	0.999985	1	Valid
679	20160312_12_A11.10522.10522.2 File:"20160312_12_A11.raw", NativeID:"controllerType=0 controllerNumber=1 scan=10522"	GAEGQR+0.984PGFGYGGR	GAEGQrPGFGYGGR	tr|H7BYR8|H7BYR8_HUMAN(pre=K,post=A);sp|P02686-4|MBP_HUMAN(pre=K,post=A);sp|P02686-6|MBP_HUMAN(pre=K,post=A)	2	705.332	1	1	7	8	16	3	4	7	0	1	1	Valid
680	20160312_12_A11.10583.10583.2 File:"20160312_12_A11.raw", NativeID:"controllerType=0 controllerNumber=1 scan=10583"	LSPSPSSR+0.984VTVSR	LSPSPSSrVTVSR	sp|P20700|LMNB1_HUMAN(pre=K,post=A);sp|Q03252|LMNB2_HUMAN(pre=K,post=A)	2	687.373	1	0	12	1	13	0	1	1	0	0.999989	1	Valid
681	20160312_12_A11.10963.10963.2 File:"20160312_12_A11.raw", NativeID:"controllerType=0 controllerNumber=1 scan=10963"	IPLSGSNQEIR+0.984R	IPLSGSNQEIrR	sp|Q8TAM6|ERMIN_HUMAN(pre=K,post=Q);sp|Q8TAM6-2|ERMIN_HUMAN(pre=K,post=Q);tr|B4DIZ1|B4DIZ1_HUMAN(pre=K,post=Q);tr|C9J6B4|C9J6B4_HUMAN(pre=K,post=Q);tr|C9JN04|C9JN04_HUMAN(pre=K,post=Q)	2	685.874	1	1	9	0	10	0	0	0	0	0.999603	1	Valid
682	20160312_12_A11.11179.11179.2 File:"20160312_12_A11.raw", NativeID:"controllerType=0 controllerNumber=1 scan=11179"	N+0.984IVTPR+0.984TPPPSQGK	nIVTPrTPPPSQGK	tr|H7BYR8|H7BYR8_HUMAN(pre=K,post=G);sp|P02686|MBP_HUMAN(pre=K,post=G);sp|P02686-3|MBP_HUMAN(pre=K,post=G);sp|P02686-4|MBP_HUMAN(pre=K,post=G);sp|P02686-5|MBP_HUMAN(pre=K,post=G);sp|P02686-6|MBP_HUMAN(pre=K,post=G);tr|C9J6H1|C9J6H1_HUMAN(pre=K,post=G);tr|J3QL64|J3QL64_HUMAN(pre=K,post=G);tr|E9PJ72|E9PJ72_HUMAN(pre=K,post=G);tr|J3QKL5|J3QKL5_HUMAN(pre=K,post=G);tr|J3KT01|J3KT01_HUMAN(pre=K,post=G)…	2	747.402	1	0	2	2	4	2	2	4	0	0.989891	1	Valid
683	20160312_12_A11.11627.11627.2 File:"20160312_12_A11.raw", NativeID:"controllerType=0 controllerNumber=1 scan=11627"	RN+0.984R+0.984SR+0.984RR+0.984R+0.984FR	RnrSrRrrFR	tr|H7C4S4|H7C4S4_HUMAN(pre=R,post=G)	2	732.899	4	0	1	0	1	2	0	2	0	0.587272	1	Ambiguous
684	20160312_12_A11.12338.12338.2 File:"20160312_12_A11.raw", NativeID:"controllerType=0 controllerNumber=1 scan=12338"	TSVSSVSASPSR+0.984FR	TSVSSVSASPSrFR	sp|P12036|NFH_HUMAN(pre=R,post=G);sp|P12036-2|NFH_HUMAN(pre=R,post=G)	2	734.874	1	0	8	3	11	0	2	2	0	0.999959	1	Valid
685	20160312_12_A11.12367.12367.2 File:"20160312_12_A11.raw", NativeID:"controllerType=0 controllerNumber=1 scan=12367"	LSGAGGAGGFR+0.984SQSLSR	LSGAGGAGGFrSQSLSR	sp|Q16352|AINX_HUMAN(pre=R,post=S)	2	804.909	1	1	19	4	24	1	5	6	0	1	1	Valid
686	20160312_12_A11.13210.13210.2 File:"20160312_12_A11.raw", NativeID:"controllerType=0 controllerNumber=1 scan=13210"	DLAVR+0.984LQ+0.984HSLQ+0.984R	DLAVrLqHSLqR	sp|A6NMD2|GOG8J_HUMAN(pre=K,post=K);sp|A6NN73|GOG8C_HUMAN(pre=K,post=K);sp|D6RF30|GOG8K_HUMAN(pre=K,post=K);sp|H3BSY2|GOG8M_HUMAN(pre=K,post=K);sp|H3BSY2-2|GOG8M_HUMAN(pre=K,post=K);sp|H3BPF8|GOG8S_HUMAN(pre=K,post=K);sp|H3BQL2|GOG8T_HUMAN(pre=K,post=K);sp|A6NC78|GOG8I_HUMAN(pre=K,post=K);tr|A0A1W2PQV4|A0A1W2PQV4_HUMAN(pre=K,post=K);tr|A0A1W2PRN1|A0A1W2PRN1_HUMAN(pre=K,post=K);tr|A0A1B0GVY7|A0A1B…	2	719.887	1	0	1	0	1	1	0	1	0	0.425753	0	Valid
687	20160312_12_A11.13396.13396.3 File:"20160312_12_A11.raw", NativeID:"controllerType=0 controllerNumber=1 scan=13396"	YLATASTM+15.995DHAR+0.984HGFLPR	YLATASTmDHArHGFLPR	tr|H7BYR8|H7BYR8_HUMAN(pre=K,post=H);sp|P02686|MBP_HUMAN(pre=K,post=H);sp|P02686-2|MBP_HUMAN(pre=K,post=H);sp|P02686-3|MBP_HUMAN(pre=K,post=H);sp|P02686-4|MBP_HUMAN(pre=K,post=H);sp|P02686-5|MBP_HUMAN(pre=K,post=H);sp|P02686-6|MBP_HUMAN(pre=K,post=H);tr|E9PLQ9|E9PLQ9_HUMAN(pre=K,post=T);tr|E9PKX9|E9PKX9_HUMAN(pre=K,post=H);tr|J3QL64|J3QL64_HUMAN(pre=K,post=H);tr|J3KT34|J3KT34_HUMAN(pre=K,post=H);…	3	687.671	1	0	4	0	4	0	0	0	0	0.878318	1	Valid
688	20160312_12_A11.13420.13420.2 File:"20160312_12_A11.raw", NativeID:"controllerType=0 controllerNumber=1 scan=13420"	SSFSR+0.984VSGSPSSGFR	SSFSrVSGSPSSGFR	sp|P07197|NFM_HUMAN(pre=R,post=S);tr|E7EMV2|E7EMV2_HUMAN(pre=R,post=S);tr|E7ESP9|E7ESP9_HUMAN(pre=R,post=S)	2	773.369	1	0	4	1	5	3	1	4	0	0.996166	1	Valid
689	20160312_12_A11.13434.13434.4 File:"20160312_12_A11.raw", NativeID:"controllerType=0 controllerNumber=1 scan=13434"	YLATASTM+15.995DHAR+0.984HGFLPR	YLATASTmDHArHGFLPR	tr|H7BYR8|H7BYR8_HUMAN(pre=K,post=H);sp|P02686|MBP_HUMAN(pre=K,post=H);sp|P02686-2|MBP_HUMAN(pre=K,post=H);sp|P02686-3|MBP_HUMAN(pre=K,post=H);sp|P02686-4|MBP_HUMAN(pre=K,post=H);sp|P02686-5|MBP_HUMAN(pre=K,post=H);sp|P02686-6|MBP_HUMAN(pre=K,post=H);tr|E9PLQ9|E9PLQ9_HUMAN(pre=K,post=T);tr|E9PKX9|E9PKX9_HUMAN(pre=K,post=H);tr|J3QL64|J3QL64_HUMAN(pre=K,post=H);tr|J3KT34|J3KT34_HUMAN(pre=K,post=H);…	4	516.005	1	0	6	3	9	0	1	1	0	0.999452	1	Valid
690	20160312_12_A11.13443.13443.2 File:"20160312_12_A11.raw", NativeID:"controllerType=0 controllerNumber=1 scan=13443"	YLATASTM+15.995DHAR+0.984HGFLPR	YLATASTmDHArHGFLPR	tr|H7BYR8|H7BYR8_HUMAN(pre=K,post=H);sp|P02686|MBP_HUMAN(pre=K,post=H);sp|P02686-2|MBP_HUMAN(pre=K,post=H);sp|P02686-3|MBP_HUMAN(pre=K,post=H);sp|P02686-4|MBP_HUMAN(pre=K,post=H);sp|P02686-5|MBP_HUMAN(pre=K,post=H);sp|P02686-6|MBP_HUMAN(pre=K,post=H);tr|E9PLQ9|E9PLQ9_HUMAN(pre=K,post=T);tr|E9PKX9|E9PKX9_HUMAN(pre=K,post=H);tr|J3QL64|J3QL64_HUMAN(pre=K,post=H);tr|J3KT34|J3KT34_HUMAN(pre=K,post=H);…	2	1031	1	0	5	0	5	0	0	0	0	0.950382	1	Valid
691	20160312_12_A11.13498.13498.2 File:"20160312_12_A11.raw", NativeID:"controllerType=0 controllerNumber=1 scan=13498"	VSGSPSSGFR+0.984SQSWSR	VSGSPSSGFrSQSWSR	sp|P07197|NFM_HUMAN(pre=R,post=G);tr|E7EMV2|E7EMV2_HUMAN(pre=R,post=G);tr|E7ESP9|E7ESP9_HUMAN(pre=R,post=G)	2	856.904	1	2	14	2	18	0	0	0	0	1	1	Valid
692	20160312_12_A11.13562.13562.3 File:"20160312_12_A11.raw", NativeID:"controllerType=0 controllerNumber=1 scan=13562"	YLATASTM+15.995DHAR+0.984HGFLPR	YLATASTmDHArHGFLPR	tr|H7BYR8|H7BYR8_HUMAN(pre=K,post=H);sp|P02686|MBP_HUMAN(pre=K,post=H);sp|P02686-2|MBP_HUMAN(pre=K,post=H);sp|P02686-3|MBP_HUMAN(pre=K,post=H);sp|P02686-4|MBP_HUMAN(pre=K,post=H);sp|P02686-5|MBP_HUMAN(pre=K,post=H);sp|P02686-6|MBP_HUMAN(pre=K,post=H);tr|E9PLQ9|E9PLQ9_HUMAN(pre=K,post=T);tr|E9PKX9|E9PKX9_HUMAN(pre=K,post=H);tr|J3QL64|J3QL64_HUMAN(pre=K,post=H);tr|J3KT34|J3KT34_HUMAN(pre=K,post=H);…	3	687.671	1	0	0	0	0	0	0	0	0	0.127083	0	Ambiguous
693	20160312_12_A11.13584.13584.2 File:"20160312_12_A11.raw", NativeID:"controllerType=0 controllerNumber=1 scan=13584"	SSFSR+0.984VSGSPSSGFR	SSFSrVSGSPSSGFR	sp|P07197|NFM_HUMAN(pre=R,post=S);tr|E7EMV2|E7EMV2_HUMAN(pre=R,post=S);tr|E7ESP9|E7ESP9_HUMAN(pre=R,post=S)	2	773.369	1	0	2	2	4	2	0	2	0	0.96375	1	Valid
694	20160312_12_A11.13676.13676.2 File:"20160312_12_A11.raw", NativeID:"controllerType=0 controllerNumber=1 scan=13676"	VSGSPSSGFR+0.984SQSWSR	VSGSPSSGFrSQSWSR	sp|P07197|NFM_HUMAN(pre=R,post=G);tr|E7EMV2|E7EMV2_HUMAN(pre=R,post=G);tr|E7ESP9|E7ESP9_HUMAN(pre=R,post=G)	2	856.904	1	0	3	1	4	0	0	0	0	0.878318	1	Valid
695	20160312_12_A11.13825.13825.2 File:"20160312_12_A11.raw", NativeID:"controllerType=0 controllerNumber=1 scan=13825"	ANER+0.984C+57.021WAAESPEK	ANErcWAAESPEK	sp|Q8NEV4|MYO3A_HUMAN(pre=K,post=E)	2	774.842	1	0	1	0	1	0	0	0	0	0.278664	0	Valid
696	20160312_12_A11.13848.13848.3 File:"20160312_12_A11.raw", NativeID:"controllerType=0 controllerNumber=1 scan=13848"	YLATASTM+15.995DHAR+0.984HGFLPR	YLATASTmDHArHGFLPR	tr|H7BYR8|H7BYR8_HUMAN(pre=K,post=H);sp|P02686|MBP_HUMAN(pre=K,post=H);sp|P02686-2|MBP_HUMAN(pre=K,post=H);sp|P02686-3|MBP_HUMAN(pre=K,post=H);sp|P02686-4|MBP_HUMAN(pre=K,post=H);sp|P02686-5|MBP_HUMAN(pre=K,post=H);sp|P02686-6|MBP_HUMAN(pre=K,post=H);tr|E9PLQ9|E9PLQ9_HUMAN(pre=K,post=T);tr|E9PKX9|E9PKX9_HUMAN(pre=K,post=H);tr|J3QL64|J3QL64_HUMAN(pre=K,post=H);tr|J3KT34|J3KT34_HUMAN(pre=K,post=H);…	3	687.671	1	0	1	0	1	0	0	0	0	0.278664	0	Ambiguous
697	20160312_12_A11.14041.14041.2 File:"20160312_12_A11.raw", NativeID:"controllerType=0 controllerNumber=1 scan=14041"	LSR+0.984LATNTSAPDLK	LSrLATNTSAPDLK	sp|P27816|MAP4_HUMAN(pre=R,post=N);sp|P27816-2|MAP4_HUMAN(pre=R,post=N);sp|P27816-4|MAP4_HUMAN(pre=R,post=N);sp|P27816-5|MAP4_HUMAN(pre=R,post=N);sp|P27816-6|MAP4_HUMAN(pre=R,post=N);tr|H7C4C5|H7C4C5_HUMAN(pre=R,post=N);tr|B5MEG9|B5MEG9_HUMAN(pre=R,post=N);tr|H0Y2V1|H0Y2V1_HUMAN(pre=R,post=N);tr|F8W9U4|F8W9U4_HUMAN(pre=R,post=N);tr|E7EVA0|E7EVA0_HUMAN(pre=R,post=N)	2	744.407	1	0	4	2	6	5	0	5	0	0.999245	1	Valid
698	20160312_12_A11.14059.14059.2 File:"20160312_12_A11.raw", NativeID:"controllerType=0 controllerNumber=1 scan=14059"	YVETPR+0.984VHISSVR	YVETPrVHISSVR	sp|P07196|NFL_HUMAN(pre=R,post=S);tr|A0A0S2Z436|A0A0S2Z436_HUMAN(pre=R,post=S);tr|A0A087X0W2|A0A087X0W2_HUMAN(pre=R,post=S)	2	772.416	1	2	17	2	21	2	2	4	0	1	1	Valid
699	20160312_12_A11.14257.14257.2 File:"20160312_12_A11.raw", NativeID:"controllerType=0 controllerNumber=1 scan=14257"	QVSGPER+0.984TIPITR	QVSGPErTIPITR	sp|P02511|CRYAB_HUMAN(pre=K,post=E);tr|A0A024R3B9|A0A024R3B9_HUMAN(pre=K,post=E);tr|E9PR44|E9PR44_HUMAN(pre=K,post=E);tr|E9PNH7|E9PNH7_HUMAN(pre=K,post=E);tr|H0YCW8|H0YCW8_HUMAN(pre=K,post=E)	2	727.902	1	2	13	1	16	0	1	1	0	0.999999	1	Valid
700	20160312_12_A11.14305.14305.2 File:"20160312_12_A11.raw", NativeID:"controllerType=0 controllerNumber=1 scan=14305"	ITPGAR+0.984GAFSEEYK	ITPGArGAFSEEYK	tr|K7ERC4|K7ERC4_HUMAN(pre=K,post=R);tr|C9K0L8|C9K0L8_HUMAN(pre=K,post=R);tr|K7ERZ0|K7ERZ0_HUMAN(pre=K,post=R);tr|K7EN66|K7EN66_HUMAN(pre=K,post=R);sp|P09543|CN37_HUMAN(pre=K,post=R);sp|P09543-2|CN37_HUMAN(pre=K,post=R)	2	763.878	1	0	4	4	8	1	1	2	0	0.999242	1	Valid
701	20160312_12_A11.14703.14703.3 File:"20160312_12_A11.raw", NativeID:"controllerType=0 controllerNumber=1 scan=14703"	RKWEVFPGRN+0.984KFFC+57.021NGR+0.984IMMAR	RKWEVFPGRnKFFcNGrIMMAR	sp|Q8IZN3|ZDH14_HUMAN(pre=R,post=Q);sp|Q8IZN3-2|ZDH14_HUMAN(pre=R,post=Q)	3	934.802	1	0	2	0	2	0	0	0	0	0.5062	1	Valid
702	20160312_12_A11.15101.15101.2 File:"20160312_12_A11.raw", NativeID:"controllerType=0 controllerNumber=1 scan=15101"	TWASR+0.984PQVPEPR	TWASrPQVPEPR	sp|O43236|SEPT4_HUMAN(pre=K,post=P);sp|O43236-2|SEPT4_HUMAN(pre=K,post=P);sp|O43236-3|SEPT4_HUMAN(pre=K,post=P);sp|O43236-4|SEPT4_HUMAN(pre=K,post=P);sp|O43236-6|SEPT4_HUMAN(pre=K,post=P);tr|J3QRS4|J3QRS4_HUMAN(pre=K,post=P);tr|J3QLA8|J3QLA8_HUMAN(pre=K,post=P)	2	712.868	1	0	2	1	3	1	0	1	0	0.839242	1	Valid
703	20160312_12_A11.15387.15387.2 File:"20160312_12_A11.raw", NativeID:"controllerType=0 controllerNumber=1 scan=15387"	SSAVR+0.984LR+0.984SSVPGVR	SSAVrLrSSVPGVR	sp|P08670|VIME_HUMAN(pre=R,post=L);tr|B0YJC4|B0YJC4_HUMAN(pre=R,post=L);tr|A0A1B0GVG8|A0A1B0GVG8_HUMAN(pre=R,post=L);tr|A0A1B0GTT5|A0A1B0GTT5_HUMAN(pre=R,post=L)	2	736.913	2	2	3	2	7	3	0	3	0	0.998952	1	Valid
704	20160312_12_A11.1541.1541.2 File:"20160312_12_A11.raw", NativeID:"controllerType=0 controllerNumber=1 scan=1541"	R+0.984ITSAAR	rITSAAR	sp|P14136|GFAP_HUMAN(pre=R,post=R);sp|P14136-2|GFAP_HUMAN(pre=R,post=R);sp|P14136-3|GFAP_HUMAN(pre=R,post=R);tr|B4DIR1|B4DIR1_HUMAN(pre=R,post=R);tr|K7ELP4|K7ELP4_HUMAN(pre=R,post=R);tr|K7EMP8|K7EMP8_HUMAN(pre=R,post=R);tr|K7EKH9|K7EKH9_HUMAN(pre=R,post=R);tr|A0A1X7SCE1|A0A1X7SCE1_HUMAN(pre=R,post=R);tr|A0A1X7SBR3|A0A1X7SBR3_HUMAN(pre=R,post=R);tr|A0A1W2PR46|A0A1W2PR46_HUMAN(pre=R,post=R);tr|K7EJ…	2	388.225	1	0	0	0	0	0	0	0	0	0.127083	0	Valid
705	20160312_12_A11.15440.15440.2 File:"20160312_12_A11.raw", NativeID:"controllerType=0 controllerNumber=1 scan=15440"	AISSPTVSR+0.984LTDTTK	AISSPTVSrLTDTTK	sp|O94811|TPPP_HUMAN(pre=K,post=F)	2	789.423	1	0	5	0	5	0	0	0	0	0.950382	1	Valid
706	20160312_12_A11.15535.15535.3 File:"20160312_12_A11.raw", NativeID:"controllerType=0 controllerNumber=1 scan=15535"	YLATASTMDHAR+0.984HGFLPR	YLATASTMDHArHGFLPR	tr|H7BYR8|H7BYR8_HUMAN(pre=K,post=H);sp|P02686|MBP_HUMAN(pre=K,post=H);sp|P02686-2|MBP_HUMAN(pre=K,post=H);sp|P02686-3|MBP_HUMAN(pre=K,post=H);sp|P02686-4|MBP_HUMAN(pre=K,post=H);sp|P02686-5|MBP_HUMAN(pre=K,post=H);sp|P02686-6|MBP_HUMAN(pre=K,post=H);tr|E9PLQ9|E9PLQ9_HUMAN(pre=K,post=T);tr|E9PKX9|E9PKX9_HUMAN(pre=K,post=H);tr|J3QL64|J3QL64_HUMAN(pre=K,post=H);tr|J3KT34|J3KT34_HUMAN(pre=K,post=H);…	3	682.339	1	0	2	0	2	0	0	0	0	0.5062	1	Valid
707	20160312_12_A11.15542.15542.2 File:"20160312_12_A11.raw", NativeID:"controllerType=0 controllerNumber=1 scan=15542"	LER+0.984PVIYIDQTR	LErPVIYIDQTR	sp|P27338|AOFB_HUMAN(pre=K,post=E);sp|P27338-2|AOFB_HUMAN(pre=K,post=E)	2	752.412	1	1	1	1	3	2	0	2	0	0.909249	1	Valid
708	20160312_12_A11.16033.16033.2 File:"20160312_12_A11.raw", NativeID:"controllerType=0 controllerNumber=1 scan=16033"	SR+0.984FTVLTESAAK	SrFTVLTESAAK	sp|P07196|NFL_HUMAN(pre=K,post=N)	2	655.852	1	0	1	0	1	0	0	0	0	0.278664	0	Valid
709	20160312_12_A11.16263.16263.4 File:"20160312_12_A11.raw", NativeID:"controllerType=0 controllerNumber=1 scan=16263"	YLATASTMDHAR+0.984HGFLPR	YLATASTMDHArHGFLPR	tr|H7BYR8|H7BYR8_HUMAN(pre=K,post=H);sp|P02686|MBP_HUMAN(pre=K,post=H);sp|P02686-2|MBP_HUMAN(pre=K,post=H);sp|P02686-3|MBP_HUMAN(pre=K,post=H);sp|P02686-4|MBP_HUMAN(pre=K,post=H);sp|P02686-5|MBP_HUMAN(pre=K,post=H);sp|P02686-6|MBP_HUMAN(pre=K,post=H);tr|E9PLQ9|E9PLQ9_HUMAN(pre=K,post=T);tr|E9PKX9|E9PKX9_HUMAN(pre=K,post=H);tr|J3QL64|J3QL64_HUMAN(pre=K,post=H);tr|J3KT34|J3KT34_HUMAN(pre=K,post=H);…	4	512.007	1	0	5	3	8	0	1	1	0	0.998546	1	Valid
710	20160312_12_A11.16264.16264.3 File:"20160312_12_A11.raw", NativeID:"controllerType=0 controllerNumber=1 scan=16264"	YLATASTMDHAR+0.984HGFLPR	YLATASTMDHArHGFLPR	tr|H7BYR8|H7BYR8_HUMAN(pre=K,post=H);sp|P02686|MBP_HUMAN(pre=K,post=H);sp|P02686-2|MBP_HUMAN(pre=K,post=H);sp|P02686-3|MBP_HUMAN(pre=K,post=H);sp|P02686-4|MBP_HUMAN(pre=K,post=H);sp|P02686-5|MBP_HUMAN(pre=K,post=H);sp|P02686-6|MBP_HUMAN(pre=K,post=H);tr|E9PLQ9|E9PLQ9_HUMAN(pre=K,post=T);tr|E9PKX9|E9PKX9_HUMAN(pre=K,post=H);tr|J3QL64|J3QL64_HUMAN(pre=K,post=H);tr|J3KT34|J3KT34_HUMAN(pre=K,post=H);…	3	682.339	1	0	9	3	12	0	1	1	0	0.999971	1	Valid
711	20160312_12_A11.16517.16517.3 File:"20160312_12_A11.raw", NativeID:"controllerType=0 controllerNumber=1 scan=16517"	YLATASTMDHAR+0.984HGFLPR	YLATASTMDHArHGFLPR	tr|H7BYR8|H7BYR8_HUMAN(pre=K,post=H);sp|P02686|MBP_HUMAN(pre=K,post=H);sp|P02686-2|MBP_HUMAN(pre=K,post=H);sp|P02686-3|MBP_HUMAN(pre=K,post=H);sp|P02686-4|MBP_HUMAN(pre=K,post=H);sp|P02686-5|MBP_HUMAN(pre=K,post=H);sp|P02686-6|MBP_HUMAN(pre=K,post=H);tr|E9PLQ9|E9PLQ9_HUMAN(pre=K,post=T);tr|E9PKX9|E9PKX9_HUMAN(pre=K,post=H);tr|J3QL64|J3QL64_HUMAN(pre=K,post=H);tr|J3KT34|J3KT34_HUMAN(pre=K,post=H);…	3	682.339	1	0	10	4	14	0	1	1	0	0.999996	1	Valid
712	20160312_12_A11.16616.16616.3 File:"20160312_12_A11.raw", NativeID:"controllerType=0 controllerNumber=1 scan=16616"	YVETPR+0.984VHISSVR+0.984SGYSTAR	YVETPrVHISSVrSGYSTAR	sp|P07196|NFL_HUMAN(pre=R,post=S);tr|A0A0S2Z436|A0A0S2Z436_HUMAN(pre=R,post=S);tr|A0A087X0W2|A0A087X0W2_HUMAN(pre=R,post=S)	3	756.386	2	0	10	2	12	2	1	3	0	0.999992	1	Valid
713	20160312_12_A11.16635.16635.2 File:"20160312_12_A11.raw", NativeID:"controllerType=0 controllerNumber=1 scan=16635"	TTTLSGTAPAAGVVPSR+0.984VK	TTTLSGTAPAAGVVPSrVK	sp|P27816|MAP4_HUMAN(pre=K,post=A);sp|P27816-2|MAP4_HUMAN(pre=K,post=A);sp|P27816-4|MAP4_HUMAN(pre=K,post=A);sp|P27816-5|MAP4_HUMAN(pre=K,post=A);sp|P27816-6|MAP4_HUMAN(pre=K,post=A);tr|H7C4C5|H7C4C5_HUMAN(pre=K,post=A);tr|B5MEG9|B5MEG9_HUMAN(pre=K,post=A);tr|H0Y2V1|H0Y2V1_HUMAN(pre=K,post=A);tr|F8W9U4|F8W9U4_HUMAN(pre=K,post=A);tr|E7EVA0|E7EVA0_HUMAN(pre=K,post=A)	2	907.505	1	0	3	0	3	0	1	1	0	0.839242	1	Valid
714	20160312_12_A11.16671.16671.4 File:"20160312_12_A11.raw", NativeID:"controllerType=0 controllerNumber=1 scan=16671"	YLATASTMDHAR+0.984HGFLPR	YLATASTMDHArHGFLPR	tr|H7BYR8|H7BYR8_HUMAN(pre=K,post=H);sp|P02686|MBP_HUMAN(pre=K,post=H);sp|P02686-2|MBP_HUMAN(pre=K,post=H);sp|P02686-3|MBP_HUMAN(pre=K,post=H);sp|P02686-4|MBP_HUMAN(pre=K,post=H);sp|P02686-5|MBP_HUMAN(pre=K,post=H);sp|P02686-6|MBP_HUMAN(pre=K,post=H);tr|E9PLQ9|E9PLQ9_HUMAN(pre=K,post=T);tr|E9PKX9|E9PKX9_HUMAN(pre=K,post=H);tr|J3QL64|J3QL64_HUMAN(pre=K,post=H);tr|J3KT34|J3KT34_HUMAN(pre=K,post=H);…	4	512.007	1	0	5	3	8	0	1	1	0	0.998546	1	Valid
715	20160312_12_A11.16696.16696.3 File:"20160312_12_A11.raw", NativeID:"controllerType=0 controllerNumber=1 scan=16696"	YLATASTMDHAR+0.984HGFLPR	YLATASTMDHArHGFLPR	tr|H7BYR8|H7BYR8_HUMAN(pre=K,post=H);sp|P02686|MBP_HUMAN(pre=K,post=H);sp|P02686-2|MBP_HUMAN(pre=K,post=H);sp|P02686-3|MBP_HUMAN(pre=K,post=H);sp|P02686-4|MBP_HUMAN(pre=K,post=H);sp|P02686-5|MBP_HUMAN(pre=K,post=H);sp|P02686-6|MBP_HUMAN(pre=K,post=H);tr|E9PLQ9|E9PLQ9_HUMAN(pre=K,post=T);tr|E9PKX9|E9PKX9_HUMAN(pre=K,post=H);tr|J3QL64|J3QL64_HUMAN(pre=K,post=H);tr|J3KT34|J3KT34_HUMAN(pre=K,post=H);…	3	682.339	1	0	12	7	19	0	1	1	0	1	1	Valid
716	20160312_12_A11.16716.16716.2 File:"20160312_12_A11.raw", NativeID:"controllerType=0 controllerNumber=1 scan=16716"	YLATASTMDHAR+0.984HGFLPR	YLATASTMDHArHGFLPR	tr|H7BYR8|H7BYR8_HUMAN(pre=K,post=H);sp|P02686|MBP_HUMAN(pre=K,post=H);sp|P02686-2|MBP_HUMAN(pre=K,post=H);sp|P02686-3|MBP_HUMAN(pre=K,post=H);sp|P02686-4|MBP_HUMAN(pre=K,post=H);sp|P02686-5|MBP_HUMAN(pre=K,post=H);sp|P02686-6|MBP_HUMAN(pre=K,post=H);tr|E9PLQ9|E9PLQ9_HUMAN(pre=K,post=T);tr|E9PKX9|E9PKX9_HUMAN(pre=K,post=H);tr|J3QL64|J3QL64_HUMAN(pre=K,post=H);tr|J3KT34|J3KT34_HUMAN(pre=K,post=H);…	2	1023.01	1	2	7	4	13	0	1	1	0	0.999989	1	Valid
717	20160312_12_A11.16771.16771.2 File:"20160312_12_A11.raw", NativeID:"controllerType=0 controllerNumber=1 scan=16771"	FANLNEQAAR+0.984STEAIR	FANLNEQAArSTEAIR	sp|Q16352|AINX_HUMAN(pre=K,post=A)	2	896.453	1	0	7	0	7	0	0	0	0	0.99264	1	Valid
718	20160312_12_A11.16855.16855.4 File:"20160312_12_A11.raw", NativeID:"controllerType=0 controllerNumber=1 scan=16855"	YLATASTMDHAR+0.984HGFLPR	YLATASTMDHArHGFLPR	tr|H7BYR8|H7BYR8_HUMAN(pre=K,post=H);sp|P02686|MBP_HUMAN(pre=K,post=H);sp|P02686-2|MBP_HUMAN(pre=K,post=H);sp|P02686-3|MBP_HUMAN(pre=K,post=H);sp|P02686-4|MBP_HUMAN(pre=K,post=H);sp|P02686-5|MBP_HUMAN(pre=K,post=H);sp|P02686-6|MBP_HUMAN(pre=K,post=H);tr|E9PLQ9|E9PLQ9_HUMAN(pre=K,post=T);tr|E9PKX9|E9PKX9_HUMAN(pre=K,post=H);tr|J3QL64|J3QL64_HUMAN(pre=K,post=H);tr|J3KT34|J3KT34_HUMAN(pre=K,post=H);…	4	512.007	1	0	3	1	4	0	0	0	0	0.878318	1	Valid
719	20160312_12_A11.16927.16927.2 File:"20160312_12_A11.raw", NativeID:"controllerType=0 controllerNumber=1 scan=16927"	SR+0.984LQTAPVPM+15.995PDLK	SrLQTAPVPmPDLK	sp|P10636|TAU_HUMAN(pre=K,post=N);sp|P10636-2|TAU_HUMAN(pre=K,post=N);sp|P10636-3|TAU_HUMAN(pre=K,post=N);sp|P10636-4|TAU_HUMAN(pre=K,post=N);sp|P10636-5|TAU_HUMAN(pre=K,post=N);sp|P10636-6|TAU_HUMAN(pre=K,post=N);sp|P10636-7|TAU_HUMAN(pre=K,post=N);sp|P10636-8|TAU_HUMAN(pre=K,post=N);sp|P10636-9|TAU_HUMAN(pre=K,post=N);tr|I3L170|I3L170_HUMAN(pre=K,post=N);tr|A0A0G2JMX7|A0A0G2JMX7_HUMAN(pre=K,pos…	2	785.419	1	0	1	0	1	0	0	0	0	0.278664	0	Valid
720	20160312_12_A11.16930.16930.2 File:"20160312_12_A11.raw", NativeID:"controllerType=0 controllerNumber=1 scan=16930"	SNLR+0.984SLADIGK	SNLrSLADIGK	sp|Q9Y6R1|S4A4_HUMAN(pre=K,post=T);sp|Q9Y6R1-2|S4A4_HUMAN(pre=K,post=T);sp|Q9Y6R1-3|S4A4_HUMAN(pre=K,post=T);sp|Q9Y6R1-4|S4A4_HUMAN(pre=K,post=T);sp|Q9Y6R1-5|S4A4_HUMAN(pre=K,post=T)	2	587.826	1	0	4	3	7	2	1	3	0	0.998952	1	Valid
721	20160312_12_A11.18386.18386.2 File:"20160312_12_A11.raw", NativeID:"controllerType=0 controllerNumber=1 scan=18386"	SSFSR+0.984VSGSPSSGFR+0.984SQSWSR	SSFSrVSGSPSSGFrSQSWSR	sp|P07197|NFM_HUMAN(pre=R,post=G);tr|E7EMV2|E7EMV2_HUMAN(pre=R,post=G);tr|E7ESP9|E7ESP9_HUMAN(pre=R,post=G)	2	1139.53	2	0	3	1	4	0	2	2	0	0.96375	1	Valid
722	20160312_12_A11.18399.18399.3 File:"20160312_12_A11.raw", NativeID:"controllerType=0 controllerNumber=1 scan=18399"	SSFSRVSGSPSSGFR+0.984SQSWSR	SSFSRVSGSPSSGFrSQSWSR	sp|P07197|NFM_HUMAN(pre=R,post=G);tr|E7EMV2|E7EMV2_HUMAN(pre=R,post=G);tr|E7ESP9|E7ESP9_HUMAN(pre=R,post=G)	3	759.693	1	0	3	1	4	0	0	0	0	0.878318	1	Valid
723	20160312_12_A11.19582.19582.3 File:"20160312_12_A11.raw", NativeID:"controllerType=0 controllerNumber=1 scan=19582"	FSWGAEGQRPGFGYGGR+0.984ASDYK	FSWGAEGQRPGFGYGGrASDYK	sp|P02686|MBP_HUMAN(pre=R,post=S);sp|P02686-3|MBP_HUMAN(pre=R,post=S);sp|P02686-5|MBP_HUMAN(pre=R,post=S);tr|C9J6H1|C9J6H1_HUMAN(pre=R,post=S);tr|J3QL64|J3QL64_HUMAN(pre=R,post=S);tr|E9PJ72|E9PJ72_HUMAN(pre=R,post=S);tr|A8MZH3|A8MZH3_HUMAN(pre=R,post=S)	3	798.702	1	0	4	0	4	0	0	0	0	0.878318	1	Valid
724	20160312_12_A11.19589.19589.2 File:"20160312_12_A11.raw", NativeID:"controllerType=0 controllerNumber=1 scan=19589"	FSWGAEGQRPGFGYGGR+0.984ASDYK	FSWGAEGQRPGFGYGGrASDYK	sp|P02686|MBP_HUMAN(pre=R,post=S);sp|P02686-3|MBP_HUMAN(pre=R,post=S);sp|P02686-5|MBP_HUMAN(pre=R,post=S);tr|C9J6H1|C9J6H1_HUMAN(pre=R,post=S);tr|J3QL64|J3QL64_HUMAN(pre=R,post=S);tr|E9PJ72|E9PJ72_HUMAN(pre=R,post=S);tr|A8MZH3|A8MZH3_HUMAN(pre=R,post=S)	2	1197.55	1	1	0	0	1	0	0	0	0	0.278664	0	Valid
725	20160312_12_A11.19720.19720.3 File:"20160312_12_A11.raw", NativeID:"controllerType=0 controllerNumber=1 scan=19720"	NVLGHMQQGGSPTPFDR+0.984NFATK	NVLGHMQQGGSPTPFDrNFATK	sp|P08237|PFKAM_HUMAN(pre=K,post=M);sp|P08237-2|PFKAM_HUMAN(pre=K,post=M);sp|P08237-3|PFKAM_HUMAN(pre=K,post=M);tr|A0A2R8Y891|A0A2R8Y891_HUMAN(pre=K,post=M);tr|F8VZI0|F8VZI0_HUMAN(pre=K,post=M)	3	801.722	1	0	2	0	2	0	0	0	0	0.5062	1	Valid
726	20160312_12_A11.19768.19768.2 File:"20160312_12_A11.raw", NativeID:"controllerType=0 controllerNumber=1 scan=19768"	VTAEVVLAHLGGGSTSR+0.984	VTAEVVLAHLGGGSTSr	sp|P04843|RPN1_HUMAN(pre=K,post=A);tr|F8WF32|F8WF32_HUMAN(pre=K,post=A)	2	827.942	1	0	0	0	0	0	0	0	0	0.127083	0	Ambiguous
727	20160312_12_A11.19782.19782.3 File:"20160312_12_A11.raw", NativeID:"controllerType=0 controllerNumber=1 scan=19782"	FSWGAEGQRPGFGYGGR+0.984ASDYK	FSWGAEGQRPGFGYGGrASDYK	sp|P02686|MBP_HUMAN(pre=R,post=S);sp|P02686-3|MBP_HUMAN(pre=R,post=S);sp|P02686-5|MBP_HUMAN(pre=R,post=S);tr|C9J6H1|C9J6H1_HUMAN(pre=R,post=S);tr|J3QL64|J3QL64_HUMAN(pre=R,post=S);tr|E9PJ72|E9PJ72_HUMAN(pre=R,post=S);tr|A8MZH3|A8MZH3_HUMAN(pre=R,post=S)	3	798.702	1	0	2	0	2	0	0	0	0	0.5062	1	Valid
728	20160312_12_A11.20580.20580.2 File:"20160312_12_A11.raw", NativeID:"controllerType=0 controllerNumber=1 scan=20580"	QSFTTVADTPENLR+0.984LK	QSFTTVADTPENLrLK	sp|O76041-2|NEBL_HUMAN(pre=K,post=Q)	2	910.974	1	1	7	2	10	0	0	0	0	0.999603	1	Valid
729	20160312_12_A11.20698.20698.3 File:"20160312_12_A11.raw", NativeID:"controllerType=0 controllerNumber=1 scan=20698"	VPPPPPIAR+0.984AVVPSK	VPPPPPIArAVVPSK	sp|P07910|HNRPC_HUMAN(pre=R,post=R);sp|P07910-2|HNRPC_HUMAN(pre=R,post=R);sp|P07910-3|HNRPC_HUMAN(pre=R,post=R);tr|B4DY08|B4DY08_HUMAN(pre=R,post=R);tr|G3V576|G3V576_HUMAN(pre=R,post=R);tr|B2R5W2|B2R5W2_HUMAN(pre=R,post=R);tr|G3V575|G3V575_HUMAN(pre=R,post=R);tr|G3V2Q1|G3V2Q1_HUMAN(pre=R,post=R);tr|G3V4C1|G3V4C1_HUMAN(pre=R,post=R);tr|G3V4W0|G3V4W0_HUMAN(pre=R,post=R);tr|G3V2D6|G3V2D6_HUMAN(pre=R…	3	509.309	1	1	1	3	5	2	0	2	0	0.986023	1	Valid
730	20160312_12_A11.20733.20733.2 File:"20160312_12_A11.raw", NativeID:"controllerType=0 controllerNumber=1 scan=20733"	SGYSTAR+0.984SAYSSYSAPVSSSLSVR	SGYSTArSAYSSYSAPVSSSLSVR	sp|P07196|NFL_HUMAN(pre=R,post=R);tr|A0A0S2Z436|A0A0S2Z436_HUMAN(pre=R,post=R);tr|A0A087X0W2|A0A087X0W2_HUMAN(pre=R,post=R)	2	1236.09	1	0	2	1	3	1	0	1	0	0.839242	1	Valid
731	20160312_12_A11.21620.21620.3 File:"20160312_12_A11.raw", NativeID:"controllerType=0 controllerNumber=1 scan=21620"	NGQTR+0.984EHALLAYTLGVK	NGQTrEHALLAYTLGVK	sp|Q5VTE0|EF1A3_HUMAN(pre=K,post=Q);sp|P68104|EF1A1_HUMAN(pre=K,post=Q);sp|Q05639|EF1A2_HUMAN(pre=K,post=Q);tr|A0A087WV01|A0A087WV01_HUMAN(pre=K,post=Q);tr|A0A2R8Y488|A0A2R8Y488_HUMAN(pre=K,post=Q);tr|A0A2U3TZH3|A0A2U3TZH3_HUMAN(pre=K,post=Q);tr|A0A2R8Y660|A0A2R8Y660_HUMAN(pre=K,post=Q)	3	624.671	1	0	2	0	2	0	0	0	0	0.5062	1	Valid
732	20160312_12_A11.22031.22031.2 File:"20160312_12_A11.raw", NativeID:"controllerType=0 controllerNumber=1 scan=22031"	FSWGAEGQRPGFGYGGR+0.984ASDYK	FSWGAEGQRPGFGYGGrASDYK	sp|P02686|MBP_HUMAN(pre=R,post=S);sp|P02686-3|MBP_HUMAN(pre=R,post=S);sp|P02686-5|MBP_HUMAN(pre=R,post=S);tr|C9J6H1|C9J6H1_HUMAN(pre=R,post=S);tr|J3QL64|J3QL64_HUMAN(pre=R,post=S);tr|E9PJ72|E9PJ72_HUMAN(pre=R,post=S);tr|A8MZH3|A8MZH3_HUMAN(pre=R,post=S)	2	1197.55	1	0	0	1	1	0	0	0	0	0.278664	0	Valid
733	20160312_12_A11.22046.22046.3 File:"20160312_12_A11.raw", NativeID:"controllerType=0 controllerNumber=1 scan=22046"	AFSMDEHNAALR+0.984TAGFPN+0.984GSLGK	AFSMDEHNAALrTAGFPnGSLGK	sp|Q9NZH0|GPC5B_HUMAN(pre=K,post=R);sp|Q9NZH0-2|GPC5B_HUMAN(pre=K,post=R)	3	798.378	1	0	0	0	0	0	0	0	0	0.127083	0	Ambiguous
734	20160312_12_A11.22238.22238.2 File:"20160312_12_A11.raw", NativeID:"controllerType=0 controllerNumber=1 scan=22238"	GIAGR+0.984QDILDDSGYVSAYK	GIAGrQDILDDSGYVSAYK	sp|Q9BW30|TPPP3_HUMAN(pre=K,post=N)	2	1015	1	0	0	2	2	4	2	6	0	0.980852	1	Valid
735	20160312_12_A11.22456.22456.3 File:"20160312_12_A11.raw", NativeID:"controllerType=0 controllerNumber=1 scan=22456"	R+0.984HSSEGGVKSSQVLGLQQHAR	rHSSEGGVKSSQVLGLQQHAR	sp|Q5TEJ8|THMS2_HUMAN(pre=R,post=L);sp|Q5TEJ8-3|THMS2_HUMAN(pre=R,post=L);sp|Q5TEJ8-5|THMS2_HUMAN(pre=R,post=L);sp|Q5TEJ8-6|THMS2_HUMAN(pre=R,post=L);tr|H7C124|H7C124_HUMAN(pre=R,post=L)	3	754.729	1	0	5	0	5	0	0	0	0	0.950382	1	Valid
736	20160312_12_A11.23091.23091.3 File:"20160312_12_A11.raw", NativeID:"controllerType=0 controllerNumber=1 scan=23091"	AGFAGDDAPR+0.984AVFPSIVGRPR	AGFAGDDAPrAVFPSIVGRPR	sp|Q6S8J3|POTEE_HUMAN(pre=K,post=Q);sp|A5A3E0|POTEF_HUMAN(pre=K,post=Q);sp|P0CG38|POTEI_HUMAN(pre=K,post=Q);tr|I3L4N8|I3L4N8_HUMAN(pre=K,post=H);sp|P63267|ACTH_HUMAN(pre=K,post=H);sp|P63267-2|ACTH_HUMAN(pre=K,post=H);sp|P63261|ACTG_HUMAN(pre=K,post=H);sp|P62736|ACTA_HUMAN(pre=K,post=H);sp|P68133|ACTS_HUMAN(pre=K,post=H);sp|P60709|ACTB_HUMAN(pre=K,post=H);sp|P68032|ACTC_HUMAN(pre=K,post=H);tr|I3L3…	3	719.712	1	0	6	1	7	0	0	0	0	0.99264	1	Valid
737	20160312_12_A11.23157.23157.2 File:"20160312_12_A11.raw", NativeID:"controllerType=0 controllerNumber=1 scan=23157"	TGTYR+0.984QLFHPEQLITGK	TGTYrQLFHPEQLITGK	sp|Q6PEY2|TBA3E_HUMAN(pre=R,post=E);sp|P0DPH7|TBA3C_HUMAN(pre=R,post=E);sp|P0DPH7-2|TBA3C_HUMAN(pre=R,post=E);sp|P68363|TBA1B_HUMAN(pre=R,post=E);sp|P68363-2|TBA1B_HUMAN(pre=R,post=E);sp|Q9BQE3|TBA1C_HUMAN(pre=R,post=E);sp|P0DPH8|TBA3D_HUMAN(pre=R,post=E);sp|Q71U36|TBA1A_HUMAN(pre=R,post=E);sp|Q71U36-2|TBA1A_HUMAN(pre=R,post=E);tr|F8VVB9|F8VVB9_HUMAN(pre=R,post=E);tr|F5H5D3|F5H5D3_HUMAN(pre=R,pos…	2	995.524	1	1	9	1	11	2	1	3	0	0.999979	1	Valid
738	20160312_12_A11.23618.23618.3 File:"20160312_12_A11.raw", NativeID:"controllerType=0 controllerNumber=1 scan=23618"	DMASFHER+0.984PIIFALSNPTSK	DMASFHErPIIFALSNPTSK	sp|Q16798|MAON_HUMAN(pre=R,post=A);tr|E9PMB9|E9PMB9_HUMAN(pre=R,post=A)	3	754.713	1	0	0	1	1	1	0	1	0	0.425753	0	Valid
739	20160312_12_A11.23676.23676.3 File:"20160312_12_A11.raw", NativeID:"controllerType=0 controllerNumber=1 scan=23676"	TVVLGDLLIDDKDTVR+0.984	TVVLGDLLIDDKDTVr	sp|Q8TCD5|NT5C_HUMAN(pre=K,post=G);tr|J3KRC4|J3KRC4_HUMAN(pre=K,post=G);tr|J3KSY6|J3KSY6_HUMAN(pre=K,post=G)	3	591.66	1	0	0	0	0	0	0	0	0	0.127083	0	Ambiguous
740	20160312_12_A11.25265.25265.3 File:"20160312_12_A11.raw", NativeID:"controllerType=0 controllerNumber=1 scan=25265"	GR+0.984GLSLSR+0.984FSWGAEGQRPGFGYGGR	GrGLSLSrFSWGAEGQRPGFGYGGR	sp|P02686|MBP_HUMAN(pre=K,post=A);sp|P02686-3|MBP_HUMAN(pre=K,post=A);sp|P02686-5|MBP_HUMAN(pre=K,post=A);tr|C9J6H1|C9J6H1_HUMAN(pre=K,post=A);tr|J3QL64|J3QL64_HUMAN(pre=K,post=A);tr|E9PJ72|E9PJ72_HUMAN(pre=K,post=A);tr|A8MZH3|A8MZH3_HUMAN(pre=K,post=A)	3	886.438	2	0	3	2	5	0	0	0	0	0.950382	1	Valid
741	20160312_12_A11.25271.25271.4 File:"20160312_12_A11.raw", NativeID:"controllerType=0 controllerNumber=1 scan=25271"	APDELHYTYLDTFGR+0.984PVIVAYK	APDELHYTYLDTFGrPVIVAYK	sp|P04843|RPN1_HUMAN(pre=R,post=K);tr|B7Z4L4|B7Z4L4_HUMAN(pre=R,post=K)	4	643.08	1	0	2	1	3	0	0	0	0	0.731196	1	Valid
742	20160312_12_A11.25706.25706.3 File:"20160312_12_A11.raw", NativeID:"controllerType=0 controllerNumber=1 scan=25706"	GLSLSRFSWGAEGQR+0.984PGFGYGGRASDYK	GLSLSRFSWGAEGQrPGFGYGGRASDYK	sp|P02686|MBP_HUMAN(pre=R,post=S);sp|P02686-3|MBP_HUMAN(pre=R,post=S);sp|P02686-5|MBP_HUMAN(pre=R,post=S);tr|C9J6H1|C9J6H1_HUMAN(pre=R,post=S);tr|J3QL64|J3QL64_HUMAN(pre=R,post=S);tr|E9PJ72|E9PJ72_HUMAN(pre=R,post=S);tr|A8MZH3|A8MZH3_HUMAN(pre=R,post=S)	3	1003.15	1	0	5	0	5	0	0	0	0	0.950382	1	Valid
743	20160312_12_A11.26020.26020.3 File:"20160312_12_A11.raw", NativeID:"controllerType=0 controllerNumber=1 scan=26020"	IEQ+0.984ER+0.984R+0.984KEAER+0.984IAR+0.984ER+0.984EELR+0.984RQQQQLR	IEqErrKEAErIArErEELrRQQQQLR	sp|Q9NWH9|SLTM_HUMAN(pre=R,post=Y);sp|Q9NWH9-3|SLTM_HUMAN(pre=R,post=Y);tr|H7C3F4|H7C3F4_HUMAN(pre=R,post=Y)	3	1180.94	6	0	1	5	6	0	0	0	0	0.980705	1	Valid
744	20160312_12_A11.27152.27152.3 File:"20160312_12_A11.raw", NativeID:"controllerType=0 controllerNumber=1 scan=27152"	QTVNR+0.984GPGLGSTQGQTIALPAQGLIEFR	QTVNrGPGLGSTQGQTIALPAQGLIEFR	sp|Q00577|PURA_HUMAN(pre=R,post=D)	3	970.853	1	0	0	1	1	0	0	0	0	0.278664	0	Valid
745	20160312_12_A11.2785.2785.2 File:"20160312_12_A11.raw", NativeID:"controllerType=0 controllerNumber=1 scan=2785"	YIQAER+0.984EK	YIQAErEK	sp|Q96QC0|PP1RA_HUMAN(pre=R,post=G)	2	519.267	1	0	1	1	2	0	1	1	0	0.663002	1	Valid
746	20160312_12_A11.28417.28417.3 File:"20160312_12_A11.raw", NativeID:"controllerType=0 controllerNumber=1 scan=28417"	M+15.995EEIANFPVR+0.984PSDVWIVTYPK	mEEIANFPVrPSDVWIVTYPK	sp|Q9BR01|ST4A1_HUMAN(pre=K,post=S);sp|Q9BR01-2|ST4A1_HUMAN(pre=K,post=S);tr|F8WE22|F8WE22_HUMAN(pre=K,post=S)	3	836.755	1	0	0	0	0	0	0	0	0	0.127083	0	Ambiguous
747	20160312_12_A11.28555.28555.3 File:"20160312_12_A11.raw", NativeID:"controllerType=0 controllerNumber=1 scan=28555"	ITIPVQTFSNLQIR+0.984ETSLDTK	ITIPVQTFSNLQIrETSLDTK	sp|P14136|GFAP_HUMAN(pre=R,post=S);tr|K7EMP8|K7EMP8_HUMAN(pre=R,post=S);tr|A0A1W2PPA3|A0A1W2PPA3_HUMAN(pre=R,post=S);tr|A0A1W2PRT3|A0A1W2PRT3_HUMAN(pre=R,post=S);tr|K7EPI4|K7EPI4_HUMAN(pre=R,post=S);tr|A0A1W2PR46|A0A1W2PR46_HUMAN(pre=R,post=S)	3	802.436	1	0	0	1	1	1	1	2	0	0.587272	1	Valid
748	20160312_12_A11.29111.29111.3 File:"20160312_12_A11.raw", NativeID:"controllerType=0 controllerNumber=1 scan=29111"	ILTAER+0.984DYLDLTASNNFFVDDYAR	ILTAErDYLDLTASNNFFVDDYAR	sp|Q9NYU2|UGGG1_HUMAN(pre=R,post=F);sp|Q9NYU2-2|UGGG1_HUMAN(pre=R,post=F)	3	941.788	1	0	0	0	0	0	0	0	0	0.127083	0	Ambiguous
749	20160312_12_A11.31472.31472.4 File:"20160312_12_A11.raw", NativeID:"controllerType=0 controllerNumber=1 scan=31472"	SQNSMN+0.984R+0.984LAVQALEKMETRKFNSKSKGR	SQNSMnrLAVQALEKMETRKFNSKSKGR	sp|Q9ULT6|ZNRF3_HUMAN(pre=R,post=R);sp|Q9ULT6-2|ZNRF3_HUMAN(pre=R,post=R)	4	810.92	1	0	0	0	0	1	0	1	0	0.218385	0	Valid
750	20160312_12_A11.32019.32019.4 File:"20160312_12_A11.raw", NativeID:"controllerType=0 controllerNumber=1 scan=32019"	PVSPLLLASGMARDWPDAR+0.984GIWHNDNK	PVSPLLLASGMARDWPDArGIWHNDNK	sp|P06732|KCRM_HUMAN(pre=K,post=S);sp|P12277|KCRB_HUMAN(pre=K,post=T);tr|H0YJG0|H0YJG0_HUMAN(pre=K,post=T)	4	755.132	1	0	2	1	3	0	0	0	0	0.731196	1	Valid
751	20160312_12_A11.32509.32509.3 File:"20160312_12_A11.raw", NativeID:"controllerType=0 controllerNumber=1 scan=32509"	VTMILQSPSFR+0.984EELEGLIQEQMK	VTMILQSPSFrEELEGLIQEQMK	sp|P35612|ADDB_HUMAN(pre=R,post=K);sp|P35612-2|ADDB_HUMAN(pre=R,post=K);sp|P35612-3|ADDB_HUMAN(pre=R,post=K);sp|P35612-4|ADDB_HUMAN(pre=R,post=K);sp|P35612-5|ADDB_HUMAN(pre=R,post=K);sp|P35612-6|ADDB_HUMAN(pre=R,post=K);sp|P35612-7|ADDB_HUMAN(pre=R,post=K);sp|P35612-8|ADDB_HUMAN(pre=R,post=K);sp|P35612-9|ADDB_HUMAN(pre=R,post=K);tr|C9JTM0|C9JTM0_HUMAN(pre=R,post=K);tr|C9J080|C9J080_HUMAN(pre=R,po…	3	903.128	1	0	0	3	3	0	1	1	0	0.839242	1	Valid
752	20160312_12_A11.33343.33343.2 File:"20160312_12_A11.raw", NativeID:"controllerType=0 controllerNumber=1 scan=33343"	DTGILDSIGR+0.984FFGGDR	DTGILDSIGrFFGGDR	tr|H7BYR8|H7BYR8_HUMAN(pre=R,post=G);sp|P02686|MBP_HUMAN(pre=R,post=G);sp|P02686-2|MBP_HUMAN(pre=R,post=G);sp|P02686-3|MBP_HUMAN(pre=R,post=G);sp|P02686-4|MBP_HUMAN(pre=R,post=G);sp|P02686-5|MBP_HUMAN(pre=R,post=G);sp|P02686-6|MBP_HUMAN(pre=R,post=G);tr|E9PKX9|E9PKX9_HUMAN(pre=R,post=G);tr|J3QL64|J3QL64_HUMAN(pre=R,post=G);tr|E9PJ72|E9PJ72_HUMAN(pre=R,post=G);tr|J3KT34|J3KT34_HUMAN(pre=R,post=G);…	2	863.924	1	0	6	0	6	0	0	0	0	0.980705	1	Valid
753	20160312_12_A11.33354.33354.4 File:"20160312_12_A11.raw", NativeID:"controllerType=0 controllerNumber=1 scan=33354"	SSLRC+57.021C+57.021RIR+0.984FTWALALLQ+0.984VIN+0.984SLAVYRHR	SSLRccRIrFTWALALLqVInSLAVYRHR	tr|A0A1B0GW90|A0A1B0GW90_HUMAN(pre=R,post=E)	4	891.478	1	0	1	1	2	0	0	0	0	0.5062	1	Valid
754	20160312_12_A11.33381.33381.3 File:"20160312_12_A11.raw", NativeID:"controllerType=0 controllerNumber=1 scan=33381"	DTGILDSIGR+0.984FFGGDR	DTGILDSIGrFFGGDR	tr|H7BYR8|H7BYR8_HUMAN(pre=R,post=G);sp|P02686|MBP_HUMAN(pre=R,post=G);sp|P02686-2|MBP_HUMAN(pre=R,post=G);sp|P02686-3|MBP_HUMAN(pre=R,post=G);sp|P02686-4|MBP_HUMAN(pre=R,post=G);sp|P02686-5|MBP_HUMAN(pre=R,post=G);sp|P02686-6|MBP_HUMAN(pre=R,post=G);tr|E9PKX9|E9PKX9_HUMAN(pre=R,post=G);tr|J3QL64|J3QL64_HUMAN(pre=R,post=G);tr|E9PJ72|E9PJ72_HUMAN(pre=R,post=G);tr|J3KT34|J3KT34_HUMAN(pre=R,post=G);…	3	576.285	1	0	1	1	2	1	0	1	0	0.663002	1	Valid
755	20160312_12_A11.33537.33537.3 File:"20160312_12_A11.raw", NativeID:"controllerType=0 controllerNumber=1 scan=33537"	DTGILDSIGR+0.984FFGGDR	DTGILDSIGrFFGGDR	tr|H7BYR8|H7BYR8_HUMAN(pre=R,post=G);sp|P02686|MBP_HUMAN(pre=R,post=G);sp|P02686-2|MBP_HUMAN(pre=R,post=G);sp|P02686-3|MBP_HUMAN(pre=R,post=G);sp|P02686-4|MBP_HUMAN(pre=R,post=G);sp|P02686-5|MBP_HUMAN(pre=R,post=G);sp|P02686-6|MBP_HUMAN(pre=R,post=G);tr|E9PKX9|E9PKX9_HUMAN(pre=R,post=G);tr|J3QL64|J3QL64_HUMAN(pre=R,post=G);tr|E9PJ72|E9PJ72_HUMAN(pre=R,post=G);tr|J3KT34|J3KT34_HUMAN(pre=R,post=G);…	3	576.285	1	0	1	1	2	1	0	1	0	0.663002	1	Valid
756	20160312_12_A11.33540.33540.2 File:"20160312_12_A11.raw", NativeID:"controllerType=0 controllerNumber=1 scan=33540"	DTGILDSIGR+0.984FFGGDR	DTGILDSIGrFFGGDR	tr|H7BYR8|H7BYR8_HUMAN(pre=R,post=G);sp|P02686|MBP_HUMAN(pre=R,post=G);sp|P02686-2|MBP_HUMAN(pre=R,post=G);sp|P02686-3|MBP_HUMAN(pre=R,post=G);sp|P02686-4|MBP_HUMAN(pre=R,post=G);sp|P02686-5|MBP_HUMAN(pre=R,post=G);sp|P02686-6|MBP_HUMAN(pre=R,post=G);tr|E9PKX9|E9PKX9_HUMAN(pre=R,post=G);tr|J3QL64|J3QL64_HUMAN(pre=R,post=G);tr|E9PJ72|E9PJ72_HUMAN(pre=R,post=G);tr|J3KT34|J3KT34_HUMAN(pre=R,post=G);…	2	863.924	1	0	6	1	7	1	0	1	0	0.996151	1	Valid
757	20160312_12_A11.33676.33676.3 File:"20160312_12_A11.raw", NativeID:"controllerType=0 controllerNumber=1 scan=33676"	ISLPLPNFSSLNLR+0.984ETNLDSLPLVDTHSK	ISLPLPNFSSLNLrETNLDSLPLVDTHSK	sp|P08670|VIME_HUMAN(pre=R,post=R)	3	1074.57	1	0	4	2	6	1	1	2	0	0.994687	1	Valid
758	20160312_12_A11.33696.33696.4 File:"20160312_12_A11.raw", NativeID:"controllerType=0 controllerNumber=1 scan=33696"	ISLPLPNFSSLNLR+0.984ETNLDSLPLVDTHSK	ISLPLPNFSSLNLrETNLDSLPLVDTHSK	sp|P08670|VIME_HUMAN(pre=R,post=R)	4	806.182	1	0	0	0	0	0	0	0	0	0.127083	0	Ambiguous
759	20160312_12_A11.3441.3441.2 File:"20160312_12_A11.raw", NativeID:"controllerType=0 controllerNumber=1 scan=3441"	DSR+0.984SGSPMAR	DSrSGSPMAR	tr|H7BYR8|H7BYR8_HUMAN(pre=R,post=R);sp|P02686|MBP_HUMAN(pre=R,post=R);sp|P02686-3|MBP_HUMAN(pre=R,post=R);sp|P02686-4|MBP_HUMAN(pre=R,post=R);sp|P02686-5|MBP_HUMAN(pre=R,post=R);sp|P02686-6|MBP_HUMAN(pre=R,post=R);tr|E9PJ72|E9PJ72_HUMAN(pre=R,post=R);tr|A8MZH3|A8MZH3_HUMAN(pre=R,post=R);tr|J3QQK6|J3QQK6_HUMAN(pre=R,post=R);tr|F8WEU6|F8WEU6_HUMAN(pre=R,post=R)	2	532.744	1	0	0	0	0	0	0	0	0	0.127083	0	Ambiguous
760	20160312_12_A11.35578.35578.3 File:"20160312_12_A11.raw", NativeID:"controllerType=0 controllerNumber=1 scan=35578"	DDAVALVDVIAPPDFVLDSPIGR+0.984	DDAVALVDVIAPPDFVLDSPIGr	sp|O15254|ACOX3_HUMAN(pre=K,post=A)	3	799.085	1	0	0	0	0	0	0	0	0	0.127083	0	Ambiguous
761	20160312_12_A11.36751.36751.3 File:"20160312_12_A11.raw", NativeID:"controllerType=0 controllerNumber=1 scan=36751"	GKKSHKRTSKSRERHNSPSR+0.984GR+0.984N+0.984RHR	GKKSHKRTSKSRERHNSPSrGrnRHR	sp|Q15695|U2AFL_HUMAN(pre=R,post=S)	3	1048.23	2	0	0	0	0	0	0	0	0	0.127083	0	Valid
762	20160312_12_A11.36905.36905.3 File:"20160312_12_A11.raw", NativeID:"controllerType=0 controllerNumber=1 scan=36905"	GFGYAEFEDLDSLLSALSLNEESLGNR+0.984R	GFGYAEFEDLDSLLSALSLNEESLGNrR	tr|F8VYE9|F8VYE9_HUMAN(pre=K,post=I);sp|P23588|IF4B_HUMAN(pre=K,post=I);tr|F8VSC7|F8VSC7_HUMAN(pre=K,post=I);tr|F8W0K0|F8W0K0_HUMAN(pre=K,post=I);tr|E7EX17|E7EX17_HUMAN(pre=K,post=I);tr|F8VP89|F8VP89_HUMAN(pre=K,post=I);tr|F8VX11|F8VX11_HUMAN(pre=K,post=I)	3	1035.17	1	0	0	0	0	0	0	0	0	0.127083	0	Ambiguous
763	20160312_12_A11.4503.4503.2 File:"20160312_12_A11.raw", NativeID:"controllerType=0 controllerNumber=1 scan=4503"	LGGR+0.984DSR+0.984SGSPM+15.995AR	LGGrDSrSGSPmAR	tr|H7BYR8|H7BYR8_HUMAN(pre=K,post=R);sp|P02686|MBP_HUMAN(pre=K,post=R);sp|P02686-3|MBP_HUMAN(pre=K,post=R);sp|P02686-4|MBP_HUMAN(pre=K,post=R);sp|P02686-5|MBP_HUMAN(pre=K,post=R);sp|P02686-6|MBP_HUMAN(pre=K,post=R);tr|E9PJ72|E9PJ72_HUMAN(pre=K,post=R);tr|A8MZH3|A8MZH3_HUMAN(pre=K,post=R)	2	732.847	2	2	8	2	12	3	1	4	0	0.999996	1	Valid
764	20160312_12_A11.5068.5068.2 File:"20160312_12_A11.raw", NativeID:"controllerType=0 controllerNumber=1 scan=5068"	LGGR+0.984DSR+0.984SGSPM+15.995AR+0.984R	LGGrDSrSGSPmArR	tr|H7BYR8|H7BYR8_HUMAN(pre=K,post=-);sp|P02686|MBP_HUMAN(pre=K,post=-);sp|P02686-3|MBP_HUMAN(pre=K,post=-);sp|P02686-4|MBP_HUMAN(pre=K,post=-);sp|P02686-5|MBP_HUMAN(pre=K,post=-);sp|P02686-6|MBP_HUMAN(pre=K,post=-);tr|E9PJ72|E9PJ72_HUMAN(pre=K,post=-);tr|A8MZH3|A8MZH3_HUMAN(pre=K,post=-)	2	811.39	3	2	6	0	8	1	0	1	0	0.998546	1	Valid
765	20160312_12_A11.6661.6661.2 File:"20160312_12_A11.raw", NativeID:"controllerType=0 controllerNumber=1 scan=6661"	PR+0.984PPN+0.984SHSTPR+0.984PAPC+57.021SPR	PrPPnSHSTPrPAPcSPR	tr|M0R161|M0R161_HUMAN(pre=R,post=Q);tr|M0QYW1|M0QYW1_HUMAN(pre=R,post=Q)	2	1007.48	2	0	4	0	4	0	1	1	0	0.932673	1	Valid
766	20160312_12_A11.7074.7074.2 File:"20160312_12_A11.raw", NativeID:"controllerType=0 controllerNumber=1 scan=7074"	LGGR+0.984DSR+0.984SGSPMAR	LGGrDSrSGSPMAR	tr|H7BYR8|H7BYR8_HUMAN(pre=K,post=R);sp|P02686|MBP_HUMAN(pre=K,post=R);sp|P02686-3|MBP_HUMAN(pre=K,post=R);sp|P02686-4|MBP_HUMAN(pre=K,post=R);sp|P02686-5|MBP_HUMAN(pre=K,post=R);sp|P02686-6|MBP_HUMAN(pre=K,post=R);tr|E9PJ72|E9PJ72_HUMAN(pre=K,post=R);tr|A8MZH3|A8MZH3_HUMAN(pre=K,post=R)	2	724.85	2	2	10	4	16	5	2	7	0	1	1	Valid
767	20160312_12_A11.7277.7277.2 File:"20160312_12_A11.raw", NativeID:"controllerType=0 controllerNumber=1 scan=7277"	LGGR+0.984DSR+0.984SGSPMAR	LGGrDSrSGSPMAR	tr|H7BYR8|H7BYR8_HUMAN(pre=K,post=R);sp|P02686|MBP_HUMAN(pre=K,post=R);sp|P02686-3|MBP_HUMAN(pre=K,post=R);sp|P02686-4|MBP_HUMAN(pre=K,post=R);sp|P02686-5|MBP_HUMAN(pre=K,post=R);sp|P02686-6|MBP_HUMAN(pre=K,post=R);tr|E9PJ72|E9PJ72_HUMAN(pre=K,post=R);tr|A8MZH3|A8MZH3_HUMAN(pre=K,post=R)	2	724.85	2	2	6	1	9	1	0	1	0	0.999452	1	Valid
768	20160312_12_A11.7688.7688.2 File:"20160312_12_A11.raw", NativeID:"controllerType=0 controllerNumber=1 scan=7688"	LGGR+0.984DSR+0.984SGSPMAR+0.984R	LGGrDSrSGSPMArR	tr|H7BYR8|H7BYR8_HUMAN(pre=K,post=-);sp|P02686|MBP_HUMAN(pre=K,post=-);sp|P02686-3|MBP_HUMAN(pre=K,post=-);sp|P02686-4|MBP_HUMAN(pre=K,post=-);sp|P02686-5|MBP_HUMAN(pre=K,post=-);sp|P02686-6|MBP_HUMAN(pre=K,post=-);tr|E9PJ72|E9PJ72_HUMAN(pre=K,post=-);tr|A8MZH3|A8MZH3_HUMAN(pre=K,post=-)	2	803.392	3	3	17	1	21	3	2	5	0	1	1	Valid
769	20160312_12_A11.7697.7697.3 File:"20160312_12_A11.raw", NativeID:"controllerType=0 controllerNumber=1 scan=7697"	LGGR+0.984DSR+0.984SGSPMAR+0.984R	LGGrDSrSGSPMArR	tr|H7BYR8|H7BYR8_HUMAN(pre=K,post=-);sp|P02686|MBP_HUMAN(pre=K,post=-);sp|P02686-3|MBP_HUMAN(pre=K,post=-);sp|P02686-4|MBP_HUMAN(pre=K,post=-);sp|P02686-5|MBP_HUMAN(pre=K,post=-);sp|P02686-6|MBP_HUMAN(pre=K,post=-);tr|E9PJ72|E9PJ72_HUMAN(pre=K,post=-);tr|A8MZH3|A8MZH3_HUMAN(pre=K,post=-)	3	535.931	3	0	5	2	7	1	0	1	0	0.996151	1	Valid
770	20160312_12_A11.7969.7969.2 File:"20160312_12_A11.raw", NativeID:"controllerType=0 controllerNumber=1 scan=7969"	GR+0.984GLSLSR	GrGLSLSR	tr|H7BYR8|H7BYR8_HUMAN(pre=K,post=F);sp|P02686|MBP_HUMAN(pre=K,post=F);sp|P02686-3|MBP_HUMAN(pre=K,post=F);sp|P02686-5|MBP_HUMAN(pre=K,post=F);tr|C9J6H1|C9J6H1_HUMAN(pre=K,post=F);tr|J3QL64|J3QL64_HUMAN(pre=K,post=F);tr|E9PJ72|E9PJ72_HUMAN(pre=K,post=F);tr|J3QKL5|J3QKL5_HUMAN(pre=K,post=F);tr|J3KT01|J3KT01_HUMAN(pre=K,post=F);tr|A8MZH3|A8MZH3_HUMAN(pre=K,post=F)	2	423.744	1	0	1	0	1	0	0	0	0	0.278664	0	Valid
771	20160312_12_A11.8932.8932.2 File:"20160312_12_A11.raw", NativeID:"controllerType=0 controllerNumber=1 scan=8932"	GGTLQR+0.984STSFR	GGTLQrSTSFR	sp|Q92614|MY18A_HUMAN(pre=K,post=Q);sp|Q92614-2|MY18A_HUMAN(pre=K,post=Q);sp|Q92614-3|MY18A_HUMAN(pre=K,post=Q);sp|Q92614-4|MY18A_HUMAN(pre=K,post=Q);sp|Q92614-5|MY18A_HUMAN(pre=K,post=Q);tr|A0A0D9SFK2|A0A0D9SFK2_HUMAN(pre=K,post=Q)	2	605.813	1	1	2	1	4	0	0	0	0	0.878318	1	Valid
772	20160312_12_A11.9109.9109.2 File:"20160312_12_A11.raw", NativeID:"controllerType=0 controllerNumber=1 scan=9109"	EASPSR+0.984LSVAR	EASPSrLSVAR	tr|H7C4M5|H7C4M5_HUMAN(pre=R,post=S);tr|E3W994|E3W994_HUMAN(pre=R,post=S);tr|J3KR49|J3KR49_HUMAN(pre=R,post=S);tr|E7ERI8|E7ERI8_HUMAN(pre=R,post=S);tr|E7EW49|E7EW49_HUMAN(pre=R,post=S);tr|A0A0U1RQI6|A0A0U1RQI6_HUMAN(pre=R,post=S);sp|O75122|CLAP2_HUMAN(pre=R,post=S);sp|O75122-3|CLAP2_HUMAN(pre=R,post=S)	2	587.315	1	0	7	4	11	1	2	3	0	0.999979	1	Valid
773	20160312_15_B1.1003.1003.2 File:"20160312_15_B1.raw", NativeID:"controllerType=0 controllerNumber=1 scan=1003"	DSR+0.984SGSPM+15.995AR	DSrSGSPmAR	tr|H7BYR8|H7BYR8_HUMAN(pre=R,post=R);sp|P02686|MBP_HUMAN(pre=R,post=R);sp|P02686-3|MBP_HUMAN(pre=R,post=R);sp|P02686-4|MBP_HUMAN(pre=R,post=R);sp|P02686-5|MBP_HUMAN(pre=R,post=R);sp|P02686-6|MBP_HUMAN(pre=R,post=R);tr|E9PJ72|E9PJ72_HUMAN(pre=R,post=R);tr|A8MZH3|A8MZH3_HUMAN(pre=R,post=R);tr|J3QQK6|J3QQK6_HUMAN(pre=R,post=R);tr|F8WEU6|F8WEU6_HUMAN(pre=R,post=R)	2	540.741	1	0	1	1	2	1	0	1	1	0.969442	1	Valid
774	20160312_15_B1.10093.10093.2 File:"20160312_15_B1.raw", NativeID:"controllerType=0 controllerNumber=1 scan=10093"	EISPGSGPGEIR+0.984K	EISPGSGPGEIrK	sp|O43491|E41L2_HUMAN(pre=K,post=V);sp|O43491-4|E41L2_HUMAN(pre=K,post=V);tr|Q6R5J7|Q6R5J7_HUMAN(pre=K,post=V);tr|E9PHY5|E9PHY5_HUMAN(pre=K,post=V);tr|E9PMV8|E9PMV8_HUMAN(pre=K,post=V);tr|E9PK52|E9PK52_HUMAN(pre=K,post=V);tr|H0Y5B0|H0Y5B0_HUMAN(pre=K,post=V);tr|E9PMG5|E9PMG5_HUMAN(pre=K,post=V)	2	664.347	1	0	2	0	2	0	0	0	0	0.5062	1	Valid
775	20160312_15_B1.10323.10323.2 File:"20160312_15_B1.raw", NativeID:"controllerType=0 controllerNumber=1 scan=10323"	NIVTPR+0.984TPPPSQGK	NIVTPrTPPPSQGK	tr|H7BYR8|H7BYR8_HUMAN(pre=K,post=G);sp|P02686|MBP_HUMAN(pre=K,post=G);sp|P02686-3|MBP_HUMAN(pre=K,post=G);sp|P02686-4|MBP_HUMAN(pre=K,post=G);sp|P02686-5|MBP_HUMAN(pre=K,post=G);sp|P02686-6|MBP_HUMAN(pre=K,post=G);tr|C9J6H1|C9J6H1_HUMAN(pre=K,post=G);tr|J3QL64|J3QL64_HUMAN(pre=K,post=G);tr|E9PJ72|E9PJ72_HUMAN(pre=K,post=G);tr|J3QKL5|J3QKL5_HUMAN(pre=K,post=G);tr|J3KT01|J3KT01_HUMAN(pre=K,post=G)…	2	746.91	1	0	4	2	6	2	3	5	0	0.999245	1	Valid
776	20160312_15_B1.10492.10492.2 File:"20160312_15_B1.raw", NativeID:"controllerType=0 controllerNumber=1 scan=10492"	NIVTPR+0.984TPPPSQGK	NIVTPrTPPPSQGK	tr|H7BYR8|H7BYR8_HUMAN(pre=K,post=G);sp|P02686|MBP_HUMAN(pre=K,post=G);sp|P02686-3|MBP_HUMAN(pre=K,post=G);sp|P02686-4|MBP_HUMAN(pre=K,post=G);sp|P02686-5|MBP_HUMAN(pre=K,post=G);sp|P02686-6|MBP_HUMAN(pre=K,post=G);tr|C9J6H1|C9J6H1_HUMAN(pre=K,post=G);tr|J3QL64|J3QL64_HUMAN(pre=K,post=G);tr|E9PJ72|E9PJ72_HUMAN(pre=K,post=G);tr|J3QKL5|J3QKL5_HUMAN(pre=K,post=G);tr|J3KT01|J3KT01_HUMAN(pre=K,post=G)…	2	746.91	1	0	9	5	14	2	4	6	0	1	1	Valid
777	20160312_15_B1.10566.10566.3 File:"20160312_15_B1.raw", NativeID:"controllerType=0 controllerNumber=1 scan=10566"	NIVTPR+0.984TPPPSQGK	NIVTPrTPPPSQGK	tr|H7BYR8|H7BYR8_HUMAN(pre=K,post=G);sp|P02686|MBP_HUMAN(pre=K,post=G);sp|P02686-3|MBP_HUMAN(pre=K,post=G);sp|P02686-4|MBP_HUMAN(pre=K,post=G);sp|P02686-5|MBP_HUMAN(pre=K,post=G);sp|P02686-6|MBP_HUMAN(pre=K,post=G);tr|C9J6H1|C9J6H1_HUMAN(pre=K,post=G);tr|J3QL64|J3QL64_HUMAN(pre=K,post=G);tr|E9PJ72|E9PJ72_HUMAN(pre=K,post=G);tr|J3QKL5|J3QKL5_HUMAN(pre=K,post=G);tr|J3KT01|J3KT01_HUMAN(pre=K,post=G)…	3	498.276	1	0	0	3	3	2	3	5	0	0.986077	1	Valid
778	20160312_15_B1.10658.10658.2 File:"20160312_15_B1.raw", NativeID:"controllerType=0 controllerNumber=1 scan=10658"	NIVTPR+0.984TPPPSQGK	NIVTPrTPPPSQGK	tr|H7BYR8|H7BYR8_HUMAN(pre=K,post=G);sp|P02686|MBP_HUMAN(pre=K,post=G);sp|P02686-3|MBP_HUMAN(pre=K,post=G);sp|P02686-4|MBP_HUMAN(pre=K,post=G);sp|P02686-5|MBP_HUMAN(pre=K,post=G);sp|P02686-6|MBP_HUMAN(pre=K,post=G);tr|C9J6H1|C9J6H1_HUMAN(pre=K,post=G);tr|J3QL64|J3QL64_HUMAN(pre=K,post=G);tr|E9PJ72|E9PJ72_HUMAN(pre=K,post=G);tr|J3QKL5|J3QKL5_HUMAN(pre=K,post=G);tr|J3KT01|J3KT01_HUMAN(pre=K,post=G)…	2	746.91	1	1	2	2	5	2	2	4	0	0.996166	1	Valid
779	20160312_15_B1.10755.10755.2 File:"20160312_15_B1.raw", NativeID:"controllerType=0 controllerNumber=1 scan=10755"	AQSR+0.984EQLAALK	AQSrEQLAALK	sp|Q9UII2|ATIF1_HUMAN(pre=R,post=K)	2	608.339	1	0	2	1	3	1	0	1	0	0.839242	1	Valid
780	20160312_15_B1.10867.10867.2 File:"20160312_15_B1.raw", NativeID:"controllerType=0 controllerNumber=1 scan=10867"	NIVTPR+0.984TPPPSQGK	NIVTPrTPPPSQGK	tr|H7BYR8|H7BYR8_HUMAN(pre=K,post=G);sp|P02686|MBP_HUMAN(pre=K,post=G);sp|P02686-3|MBP_HUMAN(pre=K,post=G);sp|P02686-4|MBP_HUMAN(pre=K,post=G);sp|P02686-5|MBP_HUMAN(pre=K,post=G);sp|P02686-6|MBP_HUMAN(pre=K,post=G);tr|C9J6H1|C9J6H1_HUMAN(pre=K,post=G);tr|J3QL64|J3QL64_HUMAN(pre=K,post=G);tr|E9PJ72|E9PJ72_HUMAN(pre=K,post=G);tr|J3QKL5|J3QKL5_HUMAN(pre=K,post=G);tr|J3KT01|J3KT01_HUMAN(pre=K,post=G)…	2	746.91	1	1	1	3	5	2	2	4	0	0.996166	1	Valid
781	20160312_15_B1.10953.10953.2 File:"20160312_15_B1.raw", NativeID:"controllerType=0 controllerNumber=1 scan=10953"	LQSPSR+0.984AR+0.984GPGGSPGGLQK	LQSPSrArGPGGSPGGLQK	sp|Q96A00|PP14A_HUMAN(pre=K,post=R);sp|Q96A00-2|PP14A_HUMAN(pre=K,post=R);tr|K7EMN0|K7EMN0_HUMAN(pre=K,post=R);tr|K7EJB8|K7EJB8_HUMAN(pre=K,post=R)	2	926.488	2	1	0	3	4	0	1	1	0	0.932673	1	Valid
782	20160312_15_B1.10981.10981.2 File:"20160312_15_B1.raw", NativeID:"controllerType=0 controllerNumber=1 scan=10981"	NIVTPR+0.984TPPPSQ+0.984GK	NIVTPrTPPPSqGK	tr|H7BYR8|H7BYR8_HUMAN(pre=K,post=G);sp|P02686|MBP_HUMAN(pre=K,post=G);sp|P02686-3|MBP_HUMAN(pre=K,post=G);sp|P02686-4|MBP_HUMAN(pre=K,post=G);sp|P02686-5|MBP_HUMAN(pre=K,post=G);sp|P02686-6|MBP_HUMAN(pre=K,post=G);tr|C9J6H1|C9J6H1_HUMAN(pre=K,post=G);tr|J3QL64|J3QL64_HUMAN(pre=K,post=G);tr|E9PJ72|E9PJ72_HUMAN(pre=K,post=G);tr|J3QKL5|J3QKL5_HUMAN(pre=K,post=G);tr|J3KT01|J3KT01_HUMAN(pre=K,post=G)…	2	747.402	1	0	3	3	6	2	3	5	0	0.999245	1	Valid
783	20160312_15_B1.11173.11173.2 File:"20160312_15_B1.raw", NativeID:"controllerType=0 controllerNumber=1 scan=11173"	NIVTPR+0.984TPPPSQ+0.984GK	NIVTPrTPPPSqGK	tr|H7BYR8|H7BYR8_HUMAN(pre=K,post=G);sp|P02686|MBP_HUMAN(pre=K,post=G);sp|P02686-3|MBP_HUMAN(pre=K,post=G);sp|P02686-4|MBP_HUMAN(pre=K,post=G);sp|P02686-5|MBP_HUMAN(pre=K,post=G);sp|P02686-6|MBP_HUMAN(pre=K,post=G);tr|C9J6H1|C9J6H1_HUMAN(pre=K,post=G);tr|J3QL64|J3QL64_HUMAN(pre=K,post=G);tr|E9PJ72|E9PJ72_HUMAN(pre=K,post=G);tr|J3QKL5|J3QKL5_HUMAN(pre=K,post=G);tr|J3KT01|J3KT01_HUMAN(pre=K,post=G)…	2	747.402	1	0	1	1	2	2	1	3	0	0.878734	1	Valid
784	20160312_15_B1.1132.1132.2 File:"20160312_15_B1.raw", NativeID:"controllerType=0 controllerNumber=1 scan=1132"	DSR+0.984SGSPM+15.995AR	DSrSGSPmAR	tr|H7BYR8|H7BYR8_HUMAN(pre=R,post=R);sp|P02686|MBP_HUMAN(pre=R,post=R);sp|P02686-3|MBP_HUMAN(pre=R,post=R);sp|P02686-4|MBP_HUMAN(pre=R,post=R);sp|P02686-5|MBP_HUMAN(pre=R,post=R);sp|P02686-6|MBP_HUMAN(pre=R,post=R);tr|E9PJ72|E9PJ72_HUMAN(pre=R,post=R);tr|A8MZH3|A8MZH3_HUMAN(pre=R,post=R);tr|J3QQK6|J3QQK6_HUMAN(pre=R,post=R);tr|F8WEU6|F8WEU6_HUMAN(pre=R,post=R)	2	540.741	1	0	1	1	2	1	0	1	1	0.969442	1	Valid
785	20160312_15_B1.11703.11703.2 File:"20160312_15_B1.raw", NativeID:"controllerType=0 controllerNumber=1 scan=11703"	GGTSR+0.984ALAAASSVK	GGTSrALAAASSVK	sp|Q8N568|DCLK2_HUMAN(pre=K,post=S);sp|Q8N568-2|DCLK2_HUMAN(pre=K,post=S);sp|Q8N568-3|DCLK2_HUMAN(pre=K,post=S);tr|G5E9L9|G5E9L9_HUMAN(pre=K,post=S);tr|A0A0U1RR70|A0A0U1RR70_HUMAN(pre=K,post=S)	2	638.847	1	0	2	2	4	2	2	4	0	0.989891	1	Valid
786	20160312_15_B1.11833.11833.2 File:"20160312_15_B1.raw", NativeID:"controllerType=0 controllerNumber=1 scan=11833"	TVEMR+0.984DGEVIK	TVEMrDGEVIK	sp|P14136|GFAP_HUMAN(pre=K,post=E);tr|K7EMP8|K7EMP8_HUMAN(pre=K,post=E);tr|A0A1X7SBR3|A0A1X7SBR3_HUMAN(pre=K,post=E)	2	639.324	1	0	5	12	17	2	2	4	0	1	1	Valid
787	20160312_15_B1.12038.12038.2 File:"20160312_15_B1.raw", NativeID:"controllerType=0 controllerNumber=1 scan=12038"	TVEMR+0.984DGEVIK	TVEMrDGEVIK	sp|P14136|GFAP_HUMAN(pre=K,post=E);tr|K7EMP8|K7EMP8_HUMAN(pre=K,post=E);tr|A0A1X7SBR3|A0A1X7SBR3_HUMAN(pre=K,post=E)	2	639.324	1	0	5	4	9	1	0	1	0	0.999452	1	Valid
788	20160312_15_B1.12735.12735.3 File:"20160312_15_B1.raw", NativeID:"controllerType=0 controllerNumber=1 scan=12735"	MR+0.984EIVHIQIGQC+57.021GNQIGAK	MrEIVHIQIGQcGNQIGAK	sp|Q9H4B7|TBB1_HUMAN(pre=-,post=F)	3	718.371	1	0	2	1	3	0	0	0	0	0.731196	1	Valid
789	20160312_15_B1.1298.1298.2 File:"20160312_15_B1.raw", NativeID:"controllerType=0 controllerNumber=1 scan=1298"	DSR+0.984SGSPM+15.995AR	DSrSGSPmAR	tr|H7BYR8|H7BYR8_HUMAN(pre=R,post=R);sp|P02686|MBP_HUMAN(pre=R,post=R);sp|P02686-3|MBP_HUMAN(pre=R,post=R);sp|P02686-4|MBP_HUMAN(pre=R,post=R);sp|P02686-5|MBP_HUMAN(pre=R,post=R);sp|P02686-6|MBP_HUMAN(pre=R,post=R);tr|E9PJ72|E9PJ72_HUMAN(pre=R,post=R);tr|A8MZH3|A8MZH3_HUMAN(pre=R,post=R);tr|J3QQK6|J3QQK6_HUMAN(pre=R,post=R);tr|F8WEU6|F8WEU6_HUMAN(pre=R,post=R)	2	540.741	1	0	1	0	1	0	0	0	0	0.278664	0	Valid
790	20160312_15_B1.13207.13207.3 File:"20160312_15_B1.raw", NativeID:"controllerType=0 controllerNumber=1 scan=13207"	RLGPGTR+0.984LSLAR	RLGPGTrLSLAR	sp|P14136|GFAP_HUMAN(pre=R,post=M);sp|P14136-2|GFAP_HUMAN(pre=R,post=M);sp|P14136-3|GFAP_HUMAN(pre=R,post=M);tr|B4DIR1|B4DIR1_HUMAN(pre=R,post=M);tr|K7ELP4|K7ELP4_HUMAN(pre=R,post=M);tr|K7EMP8|K7EMP8_HUMAN(pre=R,post=M);tr|K7EKH9|K7EKH9_HUMAN(pre=R,post=M);tr|A0A1X7SCE1|A0A1X7SCE1_HUMAN(pre=R,post=M);tr|A0A1X7SBR3|A0A1X7SBR3_HUMAN(pre=R,post=M);tr|A0A1W2PR46|A0A1W2PR46_HUMAN(pre=R,post=M);tr|K7EJ…	3	433.262	1	0	5	5	10	2	2	4	0	0.999971	1	Valid
791	20160312_15_B1.13218.13218.2 File:"20160312_15_B1.raw", NativeID:"controllerType=0 controllerNumber=1 scan=13218"	RLGPGTR+0.984LSLAR	RLGPGTrLSLAR	sp|P14136|GFAP_HUMAN(pre=R,post=M);sp|P14136-2|GFAP_HUMAN(pre=R,post=M);sp|P14136-3|GFAP_HUMAN(pre=R,post=M);tr|B4DIR1|B4DIR1_HUMAN(pre=R,post=M);tr|K7ELP4|K7ELP4_HUMAN(pre=R,post=M);tr|K7EMP8|K7EMP8_HUMAN(pre=R,post=M);tr|K7EKH9|K7EKH9_HUMAN(pre=R,post=M);tr|A0A1X7SCE1|A0A1X7SCE1_HUMAN(pre=R,post=M);tr|A0A1X7SBR3|A0A1X7SBR3_HUMAN(pre=R,post=M);tr|A0A1W2PR46|A0A1W2PR46_HUMAN(pre=R,post=M);tr|K7EJ…	2	649.389	1	4	16	1	21	0	1	1	0	1	1	Valid
792	20160312_15_B1.13464.13464.2 File:"20160312_15_B1.raw", NativeID:"controllerType=0 controllerNumber=1 scan=13464"	TTSASR+0.984AVSSLATAK	TTSASrAVSSLATAK	sp|O15075|DCLK1_HUMAN(pre=K,post=G);sp|O15075-2|DCLK1_HUMAN(pre=K,post=G);tr|Q5VZY9|Q5VZY9_HUMAN(pre=K,post=G)	2	726.389	1	1	3	2	6	3	1	4	0	0.998552	1	Valid
793	20160312_15_B1.13861.13861.3 File:"20160312_15_B1.raw", NativeID:"controllerType=0 controllerNumber=1 scan=13861"	R+0.984ASLSEIGFGKMETYIK	rASLSEIGFGKMETYIK	sp|Q00537|CDK17_HUMAN(pre=R,post=L);sp|Q00537-2|CDK17_HUMAN(pre=R,post=L);tr|F5H6Z0|F5H6Z0_HUMAN(pre=R,post=L)	3	644.337	1	1	0	0	1	0	0	0	0	0.278664	0	Valid
794	20160312_15_B1.143.143.2 File:"20160312_15_B1.raw", NativeID:"controllerType=0 controllerNumber=1 scan=143"	DSR+0.984SGSPM+15.995AR	DSrSGSPmAR	tr|H7BYR8|H7BYR8_HUMAN(pre=R,post=R);sp|P02686|MBP_HUMAN(pre=R,post=R);sp|P02686-3|MBP_HUMAN(pre=R,post=R);sp|P02686-4|MBP_HUMAN(pre=R,post=R);sp|P02686-5|MBP_HUMAN(pre=R,post=R);sp|P02686-6|MBP_HUMAN(pre=R,post=R);tr|E9PJ72|E9PJ72_HUMAN(pre=R,post=R);tr|A8MZH3|A8MZH3_HUMAN(pre=R,post=R);tr|J3QQK6|J3QQK6_HUMAN(pre=R,post=R);tr|F8WEU6|F8WEU6_HUMAN(pre=R,post=R)	2	540.741	1	0	1	0	1	0	0	0	1	0.861678	1	Valid
795	20160312_15_B1.1453.1453.2 File:"20160312_15_B1.raw", NativeID:"controllerType=0 controllerNumber=1 scan=1453"	DSR+0.984SGSPM+15.995AR	DSrSGSPmAR	tr|H7BYR8|H7BYR8_HUMAN(pre=R,post=R);sp|P02686|MBP_HUMAN(pre=R,post=R);sp|P02686-3|MBP_HUMAN(pre=R,post=R);sp|P02686-4|MBP_HUMAN(pre=R,post=R);sp|P02686-5|MBP_HUMAN(pre=R,post=R);sp|P02686-6|MBP_HUMAN(pre=R,post=R);tr|E9PJ72|E9PJ72_HUMAN(pre=R,post=R);tr|A8MZH3|A8MZH3_HUMAN(pre=R,post=R);tr|J3QQK6|J3QQK6_HUMAN(pre=R,post=R);tr|F8WEU6|F8WEU6_HUMAN(pre=R,post=R)	2	540.741	1	0	0	0	0	0	0	0	0	0.127083	0	Valid
796	20160312_15_B1.15049.15049.2 File:"20160312_15_B1.raw", NativeID:"controllerType=0 controllerNumber=1 scan=15049"	STLAR+0.984VIVDK	STLArVIVDK	tr|K7ERC4|K7ERC4_HUMAN(pre=K,post=Y);tr|C9K0L8|C9K0L8_HUMAN(pre=K,post=Y);tr|K7ERZ0|K7ERZ0_HUMAN(pre=K,post=Y);tr|K7EN66|K7EN66_HUMAN(pre=K,post=Y);sp|P09543|CN37_HUMAN(pre=K,post=Y);sp|P09543-2|CN37_HUMAN(pre=K,post=Y)	2	551.828	1	0	4	4	8	2	3	5	0	0.999893	1	Valid
797	20160312_15_B1.15130.15130.2 File:"20160312_15_B1.raw", NativeID:"controllerType=0 controllerNumber=1 scan=15130"	LYFHLHYSR+0.984	LYFHLHYSr	sp|B2RXF0|T229A_HUMAN(pre=K,post=G)	2	618.812	1	0	0	0	0	0	0	0	0	0.127083	0	Valid
798	20160312_15_B1.15217.15217.2 File:"20160312_15_B1.raw", NativeID:"controllerType=0 controllerNumber=1 scan=15217"	STLAR+0.984VIVDK	STLArVIVDK	tr|K7ERC4|K7ERC4_HUMAN(pre=K,post=Y);tr|C9K0L8|C9K0L8_HUMAN(pre=K,post=Y);tr|K7ERZ0|K7ERZ0_HUMAN(pre=K,post=Y);tr|K7EN66|K7EN66_HUMAN(pre=K,post=Y);sp|P09543|CN37_HUMAN(pre=K,post=Y);sp|P09543-2|CN37_HUMAN(pre=K,post=Y)	2	551.828	1	0	4	3	7	2	2	4	0	0.999454	1	Valid
799	20160312_15_B1.1638.1638.2 File:"20160312_15_B1.raw", NativeID:"controllerType=0 controllerNumber=1 scan=1638"	DSR+0.984SGSPM+15.995AR	DSrSGSPmAR	tr|H7BYR8|H7BYR8_HUMAN(pre=R,post=R);sp|P02686|MBP_HUMAN(pre=R,post=R);sp|P02686-3|MBP_HUMAN(pre=R,post=R);sp|P02686-4|MBP_HUMAN(pre=R,post=R);sp|P02686-5|MBP_HUMAN(pre=R,post=R);sp|P02686-6|MBP_HUMAN(pre=R,post=R);tr|E9PJ72|E9PJ72_HUMAN(pre=R,post=R);tr|A8MZH3|A8MZH3_HUMAN(pre=R,post=R);tr|J3QQK6|J3QQK6_HUMAN(pre=R,post=R);tr|F8WEU6|F8WEU6_HUMAN(pre=R,post=R)	2	540.741	1	0	1	1	2	1	0	1	1	0.969442	1	Valid
800	20160312_15_B1.17594.17594.3 File:"20160312_15_B1.raw", NativeID:"controllerType=0 controllerNumber=1 scan=17594"	AAVEALQSQALHATSQQPLR+0.984K	AAVEALQSQALHATSQQPLrK	sp|Q92599|SEPT8_HUMAN(pre=K,post=D);sp|Q92599-2|SEPT8_HUMAN(pre=K,post=D);sp|Q92599-3|SEPT8_HUMAN(pre=K,post=D);sp|Q92599-4|SEPT8_HUMAN(pre=K,post=D);tr|F8W8I8|F8W8I8_HUMAN(pre=K,post=D);tr|A6NMH6|A6NMH6_HUMAN(pre=K,post=D);tr|A6NFQ9|A6NFQ9_HUMAN(pre=K,post=D);tr|A0A087X142|A0A087X142_HUMAN(pre=K,post=D)	3	750.074	1	0	7	1	8	0	2	2	0	0.999242	1	Valid
801	20160312_15_B1.1875.1875.2 File:"20160312_15_B1.raw", NativeID:"controllerType=0 controllerNumber=1 scan=1875"	DSR+0.984SGSPM+15.995AR+0.984R	DSrSGSPmArR	tr|H7BYR8|H7BYR8_HUMAN(pre=R,post=-);sp|P02686|MBP_HUMAN(pre=R,post=-);sp|P02686-3|MBP_HUMAN(pre=R,post=-);sp|P02686-4|MBP_HUMAN(pre=R,post=-);sp|P02686-5|MBP_HUMAN(pre=R,post=-);sp|P02686-6|MBP_HUMAN(pre=R,post=-);tr|E9PJ72|E9PJ72_HUMAN(pre=R,post=-);tr|A8MZH3|A8MZH3_HUMAN(pre=R,post=-);tr|J3QQK6|J3QQK6_HUMAN(pre=R,post=-);tr|F8WEU6|F8WEU6_HUMAN(pre=R,post=-)	2	619.284	2	0	4	0	4	0	0	0	0	0.878318	1	Valid
802	20160312_15_B1.1938.1938.2 File:"20160312_15_B1.raw", NativeID:"controllerType=0 controllerNumber=1 scan=1938"	DSR+0.984SGSPM+15.995AR	DSrSGSPmAR	tr|H7BYR8|H7BYR8_HUMAN(pre=R,post=R);sp|P02686|MBP_HUMAN(pre=R,post=R);sp|P02686-3|MBP_HUMAN(pre=R,post=R);sp|P02686-4|MBP_HUMAN(pre=R,post=R);sp|P02686-5|MBP_HUMAN(pre=R,post=R);sp|P02686-6|MBP_HUMAN(pre=R,post=R);tr|E9PJ72|E9PJ72_HUMAN(pre=R,post=R);tr|A8MZH3|A8MZH3_HUMAN(pre=R,post=R);tr|J3QQK6|J3QQK6_HUMAN(pre=R,post=R);tr|F8WEU6|F8WEU6_HUMAN(pre=R,post=R)	2	540.741	1	0	1	0	1	0	0	0	0	0.278664	0	Valid
803	20160312_15_B1.2019.2019.2 File:"20160312_15_B1.raw", NativeID:"controllerType=0 controllerNumber=1 scan=2019"	DSR+0.984SGSPM+15.995AR+0.984R	DSrSGSPmArR	tr|H7BYR8|H7BYR8_HUMAN(pre=R,post=-);sp|P02686|MBP_HUMAN(pre=R,post=-);sp|P02686-3|MBP_HUMAN(pre=R,post=-);sp|P02686-4|MBP_HUMAN(pre=R,post=-);sp|P02686-5|MBP_HUMAN(pre=R,post=-);sp|P02686-6|MBP_HUMAN(pre=R,post=-);tr|E9PJ72|E9PJ72_HUMAN(pre=R,post=-);tr|A8MZH3|A8MZH3_HUMAN(pre=R,post=-);tr|J3QQK6|J3QQK6_HUMAN(pre=R,post=-);tr|F8WEU6|F8WEU6_HUMAN(pre=R,post=-)	2	619.284	2	0	5	0	5	0	0	0	1	0.996773	1	Valid
804	20160312_15_B1.2252.2252.2 File:"20160312_15_B1.raw", NativeID:"controllerType=0 controllerNumber=1 scan=2252"	DSR+0.984SGSPM+15.995AR	DSrSGSPmAR	tr|H7BYR8|H7BYR8_HUMAN(pre=R,post=R);sp|P02686|MBP_HUMAN(pre=R,post=R);sp|P02686-3|MBP_HUMAN(pre=R,post=R);sp|P02686-4|MBP_HUMAN(pre=R,post=R);sp|P02686-5|MBP_HUMAN(pre=R,post=R);sp|P02686-6|MBP_HUMAN(pre=R,post=R);tr|E9PJ72|E9PJ72_HUMAN(pre=R,post=R);tr|A8MZH3|A8MZH3_HUMAN(pre=R,post=R);tr|J3QQK6|J3QQK6_HUMAN(pre=R,post=R);tr|F8WEU6|F8WEU6_HUMAN(pre=R,post=R)	2	540.741	1	0	1	0	1	0	0	0	1	0.861678	1	Valid
805	20160312_15_B1.23851.23851.4 File:"20160312_15_B1.raw", NativeID:"controllerType=0 controllerNumber=1 scan=23851"	DFLIYEYR+0.984NGHQEVESPFQGR	DFLIYEYrNGHQEVESPFQGR	sp|Q9NY72|SCN3B_HUMAN(pre=K,post=L);tr|E9PJP6|E9PJP6_HUMAN(pre=K,post=L);tr|E9PQS8|E9PQS8_HUMAN(pre=K,post=L)	4	647.057	1	0	0	0	0	0	0	0	0	0.127083	0	Ambiguous
806	20160312_15_B1.23894.23894.3 File:"20160312_15_B1.raw", NativeID:"controllerType=0 controllerNumber=1 scan=23894"	DFLIYEYR+0.984NGHQEVESPFQGR	DFLIYEYrNGHQEVESPFQGR	sp|Q9NY72|SCN3B_HUMAN(pre=K,post=L);tr|E9PJP6|E9PJP6_HUMAN(pre=K,post=L);tr|E9PQS8|E9PQS8_HUMAN(pre=K,post=L)	3	862.407	1	0	0	0	0	0	0	0	0	0.127083	0	Ambiguous
807	20160312_15_B1.2391.2391.2 File:"20160312_15_B1.raw", NativeID:"controllerType=0 controllerNumber=1 scan=2391"	SGSPMAR+0.984R	SGSPMArR	tr|H7BYR8|H7BYR8_HUMAN(pre=R,post=-);sp|P02686|MBP_HUMAN(pre=R,post=-);sp|P02686-3|MBP_HUMAN(pre=R,post=-);sp|P02686-4|MBP_HUMAN(pre=R,post=-);sp|P02686-5|MBP_HUMAN(pre=R,post=-);sp|P02686-6|MBP_HUMAN(pre=R,post=-);tr|E9PJ72|E9PJ72_HUMAN(pre=R,post=-);tr|A8MZH3|A8MZH3_HUMAN(pre=R,post=-);tr|J3QQK6|J3QQK6_HUMAN(pre=R,post=-);tr|F8WEU6|F8WEU6_HUMAN(pre=R,post=-)	2	431.714	1	0	4	0	4	0	0	0	0	0.878318	1	Valid
808	20160312_15_B1.24576.24576.3 File:"20160312_15_B1.raw", NativeID:"controllerType=0 controllerNumber=1 scan=24576"	EILSPVDIIDR+0.984NN+0.984HHNMM	EILSPVDIIDrNnHHNMM	sp|O14495|PLPP3_HUMAN(pre=K,post=-)	3	717.339	1	0	0	0	0	0	0	0	0	0.127083	0	Ambiguous
809	20160312_15_B1.24970.24970.3 File:"20160312_15_B1.raw", NativeID:"controllerType=0 controllerNumber=1 scan=24970"	LGIVQ+0.984GIVGAR+0.984N+0.984TSAASTAQLVEATEELR	LGIVqGIVGArnTSAASTAQLVEATEELR	sp|P55268|LAMB2_HUMAN(pre=K,post=R)	3	986.52	1	0	0	2	2	0	0	0	0	0.5062	1	Valid
810	20160312_15_B1.25248.25248.4 File:"20160312_15_B1.raw", NativeID:"controllerType=0 controllerNumber=1 scan=25248"	IWHHTFYNELR+0.984VAPEEHPVLLTEAPLNPK	IWHHTFYNELrVAPEEHPVLLTEAPLNPK	tr|I3L4N8|I3L4N8_HUMAN(pre=K,post=A);sp|P63261|ACTG_HUMAN(pre=K,post=A);sp|P60709|ACTB_HUMAN(pre=K,post=A);tr|I3L3I0|I3L3I0_HUMAN(pre=K,post=A);tr|G5E9R0|G5E9R0_HUMAN(pre=K,post=A);tr|A0A2R8Y793|A0A2R8Y793_HUMAN(pre=K,post=A);tr|J3KT65|J3KT65_HUMAN(pre=K,post=A);tr|E7EVS6|E7EVS6_HUMAN(pre=K,post=A);tr|I3L1U9|I3L1U9_HUMAN(pre=K,post=A);tr|K7EM38|K7EM38_HUMAN(pre=K,post=A);tr|I3L3R2|I3L3R2_HUMAN(pr…	4	863.701	1	0	3	1	4	2	0	2	0	0.96375	1	Valid
811	20160312_15_B1.25255.25255.3 File:"20160312_15_B1.raw", NativeID:"controllerType=0 controllerNumber=1 scan=25255"	IWHHTFYNELR+0.984VAPEEHPVLLTEAPLNPK	IWHHTFYNELrVAPEEHPVLLTEAPLNPK	tr|I3L4N8|I3L4N8_HUMAN(pre=K,post=A);sp|P63261|ACTG_HUMAN(pre=K,post=A);sp|P60709|ACTB_HUMAN(pre=K,post=A);tr|I3L3I0|I3L3I0_HUMAN(pre=K,post=A);tr|G5E9R0|G5E9R0_HUMAN(pre=K,post=A);tr|A0A2R8Y793|A0A2R8Y793_HUMAN(pre=K,post=A);tr|J3KT65|J3KT65_HUMAN(pre=K,post=A);tr|E7EVS6|E7EVS6_HUMAN(pre=K,post=A);tr|I3L1U9|I3L1U9_HUMAN(pre=K,post=A);tr|K7EM38|K7EM38_HUMAN(pre=K,post=A);tr|I3L3R2|I3L3R2_HUMAN(pr…	3	1151.27	1	0	0	1	1	0	0	0	0	0.278664	0	Valid
812	20160312_15_B1.25289.25289.3 File:"20160312_15_B1.raw", NativeID:"controllerType=0 controllerNumber=1 scan=25289"	IREEYPDR+0.984IMNTFSVVPSPK	IREEYPDrIMNTFSVVPSPK	sp|P07437|TBB5_HUMAN(pre=K,post=V);sp|P68371|TBB4B_HUMAN(pre=K,post=V);tr|Q5ST81|Q5ST81_HUMAN(pre=K,post=V);tr|Q5JP53|Q5JP53_HUMAN(pre=K,post=V)	3	793.739	1	0	5	3	8	0	3	3	0	0.999605	1	Valid
813	20160312_15_B1.25337.25337.2 File:"20160312_15_B1.raw", NativeID:"controllerType=0 controllerNumber=1 scan=25337"	IREEYPDR+0.984IMNTFSVVPSPK	IREEYPDrIMNTFSVVPSPK	sp|P07437|TBB5_HUMAN(pre=K,post=V);sp|P68371|TBB4B_HUMAN(pre=K,post=V);tr|Q5ST81|Q5ST81_HUMAN(pre=K,post=V);tr|Q5JP53|Q5JP53_HUMAN(pre=K,post=V)	2	1190.1	1	1	0	2	3	0	0	0	0	0.731196	1	Valid
814	20160312_15_B1.2536.2536.2 File:"20160312_15_B1.raw", NativeID:"controllerType=0 controllerNumber=1 scan=2536"	SGSPMAR+0.984R	SGSPMArR	tr|H7BYR8|H7BYR8_HUMAN(pre=R,post=-);sp|P02686|MBP_HUMAN(pre=R,post=-);sp|P02686-3|MBP_HUMAN(pre=R,post=-);sp|P02686-4|MBP_HUMAN(pre=R,post=-);sp|P02686-5|MBP_HUMAN(pre=R,post=-);sp|P02686-6|MBP_HUMAN(pre=R,post=-);tr|E9PJ72|E9PJ72_HUMAN(pre=R,post=-);tr|A8MZH3|A8MZH3_HUMAN(pre=R,post=-);tr|J3QQK6|J3QQK6_HUMAN(pre=R,post=-);tr|F8WEU6|F8WEU6_HUMAN(pre=R,post=-)	2	431.714	1	0	4	2	6	1	0	1	0	0.989852	1	Valid
815	20160312_15_B1.25506.25506.3 File:"20160312_15_B1.raw", NativeID:"controllerType=0 controllerNumber=1 scan=25506"	IREEYPDR+0.984IMNTFSVMPSPK	IREEYPDrIMNTFSVMPSPK	sp|Q9BVA1|TBB2B_HUMAN(pre=K,post=V);sp|Q13885|TBB2A_HUMAN(pre=K,post=V)	3	804.397	1	0	3	3	6	0	3	3	0	0.997224	1	Valid
816	20160312_15_B1.25556.25556.2 File:"20160312_15_B1.raw", NativeID:"controllerType=0 controllerNumber=1 scan=25556"	IREEYPDR+0.984IMNTFSVMPSPK	IREEYPDrIMNTFSVMPSPK	sp|Q9BVA1|TBB2B_HUMAN(pre=K,post=V);sp|Q13885|TBB2A_HUMAN(pre=K,post=V)	2	1206.09	1	1	0	0	1	0	0	0	0	0.278664	0	Valid
817	20160312_15_B1.26067.26067.3 File:"20160312_15_B1.raw", NativeID:"controllerType=0 controllerNumber=1 scan=26067"	ELQEQLAR+0.984QQVHVELDVAKPDLTAALK	ELQEQLArQQVHVELDVAKPDLTAALK	sp|P14136|GFAP_HUMAN(pre=R,post=E);sp|P14136-2|GFAP_HUMAN(pre=R,post=E);sp|P14136-3|GFAP_HUMAN(pre=R,post=E);tr|K7EMP8|K7EMP8_HUMAN(pre=R,post=E);tr|K7EKH9|K7EKH9_HUMAN(pre=R,post=E);tr|A0A1X7SCE1|A0A1X7SCE1_HUMAN(pre=R,post=E);tr|A0A1W2PRT3|A0A1W2PRT3_HUMAN(pre=R,post=E);tr|A0A1X7SBR3|A0A1X7SBR3_HUMAN(pre=R,post=E);tr|A0A1W2PR46|A0A1W2PR46_HUMAN(pre=R,post=E)	3	1015.22	1	0	0	0	0	0	1	1	0	0.218385	0	Ambiguous
818	20160312_15_B1.261.261.2 File:"20160312_15_B1.raw", NativeID:"controllerType=0 controllerNumber=1 scan=261"	DSR+0.984SGSPM+15.995AR	DSrSGSPmAR	tr|H7BYR8|H7BYR8_HUMAN(pre=R,post=R);sp|P02686|MBP_HUMAN(pre=R,post=R);sp|P02686-3|MBP_HUMAN(pre=R,post=R);sp|P02686-4|MBP_HUMAN(pre=R,post=R);sp|P02686-5|MBP_HUMAN(pre=R,post=R);sp|P02686-6|MBP_HUMAN(pre=R,post=R);tr|E9PJ72|E9PJ72_HUMAN(pre=R,post=R);tr|A8MZH3|A8MZH3_HUMAN(pre=R,post=R);tr|J3QQK6|J3QQK6_HUMAN(pre=R,post=R);tr|F8WEU6|F8WEU6_HUMAN(pre=R,post=R)	2	540.741	1	0	1	2	3	2	0	2	1	0.993849	1	Valid
819	20160312_15_B1.2683.2683.2 File:"20160312_15_B1.raw", NativeID:"controllerType=0 controllerNumber=1 scan=2683"	SGSPMAR+0.984R	SGSPMArR	tr|H7BYR8|H7BYR8_HUMAN(pre=R,post=-);sp|P02686|MBP_HUMAN(pre=R,post=-);sp|P02686-3|MBP_HUMAN(pre=R,post=-);sp|P02686-4|MBP_HUMAN(pre=R,post=-);sp|P02686-5|MBP_HUMAN(pre=R,post=-);sp|P02686-6|MBP_HUMAN(pre=R,post=-);tr|E9PJ72|E9PJ72_HUMAN(pre=R,post=-);tr|A8MZH3|A8MZH3_HUMAN(pre=R,post=-);tr|J3QQK6|J3QQK6_HUMAN(pre=R,post=-);tr|F8WEU6|F8WEU6_HUMAN(pre=R,post=-)	2	431.714	1	0	5	2	7	1	0	1	0	0.996151	1	Valid
820	20160312_15_B1.27.27.2 File:"20160312_15_B1.raw", NativeID:"controllerType=0 controllerNumber=1 scan=27"	DSR+0.984SGSPM+15.995AR	DSrSGSPmAR	tr|H7BYR8|H7BYR8_HUMAN(pre=R,post=R);sp|P02686|MBP_HUMAN(pre=R,post=R);sp|P02686-3|MBP_HUMAN(pre=R,post=R);sp|P02686-4|MBP_HUMAN(pre=R,post=R);sp|P02686-5|MBP_HUMAN(pre=R,post=R);sp|P02686-6|MBP_HUMAN(pre=R,post=R);tr|E9PJ72|E9PJ72_HUMAN(pre=R,post=R);tr|A8MZH3|A8MZH3_HUMAN(pre=R,post=R);tr|J3QQK6|J3QQK6_HUMAN(pre=R,post=R);tr|F8WEU6|F8WEU6_HUMAN(pre=R,post=R)	2	540.741	1	0	1	0	1	0	0	0	1	0.861678	1	Valid
821	20160312_15_B1.27373.27373.3 File:"20160312_15_B1.raw", NativeID:"controllerType=0 controllerNumber=1 scan=27373"	IREEFPDR+0.984IMNTFSVVPSPK	IREEFPDrIMNTFSVVPSPK	sp|P04350|TBB4A_HUMAN(pre=K,post=V);tr|M0R042|M0R042_HUMAN(pre=K,post=V);tr|M0QYM7|M0QYM7_HUMAN(pre=K,post=V)	3	788.408	1	0	2	3	5	0	3	3	0	0.992668	1	Valid
822	20160312_15_B1.27407.27407.3 File:"20160312_15_B1.raw", NativeID:"controllerType=0 controllerNumber=1 scan=27407"	DSGRDVPLTQYQR+0.984DFGLWTTPAGPK	DSGRDVPLTQYQrDFGLWTTPAGPK	sp|Q9H9H5|MA6D1_HUMAN(pre=R,post=D);tr|C9JPF8|C9JPF8_HUMAN(pre=R,post=D);tr|H7BZQ6|H7BZQ6_HUMAN(pre=R,post=D)	3	936.132	1	0	0	0	0	0	0	0	0	0.127083	0	Ambiguous
823	20160312_15_B1.27441.27441.2 File:"20160312_15_B1.raw", NativeID:"controllerType=0 controllerNumber=1 scan=27441"	HVPR+0.984AVFVDLEPTVIDEVR	HVPrAVFVDLEPTVIDEVR	sp|P68363|TBA1B_HUMAN(pre=K,post=T);sp|P68363-2|TBA1B_HUMAN(pre=K,post=T);sp|Q9BQE3|TBA1C_HUMAN(pre=K,post=T);sp|Q71U36|TBA1A_HUMAN(pre=K,post=T);sp|Q71U36-2|TBA1A_HUMAN(pre=K,post=T);tr|F8VVB9|F8VVB9_HUMAN(pre=K,post=T);tr|F5H5D3|F5H5D3_HUMAN(pre=K,post=T);tr|F8VQQ4|F8VQQ4_HUMAN(pre=K,post=T);tr|F8VX09|F8VX09_HUMAN(pre=K,post=T);tr|F8VRK0|F8VRK0_HUMAN(pre=K,post=T);tr|F8VRZ4|F8VRZ4_HUMAN(pre=K,p…	2	1096.59	1	0	1	1	2	2	1	3	0	0.878734	1	Valid
824	20160312_15_B1.28380.28380.2 File:"20160312_15_B1.raw", NativeID:"controllerType=0 controllerNumber=1 scan=28380"	GSQQYR+0.984ALTVPELTQQVFDAK	GSQQYrALTVPELTQQVFDAK	sp|P07437|TBB5_HUMAN(pre=R,post=N);tr|Q5ST81|Q5ST81_HUMAN(pre=R,post=N);tr|Q5JP53|Q5JP53_HUMAN(pre=R,post=N)	2	1190.61	1	0	1	0	1	0	0	0	0	0.278664	0	Ambiguous
825	20160312_15_B1.28495.28495.3 File:"20160312_15_B1.raw", NativeID:"controllerType=0 controllerNumber=1 scan=28495"	LLEGEENRITIPVQTFSNLQIR+0.984ETSLDTK	LLEGEENRITIPVQTFSNLQIrETSLDTK	sp|P14136|GFAP_HUMAN(pre=K,post=S);tr|K7EMP8|K7EMP8_HUMAN(pre=K,post=S);tr|A0A1W2PPA3|A0A1W2PPA3_HUMAN(pre=K,post=S);tr|A0A1W2PRT3|A0A1W2PRT3_HUMAN(pre=K,post=S);tr|K7EPI4|K7EPI4_HUMAN(pre=K,post=S);tr|A0A1W2PR46|A0A1W2PR46_HUMAN(pre=K,post=S)	3	1115.92	1	0	1	1	2	0	0	0	0	0.5062	1	Valid
826	20160312_15_B1.28563.28563.3 File:"20160312_15_B1.raw", NativeID:"controllerType=0 controllerNumber=1 scan=28563"	GSQQYR+0.984ALTVPELTQQMFDAK	GSQQYrALTVPELTQQMFDAK	sp|P04350|TBB4A_HUMAN(pre=R,post=N);sp|Q13509|TBB3_HUMAN(pre=R,post=N);sp|Q13509-2|TBB3_HUMAN(pre=R,post=N);sp|P68371|TBB4B_HUMAN(pre=R,post=N);tr|A0A0B4J269|A0A0B4J269_HUMAN(pre=R,post=N)	3	804.734	1	0	0	0	0	0	0	0	0	0.127083	0	Ambiguous
827	20160312_15_B1.28593.28593.2 File:"20160312_15_B1.raw", NativeID:"controllerType=0 controllerNumber=1 scan=28593"	GSQQYR+0.984ALTVPELTQQMFDAK	GSQQYrALTVPELTQQMFDAK	sp|P04350|TBB4A_HUMAN(pre=R,post=N);sp|Q13509|TBB3_HUMAN(pre=R,post=N);sp|Q13509-2|TBB3_HUMAN(pre=R,post=N);sp|P68371|TBB4B_HUMAN(pre=R,post=N);tr|A0A0B4J269|A0A0B4J269_HUMAN(pre=R,post=N)	2	1206.6	1	0	0	0	0	0	0	0	0	0.127083	0	Ambiguous
828	20160312_15_B1.28729.28729.3 File:"20160312_15_B1.raw", NativeID:"controllerType=0 controllerNumber=1 scan=28729"	GSQQYR+0.984ALTVPELTQQMFDAK	GSQQYrALTVPELTQQMFDAK	sp|P04350|TBB4A_HUMAN(pre=R,post=N);sp|Q13509|TBB3_HUMAN(pre=R,post=N);sp|Q13509-2|TBB3_HUMAN(pre=R,post=N);sp|P68371|TBB4B_HUMAN(pre=R,post=N);tr|A0A0B4J269|A0A0B4J269_HUMAN(pre=R,post=N)	3	804.734	1	0	0	1	1	0	0	0	0	0.278664	0	Valid
829	20160312_15_B1.29811.29811.4 File:"20160312_15_B1.raw", NativeID:"controllerType=0 controllerNumber=1 scan=29811"	EASMEGIVTIVGLKPETTYAVR+0.984LAALNGK	EASMEGIVTIVGLKPETTYAVrLAALNGK	sp|P13591|NCAM1_HUMAN(pre=K,post=G);sp|P13591-1|NCAM1_HUMAN(pre=K,post=G);sp|P13591-3|NCAM1_HUMAN(pre=K,post=G);sp|P13591-4|NCAM1_HUMAN(pre=K,post=G);sp|P13591-5|NCAM1_HUMAN(pre=K,post=G);tr|A0A087WV75|A0A087WV75_HUMAN(pre=K,post=G);tr|A0A087WWD4|A0A087WWD4_HUMAN(pre=K,post=G);tr|A0A087WTF6|A0A087WTF6_HUMAN(pre=K,post=G);tr|A0A087X1V2|A0A087X1V2_HUMAN(pre=K,post=G);tr|A0A087WTE4|A0A087WTE4_HUMAN(…	4	758.914	1	0	1	0	1	0	0	0	0	0.278664	0	Ambiguous
830	20160312_15_B1.31198.31198.3 File:"20160312_15_B1.raw", NativeID:"controllerType=0 controllerNumber=1 scan=31198"	GDRTGRYGATDR+0.984SQDDGGENRSR	GDRTGRYGATDrSQDDGGENRSR	sp|P98175|RBM10_HUMAN(pre=R,post=D);sp|P98175-2|RBM10_HUMAN(pre=R,post=D);sp|P98175-3|RBM10_HUMAN(pre=R,post=D);sp|P98175-4|RBM10_HUMAN(pre=R,post=D);sp|P98175-5|RBM10_HUMAN(pre=R,post=D)	3	843.048	1	0	0	0	0	0	1	1	0	0.218385	0	Valid
831	20160312_15_B1.32406.32406.3 File:"20160312_15_B1.raw", NativeID:"controllerType=0 controllerNumber=1 scan=32406"	R+0.984SYSSSSGSLMPSLENLDLSQVAAISNDLK	rSYSSSSGSLMPSLENLDLSQVAAISNDLK	sp|P07196|NFL_HUMAN(pre=R,post=S);tr|A0A0S2Z436|A0A0S2Z436_HUMAN(pre=R,post=S);tr|A0A087X0W2|A0A087X0W2_HUMAN(pre=R,post=S)	3	1057.52	1	0	0	0	0	0	0	0	0	0.127083	0	Ambiguous
832	20160312_15_B1.3272.3272.2 File:"20160312_15_B1.raw", NativeID:"controllerType=0 controllerNumber=1 scan=3272"	VSR+0.984VASPK	VSrVASPK	sp|P46821|MAP1B_HUMAN(pre=K,post=K)	2	422.749	1	0	3	2	5	4	0	4	0	0.996166	1	Valid
833	20160312_15_B1.3418.3418.2 File:"20160312_15_B1.raw", NativeID:"controllerType=0 controllerNumber=1 scan=3418"	TVTNDR+0.984SAPR	TVTNDrSAPR	sp|Q765P7|MTSSL_HUMAN(pre=R,post=I);tr|A0A087WXN9|A0A087WXN9_HUMAN(pre=R,post=I)	2	559.284	1	0	3	1	4	1	0	1	0	0.932673	1	Valid
834	20160312_15_B1.3527.3527.2 File:"20160312_15_B1.raw", NativeID:"controllerType=0 controllerNumber=1 scan=3527"	DSR+0.984SGSPMAR	DSrSGSPMAR	tr|H7BYR8|H7BYR8_HUMAN(pre=R,post=R);sp|P02686|MBP_HUMAN(pre=R,post=R);sp|P02686-3|MBP_HUMAN(pre=R,post=R);sp|P02686-4|MBP_HUMAN(pre=R,post=R);sp|P02686-5|MBP_HUMAN(pre=R,post=R);sp|P02686-6|MBP_HUMAN(pre=R,post=R);tr|E9PJ72|E9PJ72_HUMAN(pre=R,post=R);tr|A8MZH3|A8MZH3_HUMAN(pre=R,post=R);tr|J3QQK6|J3QQK6_HUMAN(pre=R,post=R);tr|F8WEU6|F8WEU6_HUMAN(pre=R,post=R)	2	532.744	1	0	4	2	6	4	0	4	0	0.998552	1	Valid
835	20160312_15_B1.3555.3555.2 File:"20160312_15_B1.raw", NativeID:"controllerType=0 controllerNumber=1 scan=3555"	GTGAR+0.984PYTGK	GTGArPYTGK	sp|P49588|SYAC_HUMAN(pre=K,post=V);sp|P49588-2|SYAC_HUMAN(pre=K,post=V)	2	504.76	1	0	1	0	1	0	0	0	0	0.278664	0	Valid
836	20160312_15_B1.3568.3568.2 File:"20160312_15_B1.raw", NativeID:"controllerType=0 controllerNumber=1 scan=3568"	GTGAR+0.984PYTGK	GTGArPYTGK	sp|P49588|SYAC_HUMAN(pre=K,post=V);sp|P49588-2|SYAC_HUMAN(pre=K,post=V)	2	504.76	1	0	0	0	0	0	0	0	0	0.127083	0	Ambiguous
837	20160312_15_B1.36063.36063.2 File:"20160312_15_B1.raw", NativeID:"controllerType=0 controllerNumber=1 scan=36063"	HLN+0.984LGMN+0.984R+0.984LN+0.984TLPR	HLnLGMnrLnTLPR	sp|Q15404|RSU1_HUMAN(pre=K,post=G);sp|Q15404-2|RSU1_HUMAN(pre=K,post=G)	2	826.925	1	0	1	0	1	0	0	0	0	0.278664	0	Valid
838	20160312_15_B1.3611.3611.2 File:"20160312_15_B1.raw", NativeID:"controllerType=0 controllerNumber=1 scan=3611"	DSR+0.984SGSPM+15.995AR	DSrSGSPmAR	tr|H7BYR8|H7BYR8_HUMAN(pre=R,post=R);sp|P02686|MBP_HUMAN(pre=R,post=R);sp|P02686-3|MBP_HUMAN(pre=R,post=R);sp|P02686-4|MBP_HUMAN(pre=R,post=R);sp|P02686-5|MBP_HUMAN(pre=R,post=R);sp|P02686-6|MBP_HUMAN(pre=R,post=R);tr|E9PJ72|E9PJ72_HUMAN(pre=R,post=R);tr|A8MZH3|A8MZH3_HUMAN(pre=R,post=R);tr|J3QQK6|J3QQK6_HUMAN(pre=R,post=R);tr|F8WEU6|F8WEU6_HUMAN(pre=R,post=R)	2	540.741	1	0	1	1	2	2	0	2	1	0.983841	1	Valid
839	20160312_15_B1.3679.3679.2 File:"20160312_15_B1.raw", NativeID:"controllerType=0 controllerNumber=1 scan=3679"	DSR+0.984SGSPMAR	DSrSGSPMAR	tr|H7BYR8|H7BYR8_HUMAN(pre=R,post=R);sp|P02686|MBP_HUMAN(pre=R,post=R);sp|P02686-3|MBP_HUMAN(pre=R,post=R);sp|P02686-4|MBP_HUMAN(pre=R,post=R);sp|P02686-5|MBP_HUMAN(pre=R,post=R);sp|P02686-6|MBP_HUMAN(pre=R,post=R);tr|E9PJ72|E9PJ72_HUMAN(pre=R,post=R);tr|A8MZH3|A8MZH3_HUMAN(pre=R,post=R);tr|J3QQK6|J3QQK6_HUMAN(pre=R,post=R);tr|F8WEU6|F8WEU6_HUMAN(pre=R,post=R)	2	532.744	1	0	4	2	6	4	0	4	0	0.998552	1	Valid
840	20160312_15_B1.381.381.2 File:"20160312_15_B1.raw", NativeID:"controllerType=0 controllerNumber=1 scan=381"	DSR+0.984SGSPM+15.995AR	DSrSGSPmAR	tr|H7BYR8|H7BYR8_HUMAN(pre=R,post=R);sp|P02686|MBP_HUMAN(pre=R,post=R);sp|P02686-3|MBP_HUMAN(pre=R,post=R);sp|P02686-4|MBP_HUMAN(pre=R,post=R);sp|P02686-5|MBP_HUMAN(pre=R,post=R);sp|P02686-6|MBP_HUMAN(pre=R,post=R);tr|E9PJ72|E9PJ72_HUMAN(pre=R,post=R);tr|A8MZH3|A8MZH3_HUMAN(pre=R,post=R);tr|J3QQK6|J3QQK6_HUMAN(pre=R,post=R);tr|F8WEU6|F8WEU6_HUMAN(pre=R,post=R)	2	540.741	1	0	2	2	4	2	0	2	1	0.997673	1	Valid
841	20160312_15_B1.3844.3844.2 File:"20160312_15_B1.raw", NativeID:"controllerType=0 controllerNumber=1 scan=3844"	DSR+0.984SGSPMAR	DSrSGSPMAR	tr|H7BYR8|H7BYR8_HUMAN(pre=R,post=R);sp|P02686|MBP_HUMAN(pre=R,post=R);sp|P02686-3|MBP_HUMAN(pre=R,post=R);sp|P02686-4|MBP_HUMAN(pre=R,post=R);sp|P02686-5|MBP_HUMAN(pre=R,post=R);sp|P02686-6|MBP_HUMAN(pre=R,post=R);tr|E9PJ72|E9PJ72_HUMAN(pre=R,post=R);tr|A8MZH3|A8MZH3_HUMAN(pre=R,post=R);tr|J3QQK6|J3QQK6_HUMAN(pre=R,post=R);tr|F8WEU6|F8WEU6_HUMAN(pre=R,post=R)	2	532.744	1	0	1	0	1	0	0	0	0	0.278664	0	Valid
842	20160312_15_B1.4042.4042.2 File:"20160312_15_B1.raw", NativeID:"controllerType=0 controllerNumber=1 scan=4042"	DR+0.984NVATPR	DrNVATPR	sp|P11216|PYGB_HUMAN(pre=K,post=D);sp|P11217|PYGM_HUMAN(pre=K,post=D);sp|P11217-2|PYGM_HUMAN(pre=K,post=D)	2	465.244	1	0	1	0	1	2	0	2	0	0.587272	1	Valid
843	20160312_15_B1.4563.4563.2 File:"20160312_15_B1.raw", NativeID:"controllerType=0 controllerNumber=1 scan=4563"	DSR+0.984SGSPMAR+0.984R	DSrSGSPMArR	tr|H7BYR8|H7BYR8_HUMAN(pre=R,post=-);sp|P02686|MBP_HUMAN(pre=R,post=-);sp|P02686-3|MBP_HUMAN(pre=R,post=-);sp|P02686-4|MBP_HUMAN(pre=R,post=-);sp|P02686-5|MBP_HUMAN(pre=R,post=-);sp|P02686-6|MBP_HUMAN(pre=R,post=-);tr|E9PJ72|E9PJ72_HUMAN(pre=R,post=-);tr|A8MZH3|A8MZH3_HUMAN(pre=R,post=-);tr|J3QQK6|J3QQK6_HUMAN(pre=R,post=-);tr|F8WEU6|F8WEU6_HUMAN(pre=R,post=-)	2	611.286	2	0	11	1	12	2	0	2	1	0.999999	1	Valid
844	20160312_15_B1.5078.5078.2 File:"20160312_15_B1.raw", NativeID:"controllerType=0 controllerNumber=1 scan=5078"	LSPSPTSQR+0.984SR	LSPSPTSQrSR	sp|P02545|LMNA_HUMAN(pre=R,post=G);sp|P02545-2|LMNA_HUMAN(pre=R,post=G);sp|P02545-3|LMNA_HUMAN(pre=R,post=G);sp|P02545-4|LMNA_HUMAN(pre=R,post=G);sp|P02545-5|LMNA_HUMAN(pre=R,post=G);sp|P02545-6|LMNA_HUMAN(pre=R,post=G);tr|Q3BDU5|Q3BDU5_HUMAN(pre=R,post=G);tr|Q5TCI8|Q5TCI8_HUMAN(pre=R,post=G);tr|A0A0C4DGC5|A0A0C4DGC5_HUMAN(pre=R,post=G)	2	608.818	1	0	12	3	15	1	0	1	0	0.999998	1	Valid
845	20160312_15_B1.508.508.2 File:"20160312_15_B1.raw", NativeID:"controllerType=0 controllerNumber=1 scan=508"	DSR+0.984SGSPM+15.995AR	DSrSGSPmAR	tr|H7BYR8|H7BYR8_HUMAN(pre=R,post=R);sp|P02686|MBP_HUMAN(pre=R,post=R);sp|P02686-3|MBP_HUMAN(pre=R,post=R);sp|P02686-4|MBP_HUMAN(pre=R,post=R);sp|P02686-5|MBP_HUMAN(pre=R,post=R);sp|P02686-6|MBP_HUMAN(pre=R,post=R);tr|E9PJ72|E9PJ72_HUMAN(pre=R,post=R);tr|A8MZH3|A8MZH3_HUMAN(pre=R,post=R);tr|J3QQK6|J3QQK6_HUMAN(pre=R,post=R);tr|F8WEU6|F8WEU6_HUMAN(pre=R,post=R)	2	540.741	1	0	1	2	3	2	0	2	1	0.993849	1	Valid
846	20160312_15_B1.5252.5252.2 File:"20160312_15_B1.raw", NativeID:"controllerType=0 controllerNumber=1 scan=5252"	LGGRDSR+0.984SGSPMAR	LGGRDSrSGSPMAR	tr|H7BYR8|H7BYR8_HUMAN(pre=K,post=R);sp|P02686|MBP_HUMAN(pre=K,post=R);sp|P02686-3|MBP_HUMAN(pre=K,post=R);sp|P02686-4|MBP_HUMAN(pre=K,post=R);sp|P02686-5|MBP_HUMAN(pre=K,post=R);sp|P02686-6|MBP_HUMAN(pre=K,post=R);tr|E9PJ72|E9PJ72_HUMAN(pre=K,post=R);tr|A8MZH3|A8MZH3_HUMAN(pre=K,post=R)	2	724.358	1	4	8	1	13	0	0	0	0	0.999979	1	Valid
847	20160312_15_B1.5260.5260.3 File:"20160312_15_B1.raw", NativeID:"controllerType=0 controllerNumber=1 scan=5260"	LGGRDSR+0.984SGSPMAR	LGGRDSrSGSPMAR	tr|H7BYR8|H7BYR8_HUMAN(pre=K,post=R);sp|P02686|MBP_HUMAN(pre=K,post=R);sp|P02686-3|MBP_HUMAN(pre=K,post=R);sp|P02686-4|MBP_HUMAN(pre=K,post=R);sp|P02686-5|MBP_HUMAN(pre=K,post=R);sp|P02686-6|MBP_HUMAN(pre=K,post=R);tr|E9PJ72|E9PJ72_HUMAN(pre=K,post=R);tr|A8MZH3|A8MZH3_HUMAN(pre=K,post=R)	3	483.241	1	0	4	4	8	0	0	0	0	0.997214	1	Valid
848	20160312_15_B1.5693.5693.3 File:"20160312_15_B1.raw", NativeID:"controllerType=0 controllerNumber=1 scan=5693"	LGGR+0.984DSRSGSPMAR	LGGrDSRSGSPMAR	tr|H7BYR8|H7BYR8_HUMAN(pre=K,post=R);sp|P02686|MBP_HUMAN(pre=K,post=R);sp|P02686-3|MBP_HUMAN(pre=K,post=R);sp|P02686-4|MBP_HUMAN(pre=K,post=R);sp|P02686-5|MBP_HUMAN(pre=K,post=R);sp|P02686-6|MBP_HUMAN(pre=K,post=R);tr|E9PJ72|E9PJ72_HUMAN(pre=K,post=R);tr|A8MZH3|A8MZH3_HUMAN(pre=K,post=R)	3	483.241	1	0	3	1	4	1	0	1	0	0.932673	1	Valid
849	20160312_15_B1.5748.5748.2 File:"20160312_15_B1.raw", NativeID:"controllerType=0 controllerNumber=1 scan=5748"	YYGGGSEGGR+0.984APK	YYGGGSEGGrAPK	sp|P14866|HNRPL_HUMAN(pre=R,post=R)	2	650.302	1	0	4	2	6	0	0	0	0	0.980705	1	Valid
850	20160312_15_B1.630.630.2 File:"20160312_15_B1.raw", NativeID:"controllerType=0 controllerNumber=1 scan=630"	DSR+0.984SGSPM+15.995AR	DSrSGSPmAR	tr|H7BYR8|H7BYR8_HUMAN(pre=R,post=R);sp|P02686|MBP_HUMAN(pre=R,post=R);sp|P02686-3|MBP_HUMAN(pre=R,post=R);sp|P02686-4|MBP_HUMAN(pre=R,post=R);sp|P02686-5|MBP_HUMAN(pre=R,post=R);sp|P02686-6|MBP_HUMAN(pre=R,post=R);tr|E9PJ72|E9PJ72_HUMAN(pre=R,post=R);tr|A8MZH3|A8MZH3_HUMAN(pre=R,post=R);tr|J3QQK6|J3QQK6_HUMAN(pre=R,post=R);tr|F8WEU6|F8WEU6_HUMAN(pre=R,post=R)	2	540.741	1	0	1	1	2	1	0	1	1	0.969442	1	Valid
851	20160312_15_B1.6494.6494.2 File:"20160312_15_B1.raw", NativeID:"controllerType=0 controllerNumber=1 scan=6494"	VTETR+0.984SSFSR	VTETrSSFSR	sp|P07197|NFM_HUMAN(pre=R,post=V);tr|E7EMV2|E7EMV2_HUMAN(pre=R,post=V);tr|E7ESP9|E7ESP9_HUMAN(pre=R,post=V)	2	585.792	1	1	9	2	12	1	1	2	0	0.999985	1	Valid
852	20160312_15_B1.754.754.2 File:"20160312_15_B1.raw", NativeID:"controllerType=0 controllerNumber=1 scan=754"	DSR+0.984SGSPM+15.995AR	DSrSGSPmAR	tr|H7BYR8|H7BYR8_HUMAN(pre=R,post=R);sp|P02686|MBP_HUMAN(pre=R,post=R);sp|P02686-3|MBP_HUMAN(pre=R,post=R);sp|P02686-4|MBP_HUMAN(pre=R,post=R);sp|P02686-5|MBP_HUMAN(pre=R,post=R);sp|P02686-6|MBP_HUMAN(pre=R,post=R);tr|E9PJ72|E9PJ72_HUMAN(pre=R,post=R);tr|A8MZH3|A8MZH3_HUMAN(pre=R,post=R);tr|J3QQK6|J3QQK6_HUMAN(pre=R,post=R);tr|F8WEU6|F8WEU6_HUMAN(pre=R,post=R)	2	540.741	1	0	1	1	2	1	0	1	1	0.969442	1	Valid
853	20160312_15_B1.8206.8206.2 File:"20160312_15_B1.raw", NativeID:"controllerType=0 controllerNumber=1 scan=8206"	TVEM+15.995R+0.984DGEVIK	TVEmrDGEVIK	sp|P14136|GFAP_HUMAN(pre=K,post=E);tr|K7EMP8|K7EMP8_HUMAN(pre=K,post=E);tr|A0A1X7SBR3|A0A1X7SBR3_HUMAN(pre=K,post=E)	2	647.322	1	0	6	2	8	1	1	2	0	0.999242	1	Valid
854	20160312_15_B1.8385.8385.2 File:"20160312_15_B1.raw", NativeID:"controllerType=0 controllerNumber=1 scan=8385"	TVEM+15.995R+0.984DGEVIK	TVEmrDGEVIK	sp|P14136|GFAP_HUMAN(pre=K,post=E);tr|K7EMP8|K7EMP8_HUMAN(pre=K,post=E);tr|A0A1X7SBR3|A0A1X7SBR3_HUMAN(pre=K,post=E)	2	647.322	1	0	4	2	6	1	0	1	0	0.989852	1	Valid
855	20160312_15_B1.8427.8427.2 File:"20160312_15_B1.raw", NativeID:"controllerType=0 controllerNumber=1 scan=8427"	STIGSR+0.984LQAK	STIGSrLQAK	tr|S4R305|S4R305_HUMAN(pre=R,post=V);sp|O75061|AUXI_HUMAN(pre=R,post=V);sp|O75061-2|AUXI_HUMAN(pre=R,post=V);sp|O75061-3|AUXI_HUMAN(pre=R,post=V);sp|O75061-4|AUXI_HUMAN(pre=R,post=V)	2	531.302	1	0	7	3	10	0	2	2	0	0.999892	1	Valid
856	20160312_15_B1.879.879.2 File:"20160312_15_B1.raw", NativeID:"controllerType=0 controllerNumber=1 scan=879"	DSR+0.984SGSPM+15.995AR	DSrSGSPmAR	tr|H7BYR8|H7BYR8_HUMAN(pre=R,post=R);sp|P02686|MBP_HUMAN(pre=R,post=R);sp|P02686-3|MBP_HUMAN(pre=R,post=R);sp|P02686-4|MBP_HUMAN(pre=R,post=R);sp|P02686-5|MBP_HUMAN(pre=R,post=R);sp|P02686-6|MBP_HUMAN(pre=R,post=R);tr|E9PJ72|E9PJ72_HUMAN(pre=R,post=R);tr|A8MZH3|A8MZH3_HUMAN(pre=R,post=R);tr|J3QQK6|J3QQK6_HUMAN(pre=R,post=R);tr|F8WEU6|F8WEU6_HUMAN(pre=R,post=R)	2	540.741	1	0	1	0	1	0	0	0	1	0.861678	1	Valid
857	20160312_15_B1.9214.9214.2 File:"20160312_15_B1.raw", NativeID:"controllerType=0 controllerNumber=1 scan=9214"	ILEQQNSSR+0.984TLEK	ILEQQNSSrTLEK	sp|Q16181|SEPT7_HUMAN(pre=R,post=N);sp|Q16181-2|SEPT7_HUMAN(pre=R,post=N);tr|Q5JXL7|Q5JXL7_HUMAN(pre=R,post=N);tr|E7ES33|E7ES33_HUMAN(pre=R,post=N);tr|E7EPK1|E7EPK1_HUMAN(pre=R,post=N);tr|G3V1Q4|G3V1Q4_HUMAN(pre=R,post=N)	2	773.908	1	0	13	0	13	0	0	0	0	0.999979	1	Valid
858	20160312_15_B1.944.944.2 File:"20160312_15_B1.raw", NativeID:"controllerType=0 controllerNumber=1 scan=944"	R+0.984GNDAVMAR	rGNDAVMAR	sp|P21399|ACOC_HUMAN(pre=R,post=G)	2	495.743	1	0	0	0	0	0	0	0	0	0.127083	0	Valid
859	20160312_15_B1.9751.9751.2 File:"20160312_15_B1.raw", NativeID:"controllerType=0 controllerNumber=1 scan=9751"	ER+0.984NMAPDLR	ErNMAPDLR	sp|P35611|ADDA_HUMAN(pre=R,post=Q);sp|P35611-2|ADDA_HUMAN(pre=R,post=Q);sp|P35611-3|ADDA_HUMAN(pre=R,post=Q);sp|P35611-4|ADDA_HUMAN(pre=R,post=Q);sp|P35611-5|ADDA_HUMAN(pre=R,post=Q);sp|P35611-6|ADDA_HUMAN(pre=R,post=Q);tr|D6RAH3|D6RAH3_HUMAN(pre=R,post=Q);tr|E7ENY0|E7ENY0_HUMAN(pre=R,post=Q);tr|A0A0A0MSR2|A0A0A0MSR2_HUMAN(pre=R,post=Q);tr|D6RJE2|D6RJE2_HUMAN(pre=R,post=Q);tr|E7EV99|E7EV99_HUMAN(…	2	551.77	1	0	1	0	1	0	0	0	0	0.278664	0	Valid
860	20160312_15_B1.9804.9804.2 File:"20160312_15_B1.raw", NativeID:"controllerType=0 controllerNumber=1 scan=9804"	TTQR+0.984IVAPPGGR	TTQrIVAPPGGR	sp|Q16555|DPYL2_HUMAN(pre=R,post=A);sp|Q16555-2|DPYL2_HUMAN(pre=R,post=A);tr|A0A1C7CYX9|A0A1C7CYX9_HUMAN(pre=R,post=A)	2	627.352	1	0	4	3	7	4	3	7	0	0.999923	1	Valid
861	20160312_16_B2.10142.10142.3 File:"20160312_16_B2.raw", NativeID:"controllerType=0 controllerNumber=1 scan=10142"	VHISSVR+0.984SGYSTAR	VHISSVrSGYSTAR	sp|P07196|NFL_HUMAN(pre=R,post=S);tr|A0A0S2Z436|A0A0S2Z436_HUMAN(pre=R,post=S);tr|A0A087X0W2|A0A087X0W2_HUMAN(pre=R,post=S)	3	507.599	1	0	0	0	0	0	0	0	0	0.127083	0	Valid
862	20160312_16_B2.10149.10149.2 File:"20160312_16_B2.raw", NativeID:"controllerType=0 controllerNumber=1 scan=10149"	VHISSVR+0.984SGYSTAR	VHISSVrSGYSTAR	sp|P07196|NFL_HUMAN(pre=R,post=S);tr|A0A0S2Z436|A0A0S2Z436_HUMAN(pre=R,post=S);tr|A0A087X0W2|A0A087X0W2_HUMAN(pre=R,post=S)	2	760.895	1	1	5	0	6	0	0	0	0	0.980705	1	Valid
863	20160312_16_B2.10271.10271.2 File:"20160312_16_B2.raw", NativeID:"controllerType=0 controllerNumber=1 scan=10271"	RFHQR+0.984KETEK	RFHQrKETEK	sp|Q86XH1|DRC11_HUMAN(pre=R,post=L);sp|Q86XH1-2|DRC11_HUMAN(pre=R,post=L);sp|Q86XH1-5|DRC11_HUMAN(pre=R,post=L);tr|A0A0A0MSY6|A0A0A0MSY6_HUMAN(pre=R,post=L);tr|H7BZR5|H7BZR5_HUMAN(pre=R,post=L)	2	680.361	1	0	1	1	2	0	0	0	0	0.5062	1	Valid
864	20160312_16_B2.10406.10406.2 File:"20160312_16_B2.raw", NativeID:"controllerType=0 controllerNumber=1 scan=10406"	ILEQQN+0.984SSR+0.984TLEK	ILEQQnSSrTLEK	sp|Q16181|SEPT7_HUMAN(pre=R,post=N);sp|Q16181-2|SEPT7_HUMAN(pre=R,post=N);tr|Q5JXL7|Q5JXL7_HUMAN(pre=R,post=N);tr|E7ES33|E7ES33_HUMAN(pre=R,post=N);tr|E7EPK1|E7EPK1_HUMAN(pre=R,post=N);tr|G3V1Q4|G3V1Q4_HUMAN(pre=R,post=N)	2	774.4	1	0	15	1	16	0	0	0	0	0.999999	1	Valid
865	20160312_16_B2.10486.10486.2 File:"20160312_16_B2.raw", NativeID:"controllerType=0 controllerNumber=1 scan=10486"	R+0.984APTTALTLR	rAPTTALTLR	sp|Q9UPX8|SHAN2_HUMAN(pre=K,post=S);sp|Q9UPX8-2|SHAN2_HUMAN(pre=K,post=S);sp|Q9UPX8-3|SHAN2_HUMAN(pre=K,post=S);sp|Q9UPX8-4|SHAN2_HUMAN(pre=K,post=S);tr|B7ZKU9|B7ZKU9_HUMAN(pre=K,post=S);tr|A0A0A0MSQ6|A0A0A0MSQ6_HUMAN(pre=K,post=S);tr|A6NHU9|A6NHU9_HUMAN(pre=K,post=S);tr|E7EX50|E7EX50_HUMAN(pre=K,post=S);tr|H7C1X5|H7C1X5_HUMAN(pre=K,post=S);tr|E7EUA2|E7EUA2_HUMAN(pre=K,post=S);tr|H0Y7S5|H0Y7S5_HU…	2	550.825	1	0	1	0	1	0	0	0	0	0.278664	0	Valid
866	20160312_16_B2.10598.10598.2 File:"20160312_16_B2.raw", NativeID:"controllerType=0 controllerNumber=1 scan=10598"	ILEQQN+0.984SSR+0.984TLEK	ILEQQnSSrTLEK	sp|Q16181|SEPT7_HUMAN(pre=R,post=N);sp|Q16181-2|SEPT7_HUMAN(pre=R,post=N);tr|Q5JXL7|Q5JXL7_HUMAN(pre=R,post=N);tr|E7ES33|E7ES33_HUMAN(pre=R,post=N);tr|E7EPK1|E7EPK1_HUMAN(pre=R,post=N);tr|G3V1Q4|G3V1Q4_HUMAN(pre=R,post=N)	2	774.4	1	0	9	0	9	0	0	0	0	0.998948	1	Valid
867	20160312_16_B2.1109.1109.2 File:"20160312_16_B2.raw", NativeID:"controllerType=0 controllerNumber=1 scan=1109"	KFQAR+0.984EK	KFQArEK	sp|Q2M218|ZN630_HUMAN(pre=K,post=P);sp|Q2M218-2|ZN630_HUMAN(pre=K,post=P);tr|B2ZWH0|B2ZWH0_HUMAN(pre=K,post=P);tr|A0A087WXA8|A0A087WXA8_HUMAN(pre=K,post=P)	2	454.254	1	0	0	0	0	0	0	0	0	0.127083	0	Ambiguous
868	20160312_16_B2.11179.11179.2 File:"20160312_16_B2.raw", NativeID:"controllerType=0 controllerNumber=1 scan=11179"	GPGPGGPGGAGVAR+0.984GGAGGGPSGD	GPGPGGPGGAGVArGGAGGGPSGD	sp|Q92686|NEUG_HUMAN(pre=K,post=-)	2	910.42	1	0	4	4	8	1	0	1	0	0.998546	1	Valid
869	20160312_16_B2.11192.11192.3 File:"20160312_16_B2.raw", NativeID:"controllerType=0 controllerNumber=1 scan=11192"	EAGTVGR+0.984GGGQEERPFVAR	EAGTVGrGGGQEERPFVAR	sp|Q9HA64|KT3K_HUMAN(pre=K,post=F);tr|I3L2G3|I3L2G3_HUMAN(pre=K,post=F)	3	658.665	1	1	9	1	11	1	0	1	0	0.999922	1	Valid
870	20160312_16_B2.11283.11283.2 File:"20160312_16_B2.raw", NativeID:"controllerType=0 controllerNumber=1 scan=11283"	NIVTPR+0.984TPPPSQ+0.984GK	NIVTPrTPPPSqGK	tr|H7BYR8|H7BYR8_HUMAN(pre=K,post=G);sp|P02686|MBP_HUMAN(pre=K,post=G);sp|P02686-3|MBP_HUMAN(pre=K,post=G);sp|P02686-4|MBP_HUMAN(pre=K,post=G);sp|P02686-5|MBP_HUMAN(pre=K,post=G);sp|P02686-6|MBP_HUMAN(pre=K,post=G);tr|C9J6H1|C9J6H1_HUMAN(pre=K,post=G);tr|J3QL64|J3QL64_HUMAN(pre=K,post=G);tr|E9PJ72|E9PJ72_HUMAN(pre=K,post=G);tr|J3QKL5|J3QKL5_HUMAN(pre=K,post=G);tr|J3KT01|J3KT01_HUMAN(pre=K,post=G)…	2	747.402	1	0	8	4	12	2	4	6	0	0.999999	1	Valid
871	20160312_16_B2.11476.11476.2 File:"20160312_16_B2.raw", NativeID:"controllerType=0 controllerNumber=1 scan=11476"	NIVTPR+0.984TPPPSQ+0.984GK	NIVTPrTPPPSqGK	tr|H7BYR8|H7BYR8_HUMAN(pre=K,post=G);sp|P02686|MBP_HUMAN(pre=K,post=G);sp|P02686-3|MBP_HUMAN(pre=K,post=G);sp|P02686-4|MBP_HUMAN(pre=K,post=G);sp|P02686-5|MBP_HUMAN(pre=K,post=G);sp|P02686-6|MBP_HUMAN(pre=K,post=G);tr|C9J6H1|C9J6H1_HUMAN(pre=K,post=G);tr|J3QL64|J3QL64_HUMAN(pre=K,post=G);tr|E9PJ72|E9PJ72_HUMAN(pre=K,post=G);tr|J3QKL5|J3QKL5_HUMAN(pre=K,post=G);tr|J3KT01|J3KT01_HUMAN(pre=K,post=G)…	2	747.402	1	0	5	2	7	2	2	4	0	0.999454	1	Valid
872	20160312_16_B2.11484.11484.3 File:"20160312_16_B2.raw", NativeID:"controllerType=0 controllerNumber=1 scan=11484"	NIVTPR+0.984TPPPSQ+0.984GK	NIVTPrTPPPSqGK	tr|H7BYR8|H7BYR8_HUMAN(pre=K,post=G);sp|P02686|MBP_HUMAN(pre=K,post=G);sp|P02686-3|MBP_HUMAN(pre=K,post=G);sp|P02686-4|MBP_HUMAN(pre=K,post=G);sp|P02686-5|MBP_HUMAN(pre=K,post=G);sp|P02686-6|MBP_HUMAN(pre=K,post=G);tr|C9J6H1|C9J6H1_HUMAN(pre=K,post=G);tr|J3QL64|J3QL64_HUMAN(pre=K,post=G);tr|E9PJ72|E9PJ72_HUMAN(pre=K,post=G);tr|J3QKL5|J3QKL5_HUMAN(pre=K,post=G);tr|J3KT01|J3KT01_HUMAN(pre=K,post=G)…	3	498.604	1	0	0	1	1	2	0	2	0	0.587272	1	Valid
873	20160312_16_B2.11519.11519.3 File:"20160312_16_B2.raw", NativeID:"controllerType=0 controllerNumber=1 scan=11519"	AR+0.984VDHGAEIITQSPGR	ArVDHGAEIITQSPGR	sp|P11137|MTAP2_HUMAN(pre=K,post=S);sp|P11137-2|MTAP2_HUMAN(pre=K,post=S);sp|P11137-3|MTAP2_HUMAN(pre=K,post=S);sp|P11137-4|MTAP2_HUMAN(pre=K,post=S)	3	569.964	1	0	3	0	3	0	0	0	0	0.731196	1	Valid
874	20160312_16_B2.11552.11552.2 File:"20160312_16_B2.raw", NativeID:"controllerType=0 controllerNumber=1 scan=11552"	QEAEQLR+0.984NQIR	QEAEQLrNQIR	sp|P62879|GBB2_HUMAN(pre=R,post=D);tr|C9JZN1|C9JZN1_HUMAN(pre=R,post=D);tr|C9JXA5|C9JXA5_HUMAN(pre=R,post=D);tr|C9JIS1|C9JIS1_HUMAN(pre=R,post=D)	2	693.361	1	1	2	1	4	0	0	0	0	0.878318	1	Valid
875	20160312_16_B2.11631.11631.2 File:"20160312_16_B2.raw", NativeID:"controllerType=0 controllerNumber=1 scan=11631"	GLDR+0.984VQDEYSR	GLDrVQDEYSR	sp|Q7L0J3|SV2A_HUMAN(pre=K,post=R);sp|Q7L0J3-2|SV2A_HUMAN(pre=K,post=R)	2	669.818	1	0	0	2	2	4	0	4	0	0.932918	1	Valid
876	20160312_16_B2.11870.11870.3 File:"20160312_16_B2.raw", NativeID:"controllerType=0 controllerNumber=1 scan=11870"	QASQAGPVPR+0.984TGPPTTQQPR	QASQAGPVPrTGPPTTQQPR	sp|P17600|SYN1_HUMAN(pre=R,post=P);sp|P17600-2|SYN1_HUMAN(pre=R,post=P)	3	692.36	1	0	1	1	2	1	2	3	0	0.878734	1	Valid
877	20160312_16_B2.11878.11878.2 File:"20160312_16_B2.raw", NativeID:"controllerType=0 controllerNumber=1 scan=11878"	TVEMR+0.984DGEVIK	TVEMrDGEVIK	sp|P14136|GFAP_HUMAN(pre=K,post=E);tr|K7EMP8|K7EMP8_HUMAN(pre=K,post=E);tr|A0A1X7SBR3|A0A1X7SBR3_HUMAN(pre=K,post=E)	2	639.324	1	0	5	3	8	2	2	4	0	0.999794	1	Valid
878	20160312_16_B2.11986.11986.2 File:"20160312_16_B2.raw", NativeID:"controllerType=0 controllerNumber=1 scan=11986"	QPSSPGPTPR+0.984NFSEAK	QPSSPGPTPrNFSEAK	sp|Q13424|SNTA1_HUMAN(pre=R,post=H);sp|Q13424-2|SNTA1_HUMAN(pre=R,post=H)	2	850.916	1	2	8	2	12	2	0	2	0	0.999985	1	Valid
879	20160312_16_B2.12114.12114.2 File:"20160312_16_B2.raw", NativeID:"controllerType=0 controllerNumber=1 scan=12114"	TVEMR+0.984DGEVIK	TVEMrDGEVIK	sp|P14136|GFAP_HUMAN(pre=K,post=E);tr|K7EMP8|K7EMP8_HUMAN(pre=K,post=E);tr|A0A1X7SBR3|A0A1X7SBR3_HUMAN(pre=K,post=E)	2	639.324	1	0	5	4	9	2	1	3	0	0.999851	1	Valid
880	20160312_16_B2.12312.12312.2 File:"20160312_16_B2.raw", NativeID:"controllerType=0 controllerNumber=1 scan=12312"	TVEMR+0.984DGEVIK	TVEMrDGEVIK	sp|P14136|GFAP_HUMAN(pre=K,post=E);tr|K7EMP8|K7EMP8_HUMAN(pre=K,post=E);tr|A0A1X7SBR3|A0A1X7SBR3_HUMAN(pre=K,post=E)	2	639.324	1	0	2	2	4	0	0	0	0	0.878318	1	Valid
881	20160312_16_B2.12812.12812.2 File:"20160312_16_B2.raw", NativeID:"controllerType=0 controllerNumber=1 scan=12812"	ITPGAR+0.984GAFSEEYKR	ITPGArGAFSEEYKR	tr|K7ERC4|K7ERC4_HUMAN(pre=K,post=L);tr|C9K0L8|C9K0L8_HUMAN(pre=K,post=L);tr|K7ERZ0|K7ERZ0_HUMAN(pre=K,post=L);tr|K7EN66|K7EN66_HUMAN(pre=K,post=L);sp|P09543|CN37_HUMAN(pre=K,post=L);sp|P09543-2|CN37_HUMAN(pre=K,post=L)	2	841.929	1	0	2	3	5	1	1	2	0	0.986023	1	Valid
882	20160312_16_B2.12836.12836.3 File:"20160312_16_B2.raw", NativeID:"controllerType=0 controllerNumber=1 scan=12836"	R+0.984NNMDFSIR	rNNMDFSIR	sp|Q9P1W8|SIRPG_HUMAN(pre=K,post=I);sp|Q9P1W8-2|SIRPG_HUMAN(pre=K,post=I);sp|Q9P1W8-3|SIRPG_HUMAN(pre=K,post=I);sp|Q9P1W8-4|SIRPG_HUMAN(pre=K,post=I);sp|Q5TFQ8|SIRBL_HUMAN(pre=K,post=I);sp|P78324|SHPS1_HUMAN(pre=K,post=I);sp|P78324-2|SHPS1_HUMAN(pre=K,post=I);sp|P78324-4|SHPS1_HUMAN(pre=K,post=I);tr|H3BUA5|H3BUA5_HUMAN(pre=K,post=I)	3	385.186	1	0	0	0	0	0	0	0	0	0.127083	0	Valid
883	20160312_16_B2.13481.13481.2 File:"20160312_16_B2.raw", NativeID:"controllerType=0 controllerNumber=1 scan=13481"	TVEMR+0.984DGEVIK	TVEMrDGEVIK	sp|P14136|GFAP_HUMAN(pre=K,post=E);tr|K7EMP8|K7EMP8_HUMAN(pre=K,post=E);tr|A0A1X7SBR3|A0A1X7SBR3_HUMAN(pre=K,post=E)	2	639.324	1	0	5	4	9	1	1	2	0	0.999714	1	Valid
884	20160312_16_B2.13500.13500.2 File:"20160312_16_B2.raw", NativeID:"controllerType=0 controllerNumber=1 scan=13500"	LGEYEDVSR+0.984VEK	LGEYEDVSrVEK	sp|Q99426|TBCB_HUMAN(pre=R,post=Y);sp|Q99426-2|TBCB_HUMAN(pre=R,post=Y);tr|K7EP07|K7EP07_HUMAN(pre=R,post=Y);tr|K7EK42|K7EK42_HUMAN(pre=R,post=Y)	2	712.849	1	0	7	2	9	2	0	2	0	0.999714	1	Valid
885	20160312_16_B2.13604.13604.2 File:"20160312_16_B2.raw", NativeID:"controllerType=0 controllerNumber=1 scan=13604"	MER+0.984LQAWMTRM+15.995C+57.021R	MErLQAWMTRmcR	sp|Q9Y5X1|SNX9_HUMAN(pre=R,post=H)	2	893.405	1	0	2	1	3	4	0	4	0	0.973617	1	Valid
886	20160312_16_B2.13631.13631.2 File:"20160312_16_B2.raw", NativeID:"controllerType=0 controllerNumber=1 scan=13631"	EPAAPVSIQR+0.984SAPGGGGK	EPAAPVSIQrSAPGGGGK	sp|Q14847|LASP1_HUMAN(pre=K,post=R);sp|Q14847-3|LASP1_HUMAN(pre=K,post=R)	2	840.44	1	1	10	4	15	1	0	1	0	0.999998	1	Valid
887	20160312_16_B2.14317.14317.3 File:"20160312_16_B2.raw", NativeID:"controllerType=0 controllerNumber=1 scan=14317"	RLDEDLAAYC+57.021R+0.984R	RLDEDLAAYcrR	tr|K7ERC4|K7ERC4_HUMAN(pre=K,post=R);tr|C9K0L8|C9K0L8_HUMAN(pre=K,post=R);tr|K7ERZ0|K7ERZ0_HUMAN(pre=K,post=R);tr|K7EN66|K7EN66_HUMAN(pre=K,post=R);sp|P09543|CN37_HUMAN(pre=K,post=R);sp|P09543-2|CN37_HUMAN(pre=K,post=R)	3	513.585	1	0	3	0	3	0	0	0	0	0.731196	1	Valid
888	20160312_16_B2.14319.14319.2 File:"20160312_16_B2.raw", NativeID:"controllerType=0 controllerNumber=1 scan=14319"	RLDEDLAAYC+57.021R+0.984R	RLDEDLAAYcrR	tr|K7ERC4|K7ERC4_HUMAN(pre=K,post=R);tr|C9K0L8|C9K0L8_HUMAN(pre=K,post=R);tr|K7ERZ0|K7ERZ0_HUMAN(pre=K,post=R);tr|K7EN66|K7EN66_HUMAN(pre=K,post=R);sp|P09543|CN37_HUMAN(pre=K,post=R);sp|P09543-2|CN37_HUMAN(pre=K,post=R)	2	769.873	1	2	4	0	6	0	0	0	0	0.980705	1	Valid
889	20160312_16_B2.14453.14453.3 File:"20160312_16_B2.raw", NativeID:"controllerType=0 controllerNumber=1 scan=14453"	ELR+0.984NQGSTQ+0.984GDPER	ELrNQGSTqGDPER	sp|Q8NCM2|KCNH5_HUMAN(pre=K,post=N)	3	530.245	1	0	1	0	1	0	0	0	0	0.278664	0	Ambiguous
890	20160312_16_B2.14534.14534.2 File:"20160312_16_B2.raw", NativeID:"controllerType=0 controllerNumber=1 scan=14534"	GAEGQR+0.984PGFGYGGR+0.984ASDYK	GAEGQrPGFGYGGrASDYK	tr|H7BYR8|H7BYR8_HUMAN(pre=K,post=S);sp|P02686-4|MBP_HUMAN(pre=K,post=S);sp|P02686-6|MBP_HUMAN(pre=K,post=S)	2	987.951	2	1	14	14	29	4	4	8	0	1	1	Valid
891	20160312_16_B2.14539.14539.3 File:"20160312_16_B2.raw", NativeID:"controllerType=0 controllerNumber=1 scan=14539"	GAEGQR+0.984PGFGYGGR+0.984ASDYK	GAEGQrPGFGYGGrASDYK	tr|H7BYR8|H7BYR8_HUMAN(pre=K,post=S);sp|P02686-4|MBP_HUMAN(pre=K,post=S);sp|P02686-6|MBP_HUMAN(pre=K,post=S)	3	658.97	2	0	8	8	16	3	2	5	0	1	1	Valid
892	20160312_16_B2.15337.15337.3 File:"20160312_16_B2.raw", NativeID:"controllerType=0 controllerNumber=1 scan=15337"	DSLR+0.984STPSHGSVSSLNSTGSLSPK	DSLrSTPSHGSVSSLNSTGSLSPK	sp|Q9UBC2|EP15R_HUMAN(pre=K,post=H);sp|Q9UBC2-2|EP15R_HUMAN(pre=K,post=H);sp|Q9UBC2-3|EP15R_HUMAN(pre=K,post=H);sp|Q9UBC2-4|EP15R_HUMAN(pre=K,post=H);tr|M0R165|M0R165_HUMAN(pre=K,post=H);tr|M0R2S2|M0R2S2_HUMAN(pre=K,post=H)	3	801.399	1	0	1	1	2	2	0	2	0	0.790609	1	Valid
893	20160312_16_B2.15597.15597.3 File:"20160312_16_B2.raw", NativeID:"controllerType=0 controllerNumber=1 scan=15597"	ELQSLAVAQ+0.984R+0.984DHM+15.995LR	ELQSLAVAqrDHmLR	sp|Q7Z403|TMC6_HUMAN(pre=K,post=G);sp|Q7Z403-2|TMC6_HUMAN(pre=K,post=G);tr|K7ERH0|K7ERH0_HUMAN(pre=K,post=G)	3	595.637	1	0	0	0	0	0	0	0	0	0.127083	0	Valid
894	20160312_16_B2.15820.15820.3 File:"20160312_16_B2.raw", NativeID:"controllerType=0 controllerNumber=1 scan=15820"	GGGGNFGPGPGSNFR+0.984GGSDGYGSGR	GGGGNFGPGPGSNFrGGSDGYGSGR	sp|P22626|ROA2_HUMAN(pre=R,post=G);sp|P22626-2|ROA2_HUMAN(pre=R,post=G)	3	757.997	1	0	4	3	7	0	0	0	0	0.99264	1	Valid
895	20160312_16_B2.15845.15845.2 File:"20160312_16_B2.raw", NativeID:"controllerType=0 controllerNumber=1 scan=15845"	GGGGNFGPGPGSNFR+0.984GGSDGYGSGR	GGGGNFGPGPGSNFrGGSDGYGSGR	sp|P22626|ROA2_HUMAN(pre=R,post=G);sp|P22626-2|ROA2_HUMAN(pre=R,post=G)	2	1136.49	1	1	6	2	9	0	0	0	0	0.998948	1	Valid
896	20160312_16_B2.15883.15883.3 File:"20160312_16_B2.raw", NativeID:"controllerType=0 controllerNumber=1 scan=15883"	YLATASTMDHAR+0.984HGFLPR+0.984HR	YLATASTMDHArHGFLPrHR	tr|H7BYR8|H7BYR8_HUMAN(pre=K,post=D);sp|P02686|MBP_HUMAN(pre=K,post=D);sp|P02686-2|MBP_HUMAN(pre=K,post=D);sp|P02686-3|MBP_HUMAN(pre=K,post=D);sp|P02686-4|MBP_HUMAN(pre=K,post=D);sp|P02686-5|MBP_HUMAN(pre=K,post=D);sp|P02686-6|MBP_HUMAN(pre=K,post=D);tr|E9PKX9|E9PKX9_HUMAN(pre=K,post=D);tr|J3QL64|J3QL64_HUMAN(pre=K,post=D);tr|J3KT34|J3KT34_HUMAN(pre=K,post=D);tr|J3QKL5|J3QKL5_HUMAN(pre=K,post=D);…	3	780.387	2	0	9	3	12	0	0	0	0	0.999944	1	Valid
897	20160312_16_B2.1591.1591.2 File:"20160312_16_B2.raw", NativeID:"controllerType=0 controllerNumber=1 scan=1591"	VTSGSTTTTR+0.984R	VTSGSTTTTrR	sp|P02671|FIBA_HUMAN(pre=K,post=S);sp|P02671-2|FIBA_HUMAN(pre=K,post=S)	2	584.302	1	0	2	0	2	0	0	0	0	0.5062	1	Valid
898	20160312_16_B2.16000.16000.5 File:"20160312_16_B2.raw", NativeID:"controllerType=0 controllerNumber=1 scan=16000"	YLATASTMDHAR+0.984HGFLPR+0.984HR	YLATASTMDHArHGFLPrHR	tr|H7BYR8|H7BYR8_HUMAN(pre=K,post=D);sp|P02686|MBP_HUMAN(pre=K,post=D);sp|P02686-2|MBP_HUMAN(pre=K,post=D);sp|P02686-3|MBP_HUMAN(pre=K,post=D);sp|P02686-4|MBP_HUMAN(pre=K,post=D);sp|P02686-5|MBP_HUMAN(pre=K,post=D);sp|P02686-6|MBP_HUMAN(pre=K,post=D);tr|E9PKX9|E9PKX9_HUMAN(pre=K,post=D);tr|J3QL64|J3QL64_HUMAN(pre=K,post=D);tr|J3KT34|J3KT34_HUMAN(pre=K,post=D);tr|J3QKL5|J3QKL5_HUMAN(pre=K,post=D);…	5	468.636	2	0	3	1	4	1	0	1	0	0.932673	1	Valid
899	20160312_16_B2.16037.16037.3 File:"20160312_16_B2.raw", NativeID:"controllerType=0 controllerNumber=1 scan=16037"	YLATASTMDHAR+0.984HGFLPR+0.984HR	YLATASTMDHArHGFLPrHR	tr|H7BYR8|H7BYR8_HUMAN(pre=K,post=D);sp|P02686|MBP_HUMAN(pre=K,post=D);sp|P02686-2|MBP_HUMAN(pre=K,post=D);sp|P02686-3|MBP_HUMAN(pre=K,post=D);sp|P02686-4|MBP_HUMAN(pre=K,post=D);sp|P02686-5|MBP_HUMAN(pre=K,post=D);sp|P02686-6|MBP_HUMAN(pre=K,post=D);tr|E9PKX9|E9PKX9_HUMAN(pre=K,post=D);tr|J3QL64|J3QL64_HUMAN(pre=K,post=D);tr|J3KT34|J3KT34_HUMAN(pre=K,post=D);tr|J3QKL5|J3QKL5_HUMAN(pre=K,post=D);…	3	780.387	2	0	6	2	8	0	0	0	0	0.997214	1	Valid
900	20160312_16_B2.16101.16101.4 File:"20160312_16_B2.raw", NativeID:"controllerType=0 controllerNumber=1 scan=16101"	YLATASTMDHAR+0.984HGFLPR+0.984HR	YLATASTMDHArHGFLPrHR	tr|H7BYR8|H7BYR8_HUMAN(pre=K,post=D);sp|P02686|MBP_HUMAN(pre=K,post=D);sp|P02686-2|MBP_HUMAN(pre=K,post=D);sp|P02686-3|MBP_HUMAN(pre=K,post=D);sp|P02686-4|MBP_HUMAN(pre=K,post=D);sp|P02686-5|MBP_HUMAN(pre=K,post=D);sp|P02686-6|MBP_HUMAN(pre=K,post=D);tr|E9PKX9|E9PKX9_HUMAN(pre=K,post=D);tr|J3QL64|J3QL64_HUMAN(pre=K,post=D);tr|J3KT34|J3KT34_HUMAN(pre=K,post=D);tr|J3QKL5|J3QKL5_HUMAN(pre=K,post=D);…	4	585.543	2	0	0	0	0	0	0	0	0	0.127083	0	Ambiguous
901	20160312_16_B2.16312.16312.3 File:"20160312_16_B2.raw", NativeID:"controllerType=0 controllerNumber=1 scan=16312"	R+0.984NLDIERPTYTNLNR	rNLDIERPTYTNLNR	sp|Q6PEY2|TBA3E_HUMAN(pre=R,post=L);sp|P0DPH7|TBA3C_HUMAN(pre=R,post=L);sp|P0DPH7-2|TBA3C_HUMAN(pre=R,post=L);sp|Q9NY65|TBA8_HUMAN(pre=R,post=L);sp|Q9NY65-2|TBA8_HUMAN(pre=R,post=L);sp|P68363|TBA1B_HUMAN(pre=R,post=L);sp|Q9BQE3|TBA1C_HUMAN(pre=R,post=L);sp|P0DPH8|TBA3D_HUMAN(pre=R,post=L);sp|Q71U36|TBA1A_HUMAN(pre=R,post=L);sp|Q71U36-2|TBA1A_HUMAN(pre=R,post=L);sp|P68366|TBA4A_HUMAN(pre=R,post=L)…	3	625.994	1	0	2	0	2	0	0	0	1	0.942956	1	Valid
902	20160312_16_B2.16355.16355.2 File:"20160312_16_B2.raw", NativeID:"controllerType=0 controllerNumber=1 scan=16355"	R+0.984NLDIERPTYTNLNR	rNLDIERPTYTNLNR	sp|Q6PEY2|TBA3E_HUMAN(pre=R,post=L);sp|P0DPH7|TBA3C_HUMAN(pre=R,post=L);sp|P0DPH7-2|TBA3C_HUMAN(pre=R,post=L);sp|Q9NY65|TBA8_HUMAN(pre=R,post=L);sp|Q9NY65-2|TBA8_HUMAN(pre=R,post=L);sp|P68363|TBA1B_HUMAN(pre=R,post=L);sp|Q9BQE3|TBA1C_HUMAN(pre=R,post=L);sp|P0DPH8|TBA3D_HUMAN(pre=R,post=L);sp|Q71U36|TBA1A_HUMAN(pre=R,post=L);sp|Q71U36-2|TBA1A_HUMAN(pre=R,post=L);sp|P68366|TBA4A_HUMAN(pre=R,post=L)…	2	938.488	1	3	4	0	7	0	0	0	0	0.99264	1	Valid
903	20160312_16_B2.17417.17417.3 File:"20160312_16_B2.raw", NativeID:"controllerType=0 controllerNumber=1 scan=17417"	MLTAQDMSYDEAR+0.984NLHSK	MLTAQDMSYDEArNLHSK	sp|Q01082|SPTB2_HUMAN(pre=K,post=W);sp|Q01082-2|SPTB2_HUMAN(pre=K,post=W);sp|Q01082-3|SPTB2_HUMAN(pre=K,post=W);tr|A0A087WUZ3|A0A087WUZ3_HUMAN(pre=K,post=W)	3	704.323	1	0	0	0	0	0	0	0	0	0.127083	0	Ambiguous
904	20160312_16_B2.17546.17546.3 File:"20160312_16_B2.raw", NativeID:"controllerType=0 controllerNumber=1 scan=17546"	GASQAGMLAPGTR+0.984R+0.984DIYDQK	GASQAGMLAPGTrrDIYDQK	sp|Q15417|CNN3_HUMAN(pre=K,post=L);sp|Q15417-2|CNN3_HUMAN(pre=K,post=L);sp|Q15417-3|CNN3_HUMAN(pre=K,post=L)	3	713.017	2	0	3	1	4	0	0	0	0	0.878318	1	Valid
905	20160312_16_B2.1825.1825.2 File:"20160312_16_B2.raw", NativeID:"controllerType=0 controllerNumber=1 scan=1825"	DSR+0.984SGSPM+15.995AR+0.984R	DSrSGSPmArR	tr|H7BYR8|H7BYR8_HUMAN(pre=R,post=-);sp|P02686|MBP_HUMAN(pre=R,post=-);sp|P02686-3|MBP_HUMAN(pre=R,post=-);sp|P02686-4|MBP_HUMAN(pre=R,post=-);sp|P02686-5|MBP_HUMAN(pre=R,post=-);sp|P02686-6|MBP_HUMAN(pre=R,post=-);tr|E9PJ72|E9PJ72_HUMAN(pre=R,post=-);tr|A8MZH3|A8MZH3_HUMAN(pre=R,post=-);tr|J3QQK6|J3QQK6_HUMAN(pre=R,post=-);tr|F8WEU6|F8WEU6_HUMAN(pre=R,post=-)	2	619.284	2	0	2	0	2	0	0	0	0	0.5062	1	Valid
906	20160312_16_B2.18316.18316.4 File:"20160312_16_B2.raw", NativeID:"controllerType=0 controllerNumber=1 scan=18316"	TIEAHSR+0.984MVIPGGIDVHTR	TIEAHSrMVIPGGIDVHTR	sp|Q16555|DPYL2_HUMAN(pre=K,post=F);sp|Q16555-2|DPYL2_HUMAN(pre=K,post=F);tr|E5RFU4|E5RFU4_HUMAN(pre=K,post=F);tr|A0A1C7CYX9|A0A1C7CYX9_HUMAN(pre=K,post=F)	4	523.276	1	0	6	4	10	0	0	0	0	0.999603	1	Valid
907	20160312_16_B2.19045.19045.3 File:"20160312_16_B2.raw", NativeID:"controllerType=0 controllerNumber=1 scan=19045"	LAAGHELQPLAIVDQRPSSR+0.984ASSR	LAAGHELQPLAIVDQRPSSrASSR	sp|P17302|CXA1_HUMAN(pre=K,post=A)	3	854.125	1	2	10	1	13	0	0	0	0	0.999979	1	Valid
908	20160312_16_B2.19065.19065.4 File:"20160312_16_B2.raw", NativeID:"controllerType=0 controllerNumber=1 scan=19065"	LAAGHELQPLAIVDQRPSSR+0.984ASSR	LAAGHELQPLAIVDQRPSSrASSR	sp|P17302|CXA1_HUMAN(pre=K,post=A)	4	640.846	1	0	12	0	12	0	0	0	0	0.999944	1	Valid
909	20160312_16_B2.19430.19430.4 File:"20160312_16_B2.raw", NativeID:"controllerType=0 controllerNumber=1 scan=19430"	NGLHR+0.984PVSTDFAQYNSYGDVSGGVR	NGLHrPVSTDFAQYNSYGDVSGGVR	sp|O14639|ABLM1_HUMAN(pre=R,post=D);sp|O14639-2|ABLM1_HUMAN(pre=R,post=D);sp|O14639-3|ABLM1_HUMAN(pre=R,post=D);sp|O14639-4|ABLM1_HUMAN(pre=R,post=D);sp|O14639-5|ABLM1_HUMAN(pre=R,post=D);sp|O14639-6|ABLM1_HUMAN(pre=R,post=D);tr|A0A0A0MRL6|A0A0A0MRL6_HUMAN(pre=R,post=D);tr|F8W8M4|F8W8M4_HUMAN(pre=R,post=D);tr|J3QSX6|J3QSX6_HUMAN(pre=R,post=D);tr|A0A3B3IS55|A0A3B3IS55_HUMAN(pre=R,post=D)	4	675.072	1	0	0	0	0	0	0	0	0	0.127083	0	Valid
910	20160312_16_B2.20239.20239.2 File:"20160312_16_B2.raw", NativeID:"controllerType=0 controllerNumber=1 scan=20239"	NGQTR+0.984EHALLAYTLGVK	NGQTrEHALLAYTLGVK	sp|Q5VTE0|EF1A3_HUMAN(pre=K,post=Q);sp|P68104|EF1A1_HUMAN(pre=K,post=Q);sp|Q05639|EF1A2_HUMAN(pre=K,post=Q);tr|A0A087WV01|A0A087WV01_HUMAN(pre=K,post=Q);tr|A0A2R8Y488|A0A2R8Y488_HUMAN(pre=K,post=Q);tr|A0A2U3TZH3|A0A2U3TZH3_HUMAN(pre=K,post=Q);tr|A0A2R8Y660|A0A2R8Y660_HUMAN(pre=K,post=Q)	2	936.503	1	0	0	1	1	1	0	1	0	0.425753	0	Valid
911	20160312_16_B2.20264.20264.4 File:"20160312_16_B2.raw", NativeID:"controllerType=0 controllerNumber=1 scan=20264"	NGLHR+0.984PVSTDFAQYN+0.984SYGDVSGGVR	NGLHrPVSTDFAQYnSYGDVSGGVR	sp|O14639|ABLM1_HUMAN(pre=R,post=D);sp|O14639-2|ABLM1_HUMAN(pre=R,post=D);sp|O14639-3|ABLM1_HUMAN(pre=R,post=D);sp|O14639-4|ABLM1_HUMAN(pre=R,post=D);sp|O14639-5|ABLM1_HUMAN(pre=R,post=D);sp|O14639-6|ABLM1_HUMAN(pre=R,post=D);tr|A0A0A0MRL6|A0A0A0MRL6_HUMAN(pre=R,post=D);tr|F8W8M4|F8W8M4_HUMAN(pre=R,post=D);tr|J3QSX6|J3QSX6_HUMAN(pre=R,post=D);tr|A0A3B3IS55|A0A3B3IS55_HUMAN(pre=R,post=D)	4	675.318	1	0	0	1	1	0	0	0	0	0.278664	0	Valid
912	20160312_16_B2.20345.20345.3 File:"20160312_16_B2.raw", NativeID:"controllerType=0 controllerNumber=1 scan=20345"	R+0.984MSVIVRN+0.984PEGK	rMSVIVRnPEGK	sp|P98198|AT8B2_HUMAN(pre=K,post=I);sp|P98198-3|AT8B2_HUMAN(pre=K,post=I)	3	463.251	1	0	0	0	0	0	0	0	0	0.127083	0	Valid
913	20160312_16_B2.20498.20498.3 File:"20160312_16_B2.raw", NativeID:"controllerType=0 controllerNumber=1 scan=20498"	NLHQSGFSLSGAQIDDNIPR+0.984R	NLHQSGFSLSGAQIDDNIPrR	sp|Q16555|DPYL2_HUMAN(pre=R,post=T);sp|Q16555-2|DPYL2_HUMAN(pre=R,post=T);tr|A0A1C7CYX9|A0A1C7CYX9_HUMAN(pre=R,post=T)	3	776.057	1	0	4	0	4	0	0	0	0	0.878318	1	Valid
914	20160312_16_B2.20532.20532.4 File:"20160312_16_B2.raw", NativeID:"controllerType=0 controllerNumber=1 scan=20532"	IIR+0.984NGIGIHEHASIDLPGIK	IIrNGIGIHEHASIDLPGIK	sp|Q16531|DDB1_HUMAN(pre=R,post=G);tr|F5GY55|F5GY55_HUMAN(pre=R,post=G)	4	539.307	1	0	0	0	0	0	0	0	0	0.127083	0	Ambiguous
915	20160312_16_B2.20631.20631.3 File:"20160312_16_B2.raw", NativeID:"controllerType=0 controllerNumber=1 scan=20631"	NLHQSGFSLSGAQIDDNIPR+0.984R+0.984TTQR	NLHQSGFSLSGAQIDDNIPrrTTQR	sp|Q16555|DPYL2_HUMAN(pre=R,post=I);sp|Q16555-2|DPYL2_HUMAN(pre=R,post=I);tr|A0A1C7CYX9|A0A1C7CYX9_HUMAN(pre=R,post=I)	3	938.47	2	0	5	2	7	2	1	3	0	0.998952	1	Valid
916	20160312_16_B2.21097.21097.2 File:"20160312_16_B2.raw", NativeID:"controllerType=0 controllerNumber=1 scan=21097"	NGQTR+0.984EHALLAYTLGVK	NGQTrEHALLAYTLGVK	sp|Q5VTE0|EF1A3_HUMAN(pre=K,post=Q);sp|P68104|EF1A1_HUMAN(pre=K,post=Q);sp|Q05639|EF1A2_HUMAN(pre=K,post=Q);tr|A0A087WV01|A0A087WV01_HUMAN(pre=K,post=Q);tr|A0A2R8Y488|A0A2R8Y488_HUMAN(pre=K,post=Q);tr|A0A2U3TZH3|A0A2U3TZH3_HUMAN(pre=K,post=Q);tr|A0A2R8Y660|A0A2R8Y660_HUMAN(pre=K,post=Q)	2	936.503	1	0	0	0	0	0	0	0	0	0.127083	0	Valid
917	20160312_16_B2.21106.21106.4 File:"20160312_16_B2.raw", NativeID:"controllerType=0 controllerNumber=1 scan=21106"	NGQTR+0.984EHALLAYTLGVK	NGQTrEHALLAYTLGVK	sp|Q5VTE0|EF1A3_HUMAN(pre=K,post=Q);sp|P68104|EF1A1_HUMAN(pre=K,post=Q);sp|Q05639|EF1A2_HUMAN(pre=K,post=Q);tr|A0A087WV01|A0A087WV01_HUMAN(pre=K,post=Q);tr|A0A2R8Y488|A0A2R8Y488_HUMAN(pre=K,post=Q);tr|A0A2U3TZH3|A0A2U3TZH3_HUMAN(pre=K,post=Q);tr|A0A2R8Y660|A0A2R8Y660_HUMAN(pre=K,post=Q)	4	468.755	1	0	0	0	0	0	0	0	0	0.127083	0	Ambiguous
918	20160312_16_B2.21323.21323.3 File:"20160312_16_B2.raw", NativeID:"controllerType=0 controllerNumber=1 scan=21323"	GHQAAEIEWLGFR+0.984K	GHQAAEIEWLGFrK	sp|Q8TAM6|ERMIN_HUMAN(pre=K,post=P);sp|Q8TAM6-2|ERMIN_HUMAN(pre=K,post=P);tr|B4DIZ1|B4DIZ1_HUMAN(pre=K,post=P)	3	548.283	1	0	2	3	5	1	1	2	0	0.986023	1	Valid
919	20160312_16_B2.21355.21355.2 File:"20160312_16_B2.raw", NativeID:"controllerType=0 controllerNumber=1 scan=21355"	GHQAAEIEWLGFR+0.984K	GHQAAEIEWLGFrK	sp|Q8TAM6|ERMIN_HUMAN(pre=K,post=P);sp|Q8TAM6-2|ERMIN_HUMAN(pre=K,post=P);tr|B4DIZ1|B4DIZ1_HUMAN(pre=K,post=P)	2	821.921	1	0	1	1	2	1	0	1	0	0.663002	1	Valid
920	20160312_16_B2.21586.21586.4 File:"20160312_16_B2.raw", NativeID:"controllerType=0 controllerNumber=1 scan=21586"	TPPASLYHGYLPENGVLR+0.984PEPTK	TPPASLYHGYLPENGVLrPEPTK	sp|Q8N3V7|SYNPO_HUMAN(pre=R,post=Q);sp|Q8N3V7-2|SYNPO_HUMAN(pre=R,post=Q);sp|Q8N3V7-3|SYNPO_HUMAN(pre=R,post=Q)	4	635.082	1	0	0	0	0	0	0	0	0	0.127083	0	Ambiguous
921	20160312_16_B2.21806.21806.3 File:"20160312_16_B2.raw", NativeID:"controllerType=0 controllerNumber=1 scan=21806"	Q+0.984ATVGDIN+0.984TER+0.984PGMLDFTGK	qATVGDInTErPGMLDFTGK	sp|P07108|ACBP_HUMAN(pre=K,post=A);sp|P07108-2|ACBP_HUMAN(pre=K,post=A);sp|P07108-3|ACBP_HUMAN(pre=K,post=A);sp|P07108-4|ACBP_HUMAN(pre=K,post=A);sp|P07108-5|ACBP_HUMAN(pre=K,post=A);tr|B8ZWD1|B8ZWD1_HUMAN(pre=K,post=A);tr|A0A0A0MTI5|A0A0A0MTI5_HUMAN(pre=K,post=A)	3	718.341	1	0	0	3	3	0	0	0	0	0.731196	1	Valid
922	20160312_16_B2.21970.21970.2 File:"20160312_16_B2.raw", NativeID:"controllerType=0 controllerNumber=1 scan=21970"	R+0.984GTGGVDTAAVGGVFDVSNADR	rGTGGVDTAAVGGVFDVSNADR	sp|P12277|KCRB_HUMAN(pre=K,post=L);tr|H0YJG0|H0YJG0_HUMAN(pre=K,post=L)	2	1061.51	1	0	0	0	0	0	0	0	0	0.127083	0	Valid
923	20160312_16_B2.21989.21989.3 File:"20160312_16_B2.raw", NativeID:"controllerType=0 controllerNumber=1 scan=21989"	R+0.984GTGGVDTAAVGGVFDVSNADR	rGTGGVDTAAVGGVFDVSNADR	sp|P12277|KCRB_HUMAN(pre=K,post=L);tr|H0YJG0|H0YJG0_HUMAN(pre=K,post=L)	3	708.011	1	0	2	0	2	0	0	0	0	0.5062	1	Valid
924	20160312_16_B2.23252.23252.4 File:"20160312_16_B2.raw", NativeID:"controllerType=0 controllerNumber=1 scan=23252"	QQAPPVR+0.984NLHQSGFSLSGAQIDDNIPR	QQAPPVrNLHQSGFSLSGAQIDDNIPR	sp|Q16555|DPYL2_HUMAN(pre=K,post=R);sp|Q16555-2|DPYL2_HUMAN(pre=K,post=R);tr|A0A1C7CYX9|A0A1C7CYX9_HUMAN(pre=K,post=R)	4	737.376	1	0	2	1	3	0	0	0	0	0.731196	1	Valid
925	20160312_16_B2.23325.23325.4 File:"20160312_16_B2.raw", NativeID:"controllerType=0 controllerNumber=1 scan=23325"	TGTYR+0.984QLFHPEQLITGKEDAANNYAR	TGTYrQLFHPEQLITGKEDAANNYAR	sp|P0DPH7|TBA3C_HUMAN(pre=R,post=G);sp|P0DPH7-2|TBA3C_HUMAN(pre=R,post=G);sp|P68363|TBA1B_HUMAN(pre=R,post=G);sp|P68363-2|TBA1B_HUMAN(pre=R,post=G);sp|Q9BQE3|TBA1C_HUMAN(pre=R,post=G);sp|P0DPH8|TBA3D_HUMAN(pre=R,post=G);sp|Q71U36|TBA1A_HUMAN(pre=R,post=G);sp|Q71U36-2|TBA1A_HUMAN(pre=R,post=G);tr|F8VVB9|F8VVB9_HUMAN(pre=R,post=G);tr|F5H5D3|F5H5D3_HUMAN(pre=R,post=G);tr|F8VQQ4|F8VQQ4_HUMAN(pre=R,po…	4	749.374	1	0	1	2	3	2	0	2	0	0.909249	1	Valid
926	20160312_16_B2.23329.23329.5 File:"20160312_16_B2.raw", NativeID:"controllerType=0 controllerNumber=1 scan=23329"	R+0.984ILEM+15.995GITGPEGHALSRPEELEAEAVFR	rILEmGITGPEGHALSRPEELEAEAVFR	sp|Q14194|DPYL1_HUMAN(pre=K,post=A);sp|Q14194-2|DPYL1_HUMAN(pre=K,post=A);tr|E9PD68|E9PD68_HUMAN(pre=K,post=A)	5	625.721	1	0	1	0	1	0	0	0	0	0.278664	0	Ambiguous
927	20160312_16_B2.23343.23343.3 File:"20160312_16_B2.raw", NativeID:"controllerType=0 controllerNumber=1 scan=23343"	TGTYR+0.984QLFHPEQLITGKEDAANNYAR	TGTYrQLFHPEQLITGKEDAANNYAR	sp|P0DPH7|TBA3C_HUMAN(pre=R,post=G);sp|P0DPH7-2|TBA3C_HUMAN(pre=R,post=G);sp|P68363|TBA1B_HUMAN(pre=R,post=G);sp|P68363-2|TBA1B_HUMAN(pre=R,post=G);sp|Q9BQE3|TBA1C_HUMAN(pre=R,post=G);sp|P0DPH8|TBA3D_HUMAN(pre=R,post=G);sp|Q71U36|TBA1A_HUMAN(pre=R,post=G);sp|Q71U36-2|TBA1A_HUMAN(pre=R,post=G);tr|F8VVB9|F8VVB9_HUMAN(pre=R,post=G);tr|F5H5D3|F5H5D3_HUMAN(pre=R,post=G);tr|F8VQQ4|F8VQQ4_HUMAN(pre=R,po…	3	998.829	1	0	4	1	5	1	0	1	0	0.973517	1	Valid
928	20160312_16_B2.23479.23479.5 File:"20160312_16_B2.raw", NativeID:"controllerType=0 controllerNumber=1 scan=23479"	QALLQIGINMM+15.995ALPGGR+0.984HLDSVTLPGQ+0.984R	QALLQIGINMmALPGGrHLDSVTLPGqR	sp|Q1MX18|INSC_HUMAN(pre=K,post=L)	5	601.721	1	0	0	1	1	0	0	0	0	0.278664	0	Valid
929	20160312_16_B2.23506.23506.5 File:"20160312_16_B2.raw", NativeID:"controllerType=0 controllerNumber=1 scan=23506"	IWHHTFYN+0.984ELR+0.984VAPEEHPILLTEAPLNPK	IWHHTFYnELrVAPEEHPILLTEAPLNPK	sp|Q6S8J3|POTEE_HUMAN(pre=K,post=A);sp|P0CG38|POTEI_HUMAN(pre=K,post=A);sp|P0CG39|POTEJ_HUMAN(pre=K,post=A);sp|Q9BYX7|ACTBM_HUMAN(pre=K,post=A)	5	694.162	1	0	0	2	2	0	0	0	0	0.5062	1	Valid
930	20160312_16_B2.24494.24494.4 File:"20160312_16_B2.raw", NativeID:"controllerType=0 controllerNumber=1 scan=24494"	IWHHTFYNELR+0.984VAPEEHPVLLTEAPLNPK	IWHHTFYNELrVAPEEHPVLLTEAPLNPK	tr|I3L4N8|I3L4N8_HUMAN(pre=K,post=A);sp|P63261|ACTG_HUMAN(pre=K,post=A);sp|P60709|ACTB_HUMAN(pre=K,post=A);tr|I3L3I0|I3L3I0_HUMAN(pre=K,post=A);tr|G5E9R0|G5E9R0_HUMAN(pre=K,post=A);tr|A0A2R8Y793|A0A2R8Y793_HUMAN(pre=K,post=A);tr|J3KT65|J3KT65_HUMAN(pre=K,post=A);tr|E7EVS6|E7EVS6_HUMAN(pre=K,post=A);tr|I3L1U9|I3L1U9_HUMAN(pre=K,post=A);tr|K7EM38|K7EM38_HUMAN(pre=K,post=A);tr|I3L3R2|I3L3R2_HUMAN(pr…	4	863.701	1	0	0	1	1	0	0	0	0	0.278664	0	Valid
931	20160312_16_B2.24504.24504.5 File:"20160312_16_B2.raw", NativeID:"controllerType=0 controllerNumber=1 scan=24504"	IWHHTFYN+0.984ELR+0.984VAPEEHPVLLTEAPLNPK	IWHHTFYnELrVAPEEHPVLLTEAPLNPK	tr|I3L4N8|I3L4N8_HUMAN(pre=K,post=A);sp|P63261|ACTG_HUMAN(pre=K,post=A);sp|P60709|ACTB_HUMAN(pre=K,post=A);tr|I3L3I0|I3L3I0_HUMAN(pre=K,post=A);tr|G5E9R0|G5E9R0_HUMAN(pre=K,post=A);tr|A0A2R8Y793|A0A2R8Y793_HUMAN(pre=K,post=A);tr|J3KT65|J3KT65_HUMAN(pre=K,post=A);tr|E7EVS6|E7EVS6_HUMAN(pre=K,post=A);tr|I3L1U9|I3L1U9_HUMAN(pre=K,post=A);tr|K7EM38|K7EM38_HUMAN(pre=K,post=A);tr|I3L3R2|I3L3R2_HUMAN(pr…	5	691.359	1	0	0	0	0	0	0	0	0	0.127083	0	Valid
932	20160312_16_B2.24652.24652.5 File:"20160312_16_B2.raw", NativeID:"controllerType=0 controllerNumber=1 scan=24652"	R+0.984ILEMGITGPEGHALSR+0.984PEELEAEAVFR+0.984	rILEMGITGPEGHALSrPEELEAEAVFr	sp|Q14194|DPYL1_HUMAN(pre=K,post=A);sp|Q14194-2|DPYL1_HUMAN(pre=K,post=A);tr|E9PD68|E9PD68_HUMAN(pre=K,post=A)	5	622.916	3	0	2	0	2	0	0	0	0	0.5062	1	Ambiguous
933	20160312_16_B2.2482.2482.2 File:"20160312_16_B2.raw", NativeID:"controllerType=0 controllerNumber=1 scan=2482"	EVQEMR+0.984NK	EVQEMrNK	sp|P35611|ADDA_HUMAN(pre=K,post=I);sp|P35611-2|ADDA_HUMAN(pre=K,post=I);sp|P35611-3|ADDA_HUMAN(pre=K,post=I);sp|P35611-4|ADDA_HUMAN(pre=K,post=I);sp|P35611-6|ADDA_HUMAN(pre=K,post=I);tr|E7ENY0|E7ENY0_HUMAN(pre=K,post=I);tr|H0Y9H2|H0Y9H2_HUMAN(pre=K,post=I);tr|E7EV99|E7EV99_HUMAN(pre=K,post=I)	2	517.751	1	0	4	2	6	1	0	1	0	0.989852	1	Valid
934	20160312_16_B2.25523.25523.4 File:"20160312_16_B2.raw", NativeID:"controllerType=0 controllerNumber=1 scan=25523"	ARQ+0.984EGSSPEPVEGLAR+0.984DGPR	ARqEGSSPEPVEGLArDGPR	sp|Q9BXH1|BBC3_HUMAN(pre=R,post=P)	4	528.26	1	0	0	0	0	0	0	0	0	0.127083	0	Valid
935	20160312_16_B2.26863.26863.3 File:"20160312_16_B2.raw", NativeID:"controllerType=0 controllerNumber=1 scan=26863"	ISEELTDVDSPLPHYR+0.984VEPSLEGALTK	ISEELTDVDSPLPHYrVEPSLEGALTK	sp|Q8TAM6|ERMIN_HUMAN(pre=K,post=G);sp|Q8TAM6-2|ERMIN_HUMAN(pre=K,post=G);tr|B8ZZ94|B8ZZ94_HUMAN(pre=K,post=G);tr|B4DIZ1|B4DIZ1_HUMAN(pre=K,post=G);tr|F8WAQ2|F8WAQ2_HUMAN(pre=K,post=G);tr|C9J6B4|C9J6B4_HUMAN(pre=K,post=G);tr|C9J8X3|C9J8X3_HUMAN(pre=K,post=G);tr|C9JN04|C9JN04_HUMAN(pre=K,post=G)	3	999.509	1	0	21	3	24	0	0	0	0	1	1	Valid
936	20160312_16_B2.27828.27828.3 File:"20160312_16_B2.raw", NativeID:"controllerType=0 controllerNumber=1 scan=27828"	HVPR+0.984AVFVDLEPTVIDEVR	HVPrAVFVDLEPTVIDEVR	sp|P68363|TBA1B_HUMAN(pre=K,post=T);sp|P68363-2|TBA1B_HUMAN(pre=K,post=T);sp|Q9BQE3|TBA1C_HUMAN(pre=K,post=T);sp|Q71U36|TBA1A_HUMAN(pre=K,post=T);sp|Q71U36-2|TBA1A_HUMAN(pre=K,post=T);tr|F8VVB9|F8VVB9_HUMAN(pre=K,post=T);tr|F5H5D3|F5H5D3_HUMAN(pre=K,post=T);tr|F8VQQ4|F8VQQ4_HUMAN(pre=K,post=T);tr|F8VX09|F8VX09_HUMAN(pre=K,post=T);tr|F8VRK0|F8VRK0_HUMAN(pre=K,post=T);tr|F8VRZ4|F8VRZ4_HUMAN(pre=K,p…	3	731.396	1	0	3	2	5	2	1	3	0	0.992668	1	Valid
937	20160312_16_B2.27939.27939.3 File:"20160312_16_B2.raw", NativeID:"controllerType=0 controllerNumber=1 scan=27939"	EEVEATTVVEWFYR+0.984PEGGK	EEVEATTVVEWFYrPEGGK	sp|Q9NY72|SCN3B_HUMAN(pre=R,post=D);tr|E9PJP6|E9PJP6_HUMAN(pre=R,post=D);tr|E9PQS8|E9PQS8_HUMAN(pre=R,post=D)	3	743.024	1	0	1	0	1	0	0	0	0	0.278664	0	Valid
938	20160312_16_B2.28216.28216.3 File:"20160312_16_B2.raw", NativeID:"controllerType=0 controllerNumber=1 scan=28216"	QNGR+0.984DPPDPYVSLLLLPDK	QNGrDPPDPYVSLLLLPDK	sp|Q9BSJ8|ESYT1_HUMAN(pre=R,post=N);sp|Q9BSJ8-2|ESYT1_HUMAN(pre=R,post=N)	3	713.376	1	0	0	0	0	0	0	0	0	0.127083	0	Valid
939	20160312_16_B2.28255.28255.3 File:"20160312_16_B2.raw", NativeID:"controllerType=0 controllerNumber=1 scan=28255"	R+0.984VAGAVTELIQ+0.984AAEAMK	rVAGAVTELIqAAEAMK	sp|Q9Y4G6|TLN2_HUMAN(pre=K,post=G);tr|A0A1B0GVU7|A0A1B0GVU7_HUMAN(pre=K,post=G);tr|H0YMT1|H0YMT1_HUMAN(pre=K,post=G)	3	587.314	1	0	0	0	0	0	0	0	0	0.127083	0	Valid
940	20160312_16_B2.28644.28644.3 File:"20160312_16_B2.raw", NativeID:"controllerType=0 controllerNumber=1 scan=28644"	QNGR+0.984DPPDPYVSLLLLPDK	QNGrDPPDPYVSLLLLPDK	sp|Q9BSJ8|ESYT1_HUMAN(pre=R,post=N);sp|Q9BSJ8-2|ESYT1_HUMAN(pre=R,post=N)	3	713.376	1	0	0	1	1	0	0	0	0	0.278664	0	Valid
941	20160312_16_B2.29081.29081.4 File:"20160312_16_B2.raw", NativeID:"controllerType=0 controllerNumber=1 scan=29081"	LHDVELHQVAER+0.984VEALGQFVMK	LHDVELHQVAErVEALGQFVMK	sp|O14775|GNB5_HUMAN(pre=K,post=T);sp|O14775-2|GNB5_HUMAN(pre=K,post=T);sp|O14775-3|GNB5_HUMAN(pre=K,post=T);tr|Q96F32|Q96F32_HUMAN(pre=K,post=T);tr|H0YNW7|H0YNW7_HUMAN(pre=K,post=T)	4	638.086	1	0	1	1	2	0	0	0	0	0.5062	1	Valid
942	20160312_16_B2.29169.29169.3 File:"20160312_16_B2.raw", NativeID:"controllerType=0 controllerNumber=1 scan=29169"	NVTESPSFSAGDNPPVLFSSDFR+0.984ISGAPEK	NVTESPSFSAGDNPPVLFSSDFrISGAPEK	sp|P20916|MAG_HUMAN(pre=K,post=Y);sp|P20916-2|MAG_HUMAN(pre=K,post=Y);sp|P20916-3|MAG_HUMAN(pre=K,post=Y)	3	1051.84	1	0	2	0	2	0	0	0	0	0.5062	1	Valid
943	20160312_16_B2.29329.29329.3 File:"20160312_16_B2.raw", NativeID:"controllerType=0 controllerNumber=1 scan=29329"	GVVDSEDLPLNISR+0.984EMLQQSK	GVVDSEDLPLNISrEMLQQSK	sp|P08238|HS90B_HUMAN(pre=R,post=I);sp|P07900|HS90A_HUMAN(pre=R,post=I);sp|P07900-2|HS90A_HUMAN(pre=R,post=I)	3	787.066	1	0	1	1	2	0	0	0	0	0.5062	1	Valid
944	20160312_16_B2.29357.29357.2 File:"20160312_16_B2.raw", NativeID:"controllerType=0 controllerNumber=1 scan=29357"	GVVDSEDLPLNISR+0.984EMLQQSK	GVVDSEDLPLNISrEMLQQSK	sp|P08238|HS90B_HUMAN(pre=R,post=I);sp|P07900|HS90A_HUMAN(pre=R,post=I);sp|P07900-2|HS90A_HUMAN(pre=R,post=I)	2	1180.09	1	0	2	0	2	0	0	0	0	0.5062	1	Valid
945	20160312_16_B2.31268.31268.5 File:"20160312_16_B2.raw", NativeID:"controllerType=0 controllerNumber=1 scan=31268"	R+0.984MM+15.995LSN+0.984Q+0.984N+0.984SKGR+0.984EEMSAKRAKKDVLHSSK	rMmLSnqnSKGrEEMSAKRAKKDVLHSSK	sp|Q5TB80|CE162_HUMAN(pre=R,post=G);sp|Q5TB80-2|CE162_HUMAN(pre=R,post=G)	5	674.334	2	0	5	0	5	0	0	0	0	0.950382	1	Valid
946	20160312_16_B2.31511.31511.5 File:"20160312_16_B2.raw", NativeID:"controllerType=0 controllerNumber=1 scan=31511"	VAIKSQ+0.984PPGISSQHFTYQDPVLLSLSPR+0.984	VAIKSqPPGISSQHFTYQDPVLLSLSPr	sp|Q9ULL4|PLXB3_HUMAN(pre=R,post=W);sp|Q9ULL4-2|PLXB3_HUMAN(pre=R,post=W)	5	614.328	1	0	0	0	0	0	0	0	0	0.127083	0	Ambiguous
947	20160312_16_B2.3200.3200.2 File:"20160312_16_B2.raw", NativeID:"controllerType=0 controllerNumber=1 scan=3200"	AQSGPVR+0.984SGPK	AQSGPVrSGPK	sp|Q01518|CAP1_HUMAN(pre=K,post=P);sp|Q01518-2|CAP1_HUMAN(pre=K,post=P)	2	542.791	1	0	7	0	7	0	0	0	0	0.99264	1	Valid
948	20160312_16_B2.32458.32458.3 File:"20160312_16_B2.raw", NativeID:"controllerType=0 controllerNumber=1 scan=32458"	AR+0.984NDEYENLFNMIVEIPR	ArNDEYENLFNMIVEIPR	sp|Q9H2U2|IPYR2_HUMAN(pre=K,post=W);sp|Q9H2U2-2|IPYR2_HUMAN(pre=K,post=W);sp|Q9H2U2-3|IPYR2_HUMAN(pre=K,post=W);tr|D6RAD3|D6RAD3_HUMAN(pre=K,post=W);tr|D6RGI1|D6RGI1_HUMAN(pre=K,post=W);tr|D6RGV9|D6RGV9_HUMAN(pre=K,post=W)	3	742.029	1	0	0	0	0	0	0	0	0	0.127083	0	Ambiguous
949	20160312_16_B2.33499.33499.4 File:"20160312_16_B2.raw", NativeID:"controllerType=0 controllerNumber=1 scan=33499"	ALLHLAR+0.984SC+57.021QSPARNAR+0.984PC+57.021PLGRFC+57.021AR	ALLHLArScQSPARNArPcPLGRFcAR	sp|Q8NI29|FBX27_HUMAN(pre=R,post=R);tr|M0QYQ6|M0QYQ6_HUMAN(pre=R,post=R);tr|M0R1C3|M0R1C3_HUMAN(pre=R,post=R)	4	785.15	2	0	3	0	3	0	0	0	0	0.731196	1	Valid
950	20160312_16_B2.33865.33865.5 File:"20160312_16_B2.raw", NativeID:"controllerType=0 controllerNumber=1 scan=33865"	LHVDPENFRLLGNVLVC+57.021VLAR+0.984N+0.984FGK	LHVDPENFRLLGNVLVcVLArnFGK	sp|P02042|HBD_HUMAN(pre=K,post=E)	5	577.313	1	1	0	0	1	0	0	0	0	0.278664	0	Valid
951	20160312_16_B2.34782.34782.4 File:"20160312_16_B2.raw", NativeID:"controllerType=0 controllerNumber=1 scan=34782"	QLQVVPLFGDMQ+0.984IELAR+0.984YIKTSAHYEENK	QLQVVPLFGDMqIELArYIKTSAHYEENK	sp|Q7L576|CYFP1_HUMAN(pre=K,post=S);sp|Q96F07|CYFP2_HUMAN(pre=K,post=S);sp|Q96F07-2|CYFP2_HUMAN(pre=K,post=S);tr|H7C229|H7C229_HUMAN(pre=K,post=S);tr|A0A0G2JR96|A0A0G2JR96_HUMAN(pre=K,post=S);tr|E7EW33|E7EW33_HUMAN(pre=K,post=S);tr|A0A0G2JQT1|A0A0G2JQT1_HUMAN(pre=K,post=S);tr|E7EVJ5|E7EVJ5_HUMAN(pre=K,post=S)	4	856.439	1	0	0	0	0	0	0	0	0	0.127083	0	Ambiguous
952	20160312_16_B2.35846.35846.2 File:"20160312_16_B2.raw", NativeID:"controllerType=0 controllerNumber=1 scan=35846"	RR+0.984TVQ+0.984EAR+0.984ALLR+0.984C+57.021R	RrTVqEArALLrcR	sp|Q96S44|PRPK_HUMAN(pre=R,post=R);tr|Q5JZ02|Q5JZ02_HUMAN(pre=R,post=R)	2	894.979	3	0	0	0	0	0	0	0	0	0.127083	0	Valid
953	20160312_16_B2.36383.36383.4 File:"20160312_16_B2.raw", NativeID:"controllerType=0 controllerNumber=1 scan=36383"	HVNDLYEDLR+0.984DGHNLISLLEVLSGDTLPR	HVNDLYEDLrDGHNLISLLEVLSGDTLPR	sp|Q03001|DYST_HUMAN(pre=K,post=E);sp|Q03001-14|DYST_HUMAN(pre=K,post=E);tr|F6QMI7|F6QMI7_HUMAN(pre=K,post=E);tr|E9PHM6|E9PHM6_HUMAN(pre=K,post=E);tr|F8W9J4|F8W9J4_HUMAN(pre=K,post=E);tr|E7ESK0|E7ESK0_HUMAN(pre=K,post=E);tr|Q5T0V7|Q5T0V7_HUMAN(pre=K,post=E);tr|E7ERX3|E7ERX3_HUMAN(pre=K,post=E);tr|E7ETB9|E7ETB9_HUMAN(pre=K,post=E)	4	826.926	1	0	1	2	3	0	0	0	0	0.731196	1	Valid
954	20160312_16_B2.36807.36807.4 File:"20160312_16_B2.raw", NativeID:"controllerType=0 controllerNumber=1 scan=36807"	HISDLYEDLR+0.984DGHNLISLLEVLSGDSLPR	HISDLYEDLrDGHNLISLLEVLSGDSLPR	sp|Q15149|PLEC_HUMAN(pre=R,post=E);sp|Q15149-2|PLEC_HUMAN(pre=R,post=E);sp|Q15149-3|PLEC_HUMAN(pre=R,post=E);sp|Q15149-4|PLEC_HUMAN(pre=R,post=E);sp|Q15149-5|PLEC_HUMAN(pre=R,post=E);sp|Q15149-6|PLEC_HUMAN(pre=R,post=E);sp|Q15149-7|PLEC_HUMAN(pre=R,post=E);sp|Q15149-8|PLEC_HUMAN(pre=R,post=E);sp|Q15149-9|PLEC_HUMAN(pre=R,post=E);tr|E9PMV1|E9PMV1_HUMAN(pre=R,post=E);tr|H0YDN1|H0YDN1_HUMAN(pre=R,po…	4	820.173	1	0	1	0	1	0	0	0	0	0.278664	0	Valid
955	20160312_16_B2.3893.3893.2 File:"20160312_16_B2.raw", NativeID:"controllerType=0 controllerNumber=1 scan=3893"	R+0.984TPAKMC+57.021LN+0.984R	rTPAKMcLnR	sp|Q13510|ASAH1_HUMAN(pre=R,post=T);sp|Q13510-2|ASAH1_HUMAN(pre=R,post=T);sp|Q13510-3|ASAH1_HUMAN(pre=R,post=T);tr|A0A1B0GUW4|A0A1B0GUW4_HUMAN(pre=R,post=T);tr|A0A1B0GUE3|A0A1B0GUE3_HUMAN(pre=R,post=T);tr|A0A1B0GW68|A0A1B0GW68_HUMAN(pre=R,post=T);tr|A0A1B0GUG1|A0A1B0GUG1_HUMAN(pre=R,post=T);tr|A0A1B0GTM3|A0A1B0GTM3_HUMAN(pre=R,post=T);tr|A0A1B0GUA4|A0A1B0GUA4_HUMAN(pre=R,post=T);tr|A0A1B0GTZ5|A0A…	2	624.814	1	1	2	0	3	0	0	0	0	0.731196	1	Valid
956	20160312_16_B2.4238.4238.2 File:"20160312_16_B2.raw", NativeID:"controllerType=0 controllerNumber=1 scan=4238"	NR+0.984DASTLQSQK	NrDASTLQSQK	sp|O00479|HMGN4_HUMAN(pre=K,post=A)	2	624.813	1	0	1	0	1	0	0	0	0	0.278664	0	Valid
957	20160312_16_B2.4438.4438.2 File:"20160312_16_B2.raw", NativeID:"controllerType=0 controllerNumber=1 scan=4438"	N+0.984SPR+0.984NQQKNK	nSPrNQQKNK	sp|Q6NZY4|ZCHC8_HUMAN(pre=K,post=K);sp|Q6NZY4-2|ZCHC8_HUMAN(pre=K,post=K)	2	608.308	1	0	1	0	1	1	1	2	0	0.587272	1	Valid
958	20160312_16_B2.4522.4522.2 File:"20160312_16_B2.raw", NativeID:"controllerType=0 controllerNumber=1 scan=4522"	DNPNR+0.984GNVNPR	DNPNrGNVNPR	sp|Q9Y6W5|WASF2_HUMAN(pre=K,post=K);sp|Q9Y6W5-2|WASF2_HUMAN(pre=K,post=K)	2	627.303	1	0	7	3	10	1	2	3	0	0.999944	1	Valid
959	20160312_16_B2.5353.5353.2 File:"20160312_16_B2.raw", NativeID:"controllerType=0 controllerNumber=1 scan=5353"	R+0.984TQEQISNVK	rTQEQISNVK	sp|O76041-2|NEBL_HUMAN(pre=K,post=Y)	2	602.321	1	0	2	0	2	0	0	0	0	0.5062	1	Valid
960	20160312_16_B2.5377.5377.3 File:"20160312_16_B2.raw", NativeID:"controllerType=0 controllerNumber=1 scan=5377"	LGGRDSR+0.984SGSPMAR	LGGRDSrSGSPMAR	tr|H7BYR8|H7BYR8_HUMAN(pre=K,post=R);sp|P02686|MBP_HUMAN(pre=K,post=R);sp|P02686-3|MBP_HUMAN(pre=K,post=R);sp|P02686-4|MBP_HUMAN(pre=K,post=R);sp|P02686-5|MBP_HUMAN(pre=K,post=R);sp|P02686-6|MBP_HUMAN(pre=K,post=R);tr|E9PJ72|E9PJ72_HUMAN(pre=K,post=R);tr|A8MZH3|A8MZH3_HUMAN(pre=K,post=R)	3	483.241	1	0	4	3	7	0	0	0	0	0.99264	1	Valid
[truncated: 3,934 more rows]

## Sheet: False_negative
Index	Scan_title	Peptide	Mod_peptide	Protein	Charge	mz_Precursor	precNL_count	seqNL_count	intNL_count	Total_NL_count	Dipeptide_count	Tripeptide_count	Total_INT_count	IM-NH3_count	Cit_probability	Cit_prediction
[truncated: 122 more rows]

[truncated: 1 more sheets: Note]
